# Supplementary material for: Label-free detection of the cytotoxicity effect of cisplatin in human leukemic cells using Raman spectroscopy in conjunction with multivariate analysis
Source: Royal Society of Chemistry journal article supplement (doi:10.1039/d4ay00837e), 2024-01-01
Supplement: d4ay00837e1.xlsx [file d4ay00837e1.xlsx]

## Sheet: 0 μmol L
1720.69	11534.7	20874.8	4248.21	8259.23	8511.42	12658.9	21106.7	4286.51	8700.58	8884.48	12661.3	22141.5	4447.7	9298.26	9455.6	4428.81	8875.39	9337.75	13684	22263.4	13417.2	24066.1	4669.82	10031.1	10040.4	8896.26	9800.77	14632.9	24224.7	14366.6
1719.86	11769.9	20706.1	4169.44	8362.89	8515.98	12001.3	20817.6	4278.69	8437.85	8892.66	12251.1	21590.1	4531.62	8560.72	8987.52	4343.14	8809.04	9231.92	12922.5	22909.1	13381.2	23166.2	4883.4	9113.94	9077.62	9496.57	9386.2	13054.3	23500.1	13879.9
1719.02	11710.9	21236.8	4135.72	8322.46	8451.51	11864.4	21624.1	4389.96	8782.3	8667.6	11915.6	22489.9	4503.02	8838.34	8980.64	4724.79	9553.14	8812.04	12465.8	23235.8	11993.2	23408.4	4795.62	9696.19	9019.92	10077.7	9337.18	12754.3	23319.3	12439.7
1718.19	11693.9	20696.1	4222.04	8294.04	8498.09	12763	22099.2	4472.05	9080.58	9147.06	13627.3	23683.4	4840.5	9639.44	9936.17	4885.57	9261.99	9863.22	14796.1	24536.7	13853	24290.7	4947.3	10114.9	10181.9	10086.5	10072.8	15906	24652.3	14928.6
1717.36	11994.9	20947.6	4119.31	8283.63	8631.65	12573.2	21821.3	4436.8	8862.83	9171.7	13218.9	23725.2	4728.12	9338.59	9884.79	4654.42	9267.89	9565.02	13706.7	25667.5	13900.7	25160.4	5019.88	9826.98	10726.6	9974.86	9735.7	14608.7	27525.7	15089.8
1716.52	11692.9	21139	4142.61	8303.22	8582.19	12660.5	22234.5	4251.85	8313.8	9354.26	13777.9	23247.7	4415.5	8631.94	9674.84	4608.89	8743.56	10037.4	14365.2	25433.7	14023.8	24359.7	4641.02	9391.82	10318.4	9552.46	10160.9	15632.8	27139.7	14297.7
1715.69	11618.9	20934.5	4252.88	8307.81	8628.72	11819.2	22917.1	4565.17	9119	8900.34	12263	24845.4	4976.74	9509.12	9250.16	4901.9	9149.53	9010.32	12670.8	27070.9	12850.8	27031.6	5173.2	9995.07	9982.28	9847.01	9517.78	12948	28067.9	13293.6
1714.86	11817.9	20607.1	4231.16	8276.41	8639.25	12752.3	22143.9	4403.98	8387.95	9279.19	13511.5	23686.8	4511.81	8394.82	10148.3	4523.18	8697.64	9484.88	13579.6	23734	13719.3	24244.2	4725.44	9036.97	11120.4	9244.29	9819.9	13815.9	24448.2	13835
1714.02	11863.8	20963.3	4245.44	8376.94	8634.78	12961.2	21856.8	4654.38	8920.88	9157.56	14115.3	22359	4924.11	8922.19	9589.31	4709.91	9792.52	10027.6	14851	22660	14690.8	24450.1	5005.54	9419.45	10086.8	10603.9	10908.6	14992.2	23612.6	15027.7
1713.19	11738.9	21226.6	4256.7	8168.68	8582.36	12267.1	22506.6	4455.67	8768.09	8592.4	13083.7	22584.1	4686.48	8929.66	8792.12	4864.96	9456.48	9011.6	14231.8	23809.4	13181	22725.3	5022.08	9153.93	9283.92	10216.3	9891.85	15249.3	25799.7	13730.6
1712.35	11820.8	20950.2	4142.09	8260.2	8745.74	12076.8	21272.1	4409.82	8591.39	8969.82	13075.1	21959.2	4765.61	9109.24	9855.24	4512.73	8742.79	9499.81	13870.7	22408	13916.1	22434.5	4981.49	9168.04	9858.19	9577.64	10118.7	14050.1	23995.4	13951.3
1711.52	11908.7	21159.4	4183.34	8210.85	8540.48	12457	23027.9	4463.39	8558.26	8574.23	13144	24623.8	4871.15	8945.84	9262.44	4883.92	9120.48	9428.3	13541	25208.3	14264.6	26449.1	5263.07	9733.34	9772.52	9244.91	9809.66	13837.8	26627.5	14965.9
1710.69	11777.9	21104.9	4281.5	8554.01	8592.96	11968	21621.9	4416.64	9305.63	8919.8	12855.8	22979.9	4747.03	9634.72	9478.25	4617.65	10212.3	9390.26	13035.1	24457.9	13123.9	23760.3	4954.57	9765.8	9580.87	10861.8	9858.67	13056.4	25200.8	13715.5
1709.85	11871.7	21248.1	4322.71	8471.68	8531.59	12860	22976.5	4558.72	8857.47	8605.66	14062.8	23110.6	4648.06	9380.18	8986.95	4568.26	9022.37	8783.78	14737.9	23190.9	14648.7	23329.3	4965.9	10267.1	9614.88	9448.6	9259.86	15113.9	23493.5	15843.5
1709.02	11791.8	20774.2	4286.04	8353.43	8703.86	11928.9	21714.2	4481.26	8891.78	9289.48	12771.3	22882.2	4892.9	9631.93	9991.95	4816.98	8962.52	9533.96	14023.8	24798.3	12839.9	23033.2	4971.53	10395.6	10793.2	9847.23	10325.4	14159.2	27139.5	13755.9
1708.18	11942.6	21213.9	4336.22	8420.88	8795.21	13111.4	22595.8	4562.95	8760.84	9365.05	13118.4	22615.1	4673.61	8782.49	9743.26	4873.74	9008.72	10034	14183.6	22731.4	13573.3	23726.6	5050.37	9466.17	9966.79	9446.31	10382.3	14548.3	24838.6	13713.3
1707.35	11880.7	21060.6	4299.55	8491.31	8661.98	12836.7	22873.8	4686.06	8767.27	9082.09	13194.1	24309.9	4834.98	8768.69	9578.35	4910.62	9042.67	9215.12	13951.2	24342	14259.1	26245.6	5189.22	9208.59	10119.7	9050	9312.43	13972.7	26546.3	14881.5
1706.51	11678.1	21272.6	4152.13	8307.26	8897	12207.7	22894.3	4540.67	8808.75	9710.53	12512.3	23324.3	4647.8	9102.89	10655.7	4750.5	9397.34	9724.28	12557.2	24247.2	13212	24288.3	4894.15	9911.1	10746.7	9902	10323.1	12801.8	26222.3	13215.5
1705.68	12026.3	21032.5	4271.15	8530.33	8784.74	12175.6	21435.9	4504.07	9363.26	9474.56	12697.9	21580.5	4537.24	10054.7	9483.37	4830	9762.95	10096.7	12920.8	23281.9	13962.3	21850.1	4982.53	10718.7	9716.01	9788.59	10271.7	13894.6	24868.7	13981.5
1704.84	11955.4	21546.6	4213.57	8612.67	8816.17	12483.7	22826.2	4440.24	8727.62	9149.42	12614.7	23534.4	4524.58	8772.46	9807.82	4558.17	8788.54	9222.16	12679.9	23922.9	13273.6	24962	4727.98	9493.66	10658.3	9544.14	9565.1	13055.8	24118.5	13876.7
1704.01	12177.8	21249.8	4269.7	8608.22	8715.93	13085	21836.1	4632.7	8630.01	8993.27	13478.2	23118.9	4732.83	8972.28	9654.34	4646.01	9043.58	9574.98	14018.8	23639.3	14168.8	24199.3	4975.63	9301.93	9998.38	9118.52	10278.7	14974	24964.2	14262.6
1703.17	12100.9	21087.6	4271.96	8669.57	8765.3	13303	21121.7	4577.31	9235.6	9628.02	14202.9	22022.6	4870.43	9684.82	10351.1	4771.36	9557.63	10418.9	14923.3	22440.2	15085.5	23135.9	5148.44	9998.26	11320.4	10149.6	10746.4	16092.6	22501	15562.6
1702.33	11895.5	21463.9	4343.02	8542.48	8790.73	12429.6	21587.3	4641.96	8712.28	9424.51	13249.6	21951.2	5091.82	9403.07	9578.35	4760.89	9443.19	9679.73	14499.8	23472.8	13503.3	22991.1	5416.82	9937.98	9579.61	9960.62	9701.24	14518.3	24760.7	14775.5
1701.5	11944.3	21343.6	4285.46	8627.75	8828.12	13024	23152.7	4573.29	8789.73	9052.38	13445.4	23822.4	4958.34	9143.86	9053.61	4819.27	9163.9	9841.77	13648.7	25174.1	14325.3	26006	5382.77	9540.54	9594.31	9291.06	10042.8	14464.8	26279.1	15379.2
1700.66	12342.9	21411.7	4410.32	8889.41	8910.34	13502.3	22767.6	4470.53	9171.2	9346.12	14034	24307.8	4842.16	9755.12	9821.43	4774.13	9329.04	9470.17	14149.4	25747.7	14701.4	26494.9	4874.03	9946.75	10519.5	9601.83	9884.97	15102.5	27570.1	15096.5
1699.83	12182.4	21710	4352.77	8852.02	9001.5	12436.2	23534.5	4539.08	9056.23	9750.55	13391.6	25626.7	4652.42	9708.53	10704.5	4818.81	9743.05	10338.5	13636.5	26633.4	14359.9	25766.2	5116.16	9772.7	11279.6	10057.1	11156.2	14650	28990.1	14585.5
1698.99	12296.9	21293.8	4420.77	8713.02	8967.09	12808.1	21580.4	4558.03	9030.25	9680.56	13641	23032.2	4730.36	9071.25	10034.2	4707.3	9251.54	9733.25	14377.4	24686.4	14043	24718.2	5177.06	9443.95	10712	9600.06	10548.7	15103.7	24700.5	15188.9
1698.15	12127.4	21520.3	4431.98	8893.84	8932.69	12698.7	22899.9	4601.86	9329.07	8981.74	13559	24819.9	4943.82	10050	9845.69	4722.2	9657.57	9826.2	14594.6	24874.3	14241	25374.5	5251.51	10455	10512.9	10308.8	10648.8	15576.5	26594.8	15033.7
1697.32	12224	21767.7	4443.17	9092.52	9152.28	13286.3	23447.1	4832.06	9811.69	9689.73	14039.4	24120.1	5084.28	10699.6	10409.4	5172.95	9830.06	10503.2	15001	26193.1	14719.5	24329.4	5230.07	10706.3	11196.8	10090.3	11087.2	15143.3	26508.7	15170.6
1696.48	12386.2	21728.1	4403.58	9067.07	9073.05	13206.3	22711.8	4575.98	9322.62	9420.48	13912.1	23282.2	4913.33	9325.94	10348.9	4935.34	9598.87	9438.87	13994.7	23352.9	14598.2	25220.7	5087.12	9487	10554.9	10402.3	10200.8	14457.7	24935.2	15777.4
1695.64	12300.4	21679.6	4423.74	8963.97	8958	13422.7	22287.1	4628.7	9069.31	9497.45	14522	24109.2	4660.59	9847.94	10301.8	4768.91	9647.41	9596.7	14959.8	24716.2	15201.1	25555.4	4937.74	10610.2	10877.9	10219.7	9952.97	15580.4	25333.6	15362.8
1694.8	12408.9	21756.6	4381.18	8935.57	8863.9	13262.6	22211.1	4749.84	9413.77	9571.12	14438.4	22239	5052.25	9604.76	10266.5	4812.7	10052.7	9653.71	14704.7	22957	14847	23668.7	5496	10453.3	10764	10777.4	9993.53	15369	24502.4	14963.8
1693.97	12400.8	21743.9	4383.42	9113.21	9041.55	13296.4	22118.9	4605.81	9651.49	9078.57	14454.4	23995.9	4854.01	9942.44	9715.16	4785.05	9964.14	9187.99	15867.1	26180.8	14551.1	24050.5	5052.93	10426.1	10098.6	10578.7	10096.7	16200.3	27469.1	15414
1693.13	12270.3	21513.3	4442.38	8929.55	9165.4	12990.9	22353.1	4766.85	9579.74	9211.54	14282.9	23700.5	4792.35	10221.2	9961.68	5098.13	10430.6	9847.26	14466	25003.1	14644.3	24661.6	4860	10274.4	10534.4	10611	10070.4	14482.3	25827.9	14655.2
1692.29	12208.5	21700.7	4378.94	9080.26	9148.91	12369.7	23407.4	4689.78	9632.35	9825.67	12843.8	25594.8	4770.3	9928.5	10115.5	5013.02	10111.9	10059.9	13323.2	26466.6	13653.4	27409.5	5182.82	10384	10969.7	10561.5	10143.8	14300.8	28177.3	15000.4
1691.46	12418.3	21917.8	4497.57	9180.19	9359.25	13003.2	23562.6	4736.26	9592.11	9547.6	13414.9	24441.8	4762.96	10525.8	10245.2	5206.83	10160.7	9862.03	13691	26102.7	13810.9	26058.8	5161.52	10873.3	10628.6	10529.8	10289.8	14965.1	26573.5	13936.6
1690.62	12714.6	21863.4	4496.81	9241.29	9229.35	13199.1	23336	4927.16	9394.28	9911.72	14098.9	24841.3	5258.4	9866.92	10547.1	5194.93	9913.95	10046.9	14229.8	26202.5	14448.6	26683.8	5325.42	10540.2	11429.4	10034.6	10367.9	15525.3	27047.6	15110.4
1689.78	12491.7	21916.3	4579.58	9239.71	9466.45	13180.8	22816.9	4646.9	9885.17	9985.29	13194.8	23642.3	4686.91	10182	10254.8	4880.24	10837.6	10435.4	13764.8	24846.8	14166.1	25337.5	4913.56	10511	10832.9	11743.4	10892.1	14632.9	25068	15458.8
1688.94	12746.1	22017	4531.07	9321.66	9408.17	13991.4	23561.9	4904.15	9434	9895.36	14631.3	25578.5	5143.61	9984.25	9934.7	5230.31	9484.81	10656.8	15321.4	27747.3	15995.7	26659	5289.17	10591.8	10656.7	9875.02	10981.3	16493.7	28026.8	17270
1688.1	12562	22371.2	4601.88	9221.66	9379.72	13213.9	23178.7	4770.83	9379.99	10107.2	13672.3	23202.8	5093.43	10204.7	10200.6	4844.56	9701.76	10312.6	14749.5	24254.9	14594.1	25181.9	5558.84	10550.2	10278.6	10554.6	11021.2	15006.3	24786.1	15795.4
1687.26	12697	21961.8	4595.13	9434.78	9521.26	12974	23634.9	4879.42	9621.95	9958.88	14244	24660.5	5231.88	9956.92	10337.3	5123.26	10209.5	10239.8	14660.8	25346.8	15623.5	24824.1	5361.46	9983.78	10884.7	10228.9	10756.2	15061.5	26482.1	16683.3
1686.43	12754.5	21993.9	4585.41	9328.83	9439.14	13417	22937.1	4736.42	9766.06	9439.23	13648.1	24828.8	5111.94	10324	9902.04	4790.14	10329.5	9458.06	13699.4	26622.3	14020.4	25079.4	5510.54	10924.5	10867.2	11079.7	9751.03	14220.2	26928.9	15304.3
1685.59	12832.8	22490.9	4611.45	9515.04	9452.44	13866.7	22496.7	4741.08	9611.84	9886.64	15200	23431	5064.51	10204.9	10062.7	4983.95	9623.65	10745.4	16617.7	25668.4	16298.8	24211.4	5290.65	11212	10160.4	10505.4	11218.9	17066.7	26091.4	16748.4
1684.75	12917	22573.5	4747.77	9421.03	9584.95	12987.7	24112.6	5060.5	9540	9853.33	13131.6	25606.1	5362.75	9893.1	10366.1	5424.8	9747.21	10824.9	13257.8	26807.2	13229.1	26469.3	5549.31	10110	11061.1	9961.4	11014.8	14013	27971.4	14250
1683.91	13022.1	22003.5	4529.43	9306.19	9663.77	13292.4	23406.6	4843.84	9543.36	9833.79	13844.1	24213.5	4943.43	9654.09	10720.3	5149.63	9838.88	9891.54	14217.1	26027.3	14213.3	24670.8	5128.8	9786.22	11312.7	10317.6	10105	15511.1	26345.8	14692.6
1683.07	12870.9	22348.3	4683.58	9510.18	9578.7	13201.1	23293.1	5037.55	9866.74	10125.7	13679.6	25487.1	5491.62	10073.2	10842.3	5488.97	10774.6	10436.7	14073.8	26937.6	14943.6	25744.1	5822.98	10615.8	11325.6	11203.8	11143	14378.3	27735.5	16226.2
1682.23	12877.7	22273	4709.6	9746.87	9681.33	13007.4	22572.6	4916.59	10392	10004.8	13733.1	23746.2	5231.85	10792.4	10575.1	5169.47	10467	10993.8	13932.5	23848.9	13812.4	24983.8	5412.88	11208.7	11141	11293.1	11486.9	14676.9	24052.7	14108.6
1681.39	13221	22173.9	4714.75	9539.7	9533.74	14302.8	24249.6	4824.66	10399	10110.4	15600.5	26284	5051.37	10783	10851.2	4889.09	11222.3	10811.5	16306.8	27082.3	16679.1	27068.2	5346.48	11505.9	10919.8	12287	11864.6	17428.6	29070.4	18093.6
1680.55	12858.4	22462	4663.32	9895.42	9779.28	14019.6	22781.6	4837.33	10385.6	10168.6	14554.3	24841.9	5197.72	11067.3	10301.8	5181.96	11274.6	10777.5	15734.4	25711.3	14675.3	26234.7	5584.04	11268.2	10937.1	11439.3	11541.2	16408.2	26110.5	14676.3
1679.71	12993.2	22681.5	4701.24	9807.39	9759.75	13003.2	24709	5114.4	9826.71	10291.2	13240	26828.2	5353.54	10063.8	10553.3	5582.33	10553	10323.8	13622.7	27509.6	14241.5	28570.9	5674.29	10961.7	10711.5	11344	10414.7	13979.2	28881.8	14290.2
1678.87	13214.2	22240	4846.3	9900.98	9877.16	13873.3	22627.3	5167.99	9927.92	10626.4	14095.4	24674.3	5196.54	10451.2	11369	5494.3	10893.6	11485.4	14113.9	26756.2	15366.8	25471.1	5252.26	10472.5	11817.8	11267.4	11815.8	15090.7	29363.9	15443.9
1678.03	13104.8	22623.1	4797.85	9756.43	9679.04	13437.8	23931.1	5003.76	10488.3	9863.25	14308.4	25522.8	5183	11095.1	10477.7	5083.72	11413	10014.5	15527.7	25967.8	15231.8	27768	5520.15	11296.9	10788.2	12338.2	10136.9	15555.6	27945	15729
1677.19	13272.2	22643.1	4758.35	9870.82	9966.05	13639	23464.3	5226.62	10268.9	10797.5	13728.1	23766.9	5342.49	10344.2	10803	5409.07	11174.1	11472.6	14295.6	24503.9	14413.2	24567.6	5515.61	11368.4	10991.9	11803.4	11650.4	15711.2	26502.8	14544
1676.35	13347.3	22966.5	4739.69	10071.5	9970.3	14181.9	23133	5084.63	10213	10241	14904.8	23166	5521.23	10486.9	11106.2	5464.39	10385.8	10448.9	15470.7	25359	15227.5	24357.8	5831.97	10998.9	11544.9	11187.2	10544.8	16312.7	26558.9	16281.4
1675.51	13258.7	22802	4756.73	10254.2	10215.5	14580	24915.9	5224.73	10601.7	11107.9	16021.9	25749.2	5463.43	11272.4	11157.3	5645.03	10921.2	11574.6	17342.5	25944.2	17159.4	27875.2	5691.29	11577.3	11995.4	11798.8	12593.7	18732	26904.8	18199
1674.67	13443.9	22444.1	4717.25	9877.68	9904.45	14277.8	23984.8	4730.84	10565.7	10060.1	14852.6	25262.8	5007.58	11128.6	10527.3	4903.16	11319.3	10286.3	15293.3	27720.1	15513.7	27369.5	5484.22	11161.2	11483.5	12308.8	10436.6	16516.9	30383.5	16910.9
1673.83	13447.5	23067.8	4918.67	10215	9997.92	13637.7	24125.7	5168.44	10345.6	10991.6	13759.7	25316.5	5302.55	10434.8	11299.6	5291.2	10695.2	11171.2	13799.9	26880.3	14955.8	27236.1	5392.24	11142.4	11827.9	11435.5	11840.9	14214.9	28177.5	15395
1672.99	13350.1	23037.1	4932.7	10156.8	10347.1	14082.8	23460.8	5094.57	10254.6	10938.8	14331.7	25283.7	5512.87	10388	11367.9	5351.14	10840.5	11889.9	15408.5	25848.5	14763.9	26105.3	5695.51	10532.2	11437.8	10917.6	12084.2	15513	28090.6	15297
1672.15	13350.8	22944	4857.53	10259.1	10345.3	14548.3	25177	4988.64	11120.1	10814.1	14657.9	26668.1	5221.95	12142.9	11729	5393.47	11193.6	11052.8	14953.2	28014.2	15574.4	29195.2	5692.69	12787.5	11732.8	11642	11627.9	15219.9	30626.5	15603.1
1671.31	13455.5	23180.8	4847.79	10474.3	10257.3	13739.8	23355.7	4930.56	11438.6	10816.2	14090.9	25511.4	5097.86	12428.4	11074.9	5136.12	12453.2	11148	14906.7	26310.8	15301.8	26186	5169.57	12865	11521.5	13455.5	11175.2	15413.7	26962.2	16704.2
1670.47	13682	23343.3	4885.6	10350.7	10172.4	13777.1	24267.7	5343.95	11250.7	10946.2	14327.5	25570.5	5399.79	12334.7	11584	5578.63	12101.9	11429.8	15344.2	26812.7	15410	27896	5578.78	12518.1	11688	13089.6	12285.6	16647.4	26986.4	15965.9
1669.63	13248.9	23253.1	5042.24	10402.4	10313.3	14152.4	25292.5	5228.44	10972.6	10388.9	15535.3	25451.7	5574.27	11970.6	10390.7	5333.85	11204.5	10907.5	16145	27218.6	16106.6	26185	6067.88	12226.4	10723.8	11721.3	11351.4	17687.7	28522.5	16918.7
1668.78	13784.3	23647.3	4958.2	10608.6	10525.4	14812.4	24013.8	5077.04	11535	10681.6	15056	24925.3	5333.15	11816.4	10734.8	5232.86	11953.8	11146.5	16337.8	26201.8	16125.9	26064.9	5346.57	12595.1	11044.2	12016.8	12190	17351.5	26336.6	17197.5
1667.94	13571.1	23367	4883.1	10556.3	10425.6	14024.7	25192.3	5077.74	11021.9	10736.6	15413	26576.2	5132.18	11762.6	11117.2	5415.21	11867	11495.3	16005.7	27146.1	16755.2	27663.1	5288.74	12360.7	11717.7	12989.2	12063.5	16965.5	27509.1	17261.9
1667.1	13856.8	23315.5	5045.6	10414.9	10382.2	14309	23982.3	5274.35	10866.8	10977.3	14884.1	25115	5768	11806.1	11149.3	5298.25	11459.6	11329.4	15785.6	25940.7	15254	26393.7	6074.41	12712.8	11867.3	11601	12130.9	16183.8	28453.9	15361.2
1666.26	13682.3	23560.9	5026.93	10528.9	10537.8	14634.5	23809	5219.68	11126	11392.4	14936.2	25996.8	5420.18	11813.7	11638	5329.26	11177.6	11632.1	16306.7	27329.9	16421.3	27672.1	5703.63	12500.5	11732.7	11328.6	12709.1	16889.3	29874.6	17609.6
1665.42	13525.6	23464.9	5034.98	10660.7	10539	14822.4	25258	5524.28	11109.3	11054.6	15237.6	27434.4	5897.15	12051.1	11656	5694.18	12044.1	11579.1	15943.9	28653.1	15604.3	29865.5	6363.46	12777.3	12044.9	13094.3	11591.1	17453.9	29623.1	15956.9
1664.57	13784.5	23579.6	4992.56	10641.1	10439.3	14730	23916.5	5375.1	10831.4	10935.2	15204.4	25095.4	5418.44	11412.3	11997	5466.61	11566.8	11915.9	15732.5	27275.9	16339.8	26846.9	5639.14	12454.4	12503.8	12196.4	13038	16478.7	29819.3	17107.2
1663.73	13942.4	23450.9	5024.36	10761	10419.7	14973.2	24553.6	5043.71	11180.6	10947.3	15408.3	26210.7	5215.28	11967	11046.9	5530.36	12287.1	11543	15660.2	28357.2	16803.1	26878.8	5639.07	12070.9	12072.6	12819.2	11998.2	16708.4	28926.1	17011.9
1662.89	13702.6	23446.9	4987.89	10759.1	10637.5	14324.1	24655.8	5137.68	11171.2	11022.7	15210.9	26321.5	5155.31	11233.6	11924.2	5598.79	11487.5	11841.6	15808	27133.8	16318.6	27090	5603.48	11355.2	12705.9	11766.7	12523.1	15843.1	27731.3	17243.3
1662.05	13999.9	23926.5	5040.44	10692	10677.2	14923.4	25570.8	5233.48	10916.5	11146.8	15898.6	26607.9	5368.28	11315.9	11697.4	5245.42	11023.7	11700.5	17163.1	28148	17083.5	28361.7	5558	11507.3	12681	11182.4	12105.4	18210.4	29383.5	18129.7
1661.2	13935.2	23741.5	5128.57	10788.1	10930.5	14223.9	25714.8	5376.88	10989.4	11536.6	14343.3	26398.8	5434.99	11326.6	12488.2	5530.79	11216.3	12520.2	15288	26726.7	15750.6	27248.3	5932.94	12433.2	13681.4	11719.5	12797.4	16572.3	27510.6	16150.1
1660.36	13971.4	23814.6	5095.07	11106.5	10881.1	15191.4	25982.5	5307.76	11510.1	11376.4	15840.5	26084.2	5416.79	12322.1	12084.6	5519.19	12080.1	12078.7	16754	27615.8	15923.2	26269.1	5880.9	12838.2	12281	12471.1	12612	17762.3	29177.4	16811.5
1659.52	13960.1	23819.4	5168.33	10986	11095.8	14944.7	23896.3	5673.07	10996.2	11785.2	15486.3	25719.7	6019.9	11141.4	12507	6030.02	11908.6	12574.6	16716.3	27904.8	16087.2	26302.4	6327.2	12208.4	12765.7	12922.6	13677.4	17350.8	29750	16501.1
1658.67	13907.3	23640.4	5143.73	10969.3	11022.7	14915.4	24253	5373.34	11355.8	11744.6	15521.1	25632.8	5688.42	11519.7	12450.6	5521.34	12303.2	12743.5	16825.6	27956.6	15862.7	26401.7	5738.63	11917.1	13506	12939.2	13757.7	18199	29024.5	16818
1657.83	14065	23858.7	5160.64	10854.8	10774.8	15000.9	24526.9	5447.62	11455.7	11661.6	15185.3	25208.1	5825.56	11985	12807.3	5657.29	11906.8	12382.6	16394.8	25766	16655.4	27700.8	6395.49	13024.8	12852.1	12890.4	12888.3	17170.3	27775.4	17459.1
1656.99	14092.3	24148	5070.85	10921.1	11116.7	14456.1	25533.6	5507.95	11222.1	11539	14730	26477	5626.07	11593.7	11827	6033.13	12023.6	11833.1	15963	26973.1	14931	27503.1	6142.56	12145.3	12382.8	12539.9	12846.7	16346.8	27485.8	15954.5
1656.14	14092.8	24167.6	5037.39	11147.4	10951.9	14201.8	25786.3	5386.88	11822.1	11025.8	14545.3	28024.8	5444.44	12795.9	11940	5527.58	12221.6	11701.6	14796.7	28207.9	14589.6	30184	5909.44	12972.8	12335.8	12340	11804	15106.2	30504.4	15134.4
1655.3	14123	24302.7	5107.63	10988.5	11068.5	14390.9	25338.8	5490.97	11918.3	11516.6	14696.8	26321.3	5492.22	12905.4	12127.2	5751.32	12650.8	12558.6	15800.7	28445.4	15564	26837.3	5910.1	13993.4	12696	13851.7	13078.5	16738	30702.3	16456.3
1654.46	14082.1	23848.3	5100.84	10897.8	10900.7	14404.6	25864.9	5539.62	10954.6	11221.4	14649.2	28259.6	5676.58	11681.7	11720.3	5587.05	11928.3	11322.5	15368.6	29703.1	15093.4	30138.7	5804.04	12384.2	11967.4	12713.6	11602.3	15426	31680.4	15416.2
1653.61	14032.3	24131.6	5239.16	10848.5	10685.6	14650	24415.7	5558.41	11664.8	11154.1	15120.2	24741.5	5938.31	12149.6	11917.5	5911.03	12089.5	11433.8	16146	26462.3	15833.4	27051.5	6364.97	12392.3	12727.7	12630	11730.3	16451.5	27004.9	16245.5
1652.77	13941.1	23852	4974.73	10905.9	11030.3	14038.7	25968.7	5181.77	11554.7	11668	14324.8	26228.1	5337.64	12543.4	11710.2	5314.77	12605.4	12509.7	15057.3	27870	15177.9	26743.3	5833.16	12796	12855.6	13815	12826.8	15957.2	30277.6	16386.7
1651.92	13900.2	23623	5044.93	10951.4	10818.2	15048.5	24403.6	5415.78	11490.8	11328.1	16108.1	25829.6	5557.36	12126.6	12029.4	5934.75	11847.6	11543.8	16623.9	28166.6	16688.3	26251	5598.49	12684.1	12241.8	12290	11979.9	17189.5	29362.9	17300.9
1651.08	13758.7	23580.5	5047.03	10887.4	10558.8	14929.3	24513.3	5078.72	11489.1	10595	15547.9	26899.9	5512.1	11642.4	11243.1	5115.84	11958.2	11153.3	16037.2	27044.6	16203.1	27651.8	5602.08	12612.8	11549.8	12466.4	11990.5	16213.5	27659.9	17266.9
1650.23	13975.4	23783.6	4930.75	10506.7	10645.8	14911.4	25375.4	5119.5	11247.5	10784.9	15414.7	25422.9	5391.36	12109.7	11547	5215.38	11262.5	11680.5	15793.3	25856.5	15819.1	27685.2	5719.65	12514.4	11985.2	11494.7	11908.8	16161	26778.5	16309.6
1649.39	13866.5	23723.3	5015.72	10575.9	10425	14214.5	24541.9	5043.74	11065.8	11358.2	15292.9	26584.5	5111.29	11887.9	11378.6	5135.51	11881.9	12039.8	15802.8	27303.1	15496.2	28727.9	5468.74	12846.1	11794.1	12247.8	12704.8	17048.3	27771.1	16249.5
1648.54	13568.2	23331.7	4914.27	10432.1	10248.7	14562.1	25597.5	4978.74	10467.7	10810.3	15318.4	26894.8	5275.67	11137	11764.6	5314.53	11219.9	11572.7	16000.2	28251.3	16029.3	28750.3	5496.81	12096.4	12642	11243.6	11729.9	16917.2	28536.9	17529.9
1647.7	13672.4	23283.3	4904.56	10510.2	10258.7	13878.7	24117.6	5114.25	11300	10408.2	14558.2	26496.6	5539.83	11500.2	10539.9	5588.08	12011.8	11022.4	15560.5	29036.5	14774.1	26982.2	5867.3	12582.1	10653	12917.2	11038.8	15932.9	31480.8	15530.2
1646.85	13566.6	23374	4942.17	10254	10245.2	14251.9	25269.9	4971.93	11056.9	10481.8	14976.4	25420.9	4999.19	11189	10955.4	5101.36	11696.3	11392.5	15445	27535.1	15249.2	26502.7	5405.45	12243.7	11774.9	12719.1	12016.1	15514.9	28173.5	16490
1646.01	13437.1	23145.3	4902.88	10252.3	10213.8	14181	23598.6	5313.51	10689.4	10972.9	14618.9	25055.7	5347.31	11208.9	11545.8	5590.73	10953.6	11833.6	15988.4	27511.1	14872.6	27267.3	5403.68	12164.3	12430.7	11739.1	12060.4	17309.4	27953.8	15742.2
1645.16	13597.4	23002.4	4851.78	10312.6	10297.8	14802.9	24717.5	5047.57	10324.5	10829.4	15611.6	26474.6	5277.01	10655.4	10858.2	5437.91	11221.2	11297.5	16908.8	28330.1	17054.4	26744.8	5574.81	11486.7	11293.1	11678.3	12379.9	17030.2	30520.8	17210.3
1644.32	13299.5	23072.3	4951.46	10038.9	10050.7	14208	23752.8	5289.04	10240.2	10804.3	14280.2	25645.9	5615.13	10551.9	11487	5767.68	10877.4	11113.3	15137.1	26455.1	14955.6	27005	5850.06	10665.3	11973.5	10983.4	11634.7	16609.9	27409.3	15817.2
1643.47	13196.7	22764	4850.12	10025.4	9983.99	14482.3	23856.5	5124.13	10274.8	10391.6	14927.3	24559.9	5523.76	10927.9	10451.4	5329.6	10333	10965.2	16041.5	26392.3	14949.2	26587.8	5843.81	11251.8	11412.1	11078.6	11404.6	16208.7	28638.2	15905.8
1642.62	13466.3	23129.5	4934.99	9858.17	9952.73	13807.3	24114	5227.57	9986.56	10857.8	14475.4	25985.9	5745.61	10503.5	10947.3	5479.15	10946.6	11358.3	15007.6	27012.8	15549.9	28322.9	5805.75	11039.8	11274.1	11322.3	12405.7	15516.7	28142.6	16591.5
1641.78	13319.3	23025.1	4945.97	10060.3	9847.62	14248	25115.7	4969.02	10669.4	10433.3	14441.4	26899.5	5012.96	11485.6	10985.7	5296.51	11421.2	10954.3	15345.7	27975.6	14950.6	29121.8	5316.59	12114.6	11806.9	12161.3	11186.8	16425.3	29194.1	15900.4
1640.93	13269.7	22917.7	4732.43	9775.04	9795.72	14529.1	23872.4	4911.66	10223.8	10424.3	15224	23991.9	5274.47	10662.7	10658.3	5296.34	10935	10924.7	15992.9	26388.7	15989.2	25380.8	5367.12	10939.3	11005.4	11431.8	11938.1	16818.5	27188.9	16942
1640.09	13075.5	23099.9	4820.23	9758.6	9850.16	14086.3	25325.9	4888.39	10633.7	10640.7	15000.6	26163.9	5326.79	10859.5	11523.7	5190.41	10882.2	10690.7	15431.2	28264.5	15950.6	27702	5363.55	10869.2	11604.2	11666.5	11457.1	16648.7	30002.1	16084
1639.24	13333.1	22836.1	4816.45	9886.87	9863.24	14657.9	22936	4873.63	10785.1	10779.2	15846.6	23890.2	4992.19	10971.3	11486.6	5135.61	11447.1	11351.7	16046	25579	16309.2	26043.8	5301.73	11110.8	11980	11600.9	11641.2	16395.7	25621.5	16946.4
1638.39	13354.4	23044.8	4880.59	9660.78	9867.46	14550.7	23199	4974.9	9997.52	9923.94	15017.2	24140.1	5107.56	10058.3	10811.6	5317.25	10800.6	10173.3	16097.1	24505.6	15088.5	24896.3	5520.5	10358	11708.7	10881.1	10256.6	16389.4	25381.8	16519
1637.55	13086.5	22893.2	4797.09	9827.4	9856.92	13513.7	24394.9	5245.22	10570.3	9920.45	14769.7	25683.5	5760.2	11259.3	10269.7	5735.01	10791	10041.9	14799.2	25774.6	16227.4	27823.5	6211.89	11849.5	10334.5	11597.7	10873.2	16030.4	26051.7	17188.7
1636.7	13101.9	22880.4	4790.37	9701.76	9805.06	13916.1	23102.7	5253.55	10332.6	10508.5	14795.8	24233.7	5749.6	10966.1	10937.1	5285.9	11061.8	10847.4	16176.9	26007.4	15794.7	24497.5	6088.24	11836.4	11831	11345.3	11049.9	16491.2	27793.8	16545.2
1635.85	13067.2	23000.5	4733.48	9776.83	9779.78	14084.6	24646.7	4863.51	10345.8	9937.22	15469.2	25062.2	5160.62	10577.9	10654.2	4975.06	10359.6	10293.7	16025.5	26673.6	16346.9	25637.2	5393.22	11145.9	10826.7	11266.5	11218.3	17289.7	27602.2	17299.7
1635	13271.6	23017.2	4791.68	9716.14	9671.89	13792.3	24235	4929.43	10612	9923.45	14291.4	25666.1	5193.24	10666	10262.1	5415.03	11338.4	10061.4	15182.1	25923.3	15071.3	28034.9	5481.82	11537.5	10923.8	11342.2	10652.7	15625.7	28098	16557.6
1634.16	13033.3	22939.5	4758.42	9717.43	9885.59	13626.7	24324.1	5045.12	9987.31	10460.1	14373.3	26212.1	5251.79	10856.5	10681.8	5387.22	10442.9	10844.6	15505.9	26434.7	15110.1	27969.6	5494.75	11093.9	11313	10576.8	11468.2	16961.4	28582.6	16035.2
1633.31	13078.2	22755.7	4571.78	9701.02	9535.85	13299.2	23493.4	4922.05	10471.5	9743.92	14465.4	24974.9	5325.79	10500.4	10476.9	5289.5	11444.6	9791.34	14968.1	26952.2	15668.3	25829.4	5379.58	10882.6	10724.1	12281.2	10115.7	15577.5	27712.6	16276.1
1632.46	13014.1	22984.8	4683.06	9540.12	9475.24	14226.8	24367.9	4966.22	10394	9690.69	14716.8	26645.9	5065.69	10897.7	9815.94	5131.42	11353.4	10004.8	15121.4	28331.3	16123.7	26813.6	5161.04	11444.1	10209.1	11477.5	10856.9	15808.2	29258.9	16645.2
1631.61	13221.2	22762.6	4717.64	9600.41	9650.53	13836.4	23358.7	4933.76	9804.66	9778.86	14634.1	23384.6	4966.13	10367.9	10722.4	5048.67	10177.2	10567.6	14774.7	25583.2	15635.6	23491.8	5132.74	10623.3	11462.8	10853	10835.2	15554	26067.3	16879.6
1630.77	12997.8	22797.1	4728.63	9469.05	9648.88	13729.5	22808.8	4839.5	9953.27	10254.9	14892.9	24747.1	5097.04	10157.3	10620.6	5073.75	10859.5	10927.1	14919.2	26671	16033.3	25123.4	5448.37	10426.1	11090.6	11821.7	11001.6	15683.3	29201.4	16111.6
1629.92	13137.1	22787.3	4645.29	9664.92	9544.07	13245.3	24914.7	5043.6	10601.1	10159.3	14121.4	26867.5	5116.19	11334.2	11164.4	5473.92	11377.3	10315.1	14130.9	27289.9	15391.2	28866.7	5176.31	12466.4	11181.2	12002.6	10635.1	14500.1	28092.8	15490.1
1629.07	12916.8	22857.1	4765.32	9733.99	9424.56	13622.1	23944	4955.55	10681.4	10005.1	14570.8	26168.6	5265.84	11215.7	10527.1	5442.03	11699.2	10327.1	15018.6	27655.6	15149.1	27254.6	5789.84	12257.4	11481.3	12503.9	10700.9	15302.4	30253.7	15657.1
1628.22	13082.5	22882.6	4897.1	9375.8	9658.67	13863.7	24866.6	5182.84	9647.13	10470.2	15074.9	26305.2	5460.59	10550.4	11309.4	5458.19	10493.1	10537.5	16510.6	28519	15873.2	28195.4	5549.77	11319.5	11538.2	10697.4	10982.5	17103.3	30556.8	16206.7
1627.37	12874.1	23011.3	4751.91	9692.37	9545.07	13218.2	24503.1	4800.37	10240.4	10240.3	13542.2	25931.1	5149.14	10888.8	10648.6	4891.52	11001.2	11203	14848.7	26855.6	13943.5	26361	5569.6	10905	11610.2	11662.5	12207.3	15881	28928.5	15267.6
1626.52	13245.9	22921.9	4768.77	9519.87	9558.16	14293.5	24206.7	5202.49	10302	10437.3	14577.3	24246.9	5658.9	10468	10871.9	5578.71	10935.1	10983.8	14605.2	26201.9	15638	24964.1	5995.47	11291.6	11844.5	11716.8	12010.8	16052.6	28685.8	16438.4
1625.67	12913.8	22750.1	4776.79	9712.61	9544.75	13802.8	23897.8	4985	10384.5	9622.13	14569.1	25991.6	5465.26	10520.6	10076.2	5423.04	10960	9732.83	15999.3	27729.7	15201.3	27389.7	5703.48	11116.4	10313.5	11545.9	10298.9	17484.7	28030.8	16553.2
1624.83	13082.4	22978.9	4849.59	9719.78	9775.73	13857.3	24879.3	5184.3	10618.3	9814.37	15121.7	25415.6	5401.57	11323.9	9934.04	5438.64	11615.2	10423.7	15971	27915.2	16051.3	27762.7	5741.26	11778.6	10789.6	12507.6	10600.8	17496.9	29243.4	16803
1623.98	13091.9	22983.8	4754.55	9553.26	9464.94	13574.5	23333.6	4804.08	9729.25	9830.55	13789.7	23797.2	4957.89	9804.85	10328.8	5148.12	9758.4	10267.6	15051.5	24112.6	13810.5	26049.7	5431.8	10736.5	10490.7	10534.9	10792.8	15469	25025.3	13821
1623.13	13033.8	22882.7	4712.53	9613.44	9581.06	13853.1	23455.7	5076.66	10402	9997.31	14678.3	24246.7	5194.54	11413.2	10224.9	5139.6	10695.2	10228	14788.3	25642.9	15729.7	25316.4	5257.15	11934.7	11106.2	11020.1	10495.7	15708.7	27817.4	16791.3
1622.28	13175.7	23237.8	4679.35	9714.8	9764.83	13450.5	24915.6	4867.48	10634.8	10105.1	14746.3	26770.6	4872.13	10760.7	10174.7	5131.63	10695.1	10494.6	15732.1	28734.5	16155.1	26862.3	5141.79	11054.9	10215.3	10867.8	10559.5	17242	31200.6	16226.9
1621.43	13114.6	23086.7	4869.81	9633.69	9616.03	13469.1	24556.1	4969.27	10187.6	9699.48	13671.2	26162.7	5346.04	10898.7	10477.9	4978.75	10331.9	10631.5	15010.2	28632.8	14767.5	26776.3	5799.68	11708.6	11017.6	11101.5	11142.9	16331.3	28972.6	14993
1620.58	13124.2	23168.1	4748.35	9637.92	9887.99	13183.6	23901.8	4830.96	9909.12	10728.7	13754.4	25187.8	4999.52	10673.1	11766.2	4881.96	10363.4	11421.4	14767.8	26436.9	14608.2	26490.6	5052.45	11651.5	12443.7	10955.3	12464	15201.1	27948.7	14838.7
1619.73	12974.8	23211.2	4794.6	9733.34	9824.53	13356.7	23260	5176.14	9949.19	10563.1	14293.7	25160.5	5579.05	10524.4	10747.1	5606.5	10180.3	10606.4	15603.2	27040.4	15528.9	26259.3	6113.45	10706.1	11059.3	10518.9	11288.5	16146.9	28386.6	16993.6
1618.88	13325.5	22824.9	4846.72	9728.73	9881.67	13328.7	24864.4	5246.52	10267.3	10580.7	14097.3	26724.5	5369.17	11041.2	11362.8	5455.41	11229.8	11540.1	14928.3	27836.6	15201.5	27365.7	5418.3	11491.4	12443.3	11261.8	12621.2	15274.4	28032.5	16277.4
1618.03	13320.3	22935.7	4790.02	9738.83	9753.53	14476.3	23457.3	4973.38	10039.4	9911.79	14884.9	23561.3	5056.21	10272.4	9917.17	5355.85	10746	10324.8	14976.4	23605.7	15546.3	25758	5260.82	11211.8	10381	11604	10763.7	15291	24755.2	16179.6
1617.18	13115.2	23378.6	4989.12	9619.57	9831.24	14167.3	25000.6	5367.05	9994.87	10362.5	15577.2	27357.8	5399.09	10530	11248.2	5569.24	10979.9	11305	15757.2	29192.6	15944	29951	5404.36	10925.8	11625.8	11964.6	12326.5	17052.1	30702.3	17173.7
1616.33	13286.4	23139.4	4761.93	9591.46	9717.86	13511.9	23570.4	4918.02	9807.85	10096.6	13831	23626.2	5372.79	10444.7	10930.8	4970.09	10554.2	10443.4	14232.3	25784.4	14550.1	24539.4	5727.52	10647.6	11755.3	11088.9	11456.7	14380.6	28006.4	15832.7
1615.48	13460.4	22915.1	4687.64	9780.86	9695.63	14128.1	24796.9	4706.88	10627.4	9759.11	15236.9	24839	5012.54	10782.1	10402.1	5099.51	10946.3	9803.78	16250.5	26998.3	15244.3	25728.4	5198.84	11834.7	10954.4	10950.6	10320.4	16301.2	29093.6	15692.5
1614.63	13164.3	22920	4963.05	9764.49	9711.6	13320	23750.6	5071.82	10522.4	10444.5	14247.7	26045.7	5148.4	11560.7	10696.6	5427.33	11008.7	11005.2	15510.8	26414.8	15472.7	27172.2	5379.24	11575	11565.5	11248.1	11801.1	15668.2	29016.8	15579.6
1613.77	13203.2	23204	4780.05	9680.55	9780.44	13450	24768	5033.65	9978.09	10404.2	14113.1	25357.3	5075.96	10034.4	10694.8	5477.47	10846	10478.6	15326.8	27578.1	14349.2	27003.8	5570.61	10669.2	11093.6	11435.1	11366.2	16338.2	29480.4	14823.7
1612.92	13262.6	22988.5	4767.48	9784.65	9843.39	14425.7	24628.5	4937.58	10597.3	10620.8	14454.8	25529.9	5126.38	11298.7	11305.3	5355.57	11635.3	11060.5	15090.1	27808.2	15119.3	27404.2	5449.62	11460.6	11626	12726.3	11746.4	15157.2	29078.2	15426.2
1612.07	13398.4	23093.2	4801.91	9445.22	9683.11	14137.7	23921.7	5121.07	9768.84	10455	14144.8	25578.7	5606.13	9920.01	11058.9	5448	10200.1	10711.6	14931.5	25707.6	14366.2	27074.9	5842.54	10014.1	11093.4	10791.8	11046.2	16312	25735.2	15345.4
1611.22	13360.8	22786.8	4812.83	9834.15	9816.53	14233.3	23643.1	4835.64	10172.3	9866.92	15644.3	24164.6	5162.85	10588.6	10686.6	5058.97	10545.1	10068.8	16573.1	24888.9	15960.5	24862.7	5520.05	11167	11051.5	10569.4	10483	17007.4	26972.2	16966.3
1610.37	13109	23331.9	4914.77	9706.22	9638.69	13563.1	23550.4	5349.8	9771.4	9705.87	14644.5	24383.2	5375.14	10352.8	10381.2	5728.13	10435	10016.6	14685.6	24535	15444.2	26493.6	5572.31	10918.2	10997.3	10708.9	10553.2	16087.1	24585.2	15858.3
1609.52	13127.3	23134.2	4790.64	9634.11	9763.27	14166.3	25098.2	5056.4	10557	9985.3	15560	25578.6	5296.13	11426.8	10345.4	5519.72	10830.3	10715.6	15814.6	26838.1	16099.3	26406	5662.9	12363.4	11157.6	11425.7	11305.1	16268.2	27821.4	17028.4
1608.67	13348.1	23291.6	4701.77	10031.6	9790.95	14188.1	23580.4	4909.16	10496.3	10016.8	15557.7	25778.2	5005.1	10731.9	10858.6	5107.2	11377.3	10449.8	16499.6	25977.2	16611.6	27831.6	5130.15	10926.4	11505.2	11789.3	11170.2	16812.3	27118.2	17040.2
1607.81	13190.3	23096.9	4780.19	10038.7	9830.35	13661.9	23850.7	4797.06	10063.2	10086.1	14755	25450.5	5141.88	11058.6	10679.2	4995.99	10931.5	10404.8	14783.9	27908.5	15593.2	27784.3	5572.09	11651.7	11186.3	11701.5	10680.6	15442.7	28301.7	16882.7
1606.96	13179.2	23128.2	5031.69	9849.2	9922.55	14282.3	23874.2	5251.51	10408.2	10494.6	14640.5	26148.2	5464.01	11325.8	10763.3	5299.36	10428.4	11009.1	15910.5	27665.8	14776.9	27212.4	5608.4	11438.2	11582.9	10690.4	11625.1	16142.6	29559.4	15364.7
1606.11	13502.6	23259.1	4878.29	9715.51	9736.05	14695.8	23781.6	5018.99	10600.1	10349.9	15022.6	24713.1	5239.68	11379.8	10981.5	5203.5	11484.2	11275.3	16409	25270.1	15860	26284.1	5550.17	11798.2	11812.2	11979.2	11388.2	16607.7	26376.6	17376.7
1605.26	13512	23102.7	4833.46	9927.95	10065.8	13850.4	24503.5	4872.95	10022.1	10836.9	14755.2	26086.6	5096.23	10490.9	11089.3	5305.72	10230.2	11454.4	16032.5	26276.8	15517.9	27593.6	5469.03	10541.7	11310.3	11158.9	12581.3	16354.8	28149.2	15797.9
1604.4	13374.8	23227.7	4750.53	9744.44	9732.71	14660.1	23940.4	5070.06	9749.77	10338.5	16020.8	25919	5374.71	9877.66	10441.9	5322.36	9800.2	11150.2	17616.9	26950.2	16114.3	28387.7	5468.23	10756.6	11405.1	10209.1	11244.8	19150.5	28233.8	16393.7
1603.55	13313.9	23168	4858.19	9678.27	9754.5	13814.1	25117.6	5289.23	10260.5	10317.2	14083.6	27269.3	5679.91	10369.6	11079.4	5355.77	10817.7	10606.2	14403.5	27753.7	15465.3	27796	6166.29	10558.3	11429.7	10890.3	11471	15051.7	28643.1	15835.1
1602.7	13071.2	23407.4	4851.5	9849.56	9887.67	14132	24598.6	4965.13	10041.9	9925.32	14326.5	24972.5	5457.04	10869.8	10437.5	5394.91	10216.1	10310.1	14476.3	26224.5	14839.3	25098.5	5585.24	11098.2	10965.5	11024.9	10656.5	15166.7	27112.5	15050.5
1601.85	13241.9	22790.8	4874.11	9443.41	9780.47	14526.6	22827.1	4985.98	9638.26	10159.8	15629	24018.8	5093.36	10122.4	10402.4	5024.88	10509	11083.1	16073.2	24178.9	17032.5	25513.2	5112.93	10442.1	11151.2	10577.1	11986.7	16817.9	26129.7	17623.2
1600.99	13274.8	23179.6	4843.97	9682.09	9875.49	14444.3	23228.5	4933.72	10513.2	10445.6	15407.6	25062.5	5100.57	11072.7	11191.9	5416.77	11191.1	11391.9	16797.9	25525.8	16845.1	26303.8	5319.87	11124.2	12261.9	12109.3	11837.2	18140.4	26098.7	18360.4
1600.14	13237.3	22856.2	4775.76	9633.55	9668.71	13412.9	23251	5084.74	10283.6	10259	13479.7	23270.8	5558.01	10340.6	10464.8	5472.22	10840.2	11127.8	13824.7	24755.1	14804.7	24020	5653.64	11149.2	10861.5	11180.7	11559.4	14448	26834.9	16192.3
1599.29	13355.2	23098.4	4695.84	9593.82	9611.39	13523.4	23647.2	5041.51	9808.78	9969.68	14733.9	25820.7	5149.76	10467.9	10229.3	5147.75	9853.46	10675.7	15845.2	25935.5	15239.3	28268.3	5528.53	11246.4	11228.7	10336.5	11041.6	16104.4	26854.8	16622.8
1598.43	13206.4	23235	4762.4	9615.6	9565.81	13617.6	24589	4907.52	10035.3	10373.6	14405.3	26133.9	5341.05	10440.6	11358.8	5366.46	10182.2	11093.7	15043.5	27785.6	15705.1	26733.8	5684.93	10774.6	11537	10373.1	12139.8	15964.2	30345.7	16417.3
1597.58	13119.3	23046.5	4761.59	9555.39	9543.67	13345.3	23320.8	5048.62	10031.4	9545.12	13760.1	24037.8	5333.36	10231.8	10198.9	5205.67	10674.5	9900.29	14304.2	24684.1	14809.7	26133	5379.14	10851.3	10646.4	10973.4	10864.7	15003.8	26017.5	14887
1596.73	13146.3	23317.8	4980.36	9641.59	9732.35	14258.2	23555.2	5259.45	10385.1	9983.11	14843.6	25491.1	5773.33	10625.6	10860.2	5734.08	10555.7	10917.6	15908.4	27416.4	16250.2	26405.8	6252.8	10926.8	11128.8	10610.5	11583.1	16716	29029.9	17734.4
1595.87	13097.2	23161.6	4765.81	9754.1	9637	14253.9	24064.1	4899.92	10131.3	9717.82	15103.2	25430.6	5216.02	10568.1	9994.11	5024.54	11022.3	10057	16414.3	26865	15931.4	26252.3	5706.96	11126.3	10313.2	11472.7	10412	16790.9	29328.1	16450.8
1595.02	13250.1	23204.5	4870.36	9629.5	9731.94	14026.7	24093	4925.28	10096.9	10047.2	14182.7	25666.8	5376.73	10787.1	10940.4	5388.76	10800.7	10650.4	15019.8	25996.3	15236.9	26271.5	5439.11	10820.3	11520.2	11879.9	10951.1	16447.6	27763	15413.6
1594.16	13341.4	23130.2	4749.54	9627.85	9633.7	14423.9	25430.4	4857.41	10243.2	10083.9	14789.9	27124.4	5013.11	11219.1	10700.6	5341.58	11257.6	10278.7	15922.4	29359.6	15531.5	29006.3	5091.92	11789.6	11689.4	12371.9	11046	17095.4	30773.2	15611.2
1593.31	13149	23158.5	4760.43	9371.64	9515.01	13778.2	24836	4870.51	9892.4	9854.59	13939.1	26426.6	5204.44	10250.8	9932.87	4882.72	10795	10166.1	15294.4	28684.8	15049.8	26582.6	5288.02	11256.2	10871.7	10843.4	10660.5	16706.1	28970.4	15536.1
1592.45	13108.7	23142.8	4753.77	9592.37	9729.86	13338.1	24693.9	5184.35	9951.63	10358.5	14051.6	26507.2	5380.87	10092.6	10441.3	5221.41	10904.7	10912.8	14828.6	28168.5	15165.5	28103.3	5819.5	10382.8	10475.4	10974.8	11101.2	15903.1	28520	16024.7
1591.6	13106.4	23334.8	4834.85	9508.83	9719.42	13900.6	24909.9	5287.94	9742.58	9881.19	14970.5	26710.4	5673.24	9858.08	10260	5558.41	10340.2	9928.37	15632.3	27511.2	15074.8	26936.6	6137.63	9953.17	11065.1	11129.4	10450.3	16866.3	30006.8	16543.7
1590.74	13083.7	23210.9	4848.64	9413.61	9749.92	13131.9	23782	5150.27	9664.04	10662.8	13830.4	24284.2	5451.73	9954.07	10822.9	5190.36	9694.81	11639.4	14248.2	24310.8	15196.9	24378.7	5494.1	10292.7	10947.8	10596.2	12737.5	15603.7	26622.2	16589.4
1589.89	13131.2	23297.5	4827.34	9482.17	9783.33	14029.3	25102	4939.48	10007.6	10517.5	14178.1	26337.2	5421.93	10228.6	11131.3	5020.79	10857.2	11241.4	15546.3	26360.6	15308.1	27172.8	5766	10316.1	11999.2	11927.2	12181.4	16561.6	27742.9	15999.2
1589.03	13128.9	23223.4	4849.9	9609.18	9626.72	13394.8	25221.5	5253.44	10521.4	9652.11	14319.4	25282.9	5492.6	11183.2	10169.1	5515.85	11236.5	10185.6	15143.8	25909.6	15244.7	27218.8	5593.57	11329.3	10921	11429.8	10838.2	16484.3	27862.9	15871.1
1588.18	13275.7	22944.7	4892.91	9642.6	9899.82	14070.1	24793.9	5038.99	10227.1	10080.4	15362.1	25385.5	5156.43	10976.7	11011.8	5232.32	10691.5	10313.1	15842.8	25658.8	16010.6	26159	5334.25	11943.8	11487.3	11585	10958	16845	27751.9	17446.6
1587.32	13369.9	23019.6	4997.28	9459.76	9614.65	13771.4	24815.2	5029.39	10317	9822.36	15099.2	25456.2	5528.94	11265	10302.1	5468.48	11059.8	10427.2	15984.7	26347	15709.4	25914.8	5658.55	11675.1	10611.2	11355.6	11111.4	16688.8	27965.8	15800.9
1586.47	13090	23258.2	4797.73	9797.08	9750.33	13509.1	25119	4942.74	10420.2	10012.6	14713.6	27518.5	5415.23	10485.4	10931.2	5008.21	10682.1	10887.9	15217.7	29361.6	15699.3	29934.9	5463.91	11344.3	10931.8	10711.1	10986.2	15888	29611.3	16080.2
1585.61	13149.1	23458.7	4966.35	9520.78	9684.38	13543.8	24305.6	5317.49	9966.53	9988.86	13791.2	25571.4	5395.95	10189.9	10651.4	5807.38	10283	10125.1	14959.1	27729.8	15121.1	28039.6	5770.85	10836.1	11423.1	10543.9	10356	15811.2	28707.8	16174.4
1584.76	13272.5	23437.1	4819.45	9606.78	9855.05	13448.2	23497.8	5196.18	9795.68	10642.5	14070.7	24596.3	5397.71	10220.6	10763.3	5608.05	10393.5	11662.6	14619.2	25852.4	14831.8	26286.2	5875.42	10501.7	11837.3	10833.3	11998.6	15142	27382.3	16173.7
1583.9	13427.9	23485.7	4882.88	9812.48	9964.34	14036.4	23735.1	5215.84	10082.5	10692.6	15276.2	25619.6	5455.06	11003	10752.2	5433.26	10640.6	11323.3	16090.9	26016.5	16490.7	25849.3	5811.86	11082	11033.3	11341.2	12397.5	17493.9	27781.7	16604.7
1583.04	13265	23332.8	4858.68	9787.43	9769.91	14031.2	24087	5176.73	10093.9	10670.8	15169.1	26085.2	5399.57	10506	11320.7	5666.39	11093.2	11424	16459.5	28037.7	15986.4	26371.9	5531.5	11078.7	11351.4	11109	11850.1	17775.6	29952.4	17280.9
1582.19	13178.1	23343.3	4878.28	9499.65	9785.75	14466.5	23970.8	5044.74	10186.2	9889.78	14519.3	24122	5440.41	10379.8	10861	5274.76	10239.9	10812.3	15826.6	25348.6	15852.2	25451.8	5948.75	10912.6	11649.1	10972.3	11187.3	15868.2	25732.9	16025.4
1581.33	13219.6	23634.1	4804.47	9611.86	9728.62	13277.6	25872.2	5024.04	9738.31	10411.9	14392.2	27316.8	5228.1	9949.31	11008.6	5346.4	10541.8	10577.6	15083.6	28973.7	15165.6	28673.6	5359.75	10361.4	11458	11461.6	11435.5	15596.5	31722	16663.1
1580.47	13304.9	23049.3	4815.32	9683.17	9750.29	14458.2	25134.8	4926.22	10121.4	10068.3	15318.1	26005.6	5255.89	10736.7	10095.6	5341.93	10798.3	10496.7	15992.4	27190.5	15965.4	28014.5	5290.38	11414.5	10558.1	11774.9	11130	17430.5	28345.1	17307.8
1579.62	13495.2	23430.5	4907.87	9678.59	9719.44	14250.1	25357.4	5349.42	10239.2	9844.63	15207.6	26954.7	5442.04	11086.2	10763.3	5527.71	10597.6	10702.6	16085.4	29197.5	15991.2	28344.8	5818.33	11877.1	11796.7	10618.9	10988.2	17014.9	30865.4	17009.1
1578.76	13434.5	23064.8	4790.33	9866.56	9825.71	13558	24127	4927.73	10225.9	10232.9	13823	25292.2	5310.66	10574.4	10348.7	5229.6	11188.2	10592.9	13930.5	26511	14081	26849.6	5567.71	11136.1	11207.9	11656.2	10832.5	14352.5	27525.7	15355.3
1577.9	13773.5	23495.4	4903.26	9628.6	9853.2	14647.3	23855.7	5201.22	10233.6	10639.4	15833.5	26002.6	5300.68	10292	10963.9	5380.61	10312.9	11436.4	15913.2	26053.6	15922.9	28110.7	5769.02	10640.7	11242.3	11274.5	11920.7	16007.9	26534.3	16279.1
1577.05	13313.2	23325.1	4774.1	9892.33	9898.17	14505.5	25333.9	4990.94	10430.3	10176.5	14981.8	26472.7	5463.8	11362.9	10598.2	5207.11	11198.7	10831.3	15708.4	29109.9	16374.6	26789.1	5877.15	12084.3	11054.8	12186.4	11047.7	15871.4	30115.5	17448.4
1576.19	13596.7	23650.6	4881.17	9832.32	9948.95	14606	24199.6	5270.12	9904.04	10038.7	14865.1	26119.3	5503.69	10040.9	10945	5709.33	10101.7	10170.9	16274.1	28170.5	15230.1	27871.3	5761.7	11037.2	11340.3	10216.5	11104.6	17197.1	28752.2	15559.3
1575.33	13364.1	23133.5	4976.54	9801.48	9801.48	13410.4	25245.1	5258.74	10310.5	10630.8	13742.9	27272.1	5356.06	10516.3	10868	5617.67	11164	11384.1	14002.1	28952.4	13828.9	27643.6	5402.99	11332.6	10947.3	11540.1	11507.5	15054.5	29044.1	13934.9
1574.47	13682.4	23365.6	4902.81	9791.05	9907.64	14387.9	24957	4940.08	10719.1	10775.3	14562.1	26691.4	5171.66	10816.5	11516.7	5193.02	10779.3	11766.8	15995.7	27026.3	15733.9	26767.9	5216.82	11474.6	11906.1	10956	11998.8	16664.7	28874.2	15830.8
1573.62	13493.5	23294.6	4811.62	9824.34	9873.88	14163.9	24648.5	5250.23	10781.8	10739.3	15472	26106.3	5534.6	11753	11749.3	5331.05	11767.6	10875.9	16350.6	27298.2	15832.5	27093.9	5560.27	12917.3	12707.4	12160.8	11343.7	17832.9	28409.6	16382
1572.76	13666	23188.6	5046.82	9770.2	9723.58	14168.7	24833.8	5452.01	9815.98	10384.8	14343.2	26469.8	5484.13	10232.7	10878.7	5677.59	10340.1	10446.2	15571.7	27868.6	14964.6	29054.8	5584.5	10541.5	11729.7	10638	10561	16582.4	30654	16277.9
1571.9	13416.1	23458.4	4783.75	9640.34	9981.2	14339.6	24623.5	5187.11	9820.28	10721.1	15631.6	25820.9	5367.26	9827.9	11012.9	5488.08	10796.6	11598.1	15693	26773.5	16098	26150.6	5673.1	10317.3	11953.4	11870.8	12617.7	16801	27595.2	16530.8
1571.04	13370.1	23387.4	4876.14	9612.47	9967.84	13722.4	24961.3	4986.34	10311.8	10376.8	14191.2	25116.4	5065.2	10406.9	10940.3	5471.17	11243.2	11204.5	14623.4	26663.6	15111.8	26512.9	5263.19	10985	11287.7	11558.1	12249.4	14812.3	27315.2	15981.9
1570.18	13560	23735.8	4991.8	9893.31	9881.66	14112.2	26021.5	5125.2	10082.4	10025.4	14386.5	28482.4	5603.96	10102	10401.8	5529.33	10166.9	10612.8	15820.9	28878.1	14610.5	31111.4	5773.36	10548.8	11310.8	10998.8	10653.9	16561.1	29161.9	14705.4
1569.32	13359.6	23385.2	4996.77	9550.93	9912	14351.8	25399.3	5157.91	10171.4	10430.1	14518.2	26154.7	5214.36	11035.4	11276.7	5588.99	11158.8	10716.1	14867.7	27815.8	15200.4	26754.4	5459.93	11830	11405.9	12053	11668.1	16204.9	28401.5	15552.6
1568.47	13092.4	23424.9	4853.25	9709.41	9913.21	13685.9	25664.7	5163.64	10479.5	10763.8	13710	25865.1	5368.79	10909.8	11133.2	5664.38	11059.2	11443.5	14175.6	27778.5	14479.2	26383.8	5860.54	11248.4	11774.7	11399.9	11544.8	14787.9	29248.8	15424.2
1567.61	13337.6	23272.4	4898.99	9733.94	9940.61	13741.9	24107.9	5073.91	10161.3	10423.5	14882.4	24921.3	5272.36	10948.5	11078.5	5399.89	10707.3	10536.8	15840	25995.9	15733.9	26287.9	5390.97	11818.9	11415.9	11532.9	11133.4	16589	28448.8	16545.4
1566.75	13539	23294.6	4889.42	9743.91	9781.74	14685.4	24605.2	5010.52	10712.7	10664.1	15927.3	26005.2	5372.86	10999.4	11381	5450.03	11142.1	10798.1	16100	28207.4	17172.8	28509.7	5789.69	12063.8	12125.7	12232.6	11342.8	17617.7	28370.3	18500.6
1565.89	13344.7	23398.2	4882.76	9625.84	9698.59	14228.8	25484.9	5035.95	10023.4	10274.5	15506	25744.9	5396.52	10714.4	10961.3	5046.2	10530.8	11192.4	16284.2	25932	15992.1	25821.8	5424.85	11658.7	12013.3	10813.1	11488.5	17197.8	28078.2	16874.2
1565.03	13420.9	23301.1	4913.92	9539.81	10008.2	13946.6	24971.4	4964.4	10069.1	10314.4	14794.5	25343.5	5196.51	10323.7	10945.5	5252.58	11027.6	10682.3	14855.9	25476.5	15599	25354.3	5399.73	10824	11510.9	11412.3	11337.2	16173.2	25862.3	16032.8
1564.17	13284.8	23503.6	4808.36	9512	9869.79	13595.2	24755.1	5186.84	9684.18	10847	13668.2	26770.5	5482.58	9703.73	11275.5	5561.55	10632.6	11661	14918.4	28450.2	14612.8	28117.8	5702.87	10230.9	11291.5	10823.6	12010.2	15817.3	28664.4	15146.1
1563.31	13268	23144.8	4839.52	9737.21	9932.07	14585	24930.8	5227.62	10135.6	10402.2	15101.5	25085.9	5586.44	10535	10838.9	5325.65	10711.5	11334.1	16517.6	26357.4	15667.7	25492.5	5733.43	10806	11409.9	11775.2	12020.8	17499.2	27184.7	16264.9
1562.45	13163.9	23329.8	4949.19	9415.67	9691.92	13385.3	25060.3	5219.69	9602.88	9904.46	14331.6	25302.2	5553.99	10080.6	10051.1	5646.06	10300.2	10678.6	14893.9	25749.9	15591.6	25430.4	5565.88	10869.5	10547.8	10691.8	11183	16178	27235.1	16708.9
1561.59	13115.1	23474.1	4881.47	9696.07	9838.53	13513.7	23738	5125.71	9835.63	10145.2	14728.5	24112.7	5233.77	10267.6	10306.9	5575.8	10209	10583.3	16158.7	24816.2	15088.3	25067.9	5537.05	10410.1	10938.3	10662.2	11189.7	16190.4	25018.7	15182.9
1560.73	13156.5	23539.8	4959.12	9738.01	9988	13308.6	23748.7	5235.24	10550.8	10101.1	14597.1	25162.7	5514.58	11136.8	10534.4	5587.45	11315.3	10421.9	15257.8	25672.8	15095.5	26240.8	5924.58	11635.5	10998.2	11843.9	10978.4	15438	26839.7	16538.7
1559.87	13328.6	23439.9	4917.57	9695.64	9849.68	13664	25207.9	5259.26	10582.6	10637.9	13835.2	27668.5	5283.7	10987.4	10878.1	5331.49	11483.8	11365.2	14891.6	29157.1	15130.6	29737.7	5698.48	12048.5	11631.6	12510.9	12019.4	15743.6	30631.7	15437.7
1559.01	13311.8	23165.6	4751.09	9554.5	9917.73	13678.2	23646.4	5078.09	9787.41	9935.6	15041.8	25988.1	5392.59	10698.1	10046.5	5111.36	10709.9	10369.1	15950.7	26837.1	16052.6	27525.7	5423.41	11219	11003.5	11462.3	10796.9	17338.2	28407	16179.5
1558.15	13207.8	23086.1	5020.48	9666.16	9863.73	13619.2	23526.6	5437.82	10021.7	10122.2	14803.6	23820.2	5577.72	10514.5	10846.7	5491.28	10342.9	11132.6	15117.7	24041.1	15357.6	25714.2	6127.63	11401.8	11067.9	11266.4	12073.3	15879.2	24188.7	15476.7
1557.29	13507.6	23503.3	4894.7	9667.41	9882.37	13814.4	23806.4	5250.04	10613.8	10868.6	14685.1	24712.9	5598.19	11349.4	11408.2	5649.39	10842.1	11822.6	14760.9	24734.4	16130.1	26051.1	6105.69	11421.2	11780.2	11576.2	12381	15102.9	25989.3	17503.4
1556.43	13281.7	23676.4	4995.52	9825.48	9697.69	13596.3	25174.8	5362.27	10697.9	9858.66	14634	26652.6	5513.13	10814.9	10759.5	5632.18	11205.8	10741.4	15875.5	28735.3	15001.3	27044.4	5592.36	11150.9	11079.4	11756.8	11682	16634.1	29477.9	15096.9
1555.57	13299.7	23652	4910.44	9542.12	9945.76	14501.4	24128.9	5203.48	10156	10297.8	14889.1	26194.6	5633.36	10879.3	11278.3	5275.71	10526.4	10871.9	15973.8	27742.7	15105.8	28316.5	5962.32	11680	12268.1	10985.9	11708.2	17229.4	30072.3	15680.6
1554.71	13425.2	23624.7	5005.41	9787.26	9775.65	14539.3	23796.3	5454.52	10165.6	9922.54	15249.1	25602.8	5731.8	10191.2	9966.4	5691.43	10255	10650.3	15518.3	25910.8	16046.4	27175.2	6274.55	10981.2	10293	10911.8	11707.5	15646.6	27856.7	16239
1553.85	13277.7	23426.2	4943.59	9797.19	9971.36	14039.4	25002.3	5325.75	10735.3	10033.3	14511.4	26987.9	5746.56	11525.4	10143.8	5651.82	11110.8	10481	15516.3	28434.4	14606	27896.5	6193.03	12474.3	10731.2	11241.2	11334.9	16908.8	28578.5	15268.3
1552.98	13240.6	23401.8	4971.76	9615.56	9955.14	14554.9	24821.6	5139.62	9818.27	10038.3	15410.7	26453.1	5508.96	10578.9	10743	5468.3	10407.6	10840.1	16270.5	28762.6	15655.9	27362.9	5827.13	11193.9	10818.7	11404.3	11278.5	17862	29038.2	16777.4
1552.12	13041	23519.7	4944.79	9715.47	9877.98	13158.4	25029.7	5073.51	10496.2	9967.2	13995.5	26058.6	5399.77	11357.5	10126.5	5386.67	10877.7	10637	14748.1	28219	15295.7	27941.8	5666.94	11913.2	10462.4	11009.5	11394.5	15647.7	29595.9	16318.6
1551.26	13131.6	23759.4	5109.32	9618.05	9890.78	13396.9	25350.6	5208.79	9698.34	10028	14045.8	27768.4	5541.48	9959.65	10500	5613.03	10065.8	10791.4	14147.4	27974.4	15306.5	29816.8	5995.66	10613.9	10609.1	10570.4	10974.2	14175	29020.1	16558.7
1550.4	13315	23676.9	4879.27	9773.05	9773.05	14287.5	24563.5	5338.12	10511.7	9902.4	15040.9	26519.3	5407.17	10697.5	10092.5	5513.67	10607.4	10730.1	15642.3	28682.3	15931	26858.6	5573.22	11292.7	10701.3	11604.1	11495	16947	28847.3	16156.8
1549.54	13016.9	23466.9	4881.33	9548.04	9927.99	13503.5	25659	5330.37	10102.3	10113.5	13639.1	26740.1	5593.78	10687.1	10115.5	5501.56	10889.5	10357.8	13719.5	27586.3	13650.9	29030.3	6040.07	11156.5	11074.3	11937.7	11286.6	14919.2	27724.4	14548.1
1548.68	13423.5	23402	4926.89	9494.2	9801.58	14555	25086.4	5260.84	10172.2	10767.4	15961	25119.1	5504.73	11156.3	10911.9	5728.77	11160.5	10941	16350.8	26400.5	16588.7	26379.9	5531.5	11809.2	11261.6	11291.9	11932.6	17914.2	28143.3	17139
1547.81	13334.2	23334.2	4795.57	9617.24	9721.61	13522	25266	5181.93	9907.21	10216.1	14231.5	26854.3	5641.41	10809.3	10841.8	5632.09	10766.9	10874.1	15476.8	28319.5	14586.2	28670.3	5677.88	11552.1	11248.4	11011.1	10971.2	16430.7	28343.2	15841.1
1546.95	13195.7	23321.5	4902	9595.29	9835.9	13760.5	24394.2	4953.19	10241.4	10790.8	14176.1	26112.2	5312.89	10623.5	10853.4	5069.91	10333	11848.9	15584.8	27846.4	15136.6	27766.3	5446.77	10970.3	11427.7	11092.2	12717.7	16358.3	28388.9	16375.6
1546.09	13280.4	23404.4	4848.99	9550.16	9758.85	14356.4	23828.3	5081.27	9702.23	9923.83	15236.6	24309	5354.87	10527.8	10612	5372.75	9728.47	10359.1	16741.1	24678.9	16376.3	25198.5	5775.89	10858.7	10678	10618.5	11061	18034.7	25998.7	17917.4
1545.23	13246.2	23823.5	5027.82	9618.07	9957.12	14000.4	24534.1	5130.11	10174.9	10585.7	14446.8	25746	5532.83	10182.6	11174	5364.12	10838.5	10890.3	15786	27891	15452.5	28215.1	5789.66	10950.8	12205.8	11280.6	11274.9	16929.2	29209	15841.3
1544.36	13203.4	23677.4	5079.11	9720.72	9851.1	13295.8	24626.5	5148.58	10180.1	9854.33	13567.4	24668.5	5499.3	11003	10077.9	5477.36	10628.1	10699.7	13576.8	25932.2	13604.9	26600.7	5723.68	11476.5	10346.8	10717	11365.2	14659.9	26185.3	13795.4
1543.5	13230.1	23467.7	4965.26	9719.05	10008.7	13614.7	24182.4	5271.23	9921.21	10510.8	14841.4	24882.8	5348.08	10391	11210.6	5471.33	10275	11353	15092.5	25660.9	15127.3	26393.9	5731.3	11241.7	11692.7	11046.5	12206.2	16485.5	27241.2	15140.9
1542.64	13274.1	23512.9	4842.76	9497.25	9749.23	13725.1	23758.6	4966.54	10119.5	10405.5	15045	24091.7	5310.15	10451.2	11239.7	5301.16	10304.7	10537.5	16188.4	25337.5	16076.4	25903.4	5702.52	10852.4	11932.9	10520.4	10930.4	17780.6	25833.5	16329.2
1541.77	13581.7	23326.4	4888.26	9654.89	9672.26	14926.5	23393.7	4919.13	10061.4	10222.6	14943.8	23554.7	5337.94	10826.4	10658.5	5011.54	10300.2	10804.4	15881.8	24401.5	16134	25095.4	5454.95	11320.9	11013.6	10516.1	11253.9	17424.4	25612	16463.3
1540.91	13272.5	23577.1	4858.46	9598.21	9821.16	13426.4	24149.9	5335.35	10134.4	10608.4	13744.4	25826.4	5517.36	10141.9	10757.8	5472	10204.6	11441.7	14833.7	27035.5	14254.1	26825.9	5670.22	10939.3	10771.8	10619.6	12474.1	15586.4	28241.9	15101.7
1540.05	13166	23483.3	4990.79	9645.77	9984.47	13344.3	24822.5	5315.13	9883.66	10835.6	13529.1	26199.6	5732.46	10610	11723.8	5457.38	10852	11218.2	14508.3	28498.8	14000.7	26988.5	6001.11	11294.1	12048.2	11588.1	11616.8	15491.3	29457	14015.4
1539.18	13444.4	23198.5	4859.68	9603.59	9907.5	14507.4	23642.8	5311.88	9871.7	10884	14930.1	24603.8	5540.31	10451	11514.9	5419.72	10466.2	11575.9	15389.6	26768.7	16255.4	24992.2	5668.28	11101.4	11638.3	11164.3	11753	16518	28074.5	16275.5
1538.32	13459.5	23316.1	4954.34	9654.03	10070.7	14676.6	25523.2	4993.62	10573	11008.6	15670.6	25694.3	5313.5	11082.1	11685.6	5135.69	10778.9	11590.4	16704.5	27229.7	15724.2	26054.2	5437.39	11104.5	12096.6	11272.7	11835	16775.6	28606.5	16971.7
1537.45	13274.9	23234	4834.86	9701.55	10124	14341.2	23485.8	4925.12	10057.9	10874.6	15587	24232	5394.17	10895.2	11782.1	5309.07	10767.1	11601.5	16961.1	26289.1	16705.6	24743	5417.95	11537.5	12515.8	11724.5	12555.6	17061.5	27456.3	17839.6
1536.59	13559	23562.6	4848.49	9702.77	10076	14738.7	24919.6	5048.73	10636	11066.4	16028.5	25362.4	5427.01	10906.8	11832.6	5458.98	11000	11693.3	16517.8	27124.1	16561.2	26737.5	5954.06	10927.5	12799.9	11242.1	11819.5	17476.2	29598.3	17531
1535.73	13284.8	23503.6	4937.32	9909.36	9926.71	14419.6	25524.1	5293.66	10693.4	10618.9	14648	27639.7	5767.46	11109	10706.6	5607.2	10857.5	11186.1	15371.2	30004.2	15326.8	29910.8	5915.68	11368.1	11110.7	11237.5	11551.2	16257.7	31335.1	15581.8
1534.86	13349	23702	5069.5	9583.76	10006	13913.8	24621	5379.62	10339.2	10366.3	15061.3	25062.6	5696.64	10570.8	11178.6	5432.74	10421.7	10792.3	15360	27368.7	16095.2	26552.9	5742.88	11180.4	11569.2	10570.5	11172.4	15395.1	28882.7	17513.3
1534	13280.2	23848.3	4756.36	9874.14	10038.9	14213	23849.1	5037.34	9883.34	10149.2	14857.8	25722.2	5405.6	10332	11054.1	5241.67	10068.8	10760.1	16111.9	26973.1	16236	27925.3	5855.5	11095	11658.5	10929	11637.2	17201.6	27016.3	16824.3
1533.13	13251.9	23558	4845.15	9834.85	10204.9	13711.6	23831.8	5317.72	10379.4	10686	14136.4	24352.2	5737.67	10974	11553	5733.97	10544.7	11059.3	15456.5	25914.5	14716.6	25909.8	5785.16	11252.1	12587.7	10937	11818.3	16410.4	28162.3	15375.9
1532.27	13454.8	23895	4933.92	9769.57	9974.79	13554.1	25143.3	5191.8	10216.9	10500.6	14685.5	26338	5455.7	10279	11274.7	5210.53	10494.6	11059.8	15862.9	27567.6	15966.6	28346.7	5799.23	10535.4	11433.4	11527.4	11796.1	16227.1	29366.2	15968.4
1531.4	13654.8	23729	5103.58	9912.38	10117.6	14084.2	26001.9	5166.36	10402.1	10734.6	14957.7	26967.9	5657.97	11036	11719.9	5596.31	10560.7	11508.1	14969.6	29055.3	16445	27716.6	5737.09	12111.2	12151.5	11592.6	11666.6	15905.5	30720.8	17613.2
1530.54	13525.3	23366.7	4935.11	9740.2	10150.5	13753.4	24415.8	5262.64	10111.8	10386.5	14867.4	26840.3	5620.01	10216.7	10519	5611.32	10784.6	10945.3	15296.1	28340.8	15241.7	29350.1	6159.97	10534.7	10952.4	10992.2	11612	15309.9	30050.4	16433.8
1529.67	13592.3	23700.6	5029.6	9998.52	10244.1	14688.2	25721.4	5249.25	10869.1	11022	15317	26160.5	5391.8	11692.5	11251.4	5469.4	11588.5	11585.5	15665.1	27931.9	16751.2	26405.4	5578.75	12233.8	12025.8	11922.2	12207.4	16752.2	28076.6	17484.5
1528.81	13644.9	23745.7	4924.75	10121	10314.5	14498.8	25334.4	5071.16	10926.1	11291.6	15317.8	26121.3	5126.65	11022.1	11850.2	5268.02	11496.7	11906.1	15448.5	27842.5	15810.2	26970.2	5297.1	11512.9	12062.1	11659.1	12831.6	16015.3	29209.3	16548.8
1527.94	13489.5	23836.9	5152.04	10119.3	10408	14189.9	23967.1	5425.4	10669	10716.2	14545.3	24528	5745.14	10772.4	10800.7	5498.14	11361.7	11169.6	15188.2	25022.1	15713.9	25288.6	6284.04	11820.1	11418.2	11891.7	12223.8	15585.5	25586.6	15834.8
1527.07	13680.6	23731.7	4928.82	10163.7	10339.8	14227.8	24010.4	5153.31	11158.8	10920.1	14939.8	24027.3	5258.43	11657.6	11653.2	5318.03	11595.7	11630.4	15429.1	24259	15325.3	25511.3	5616.2	12023.8	12248.5	12475.3	11877.1	16723.3	25438.8	15806.3
1526.21	13799.5	24007.6	4870.24	10046.5	10355.4	14916.8	26342.9	5028.14	10439.9	11128.8	16269.7	26635.4	5395.89	11291	11701.3	5292.91	10565.9	11585.8	16322.5	27136.8	16747.7	27769.3	5404.95	11794.4	11904.5	10618.7	11910	17245.6	27889.4	17751.8
1525.34	13496.9	23619.6	5163.81	10203.5	10391.1	14462.4	25910.9	5179.58	10849.9	11393.9	15623.3	27938	5210.11	11864.7	12332.7	5210.79	11146	11584.9	15997.9	28654.7	16017.7	28162.6	5441.21	12884.9	12564.3	11333.6	11867	16864.9	29984.2	16516.5
1524.48	13607.1	23609.8	5067.69	10022.8	10403.8	14275.7	24354.9	5158.71	10758.5	11055.9	15556.1	25438.2	5557.08	10933.8	11444.8	5499.76	11120	11396.6	16064.8	27138.3	16553.6	26691.5	6004.94	11891.9	11765.4	11182.3	12403.8	17225.6	27524.9	17489.2
1523.61	13434.6	23960.6	5095.67	10191.3	10546.2	14013.9	26253.8	5195.68	11180.8	11469.6	14458	27647.2	5615.71	11466.9	12344.2	5489.13	12024.4	12122.1	14955.8	29917	14967.4	28882.8	5971.55	11614.1	13559.3	12585.6	12835.6	15271.3	30192.9	16031.4
1522.74	13409.2	23818	4907.27	10333.8	10279	14085.4	24720.7	5068.87	10691.6	10286.2	14655.8	25041.6	5521.42	11201.3	10697.3	5541.95	11635.4	10515.3	15284.6	26720.6	14819.2	25405.9	5567.75	11286.8	11386.7	12594.9	11087.2	16376.5	26885.6	15693.8
1521.88	13380.9	23519.7	4981.42	10118.6	10352.2	13755.6	24731.6	5071.53	10362.3	10661.5	13810.2	25227.2	5109.6	10404.8	11633.3	5098.34	10681.1	11676.4	15065.1	27226.6	14774.7	26318.9	5156.76	10623.2	12042.4	11343.1	12633.3	16315.9	27729.9	15007.5
1521.01	13623.7	23985.7	5185.32	10137	10586.9	14016	26216.9	5429.24	10886	11565.8	14786.2	28647.2	5432.75	11427.9	11653.1	5927.01	11860.3	11639	15004	30312	15776.8	29570.4	5879.55	12509.5	12754.1	13044.9	12085.8	16145.1	32351.2	16887.2
1520.14	13889.5	23998.9	4942.21	10132.4	10181.4	14973.4	24376.1	5176.2	10673.4	10538.4	15595.5	26029.6	5510.66	11149.4	10557.4	5440.67	11199.3	10646.5	16526.6	26152.7	15921.2	28136.8	5821	11313	11581.3	12067.7	10957	17507.2	27030	16614.2
1519.27	13624.8	23931.3	5140.28	10104.7	10251.7	13759.5	24659.2	5497.46	11026.1	10392.5	14020	25572.2	5783.84	11756.9	10420.3	5501.05	11472.9	11363.5	14483.9	26712.3	14163.9	26601.9	5871.54	12542.3	11210.4	11808.4	12313.9	15530.4	29381.1	14791.6
1518.41	13654.1	24025.2	4928.98	10077	10140.4	14875.7	24575	5054.18	10507.2	10956.3	15817.5	25326.4	5259.43	11104.3	11175.5	5508.89	11338.8	11935.7	16218.3	26059.8	16797.8	26261	5384.98	11409	11358.7	11352.8	12259.6	16608.8	27498.3	18202.8
1517.54	13738.2	23980.7	4959.83	9887.96	10308.7	14995.5	25535.7	5117.31	10586.5	10366.3	16131.3	27411.1	5241.31	11237.8	11249.4	5281.36	11064.6	11307.8	17522.5	28382.5	16294.6	28604.2	5316.65	12132.7	11446.6	12160.9	12200.7	17866.3	29517.5	16468.6
1516.67	13384.3	23679.8	5065.59	10015.9	10157.1	13735.4	23824.4	5086.78	10063.2	10879.6	14146.4	26069.2	5445.88	10672	11897.2	5504.75	10711.2	11083.3	14579.5	27519.6	14185	27510.5	5808.29	11006.3	12369.4	11255.9	11909.5	14631.6	28525.2	14751.9
1515.8	13736.4	23888.9	5035.91	9945.05	10290.8	15036.6	25766.4	5430.71	10655.8	10301.4	15366.9	27314.4	5785.25	10663.2	11313.2	5692.34	11583.2	10713.1	15564.4	27447.1	16157.2	28851.9	5816.77	11585.6	11885.7	12724.7	11276.6	16518.8	28472.6	17718.2
1514.94	13572.7	23772.4	4902.54	9816.59	10222.7	14675.8	25875.1	5172.67	10375.4	10797.9	15974.6	28243.7	5632.1	10920.5	11058.6	5247.36	11152.1	10906.4	16747.6	29905.5	17528.8	31046.5	5677.76	11108.9	11283.8	11803	11033.3	16952.1	31321.1	17949.5
1514.07	13610.7	23728	5062.97	9898.42	10091.4	14377.3	25111.1	5151.04	10477.4	11066.2	15743.7	26788.8	5467.55	11025.1	11808.3	5659.67	11048.8	11460.6	16804	27227	16130.9	27769.2	5927.01	11504	12648.4	11686.6	11757.7	17397.9	29037.3	17054.7
1513.2	13429.8	24095.3	5018.9	10011.9	10052.2	14198.4	25063.6	5314	10405.8	10513.8	14834.3	27546.6	5567.97	10722.8	11429.6	5704.33	11426.1	10597.8	15572.7	29900.8	15151.2	30113.4	6070.13	11655.5	12499.5	11815.9	10795.6	15969.8	31129	15288.5
1512.33	13617.5	23869.5	5038.19	9693.48	10171.4	14132.2	25586.4	5046.62	10170	10602.1	15453.7	26308.5	5369.25	10243	11622.3	5309.21	10318.1	11371.9	16758.2	28622.7	16655.3	26460.3	5636.22	10673.8	11949.3	10455	12060	17224	30609.7	17368.3
1511.46	13445.3	23436.5	4945.21	10025.7	10218.6	13706.3	23600.3	5355.57	10393.2	10802.9	14077.8	24015.8	5878.97	10958.9	11347	5772.83	10962.7	11730.8	15121.9	25638.6	15333.9	24034.9	6351.24	11327.8	11637.8	11924.9	11780.5	16617.9	27379.3	16540.6
1510.59	13463.2	23751.9	5047.96	9963.54	9989.44	14062.7	25438.3	5292.52	10930.3	10486.4	15194.7	26947.7	5605.4	11460.4	11494.2	5437.51	11402.8	10675.8	15308.7	27776.2	15534.9	28143.7	6028.75	12016.1	12159.9	11538.9	10855.3	16710.9	28251.9	15837.9
1509.73	13763	23664.4	5107.52	9829.46	10272.6	14175.3	24338.6	5404.71	10593.5	10609	15237.2	25220.5	5837.27	11268.4	11400.5	5786.55	11021.9	11607.9	16128.6	25705.9	15969.1	27723.4	6089.72	12384.6	11583.1	11777.2	11934.7	16518.6	26242.4	17393.4
1508.86	13700.2	23758.1	4908.13	9804.74	9960.1	15032	25880.5	5092.86	10739	10801.3	16241.2	28053.1	5128.83	10843	11701.5	5440.47	10897.1	11474.2	16734.1	30623.2	16690.7	30651.4	5311.11	11159.3	12610.5	11105.2	12523.7	17464.1	31796.8	17254.6
1507.99	13562.6	23748.2	5094.25	9886.47	10056.2	14299.7	23749.4	5284.56	9932.25	11014.9	14415.3	25214.9	5311.38	9975.92	11802.4	5494.41	10168.6	11484.4	15774.9	26200.7	15085.3	27151.3	5840.93	10344.1	12869.3	10518.6	12215.4	16628	27007.1	15327.3
1507.12	13393.5	23873.6	5032.98	9556.9	9971.04	14399.7	24525.9	5499.38	10148.9	10401.6	15043.4	25044.9	5766.69	10539.2	11142.8	5812.2	10255.8	10758	15677.9	25708.4	15737.2	25861	6130.55	10598	11525.5	10355.2	11418.9	16352	26579.4	17058.4
1506.25	13560.8	23849.3	5006.23	9906.06	10035.5	14836.9	25107.5	5222.37	9946.3	10409.2	14967.5	27156.9	5503.55	10327.3	11372.5	5368.14	10072.3	10937	15850.9	27788	15312.8	28253.5	5793.88	10354.6	12226.4	10890.6	11495.1	16182.7	28137.7	15733.6
1505.38	13173.2	23868.2	5057.11	9714.6	10033.7	13626.9	25958.5	5339.29	10151.3	10271.5	13776.2	26676.8	5868.61	11009.6	10782.9	5804.87	10633.2	11101.9	14975.3	27476.1	13921.5	27060.2	6425.16	11037.3	11709.4	11326.8	11688.7	15809.3	27924.9	14185.7
1504.51	13438.3	23789.3	5010.25	9733.05	9891.14	14398.5	24932.7	5368.31	10575.4	10722.8	14522.1	26196	5799.81	11581.4	11589.2	5735.75	11124	10843.6	15396.8	26543.3	15355.6	26774.8	6053.87	12116.3	12572.6	11564.6	11146	16352.6	27713.1	16630.9
1503.64	13404.3	23917.4	4923.16	9599.16	10119.4	13621	24744.4	5092.52	10460.9	10751.8	13848	24958.8	5097.43	10665.5	11060.7	5154.79	10813.4	11605.6	14932.4	25365.8	14397	25648.4	5147.79	11623	11936.1	11577.5	12725.8	15322	27472.1	15022.7
1502.77	13425	23755.3	4997.02	9565.9	10045.8	13941.1	25503.9	5366.87	10223.5	10402.6	15131	27943.6	5528.68	10746.7	10854.6	5604.23	10279.7	10792.6	16437.8	28630.6	15828.2	29837.5	5856.39	11548.7	11699.3	11002.7	10800	18015.8	30488.5	16088.5
1501.9	13382.5	23788.5	5016.27	9880.27	10118.7	13830.3	24897.6	5496.37	10129.4	10377.3	14150.7	24972.6	5529.55	10684.7	10606.7	5712.95	11138.4	10967	14559.4	26091.3	14375.6	25926.5	5655.65	11339.6	11242.9	12085.4	11868.3	15915.9	28486.9	15612.7
1501.03	13357.2	23801.6	4871.78	9582.7	9904.42	14546.9	25338.1	5314.31	10325.8	10857.6	14719.6	27648.3	5415.09	10409.9	10918.3	5744.25	10472.8	11302.2	14802.8	29274.4	14773.7	28785	5890.42	11083.4	10975.4	11219	11326	15249.9	31459.7	15419.1
1500.16	13432.4	23929.6	5063.36	9770.6	10118.1	14530.9	24814.7	5281.39	10349.8	10410.8	14956.2	26839.2	5565.67	10433.1	11169.6	5306.04	11326.2	11202.1	16435.4	29088.3	16163.9	26842.4	5619.02	11424.6	12231.9	12172	12026.2	16988.5	30069.2	17010.8
1499.29	13321	24247.1	5028.03	9625.33	9955.56	13512.1	25923.5	5184.85	10480.5	10088	14279.4	26772.3	5400.65	10885.6	10842.1	5692.89	10925	10477.9	15506.6	28435.1	14519.4	27862.5	5780.59	11952.5	10845.9	11586.9	10721.8	16652	28622.6	14694.3
1498.42	13453.6	23987.4	5121.91	9715.55	10166.3	13522	26093.2	5547.95	10062	10857.7	14081.4	28423.8	5872.43	10833.1	11841.6	5789.35	10620.9	11133.8	14283.9	30058.9	14741.3	30846.4	6121.78	11081.1	12839.1	11545.4	11597.6	14461.2	32300.9	14776.2
1497.55	13680.9	23914.4	5006.2	9662.2	10044	13869.1	24321.4	5238.39	9810.94	10432.5	14544.9	25167.7	5600.42	9902.42	10951	5727.07	10195.8	10774.2	15740.7	25838.6	14784.7	26431.5	5793.21	10696.3	11896.9	10314.5	10850.8	16159.6	26316.2	15399.1
1496.68	13566.6	23738	4970.9	9804.03	10326.4	14121.8	25281.3	5077.77	10668.3	11122.1	15161.1	25411.4	5450.9	11500.8	11946.5	5420.15	11477.5	11591.1	15575	25677.4	16031.2	26899.6	5945.96	11634.3	12622.5	12213.9	11696.8	16026.4	26773	17007.8
1495.8	13762.3	24069.7	5001.6	9825.29	10003.2	14964.1	26224.5	5251.25	10658	10601.1	15341.1	26651.6	5304.76	11562.5	10966.4	5604.4	10828.1	11295.9	16577.9	27297.8	15369	27735.9	5308.91	11946	11773.1	11447.5	12203.4	18215.2	29281.6	15381.5
1494.93	13559.1	23549.1	4951.96	9685.88	10165	14908.2	25006.1	5166.61	9847.85	10805.6	16156	25900.4	5263.94	10713.9	10979.6	5670.01	10646.2	10849.4	16461.9	26033.8	17684.3	26015.6	5626.85	11726.6	11169.8	11253.4	11500	16608.6	28358.8	18627
1494.06	13536.7	23737.2	5077.32	9945.25	10022.7	14372.7	25181.8	5564.14	10787.7	10059.1	15277.9	25539.4	5595.44	11706.7	10916.7	5690.95	11767.3	10676.7	16724.3	27892.5	16490.4	26251.2	5955.86	12389.3	11814.2	12842.7	10923.5	17661	29205.1	16886.8
1493.19	13600.3	24220.7	5010.48	9863.22	10376.6	13906.7	24425.2	5415.19	10792.9	11211.8	14964.9	26548.7	5886.22	11190.6	11272.9	5526.79	11149.5	11376.8	15883.4	28475	15605.4	27956.7	5914.25	12151.2	12362	11702.6	11580.4	16852.1	28597.7	15655.4
1492.32	13572.1	23935.5	4914.99	9872.99	10343.3	13885.7	24671.5	5137.24	10059	10761.3	14529.3	25319.6	5308.57	10838.9	11639.3	5417.7	10699.6	11033.9	15532.9	26372.6	14888.6	27576.5	5606.84	11854.6	12442.6	11221.9	11676.4	16733.6	26943.9	16260
1491.45	13931	24000.1	5195.11	9934.36	10378.8	15008.2	24029.8	5698.9	10666.4	11236.1	15717.1	25529.1	5927.38	11217.3	12249.1	6266.4	10851.6	12168.9	15824	25976.2	16447.8	27436.8	5984.69	11555.5	13227.3	11889.6	12724.2	16310	27657.7	17033
1490.57	13610.4	24007.5	5199.94	10193.5	10248	13817.9	24208.6	5217.9	10221	11009.9	14902.7	24547.1	5580.11	10980.5	11677.6	5355.78	10283.4	11475.6	15586.4	26972.1	14977.1	26135.6	5965.98	11238.4	12663.8	10837.5	12086.2	16838.3	28734.9	16290.7
1489.7	13762.9	24146.6	5044.28	9916.59	10214.7	14984	25207.3	5267.99	9921.54	10377.4	16138.6	27391.6	5577.73	10251.5	10677.1	5692.36	10563.9	10657.3	17633	29201.9	16174.1	29514.1	6134.59	10270.6	11313.2	11589.5	10682.1	18886.6	31205.9	16634.6
1488.83	14118.7	24222.7	5123.64	10190	10571.1	14133.9	26154.7	5253.68	10733.6	11362.5	14904.4	27043.4	5400.27	11310.2	12409.6	5488.37	11558.3	11588.4	14926.9	27723	15467.2	29491.3	5727.2	11899.7	13422.2	12671.4	12720.8	15689.9	28969.2	16782.5
1487.96	13884.2	23903.3	5240.22	10211.1	10503.4	14414.1	25100.1	5471.02	11134.6	11405.7	14680.7	25352.5	5816.31	11529.9	11450.3	5969.12	11447	12383.1	15318.6	26108.6	15920.8	27171.7	6152.16	12094.8	12233.8	12295.6	13402.1	15463.3	27216.6	16359.1
1487.08	14082.3	24265.9	5227.86	10266.7	10361.2	14998.4	24397.3	5292.96	10300	10569.5	15069.6	26497	5798.05	10835.7	11595.5	5361.23	10331.5	10889.9	16166.7	28652.6	15383.8	29026.1	6166.91	10888.9	11731.1	10826.3	11581.3	16665.9	31111.1	15464.2
1486.21	14148.6	24138.5	5092.34	10425.3	10179	14178	24502.4	5316.64	11102.9	11115	15161.5	26869.7	5654.7	11205.1	11931.3	5473.33	11303.8	12123.5	16040	28516.2	15453.6	27840.1	5832.43	12242.4	13026.2	12388.3	13275.6	16430.5	30612.4	15687.2
1485.34	14008.7	24094.3	5180.24	10097	10724.1	14534.1	24184	5545.97	10281.2	10759.7	15557	26293.5	5985.56	11008.1	11168	5998.48	10887.5	11789.9	15771	27156.9	16551.3	28437.9	6526.43	11890.3	11333.7	11913.5	12422.7	16882.4	28527.9	16935.9
1484.47	14324.1	24499.5	5222.29	10310	10453.2	14515.2	25798.8	5534.01	10559	10628.9	14945.1	26080	5684.04	11316.9	10864	5708.85	10773.6	11058.3	14947	27455.7	16429.6	28620.2	6182.42	12232.3	11570.2	11140.4	12122	15873.7	27981.7	17700.2
1483.59	14189.9	24080.2	5198.48	10560.1	10648.9	14588.2	26273.7	5284.23	11441.9	11508.4	14655.7	28144.6	5454.65	11820	11648.8	5569.22	11510.4	12615.4	16120.9	30404.9	14856.3	28449.1	5491.78	12397	12791	12469.8	13529.2	17112.3	33181.7	15580.2
1482.72	14075.8	24236.3	5168.96	10415.2	10649.9	15096.9	24528.1	5209.17	11403.2	11196	16549	24821.5	5238.42	11857.3	12264	5527.28	11435.9	11201.1	17067.4	26394	17547.8	26577	5591.15	12219.6	13225.4	12511.1	11876.4	17615.8	26489.3	17820.9
1481.84	14150.7	24286.5	5193.82	10453.5	10768.2	14342.3	25535.1	5665.42	10647.9	11755.9	14783.7	27901.5	6140.8	11011.8	12344.3	6023.59	10693.6	12380.4	15420.1	28977.1	15586.1	30309.5	6526.68	11407	12927.3	11399.3	13577.3	15830.3	30501.3	16375.3
1480.97	14019.5	24622.8	5192.93	10423	10786.4	15226	25113.2	5316.88	11069.3	11006	15800.2	25788.5	5739.69	11877.1	11199.8	5840.96	11658.6	11698.7	16297.9	26886.3	17352.2	26056.4	6135.87	12296.2	11978.9	12271.1	11990.8	17793.6	28758.9	17428.4
1480.1	14177.2	24598.5	5286.43	10438.4	10801.7	15052.5	26347.2	5642.52	10684.2	11771	15150.9	27902.8	5680.24	11434.8	12354.7	6082.13	11405.8	12824.8	16142.1	28373.5	15529.7	30613.4	6233.44	11567.1	13156.7	12353.4	13020.1	17366.8	30224.7	16749.3
1479.22	14123.3	24665.7	5265.49	10533.8	10894.2	15119.6	25721.9	5647.98	10626.4	10964.9	15288.9	27034	5712.16	10680.8	11558.7	5879.2	10736.1	11529.2	16242	29088.7	15932	27656.5	5905.22	11708.6	12651.3	11316.7	11548.6	17568	30366.8	16397.6
1478.35	14272.4	24807.3	5301.76	10660.7	10755.1	15450.2	27215.9	5751.13	10785.3	11334	15650.8	29389	6017.09	11652.8	11708.8	6005.72	11797.6	12166.3	15675	31774.9	16293.7	32183.1	6409.62	11963.4	12027.5	12117.5	12663.9	16078.3	34890.2	17390
1477.47	14107	24562.8	5209.35	10341.5	10870.4	14410.4	25358.3	5395.2	11335.5	10915.9	15648.7	25606.3	5766.28	11770.9	11779.2	5750.03	12046.7	11055.1	16223.8	26861.7	16128.4	27540.9	5841.93	11932.1	12737.4	12934	11699.3	17199.5	28958.4	16552.1
1476.6	14284.6	24507.1	5168.42	10622.7	10994.3	15371.8	24678.6	5447.34	10692.6	11769.2	16883.7	25188.1	5562.33	11068.6	12758.7	5845.3	11496.2	12842.2	17144.9	26499.3	17299	25723.5	6018.55	11350.9	13892.9	11969.3	13316.4	17149.6	27606.2	17440.4
1475.72	14245	24585.8	5384.75	10855.2	10918.1	14667.6	25804.3	5407.62	11478	11316.6	15980.9	26619.1	5528.08	12188.8	11768.9	5856.33	11641.7	12089.8	17382.1	29193.7	16356.3	29092.7	5723.7	13164.5	12275.5	12085.8	12932.5	18815.9	30734.3	17359.8
1474.85	14328.3	24958.7	5343.81	10687.6	10856.2	14673.4	26598.5	5399.06	11441.5	10946.8	15280.4	28328.6	5924.99	12340.8	11761.6	5854.28	11530.5	11084.1	15738.3	31133.8	16027.2	30456.9	6224.13	12917.8	11903	11944	11957.6	17123.3	33951.9	17494.2
1473.98	14422.9	24817.3	5417.17	10920.1	10974.3	14582.9	26255.8	5731.42	11695.5	10980.8	15317.2	26891.1	6029.19	12368	11580.8	6105.15	12852.2	11041.6	15682	29135.9	15889	27980	6619.59	12985.9	12296.7	13780	11327.3	17201.1	30236.5	17356
1473.1	14537.6	24981.5	5364.81	10855.3	10881	14547.5	25724	5798.01	11343.8	11445.3	15314.5	27199.3	5816.38	11531.6	11752.9	6162.02	12180.8	12080.2	15616.5	29491.3	16298	29532	6158.59	11607.5	12561.2	12477.7	12358.7	15792	29810.6	16790.7
1472.22	14497.9	24920.1	5389.59	10847.7	11281.9	15447.9	25064.8	5615.12	11241.3	11796.8	15698.4	26080.3	6017.44	12227.5	12239.8	6098.72	11842.6	12294.2	17095.7	26784.6	15855.7	28570.7	6363.79	12864.4	13201.7	12816.6	12672.4	18778.4	29402.2	17335.8
1471.35	14489.7	25327	5360.1	10954.4	11057.2	14630.6	26009	5579.1	11796.4	11663.8	15566.1	28539	5992.77	12572.8	11991.2	5603.3	12001	11876.6	16956.7	28985.1	15914.2	28653.3	6038.46	13138.2	13115.2	12748	12892.8	17526.6	29755.1	17057.5
1470.47	14375.8	25222.7	5353.46	10955.3	11132.4	15282.5	26890.2	5864.58	12034.1	11162.5	15637.3	26935.8	6140.43	12726.6	11718.8	6349.96	12627.8	12025	16120.2	28402.1	16133.4	27911.8	6600.57	12808.2	12162.6	13276.5	12045.9	16452.6	31202.2	17398.5
1469.6	14944.3	25284	5426.76	11067.6	11230.3	16259.3	27156.6	5764.2	11927.5	11259.9	16548.9	29147.7	5929.23	12222.4	12380	5807.76	12758.2	12382.2	16749.4	29960.5	18179.3	29800.5	6244.19	12992.7	13518	13764.2	13214	17305.9	31490.9	19583.9
1468.72	14650.6	25219.6	5357.32	11091.4	11162.7	15596	27711.9	5892.48	11709	11884.6	15851.5	29748.3	6079.24	12578	11905.8	5904.04	12197.9	11973.4	16365.9	31852.5	17003.5	32518.1	6629.96	13589.6	12997.8	13136.3	12978	17006.3	33449.9	17825.9
1467.85	14727.9	25375.1	5693.13	11577.5	11297.8	14772.3	26577.3	6116.2	12457.7	11356.4	15561.4	28192.6	6265.17	13190.9	11929.8	6658.11	13270	12135.5	16969.6	29009.1	16978.3	28826.1	6768.9	14029.6	12043.8	13771.7	12807	18059.5	30368.5	18359.2
1466.97	14557	25778.7	5620.81	11529.8	11235.9	15786.5	26491.6	5762.8	12603.9	11703.2	16752.3	28205.3	6049.99	13289.1	12335.6	5768.01	12645.3	11961.5	18193.6	29093.2	18082.1	30565.8	6433.14	14123.6	13170.7	13371.7	12937.2	18613.2	29810.9	19233.9
1466.09	14714.3	25557.4	5348.83	11385.2	11656.2	15324.3	27072	5540.28	11817	11904.5	15372.5	27752.1	5827.37	12720.7	12333.3	5547.28	12459.5	12318.6	16507	28653.2	16205.4	29173.2	6043.8	12762.4	13043.5	13087	12741.6	17740	29860.3	17620.4
1465.22	14882.9	25635.7	5521.89	11537.2	11648.5	16193.3	26247.4	5564.32	12029.2	11768.1	17795.4	28394.3	5735.07	12039.5	12205	5884.49	12947.4	12184.9	18598.9	29842.6	19553.1	29637.8	6079.57	12731.6	12920.5	13157.9	13246.3	19762.7	30457.1	21085.7
1464.34	15068.5	25893.6	5461.05	11740.5	11754.8	16379.7	26162.9	6006.3	12756.2	12441.1	16625.1	28189.8	6554.79	12998.1	13632.3	6195.7	12960.7	13547.3	18183.7	28436.3	17961.9	30054.9	7119.68	13880.1	14902.4	14149.5	14292	19455	28762.1	18112.2
1463.46	15214.2	26308.3	5517.13	11895.3	11767	16105.2	27395.5	5590.37	13079.7	12410.8	16173.4	29112.2	5680.36	14310.8	13525.9	6000.65	13417	13377.3	17450.6	31727.5	16948.5	31266.5	5922.93	14895.2	14048.7	14643.3	14422.9	17733.8	33239.6	17516.3
1462.59	15057.6	25762.1	5769.89	11978.8	11953.1	15938.3	26246.5	6211.61	13134.3	12282.5	16237.1	28814.3	6473.6	14173.5	13033.9	6246.96	13390.7	12607.6	17794.7	30858.7	17723.1	29133	7119.05	15181.5	14268.3	14195.1	12902.3	19526.1	33892.1	18294.5
1461.71	15100.6	26151	5700.48	11871.3	11988.1	16265	28247.7	5966.51	12424.9	12963.4	16454.5	29410.1	6079.53	12704.6	13421.6	6066.08	13527.5	13172.5	17204.9	30191.5	17099.6	29562.7	6562.35	13181	14326	14319.1	14269.5	18906.8	31626.6	17494.4
1460.83	15365.8	26043.8	5591.2	11937.6	11980.3	15529.1	28376.7	5957.08	12235.3	13073.9	16002.9	29626.1	6157.89	12362.5	13921.3	6092.42	12513.5	13646.3	16602.9	30939.3	16466.6	31190.4	6379.06	13462.5	15148.5	13460.9	14557.8	17861.2	32870.6	16751.6
1459.95	15408.8	26204.6	5641.52	11841.5	12026.7	16917.9	26765.7	5862.52	12502.9	12806.4	18294.8	29434.2	5932.23	12994.9	13125.8	6433.27	12967.2	13893.9	19213.8	30816.9	18352.1	30651.8	6425.9	13311.5	13674	13664.4	14154.2	20025.8	32462.1	18692
1459.08	15534.3	26114.6	5560.78	12090.1	12158.5	15915	26861.9	5641.42	12895.2	12760.2	16311.2	28315.9	5685.28	12957.7	13985.7	5726.9	13712.8	12958.5	16491.3	29081.7	17444.6	28878	6193.35	14204.9	15215.8	14102.1	13202.9	17328.9	29607	18702.4
1458.2	15585.7	26115.8	5821.86	11831.7	12318.8	16348.9	28677.6	5987.74	12983.2	12559.1	17060.6	29413.9	6427.68	13321.3	12637.1	6070.16	13278.7	12749.4	18753.8	29421.8	18122	29982.3	6764.93	14311.7	12688.7	13699.9	13894.7	20574.5	31345.2	18829.9
1457.32	15509	26322	5761.04	12063.2	12276.7	16791.7	28177	6292.41	13059.1	12461.6	17039.1	29815.2	6899.13	14025.1	12926.7	6435.44	14117.6	13600.2	17672.4	30854.6	18152.6	31440.6	7512.95	14927.9	13571.8	14612.3	14859.2	18313	32001.8	18854.3
1456.44	15605.9	26232	5651.85	12038.3	12343	17156.2	27894.3	6194.3	12651.7	12638.2	17676.9	29287.2	6666.96	13865.2	13073.5	6346.63	12757.5	13817	19056	31597.2	19127.4	31071	7247.93	15064.8	13609.1	13107.2	14958.5	19927.5	32039.9	20749.8
1455.57	15665.9	26469.4	5881.46	12246.9	12278.2	16956.4	26696.9	5906.42	13140.7	12327.9	17592.1	27762.2	6381.81	13566.4	12506.8	6363.24	13322.1	12702.8	19202.3	28708.4	18850.3	28662.6	6781.43	13907.9	13619.3	14315.8	12861.3	20971.9	30370.4	19127.4
1454.69	15637.5	26467.7	5743.82	12196.4	12227.7	16975.7	27253.1	5966.43	13399.9	12926.8	18604.5	29249.2	6305.17	13853.4	13603	6345.09	14208.9	13449.2	20141.3	29721.7	19283	29844.1	6441.33	15183	14855.8	15227	13896.5	20935.8	31037.6	20188.1
1453.81	15555.1	26716.4	5739.98	12541.4	12308.1	16821.5	28748.4	6049.33	13245.7	12484.4	17990.3	29007.2	6305.62	13256.9	13171.1	6180.26	14407	13525.6	18587.4	31806.3	19540.2	30927.3	6910.36	13684.8	13639.2	14491.8	14552	20172.1	34460.6	21119.7
1452.93	15569.5	26578	5679.23	12399.8	12701.4	16465.2	29201.3	5733.76	12772	13733.3	16870.2	29257.4	6202.9	13442	14617.9	6055.44	13552.7	14902.6	17678.9	29863.7	17800.5	31774.9	6740.51	13477.6	15981	13561.2	15999.5	17974.5	30421.3	18484
1452.05	15729	26738.4	5937.12	12520	12505.8	15863.2	28502.5	6179.84	12799.4	13681.1	16751	30355.2	6791.58	13239.9	14789.8	6603.31	13283	14228	17146.2	30692.8	16814.2	30984.9	7094.07	13435.6	15659.2	13632.7	14262	18327.1	31280.8	17916.2
1451.17	15643.8	26526.1	5941.78	12401.2	12512.2	16561.1	26760.7	6119.77	13016.1	13678.8	18157.3	29282.1	6597.85	13462.7	14934.1	6427.44	13533.2	14632.2	19577.7	31025.9	18266.3	30614.2	6702.3	13628.3	15293.8	14832.1	15322.3	20585.1	33311	18527.7
1450.29	15575.6	26669.4	5818.47	12413.3	12694.8	15740.5	28144.8	6120.7	13576	12822.9	16402.9	28299.8	6317.34	13941.8	13072.2	6334.4	14499.7	13611.3	17524.7	28515.2	16688.9	28398.4	6882.85	15027.5	13813.6	15028.4	13708.9	18913.6	29937.6	17645.2
1449.41	15843.1	26798.4	5851.58	12556.2	12505	15859.3	27100.9	6030.64	13443.2	12566	16264.2	28830.3	6540.35	14415.2	13427.6	6060.28	13631.7	13814	16763.2	30434	17451.4	30690.8	6933.18	14779.5	13614.7	13684	14958.5	17864.8	32469.2	18107.4
1448.53	16093.3	26899	5918.79	12792.8	12750.1	16671.6	27203.2	6452.81	13767.2	13272	17904.1	28813.2	6957.33	14468.8	14517.4	6827.24	13995	13654.7	18376.1	29079.1	19244.8	30931.6	7035.15	14489.4	14628.7	14495.2	14580.3	19839.7	30135	19998.1
1447.65	16084.8	26905.7	5852.39	12620	12543.3	16639.1	28709	6292.47	13482.3	13217.2	17383.4	30415.2	6363.04	14201.6	13261.3	6381.44	14370.7	13988.8	18030.7	30557	18191.3	30993	6709.06	14688.6	13962.8	15515.9	14457.7	19168.7	33465.6	19326.3
1446.77	15738.2	27239.2	5857.06	12597.9	12788.3	17107	28692.3	6389.19	13607	13810.3	17631.5	30774.1	6462.41	14333.5	14304.4	6890.41	14580.8	14974.3	18712.7	32799.9	18259.5	31486.7	6590.06	15424.9	15014.2	15947.8	15517.6	19935.5	35943.4	18930.6
1445.9	15565	26987.3	5915.72	12655.4	12490.6	15614	28973.8	6311.05	13735.8	13596.5	15721.9	31811.7	6462.92	14523.2	13614.2	6748.69	15096.4	13864	15917.7	33041.6	16497.3	32558.5	6530.53	15364	14312.1	15842.2	14289.3	16377.2	36282.8	17302.7
1445.02	15613.4	26559.3	5829.46	12451.5	12849.3	16268.8	28512.5	6111.98	13529.5	13258.1	17107.3	28993.8	6196.49	14844.3	13991.9	6518.7	14753.7	13982.2	17125.3	29994.9	18567.6	29006.2	6348.02	15192.8	14678.1	15117.6	15063.4	17496.4	30844.3	20066.8
1444.13	15866.3	26426.9	6027.28	12560.1	12741.9	17136.4	27400	6467.19	13612	13344.9	18779.2	29181.2	6677.09	14937.5	14107.9	6509.8	14952.4	13547.1	19597.9	31166.2	19294.5	29892.6	6922.8	15017.3	14189.5	15231.1	13590	19831.8	31992.7	20744.8
1443.25	15556.9	26885.2	5821.76	12481.3	12586.4	16125.1	27996.5	6392.28	12773.5	12988.1	16563.9	30642.1	6996.79	13953.5	13197.5	6618.43	13624.7	13930.5	16869.3	31603.9	17326.6	32561.4	7579.04	14432.8	13298.3	13817.7	14008	17526	33094.5	18521
1442.37	15591.1	26636.3	5897.42	12578.5	12689.2	16481.6	27049.8	6078.07	13743.4	13900.3	16872.7	27352.5	6638.24	14161.9	14231.8	6111.31	14936.7	14333	17160.5	27763.9	17046.3	27829.6	6709.21	15347.4	15446.6	15736.1	15622.6	17914.5	30090.5	17721.2
1441.49	15582.7	26603.3	5768.64	12337.9	12698.4	17102	28599.2	5950.92	12734.8	13510.3	17537.4	30300.9	6250.3	13473.8	13778.6	6289.99	12968.7	14674.7	18932.6	31976.7	17751.1	32611.1	6753.51	14685	14187.8	12974.7	14996.9	19339.6	32846.3	18170
1440.61	15568.7	26391.5	5923.75	12636.6	12585.5	16089.2	26959.4	6266.4	13344.4	12820.5	17275.9	27289.5	6288.14	14383.4	13565.4	6660.72	13710.1	13055.1	17543.3	29270.7	18332.6	28697.6	6831.64	15330	14782	14034.4	13119.6	19187.6	29344	19294.5
1439.73	15702.2	26074.8	5814.89	12501	12617.4	17078.3	26325.2	6014.16	12832.8	12994.9	17195.5	26819.1	6583.52	13407.4	13062.4	6056.73	13242.4	13410.3	18199.3	29294.8	18717.8	29431.9	6679.94	13575.9	13329.3	13864	14589.2	18230.8	31691.3	18923.1
1438.85	15432.7	26572.5	5720.24	12433.6	12376.8	15577.9	28423.6	5846.65	13543.8	12474.2	16989	30439.1	5950.58	13739.5	12688.5	5910.69	14240.7	12593.4	17303.2	33401.9	17938.5	32842	6011.74	14813.2	13071.2	14405.9	13764	17381.6	33725.6	18828.7
1437.97	15387.5	26672.8	5827.05	12221.5	12635.7	15638.4	29298.4	5849.51	12319.1	13256.9	17024	31362.4	6038.72	12625.7	14012.7	6192.91	13212.4	14266.4	17495.6	31645.6	17669.4	33607.7	6285.51	13395.8	15075	14294.3	14943.5	18760	33625.4	18886.1
1437.09	15447.2	26347.7	5712.58	12287.4	12508.7	16039.3	27254.9	5981.4	13003.5	12806.8	16763.8	29102.7	6267.29	13261.5	13639.6	6239.4	13651.3	12932.1	17925	29440.8	16775.7	29839.9	6864.84	13645	13803.7	14180.9	13161	18787.3	30041	17395.5
1436.21	15345.3	26297.7	5773.98	12254.1	12242.8	16022.1	26324.3	6079.17	12895.4	12678	16996.4	27055.1	6546.06	13389.4	13331.8	6364.97	13406.3	13467.9	18108.2	28297.6	17600	27548	6667.42	14078.8	14029	14073.9	14437.8	18815	28533.2	18896.6
1435.32	15271.7	26497.3	5730.45	12121.6	12232.1	16622.7	27472.2	5751.23	12380.4	12272.5	17791	29339.5	6045.49	13459.9	12758.7	6119.87	12615.8	12549.1	19555.5	30656.3	19059.3	29580.9	6623.38	13589.1	13753.5	12827.9	13120.9	19655.9	30815.1	20732.2
1434.44	15073.5	26129.8	5601.88	11799.1	12006.1	16193.6	28506.5	5746.49	12330.7	12427.5	17789	30538.3	5884.85	12809.6	12923.3	5803.48	13254.4	13034.2	18062	32072.3	19419.6	32305.3	6387.33	13223.7	13874.1	13457	13604.3	18191.1	34269.7	21317.9
1433.56	15019.8	25850.4	5646.26	11839.6	12174	15613.7	27741.3	5876.31	12683.9	13060.1	15957.6	28903.9	6347.77	13327.3	13681.2	6089.8	13138.4	14305.1	16746.2	31602.9	16566.6	30342.8	6924.5	14507.7	14437.3	14261.1	14888	17787.2	33141.3	18171.5
1432.68	15295	25831.7	5628.28	11542.8	11766.7	15369.3	26668.4	5701.42	11977.2	11817.7	15970.9	27165.5	6111.62	12582.6	12638.7	5947.59	12955.5	11892	16174.4	27967.6	17476.8	28648.5	6241.2	12766.8	13161.5	13505.3	12826.9	16243.5	30621.5	18422.7
1431.8	15133.6	25552.4	5644.3	11503.9	11682.5	15259.8	27137.7	5811.38	12351.6	12600.7	16417.2	27924.4	6317.35	12820.7	13746.5	6368.98	12689.9	13725.9	17228.2	30156.4	17045.6	29183.9	6614.83	13218.8	15035.5	13442.1	14159.8	17316.3	31244.4	17400.5
1430.91	14740.1	25814.2	5677.32	11468	11640.8	15596.8	26978.4	5943.9	11699.4	11643.9	17021.6	27591.3	5962.95	12500.9	11923.9	5984.43	11721	12154.2	17585.2	29638.5	17673	28108.5	6500.99	12934.7	13104.3	12198.2	13240.7	18356	31165.6	18016.2
1430.03	14893.3	25645.5	5381.75	11338.5	11415	15029.4	27001.6	5904.59	11416.9	12419.9	16022.9	29535.7	6487.02	12500.4	13098.3	6216.1	12412.1	12738.9	17385.8	31645.8	16997	31739.8	7082.96	12678.7	13814.5	13391.9	12750.9	17900.7	32590.4	18104.3
1429.15	14924.7	25377.6	5508.26	11019.3	11234.6	15159.1	25625.3	5699.45	11774.8	11662.2	15971.1	26258.8	6071.41	12858.2	12551	6080.18	12583.5	12623.1	16427.6	26622.7	17342.7	27753.6	6634.19	13059.9	12665.4	12669.5	13150	16846.8	28868.4	18880.4
1428.27	14896.6	25398.7	5546.94	10955.1	11433.7	15072.5	27559	5755.4	11353.8	12262.5	15727.3	28426.8	6162.83	11493.7	12862.3	5922.43	11557.6	12298.5	16257.7	29823.3	17060.3	28765.5	6460.87	11563	13030.1	12030	12630.8	17008	30185	17093.1
1427.38	14492	25459.4	5248.72	11205.2	11199.5	14993.6	25604.1	5501.63	11808.8	12143.3	16275.9	25692.6	5649.13	12579.9	13213.8	5913.83	12335.9	12947.7	16741.4	27153.6	16885.7	26810.2	5738.4	12625.7	13214.4	12637.1	13866	18411.8	27274.9	18051.2
1426.5	14749.9	25347.4	5420.47	11135.3	11268.4	15008.4	27497.7	5690.72	11935.6	11581.3	16062.6	28885.7	5714.84	12754.6	12566.2	5993.29	12932.2	12081.8	17559.9	29411	17026.6	31690.9	6042.54	13804.5	13047.3	13470.5	12907.5	19009.2	30394.3	17323.4
1425.62	14965.3	25515.7	5357.27	10878.7	11243.8	15698.9	25994.6	5366.95	11476.2	11384.7	16327.6	28198.1	5417.24	12009.4	12001.2	5835.17	12261.6	11418.8	16344.3	30347	16633.1	28918.8	5755.98	12561.7	12090.9	12639.3	11961.3	17728.5	32783.2	17044.4
1424.73	14541.1	25468.8	5418.59	10828.7	11247.5	14587.3	25884.3	5554.48	11897	11693	15235.4	25896.4	5977.96	12687.3	12595.9	5942.58	12681.6	11781.5	16517.5	26101.5	15944.1	26150.4	6426.16	13333	13795.4	13142.2	12614	17227.9	26823.2	17374.9
1423.85	14730.9	25147.5	5513.84	10824	11109.7	15812.2	26594.4	5947.49	10892.8	11291.2	16358.5	27339.6	6150.17	11781.6	11568.1	6102.19	11061.5	12347.5	17655.7	29318.4	16794.7	29319.2	6478.94	11793.8	11920.1	11132.6	12538.6	18244.6	30603.2	17081.7
1422.97	14595.4	25394.9	5405.39	10952.2	11113.4	16021.5	26008.2	5466	11162.7	11989.3	17216.6	26244.6	5788.42	11801.4	12977.1	5806.01	11980.9	12250	17381.4	27374.2	18129.3	26396.2	6284.13	12785	13910.6	12363	13044.2	18588.5	28030.2	19802.4
1422.08	14598.5	25342.4	5466.67	10930.5	11122.8	15051.4	26214.6	5827.84	12019.4	11584.9	16346.6	28787.3	6264.72	12606.4	12565.6	5880.6	13188.4	11984.9	16742.2	31209.3	17425.6	30823.1	6751.1	12868.9	13154.4	13643.6	12384.9	18181.8	34127.7	19156.4
1421.2	14646.9	25321	5477.03	11208.5	11103.9	15136	27802	5691.19	11935.2	11634.9	15669	30355.8	5865.08	12813.1	11989.7	6190.88	12489.3	12287.1	16324.7	32731.7	16197.2	32830.5	6359.83	13602.9	12823.5	13693.5	13209.1	17288.9	34280.1	17450.1
1420.31	14587.8	25127.2	5422.36	11017.2	11200.9	15062.1	27480	5663.52	11851.4	11404.8	16453.8	30142.1	5772.31	11852.7	11948.2	5871.76	12562.9	11640.2	17815.3	30345.4	17620.3	30772.1	5874.06	12766.2	13117.7	13221.6	12788.9	18344.2	32772	19321.6
1419.43	14540	25131.3	5460.99	10947.4	11261.2	14548.6	26011.9	5536.09	11225.8	11987.8	15556.6	26279.7	5553.56	12341.1	12602.8	5758.63	12144.9	13177.3	17034.3	28379.6	15751	27075.4	5980.75	12793.7	12665.1	13348.1	13686.3	17803.1	29915.5	16516.8
1418.54	14602.5	25211.7	5369.61	10818.4	10925.7	14824	26203.6	5629.67	11082.8	11192.8	15563	28591.4	6049	11697.4	12310.2	5815.74	11451.4	11271.2	16068.9	29801.8	16441.3	30960.8	6481.95	11778.3	12323.2	12064.2	11870.8	17264.4	31756.9	17611.8
1417.66	14272.2	25232.8	5498.66	10833.4	11186.6	15471.9	26473.6	5829.75	11569.8	12207.4	16855.8	27694.2	5881.06	12698.3	12407.2	5914.23	11721.4	12366.9	16905.6	29453.6	18305.8	30143	6362.92	12956.1	12817.5	12259.9	13033.3	18552.3	29985	19198.2
1416.77	14563.5	25251	5545.73	10905	11162.1	14688	27646.2	5943.88	10942.2	12014.9	16071.1	28404.6	6181.15	11848.5	12083	6181.29	11035.5	12975.3	16584.1	30896.3	17275.5	29321.3	6484.69	12504.3	12671.2	12011.6	13571.5	17851.5	32849.9	17792.5
1415.89	14484.7	25116.7	5307.49	10968.1	11137.5	15640.6	27501.6	5396.6	11463.3	11726.6	15896.3	30090.8	5744.13	12322.4	12115.5	5538.03	12172	12055.8	17390.5	32765	16021.2	31985.9	6262.29	13107.4	12986.2	13237.4	12396.1	17728.7	32827.8	17514.4
1415	14507.6	25276.1	5450.6	10833.4	11070.7	15645.3	26991.4	5544.61	10978.8	11982	15770.9	28586.3	5893.21	12072	12687.7	5697.85	11593.7	12822.1	15825.3	29489.4	16070.7	31017.8	6452.62	12935.8	13861.1	11651.1	13123	17014	31236.7	16544.1
1414.12	14592.7	25062.8	5472.24	10738.4	10865.4	15451.2	26464	5972.29	10775.5	11600.3	16015.7	27103.4	6424.31	11497.1	12352.9	6303.11	11257.7	12471.8	17380	29546.1	17331.8	27713.3	6650.48	11502.9	13505.3	12380.6	13693.7	18611.4	29563.2	17907
1413.23	14705.9	25250.4	5355.54	10626.4	11032.9	15969.7	26897.3	5524.1	11121.7	11383.5	16084.5	29479.8	6038.55	12027.8	12351.8	5836.82	11768.7	12255.8	17673.8	30863.7	16890.4	29774.6	6241.78	12999.9	13226.6	12820.6	12385.9	18652.2	33420.6	18315.9
1412.35	14446.4	25277	5391.31	10878.6	10997.1	14635.5	25738.5	5844.74	10950.6	11709.6	14779.3	26298.8	6259.1	11754.6	11807.7	6060.38	11381	12454.6	14890.9	28272.2	15300.9	28267.2	6686.81	11976.2	12591.7	11462.3	12498.7	16110.9	29774.5	16719.1
1411.46	14452.4	25210.6	5438.35	10698.9	10803.3	14987.9	25773.6	5783.68	11563.9	11661.5	15255.9	26207.8	6164.47	12087.8	12760.8	5971.54	12469.8	12694.5	15834.2	27609.4	16585.9	27241.1	6212.93	13093.6	13368.7	12569.7	13699.5	16947.6	29217.5	17931.5
1410.58	14692.6	24988.9	5316.07	10722.4	10877.6	15897.6	25328.2	5411.96	11455.8	11115.1	17027.6	27109.4	5711.96	11954.3	12193.6	5934.64	11992.4	11791.8	18465.2	27624	17148.6	29798.7	6248.28	13069.7	12906.9	12430	12220.5	18818.6	29562.2	18558.2
1409.69	14515.1	25201.8	5518.27	10638.8	10935	15181.9	27046.1	5953.91	11364.1	11277.9	15564.9	29176	6515.91	12120.9	12151.7	6010.25	11511.8	12037.6	16636.6	30374.3	15870.9	31295.1	6573.6	12370.8	12758.2	11737.2	12730.6	18270.4	31954.5	16538.1
1408.8	14380	24791.2	5537.06	10741.3	10828.7	14561.9	26675.8	5853.76	11419.5	11295	14779.8	27346.3	6176.61	11854.7	11940.9	6213.43	11896	11912.2	15392.8	29056.1	15031.6	28619.1	6785.88	13023.8	12836.4	12469.4	11954.5	16096.3	30374.8	16485
1407.92	14507.2	24902.5	5333.04	10730.9	11058.1	15095.3	26377.9	5819.96	11423.8	11379.2	15945.1	27022.6	6081.04	11987.6	12409	5893.56	11570	12426.2	16707	27157.3	17081.5	28016.6	6292.62	12195.3	13060.8	11777.5	13349.5	16707.9	27966.4	18778.8
1407.03	14597.7	25126.6	5475.92	10808	11033.6	15661.8	25160.4	5697.74	10926.1	11901.7	16405.2	26833.8	5715.83	11705.1	12795.4	6252.07	11683.1	12546.1	16413.7	29375.7	17037.4	27834.1	5947.32	12459.9	13291.4	11974.6	12652.6	17783.7	31404.6	18674.2
1406.14	14462.7	25308.3	5376.29	10763.9	11051.4	15427.2	27568.6	5899.37	11512.2	11209.8	15603.2	27801.7	5912.61	12114.2	12318.9	5972.36	12032	12239.8	16203	29033.4	16144.4	29193.4	5993.08	12640.2	13275.2	12453.5	13462.7	17495.3	29501.9	17565.5
1405.26	14561.7	25126.3	5431.73	10694.3	11114.3	15755.5	26201.9	5926.74	11183	11664	16130.9	27872.2	5976.09	11785.7	11724.6	6187.13	11747.4	12531.3	16379.9	29945.5	17653.2	28801.3	6192.68	11901	12800.2	12839	13244.2	17518.6	31768.1	18879.5
1404.37	14609.9	25341.8	5430.78	11002.5	10906.7	15468.5	25902	5964.29	11377.5	11446.6	15733.1	27619.6	6028.16	12007.5	11894.9	6345.08	12462.3	12281.4	16396.2	28601.2	15855.8	28243.4	6291.63	12387.9	12036.5	12499.5	13433	16990.7	30578	17088.7
1403.48	14407.2	25283.8	5398.84	10831.5	10963.9	14508	26763.8	5859.36	11449.4	11498.9	14575.9	28249.8	6083.8	12008.7	11956	6070.37	12217.5	12406.4	15970.3	28251	15708.1	28811.7	6415.85	12602.3	13021.2	12865.8	13489.5	16676.8	29774.8	15757.2
1402.59	14314.6	25248.4	5440.16	10849.3	11015.6	15496	25862.7	5794.44	11847.5	11222.8	16196.2	27438.6	6003.52	11976.6	11944.6	5848.39	13002.8	11902.4	16756.2	28214.3	16961.1	28996.5	6411.75	12336.8	12113.9	13052	12356.9	16851.4	30426.1	18227.5
1401.71	14731.8	25120.1	5484.29	10858.7	10793.9	16102.9	25618.9	5851.58	11009.4	11167.6	16173.7	27809.7	6076.31	11848.5	11439.6	6319.85	11371.9	11326.2	17455.4	29812.3	17242	28066.8	6213.86	12182.8	12379.9	11710.4	11685.3	18336.5	31067.9	17719.1
1400.82	14284.3	25346.7	5404.48	10640	11101.8	15193.7	25559.9	5847.38	10831.4	11490.3	16516.4	25597.4	6190.26	11539	11774.6	6282.7	11521.8	12350.9	18123.4	25691.6	18152.7	26409	6254.87	12279.5	12829.4	12423.1	12428.4	19518.1	27880.4	18910.8
1399.93	14608.4	25373.2	5527.43	10770.5	11209.7	15637.2	25437.1	5611.82	11393.5	11855.5	17093.7	25949.5	6133.92	12425.6	12417.4	5615.64	12260.9	12563.2	17894.4	27568.8	18523.9	28439.3	6166.24	13638.6	13071.5	12858.4	13604.2	18894.4	29186.3	19285.9
1399.04	14442.6	25031	5433.56	10805.2	11013.5	14833.4	25149.5	5828.07	11772.4	12012.3	15855.8	25867	5962.42	12832.8	12670.6	6363.34	11946.5	12615.1	17039.2	27205.2	16694.7	28071.5	6479.97	12887.8	13857	12980.2	13101.6	18446.2	27603.1	16751.9
1398.16	14518.9	24967.5	5455.14	10789.2	11090.4	15917.6	26888.5	5596.3	11303.1	11572.9	16174.4	27218.8	5815.78	12036.1	11960.5	5681.74	11443.5	12392.9	16546.3	27258.9	17639.1	28789.5	6058.07	12987.8	12660.4	12515.6	12561.3	17576	29404.7	19040.9
1397.27	14609.2	25157.4	5535.8	10536.9	11203.9	15131.9	25847.9	5666.15	10643.2	11737.5	15372.5	26145.4	5862.08	11429.2	12226.9	5787.16	10649.2	12277.5	15838.7	27108.9	16782.1	27193.5	6293.98	11954.5	13403.1	11454.8	12919.1	16630.5	27244.8	17681.3
1396.38	14508.2	25198	5458.86	10656	11013.4	15326.4	26173	5497.54	10672.8	11880.4	16472.1	27260	5770.3	11549.9	12741.1	5868.69	11338	12790	17978.5	27514.7	17439.3	29708.2	5784.14	11984.3	13016.9	11740.2	13300.2	19152.6	28921.4	19098.4
1395.49	14449.4	25151.4	5545.13	10898.9	10944	14544.3	27577.9	5978.34	10919.4	11505.2	14988.9	29737.8	6493.79	11558.8	12173	6054.87	11644.1	12646	15140	30679.5	15842.1	32013.6	7032.19	12231.6	12338.5	12563.6	12678.4	16573.3	33035.2	17062.9
1394.6	14669.1	25217.4	5544.16	10849.2	10703	15784.2	26012.7	5834.12	11824.1	10741.7	16963.6	26570.6	6094.72	12215.9	11546.4	6385.22	12451.4	11309.3	17107.1	28893.5	17291.7	28552.8	6636.85	12982.9	12208.9	13028	11932.6	18678.4	29973.8	18089.5
1393.71	14438.8	25047	5425.08	10791.1	10962.7	15841.8	26318.7	5474.8	11382.5	10968.8	15940.7	28449.9	5739.6	12312.8	12022.5	5484.15	11870.3	11925.3	16448.3	30761	17143.7	28984.5	5905.21	12866.9	13074.9	12354.5	13076.6	17010.8	32065.2	18594.5
1392.82	14655.6	25048.3	5438.19	10662.7	11182.9	15258.9	25743.1	5923.26	10959.9	11979.3	15405	28263.4	6475.59	11293.1	12909	6101.24	11210.4	12583.9	16684.2	30101	15822.2	30450.9	7085.51	12395.4	12994	11487	12809.7	17906.1	30923.8	15874.4
1391.93	14650.2	25415	5282.62	10793	11020.7	16014.9	27416	5634.46	11556.9	11257.2	16693.1	28972.4	5912.08	12129.9	11263.7	5678.38	12664.6	11407.7	17911.9	30575.9	17297.4	29139.8	5926.43	12647.8	12089.4	13633.3	12373.6	19284.8	31698.7	18629.6
1391.04	14420	25149.2	5478.46	10813.6	10999.1	14508.3	25778	5808.48	11330.9	11932.4	14744.7	25836.2	6035.95	12118	12154.1	6316.87	12038.1	12061.3	14956.7	26234.5	15476.4	27972.8	6383.59	12216	12189.8	13205	12509.2	15949	27602.6	15679.3
1390.15	14552.4	25335.9	5396.01	10761.1	11075.9	14811.6	27412.6	5431.46	10832.8	11947.2	16154.8	28449.7	5569.91	11185.5	12387.5	5825.25	11863.2	12596.5	16908.9	28460.4	17412.2	30035.2	6088.7	11989.5	12821.9	12875.4	13190.8	17940.2	30040	17662
1389.27	14375.6	25517	5510.27	10660.9	11161	14816.1	27357.9	6021.33	10775.9	11936.7	14944.2	28440.6	6288.11	11660.2	12487	6587.26	11583.2	12778.7	15254	29411.3	15744.6	29281.9	6773.03	12730.9	13007.2	11788.2	13416.2	16454.2	30509.3	17318.8
1388.38	14625.9	25419.8	5444.7	10681.5	10830.4	14961	26446.4	5658.65	11427.9	11790.7	16222.7	26497.1	5782.32	11572.3	12301	6051.3	12003.2	12731.6	16801.9	28445.4	16719.4	27931.6	5986.83	11808.8	12620.5	13010.3	13992.6	18481.2	29134.3	17284.5
1387.49	14609.4	25384.5	5429.7	10898.7	11061.7	14694.5	26785.5	5955.16	11858	11681.6	15235.1	28051.3	6517.98	12036.3	12769.3	6072	12923.1	12066.4	16632.3	29363.5	15466.2	30213.7	6956.41	13011.6	13919.1	14166.7	13105.3	17369.9	29616.7	15602.5
1386.6	14362.5	25020.6	5546.71	10888.4	11014.8	15092.6	27308.6	5796.62	10910.8	11827.5	15928.5	29397.4	6122.32	11925	12774.4	6031.99	11591.5	12959	16189.7	30198.1	17389.5	31821.7	6296.34	12818.4	12981.9	11668.5	14030.3	16661	31002.5	17955.9
1385.7	14525.6	25151	5540.13	10791	11015.7	15908.6	26841.9	5606.74	11099.5	11956.5	16900.1	27971.1	5819.83	11424.4	12550.3	6135.79	12186.6	12113.1	17388.1	28747.9	18548.2	29768.7	6168.09	12439.9	13581.3	12833.3	12273	17888.8	29641.2	20020.4
1384.81	14649.5	25118.6	5550.4	10957.6	11019.4	15097.4	27204.5	5667.38	11701.1	11641	16543.3	28520.8	6147.09	12657.2	12523.8	6157.22	12448.8	11982.2	18164.7	28976.6	16604	29143.4	6187.76	13748.1	13340.4	13374.4	13179.1	19895.4	31457.7	17173.5
1383.92	14812.5	25027.2	5420.31	10815.4	11084.8	15709.4	25703.7	5462.91	11353.2	11194	16996.2	28154.2	5845.22	12373.5	11423.2	5692.33	12041.5	12171.3	17709.5	30812.5	18288.4	30574.4	6368.83	12874.4	11608.6	12521.8	12739.4	18326.3	31398.5	18873.2
1383.03	14520.9	25331.5	5377.26	10684.4	11040.8	15956.4	25773	5907.31	10863.5	11681.2	16498.6	25827.5	6015.81	11949	11754.6	5953.66	11496	12845.8	16553	28005.5	17388.2	26996.7	6196.78	12830.7	12225	12000.4	13365	17147	28568.4	18811.3
1382.14	14540.8	25279.4	5567.14	10777.9	11266.2	15826.3	27605.8	5707.97	11407.7	11623.1	17379.5	28138.2	5821.7	11930.8	11811.6	5718.19	12091.8	11938.5	19016.1	30771.4	18727.4	30588.6	6225.92	13039.6	12681.8	12391.5	12941.4	19495.1	33194.5	19167.4
1381.25	14633.6	25143.1	5459.56	10602.1	11143.6	15495.1	26103.2	5739.8	11411.5	11489.1	15732.3	28448	6212.41	11549.2	11530.6	6296.89	11626.9	11522	15922.7	29143.9	16431.7	30463.1	6502.77	11852.1	12679.1	11981.1	12495.9	17343.7	31356.5	16583.9
1380.36	14561	25231.3	5531.54	10774.2	11211.7	15978.6	27353.6	5916.24	11328	12237.6	16203.1	28681.2	6426.54	11699.5	12769.7	6003.35	12144.4	12702.5	17156.5	31265.8	17737.3	29244.2	6998.87	12550.5	13445.7	13165.6	13382.6	17727.7	33263.2	18797.3
1379.47	14600.5	25355.9	5477.29	10766.7	11072.4	15952.3	27889.3	5715.54	10776.2	12020.4	16025.2	29452.7	5820.29	11108.1	13035	5853.75	11683.6	12162.6	16089	30732.9	16966.2	29899.4	5835.82	11189	13260.3	12041.3	12352.2	16685.5	32812.5	18298.2
1378.58	14993.3	25348.7	5420.25	10680.7	11070.4	15633.8	26876.8	5893.6	10930.9	11290.6	16282.6	28484.5	5911.68	11739.6	11802.2	6431.47	11566	11823.8	17188.4	30004.6	16361	29236.1	6243.21	12597.7	12082	12162.5	11862.6	18008.4	31420.5	17182.9
1377.68	14570.2	25392	5517.43	10805	10942.3	15087.5	25451	5723.75	11355.7	11648.2	15302.8	27307.2	6112.49	12250.3	11659	6039.16	11371.2	12000.8	16476.3	28340	15323.4	29487.4	6575.78	12982.1	12140.7	11493	12864.9	17929.3	31123	15536.8
1376.79	14822.7	25474.4	5499.65	10960.1	11198.3	15178.3	25505.3	5723.08	11505.5	11344.1	16324.6	27421.6	6252.06	11622.4	12048.5	5836.7	11578	11611.9	17809.8	29957.3	17879.3	28798.5	6641.56	12000.2	13220.2	12023.5	12382	19112.5	31967.2	19605.9
1375.9	14377.3	25321.4	5568.76	10876.9	11314.1	14451	25776.5	5952.97	10997.1	11586.9	15666.5	26743.9	6069.42	11336.2	12738.8	6027.67	11558.7	12477.1	15674.6	28581.6	16812.7	27923.3	6628.78	11498.6	13005.8	12487.1	13477.9	15884.7	29558.9	16972.1
1375.01	14935.2	25196.5	5651.85	10897.4	10989.9	14986	26720.5	5710.9	11563.3	11063.3	16158.5	28183.9	5829.6	12384.7	11437.4	6121.77	11825.3	11528.3	16645.4	30291.8	16252	29038	6210.32	12556.5	11991.1	12541.8	12215.5	18001.4	32884.3	16259.7
1374.12	14644.1	25043.7	5510.78	10906.7	11181.3	16077.7	26914.4	5867.51	11838.9	11248.7	17434.6	28086.4	6426.36	12121	11373.9	6437.58	12632.3	11450.8	17707.3	29904.8	19039.1	28896.1	6499.48	12392.6	11418.5	13729.2	11544.7	18917.3	32411	20281.2
1373.22	14927.2	25176.5	5563.04	10829.2	11271.7	15830.3	26561.7	5947.59	11526.1	11722.7	15966.8	28293.2	6025.9	12277.9	12534.5	6282.29	11818.6	12227.3	16238.5	30577.4	16876.1	29251.4	6175.89	12717.7	12890.4	12312.5	13246.4	16941.7	31628	17077.1
1372.33	14742.6	25499.8	5732.91	10939.3	11082.1	14958.9	27329.4	5981.82	11702.5	11181.4	15071.9	29421.5	6137.3	12460.9	12182.4	6405.5	11897.8	11987.2	15383	30522	15425.6	30052.2	6389.95	13112.9	12474.7	12926.5	12918.5	15426.8	31331.4	15545.3
1371.44	14857.6	25680.2	5625.5	10819.8	11116.6	15102.6	27904.8	5892.39	10947.3	11975.5	15886.9	28249.8	5990.55	11223	12883.2	6069.31	11222	12291.7	17189.8	28368.5	17429.9	28295	6486.68	11669.4	13769.9	12096.2	12722.6	17469.8	31176.4	18851.7
1370.55	14687	25359.4	5616.12	11117.5	11240.6	16126.2	25450.3	5744.08	11634.6	11820.5	17295.7	25779.7	6167.92	12398.5	12337.6	6165.84	12334.6	11907.6	18796.3	28201.8	17999.3	26207.7	6257.87	13278.5	13043.3	13422.3	12557	19646.8	28296.5	18831.9
1369.65	14748.9	25371.7	5640.34	11006.4	11140.7	15747.5	26947	6069.35	11944.4	11850.5	16796.5	28829.5	6093.4	12505	12725.8	6476.9	12608.2	11996.5	18039.3	31092.4	17478.4	31676.5	6172.93	12553.7	13371	12999.8	12022.9	18196.2	34062.3	18281.3
1368.76	14933.8	25689.1	5555.39	10844.9	11231.1	15116.1	26260.1	5846.95	11919	12146.8	16209.3	28599.5	6381.09	12802	13249.2	6010.79	12456	12362.1	16667.1	30920.9	17422	30884.8	6957.27	13489.2	13269.1	13102.2	12594.7	18048	32593.1	17621.3
1367.87	14922.8	25388.1	5504.06	11066.9	11352.3	15579.9	27312.9	5819.59	11345.9	12317.8	16997.1	30028.6	6359.57	12056.9	12689.1	5943.38	11554.7	12747.7	17082.9	32724.9	17807.5	31568.7	6889.23	13255.9	13512.1	11856.9	13452.9	18282.3	34639.1	19114.3
1366.97	15026.5	25730.5	5553.45	10955.8	11294.4	15632	27039.3	5832.67	11147.5	11337.8	17164.5	29062.1	6180.02	11162.3	11446.6	5952.82	11579	11415.1	17471.7	30118.9	18673.7	29467.7	6402.75	12125.9	12583.2	12427.8	12527.8	17626.2	30950.2	18966
1366.08	14839.3	25398.8	5681.16	10931.5	11172.1	16070	27333	6009.05	11183.5	11629.7	16806.3	29218	6112.73	12246.6	11759.3	6194.77	12250.7	12169.2	17175.2	30643.9	16823.1	31616.2	6573.76	12710.4	12573.2	12289.6	12402.6	18599.1	31250.6	18454.7
1365.18	14892.6	25584.5	5545.92	11198.1	11354.7	16235.3	27216.3	5792.63	12091.8	12230.7	16390.3	28147.7	6285.68	12350.5	13172.7	6325.71	12634.8	12820.7	16914.9	30846	17193.1	30354.3	6353.88	12759.1	14297.4	13745.7	12866.3	17565.2	32419.6	18106.5
1364.29	14775.4	25798.2	5704.34	11207.4	11372.3	15387.6	28267.2	6070.62	11414.4	11506.3	15594.3	29510	6136.32	11423.9	12232.4	6232.22	11473.6	12605.9	16182.7	29772	16917.7	32406.9	6268.15	12562.9	13015.7	12361.1	13079.8	16504.2	30731	18581.1
1363.4	15234.1	25698.6	5644.64	11023.7	11283.7	15978.2	27399.7	5862.07	12086.6	11638.7	16278.8	29362.7	5963.85	12933.6	12213.3	6347.22	13067.1	12678.7	16723.3	32085.9	16314.8	30790.1	6280.23	13616.9	12896.4	13513.8	13889.4	17046.1	33405.5	16856.5
1362.5	15044.1	25696.9	5590.54	11273.3	11312.5	16085.5	27256.1	5979.4	11572.1	11532.6	17184.8	28210.1	6416.29	12185	12652.2	6348.84	11725.1	11821.4	17691	29934.6	17336.6	29182.9	6878.29	13101.2	13206	11796.9	12769.1	18624.5	31299.9	18770.7
1361.61	15086.2	25714.8	5684.59	11436.2	11397.1	15841	26634.7	6116.57	12319.6	11423.6	16661.1	28014.4	6276.79	13143.9	12371.9	6502.44	12443.5	11660.3	17276.9	28117.3	17845.5	28830.6	6350.61	13428.6	12995.3	12917.9	11917	18641.8	30744.8	18020.5
1360.71	15192.6	25559.4	5504.76	11280.6	11364.4	15735.8	25687.8	5570.97	12226.8	11368.2	16822.5	26152.4	5960.02	13268.3	12234	5948.41	12783.4	11428.8	18352.9	26754.9	18395.9	27591.9	6258.16	13347.4	12780.1	12786.5	11498.2	19606.1	26835.2	19982.1
1359.82	14924.5	26069	5769.21	11303.7	11351.2	15360.3	27115.8	5871.05	11527.3	12280.8	15735.8	29435.3	6071.65	12623.9	12570.6	6413.3	12210.3	12469.8	16473.3	30247.3	15840.6	31936.4	6153.5	12689.4	13483.6	12468.6	12869	16990.5	31763.6	15925.1
1358.92	15212.4	26003	5812.9	11410.7	11254.3	15871.5	26210	6055.43	11507.8	11424.3	17165.9	27837.7	6062.04	12601.3	11729.6	6487.94	12530.9	11997.3	18326	27840.9	18734.9	28838.5	6602	13286.8	12156.2	13656.6	12576.4	19535.2	28552.8	20247.1
1358.03	14894.2	25601.9	5850.98	11433.9	11567.9	14904.8	26460.6	6203.26	11851.5	11868.5	16350.6	28900.5	6704.87	12694	12597.9	6379.31	12904.5	12874.7	17781	31470.3	17905.6	29945.8	6767.47	13801.9	13817.6	13888.7	13707	18228.4	31660.9	18785.6
1357.13	15360.7	25882.2	5665.67	11451.4	11362	16554.6	27258.1	5744.72	11954.7	12234.8	16650.6	27420.3	6020.35	12730.1	13454.3	6139.33	12217.5	13363.9	17602.8	27600.5	17977.8	27449.2	6523.83	13011.2	14113.5	13139.5	14448.1	18268.8	29711.2	18006.9
1356.24	15246.3	25964.3	5737.26	11491.3	11639.2	16373.8	26259.4	6088.87	11940.4	11836.7	16381.8	27573.7	6467.04	12817.2	12288.6	6290.81	12189.7	11940.9	17520.7	29570.7	17389.1	27689.3	6527.76	13433.8	12836.2	13329.5	12482.3	17725	31788.1	17479.5
1355.34	15193.4	25689	5674.85	11405.5	11559.1	15508	27344.3	6122.61	12336.4	12699.7	16800.9	29741.6	6197.93	13118.2	12881.7	6658.12	12361.7	13338	17719.8	32699.6	18345.1	30879.4	6764.72	13504.7	14132.1	12865.5	14607	19398.7	33271.1	18449.1
1354.45	15118.2	25916.1	5712.93	11582.2	11484.5	15456.3	26965.5	6231.26	12717.6	12360.2	16031.8	29384.6	6631.79	13921.7	13429	6398.61	13849.2	12667.9	17441.6	29562.6	16569.8	30026	7091.96	14835.7	13777	13853.7	13516.9	18649	31379.1	17243.2
1353.55	15165.8	26104.1	5790.07	11582.9	11697.3	15899	26498.7	6048.95	12645.4	12784.6	17160.5	26920	6297.32	13503.1	13477.4	6250.05	13268.2	12799.4	18671.9	29431.3	18507.4	26935.3	6593.22	14018.5	14680.3	13490.5	13482.3	18955.2	32177.8	18667.3
1352.65	15341.7	26414.8	5853.22	11516.7	11689.7	15824.7	26742.4	6163.55	11738.6	12559.9	17094.7	29255.7	6774.38	12221.4	13135.8	6327.43	12637.5	12948.2	18127.2	31580.4	18740.6	31109.5	6921.05	12536.8	14357.8	13048.1	13623.8	18336.2	32393.7	20050.1
1351.76	15138.2	26321	5682.05	11506.4	11531.5	15943.4	28556.4	6065.77	11627.4	11595.5	16456.7	28862.3	6095.86	12005.6	12631.2	6259.27	12688.6	12581.7	17209.5	31370.6	17727.8	29728.7	6153.71	12990.6	13196.2	13606	13525.7	18383	33591.2	18750.9
1350.86	15185.7	26216	5837.23	11666.1	11869.7	15522.9	27794	6309.76	12537.8	13001.7	15701	28523.8	6332.28	12840.6	13595.8	6370.48	13328.7	13953.1	15974.4	30931.7	16530.9	30048.6	6804.38	12874.1	14651.4	14508.1	15340.2	17073.3	33853.7	17234.4
1349.96	15615.3	25985.5	5827.85	11689.2	11803.5	16436.8	26031.7	6012.43	12758.9	12386.1	17293.7	28063.2	6402.05	13881.9	12609.7	6153.87	13182	13552.6	18896.2	28911	18086.7	30500.1	6582.79	14099.6	13652.5	13547.7	13965.5	20156.3	31360.3	19293
1349.07	15662.7	26123.2	5929.99	11664.8	11904.6	16370.8	26233.6	6133.15	11962.9	12945.1	16395.3	27603.9	6618.77	12812.4	13221	6214.88	12040.6	13029.9	17217	28078.3	17178.2	28516.4	6914.13	12989.7	13837.1	12050.4	13566.2	17691.5	30592.9	17834.7
1348.17	15671.2	26235.7	5820.24	11824.4	12217.5	16973.8	28321.9	6322.21	12210.1	12667.8	17906.9	30965.1	6783.91	12754.9	12806.9	6657.18	12920.7	13674	19327.7	32148.5	18020.8	32401.3	7295.14	13831.6	13687.8	14001.1	14987.7	20614.8	34589	18114.4
1347.27	15517.9	26130.8	5858.24	11802.9	12017.5	16225.4	27060.2	6087.95	12126	12131.3	17694.9	27771.2	6321.84	12734.5	12237.2	6488.15	13033.5	12944	18224	30021.9	18376.3	27835.4	6572.01	13539.8	12715.6	13730.1	13504.5	19986.3	30829.7	20095.2
1346.38	15955.5	26427.1	5717.89	11984.7	12015.4	17043.4	28948.5	6236.36	12903.3	12349.5	18553.7	29962.2	6528.74	13350.9	12759.4	6404.38	13812.9	13177.4	19884.5	30657.7	20293.7	32397.5	7160.85	13906.8	13483.6	14494.8	13319.5	20727	32777.4	21488.9
1345.48	15715.9	26606.4	5934.2	11985.4	12043.9	15904.7	27516.6	6472.35	12454.4	12536.1	16889	30024.5	6511.48	13197.1	12695.6	6588.75	12934.5	13185.4	17722.4	32144	17946.3	30115.6	6516.03	14145	13341.1	13050.6	13556.8	18799.9	34989.1	18094.7
1344.58	15651.9	26562.7	6050.16	12086.4	12022.3	16448.9	27911.6	6530.4	12538	12698.1	16770	28316	6722.9	12893	12708.9	6561.93	12587.4	13450.7	18409	29031.5	17911.7	29779.7	7372.85	14051.2	13574.4	13776.7	13837.3	19129.8	30030.2	19159.2
1343.68	15721.5	26591.5	5985.04	11908.8	12265.3	16455.6	27996.4	6102.85	12428.6	12576.8	17360.4	29398.4	6561.26	12771.6	12647.7	6126.56	13331.4	13105	18985.6	31204.7	17469.4	30959.5	6951.66	13446.9	12730.3	14500.9	13292.1	19346.5	33418.1	17676.2
1342.79	15755	26288.9	6061.96	12190.8	12123.9	16896.5	26294.2	6637.22	12586.3	12994.2	17578.2	26579.5	7266.72	12828.3	13909.3	7028.16	12791	13535.5	18251.7	28774.8	18715.9	28670.6	7479.66	13338.5	15171.9	13226	14118.9	19444.6	29089.8	18854.6
1341.89	16005.6	26688	6111.02	12202.5	12080	17352.9	28002.2	6274.34	12544.5	12397	17362.1	30784	6444.07	13755.3	13368.8	6340.45	12777.5	13319.8	18149.6	33263.7	18124	31098.3	6611.26	14098.4	14038.7	12899.1	13607.3	18552.4	35926.3	18343.1
1340.99	15799.6	26722.3	6123.87	12386.9	12517.7	17253.1	28702.5	6202.44	12592.2	12962.6	17663.5	29991.8	6708.37	13385.4	13697.3	6415.85	13770.4	13826.5	18112.4	30315.2	17710.2	32425	7350.16	13899.6	13951.9	14794.3	15014.1	18408.3	33235.3	18530.5
1340.09	16058.4	26670.3	6142.28	12292.9	12256.7	16539	27862.7	6278.39	12833.4	12524.4	16596.4	29031.7	6504.22	13022.3	12990.3	6641.75	13901.7	12849.9	17692.2	29995.1	17389.6	31874.4	6646.96	13486.6	13674.1	14026.5	12906.7	19148.1	32896.7	17764.8
1339.19	16030.6	26557.2	6063.29	12338.1	12413.2	17367.9	29137.1	6617.36	13367.2	12640.6	19092.9	29698	6740.81	14639.2	13827.1	6854.43	13751	12945.9	19881.8	29785.9	20194.1	30946.1	6807.86	15975.1	14203.2	14159	13321.9	20319.4	32307.9	22211.4
1338.29	16022.2	27273.1	6039.97	12269.1	12143.9	17624	27908	6487.85	12530.7	12357.1	19153.8	28415	6868.2	12679.8	12691.7	6530.93	13142.5	12801.2	19979	28866.8	19289.2	31040	7043.98	13724.3	13552.6	13148.1	13737.1	20644.7	28873.9	19801
1337.4	15927.6	26764.8	6077.86	12294.8	12445	16588.1	29075.9	6655.81	13270.8	12978.8	17202.8	29959.8	7162.84	13654.5	13112	7017.04	13896.2	13964.2	18038.4	30080.2	18775.8	32181	7655.77	14843.8	13385.6	14058.6	14420.6	19197.7	31957.2	19651.2
1336.5	15910.9	26732.3	6101.83	12392.8	12306.6	17041.8	28693.9	6261.47	12475.2	12346.7	17186.9	30317.7	6823.98	12493.7	13563.4	6390.09	12739	13076.6	17826.4	32583.2	17433.1	31046.9	6957.49	12898.1	14734.4	13500.6	13167	18594.9	33226.1	18380.2
1335.6	16011	27100.3	6237.01	12496.3	12154.2	16989.9	27153.3	6675.71	13639.1	12845.9	17160.8	27596.4	6971.5	14042.2	13569.1	7011.36	13765.6	13154.5	18360.5	29940.2	18627.1	29947.9	7280.04	14418.8	14455.1	14441.8	14109.3	20136.9	30254.7	20282.3
1334.7	15897	26720.2	6052.43	12432.9	12074.3	16040	29386.4	6144.01	13100.5	12659.9	17206	31987.4	6297.23	14357.9	12926.8	6614.07	13165.1	12661.5	17246.3	32828.7	18735.8	33639.5	6850.68	15303.5	13721.7	13819.9	13298.1	18572.1	35078.3	20249
1333.8	16052.7	26796.2	6159.78	12300.1	12319.6	16524.7	28062.4	6697.61	12881.6	12887	16794	28669.2	7281.39	13986.6	13256.4	7195.46	12960.4	14109.8	17767.9	31444.3	17396.3	30796.5	7959.32	14410	13929.7	13756.3	14903.5	18618.4	31493.3	18639.2
1332.9	16122.1	26697	6044.76	12431.4	12261.8	17675.8	29108.3	6405.7	13259.4	13004.1	18051.5	31364.6	6924.93	13672.7	14240	6861.1	13313.4	13773.2	18707	32823.4	18951.4	33084.1	7598.11	15005.3	15598.6	14022.2	14077	20074.3	33064	20259.5
1332	16061	26859	6185.41	12162.4	11995.7	17093.7	26951.4	6552.85	12929.8	12012.1	18051.2	28136.9	6857.58	13171.7	12196.6	6609.31	13987.2	12690.9	18091	30677.8	19566.9	29245.5	7345.64	13460	12650.7	14823.8	12728.3	19454	30944.5	19651.3
1331.1	15980.4	26896	6064.87	12296.4	12302	17451.6	28610.1	6090.57	12768.3	12727.1	18268.8	29466.3	6535.83	12838	13499.5	6609.05	13149.5	13185	18317.8	32116.1	19224	31268	6641.38	13671.7	13550.9	13507.1	13408.7	18473.3	33308.8	20101.2
1330.2	16133.1	26960.7	6091.58	12355.4	12285.9	17489.9	27216.8	6357.37	13086	12594.5	17965.2	27360.6	6945.84	13247.3	13548.8	6895.98	13722.6	13504.5	18772.9	28372	18775.8	28183.2	6977.92	13353.6	14491.9	13851.3	14761.7	19447.1	28694	19158.2
1329.3	15722	26894.9	6029.42	12350.4	12400.4	16087.1	28858.3	6412.44	12816.4	13498.8	16324.6	30648.6	6648.67	12916.7	14102.4	6679.68	13037.3	14530.1	17460.9	32585.7	17394	31416	7142.75	13324.5	14339.8	13228.1	15823.6	18904.5	33703	18968.3
1328.4	15852.6	26831.9	6158.87	12245.5	12414.9	16375.1	27849.5	6226.61	13442.4	12818.1	17424.4	29542.2	6280.4	14463.3	13188.2	6817.51	13715.1	14094.2	18408.6	32020.7	18475.4	29653.2	6698.83	15549.7	13305.6	14002.3	14915.7	19775.1	32085.8	19214
1327.5	16019.1	26710.6	5985.66	12332.2	12171.2	17093.1	29232.6	6529.28	12858.1	12275.2	18624	30283.5	7020.44	12908.2	13394.8	7146.25	13490.1	13036.9	20141.4	31719.9	19927.9	32270.4	7503.21	13072.2	14669.4	14152.5	14084.5	20799.1	33353.6	21855.5
1326.6	16052.4	27039	5984.62	12069.2	12188.5	16478.5	28109.1	6440.45	12361.9	13283.2	17082.8	30166.5	6868.12	12364.9	14051	6507.43	13482.9	13442.7	18394.8	31330.8	18007.6	32243.1	7188.13	12857.5	15416.5	14408.8	13491.2	19303	33633.1	18253.5
1325.7	16313.3	27300.7	6194.49	12325.2	12419.5	17848.8	29081.9	6527.47	12414.7	13622.5	19630.3	30776.5	6679.86	12730.5	14527.3	6585.74	12449.7	13934.5	21320.9	32126.6	21111.6	32762.2	6889.5	13540.9	14675.1	12570.2	14159.7	22087.7	32604.2	21584.6
1324.8	16171.7	26907.5	6032.47	12503.4	12350.7	16385	28164.1	6358.07	13334	13158.8	17962	30196	6745.38	13811.3	13367.3	6512.75	14184.7	13329.6	19002.7	32295.7	19010	31432	6819.99	14926.4	14352.1	15228.6	13819.3	20541.1	33853.3	20609
1323.9	16113.4	27038.7	6294.97	12445.7	12362.5	17711.8	27165.4	6874.19	12588.2	12891.9	18776.2	28627.7	6916.89	12828.9	13606.5	7397.61	13512.6	13811.1	18908.2	30871.9	20203.2	29915.9	7029.43	13320.8	13730.4	13860.2	14256.5	20319.3	32378.4	21320
1322.99	16096.7	26950.8	6052.55	12471.2	12329.8	16784.3	27842	6276.96	13565.7	12998.2	18303.4	29559.9	6524.08	13820.8	13550.8	6370.2	13788	13303.4	18739.8	30529.4	18871.8	30272.7	6919.84	15055.3	14522.6	13802.8	14455.9	19493.4	31217.2	20116.5
1322.09	16268.6	26665.9	6026.53	12405.3	12460.7	17098.1	27956.5	6565.06	12830.3	13662.5	17779.5	29375	6851.08	14024.1	14149.7	7061.64	13980.4	14446.8	18057.2	30660.5	18651	30929	7517.17	15193.2	15398.9	15231.6	15403.1	18559.9	33150.5	19773.5
1321.19	16099.4	27204.7	6108.66	12425.3	12527.9	16406.5	27984.9	6457.52	13664	12777.7	17451.9	30058.8	6831.59	13700.6	13644.9	6738.34	14885.8	13790.7	17984	32364.3	18326.3	31027.2	7467.16	14937.5	14939.2	16201.2	14401.9	19527.2	34730.8	18362.3
1320.29	16013.4	27333.1	6107.59	12234.6	12453.6	17596.8	27809.9	6142.42	12768.3	13470.7	19264.2	27969.2	6200.65	13505.1	13515.1	6162.47	12816.4	13936.5	20845.2	28950.9	19447	28376.8	6328.56	14089.8	14038	14018.1	14311.7	22563.6	31817.3	19815.5
1319.39	16157.5	27159.2	6206.31	12470.8	12584.5	17047.7	27529.5	6255.94	13603.8	13057.3	17958.4	28713.1	6504.23	13614.5	13245.6	6473.38	14855.7	13501.9	18345.7	30383.5	19722.8	30753.7	7143.62	14777.7	13927	15415.1	14644.5	19028.4	31307.4	20396.6
1318.49	16099.2	27151.7	6055.56	12562.9	12598.9	16783.5	28552.6	6557.91	13158.3	13261	17791.7	31029.8	7014.48	13191.7	13336.2	7119.11	13206.2	13911.7	19367.3	32145.9	18629	33699.7	7260.5	13279.2	13644.5	14358.4	14083.6	19372.9	33752.9	18687
1317.58	16162.9	27554.2	6107.15	12436	12477.5	17010.8	30026	6661.56	12732	13300.5	17781.7	31970.1	6809.24	12882.5	13924.3	6994.87	12744.7	13867.2	18482.6	32546	18283.9	32459.3	7025.67	13017.3	13932.5	13686.8	13959.4	18896.7	34245	18776.2
1316.68	16309.7	27014.7	6272.31	12456	12342.4	17538.6	28865	6406.21	13546.3	13259.7	18306	29346.9	6539.87	14837.7	13910.5	6469.67	13548.4	13482	19172.6	31100.9	19788.7	29963.3	7186.62	14976	14011.7	13705.5	14805.9	20510.2	31576.1	21206.2
1315.78	16367.8	27101.4	6185.34	12714.2	12542.4	16508.9	27762.2	6522.37	13367.5	13273.9	17816.8	30090.7	6967.05	13929.3	13415.4	6831.28	13694.8	14276.9	18992.9	33058.7	18201.3	32557.5	7605.5	15151.2	14285.7	15028	15050.2	20468.4	34930.9	19527.7
1314.88	16265.2	27373.6	6209.18	12429.4	12484.8	17321.9	28363.9	6357.63	13219.1	13666	17542.4	28434.4	6573.91	14157.1	14273.3	6468.44	13724.5	13787.3	19080.7	29846.3	18464.5	31225.4	6693.03	15053.9	14645.6	13933.1	14381.4	20753.3	30778.2	20017.1
1313.97	16309.4	26995	6183.18	12568.5	12482.6	17368.3	27546.6	6756.04	13795.1	13047.1	18123.9	29304.2	7178.23	13973	13619.4	7393.36	14088.9	13068	19784.3	29884.2	19660.8	30546.9	7662.83	14428.8	14201.1	14488.3	13491	21075.5	30969.9	20963.2
1313.07	16195.8	26907.2	6137.8	12414	12555.2	16876.4	27631.5	6504.81	13018.5	13278.9	17208.2	29728.6	6685.93	14078.3	14308.8	6740.34	14319.9	14605.4	18129.2	32399.1	18748.3	31663.1	7140.69	14474.7	14558.6	14884	15778.3	18943.5	33222.1	19819.6
1312.17	16029.7	27104.5	6142.26	12428.5	12625	17385.5	28477.7	6188.47	13380.9	13272.5	18369.2	30197.3	6579.84	14288.2	14472.5	6397.73	14308.5	13363.7	19405.1	33058.1	19310.9	32035.5	6686.21	14993.1	15023.5	14846.1	13801.1	20409.4	35928.8	20044.4
1311.26	16204	26978	6362.58	12628.3	12545.3	16582	27650.3	6716.44	13806.7	12805.7	17589.9	27775.2	7374.13	13879.6	13448.1	7003.61	14615.5	13140.6	18646.1	28395.2	18465.9	28612.6	7564.63	15147.8	13877	15093.8	13761.3	18857	30548.7	19100.9
1310.36	16217.7	27225.1	6051.56	12534.8	12556.9	17176.5	28725.5	6269.52	12631.2	12982.4	18620.7	31233.5	6347.59	12703.4	13698.3	6517.89	12878.2	13830.4	19547.5	32983.8	19402.9	31855.7	6633.05	13713	14436	14146	14044.5	20603.8	34674.5	20001.5
1309.46	16148.5	27023.9	6180.53	12615.6	12504.9	17074.5	27373.3	6693.73	13548.3	13584.3	17915	29121.4	6982.39	14338.3	13901.1	7283.78	14619.2	14086.7	18884.3	31140.9	19227.5	31595.4	7226.24	15568.4	14140.7	14794.2	15123	19149.3	33343.5	19619.9
1308.55	15924.4	27057.9	6077.1	12414.2	12665.9	16108.4	29553.8	6226.68	13277.4	13447	16604	29973.7	6325.93	14461.2	13874.3	6407.39	14473.1	14190	17049.2	32093.2	17696.3	32782.1	6922.4	15461.5	14099.3	15876	15421.7	17273.6	33646.2	18345.4
1307.65	15957.5	26881.7	6117.52	12436.9	12478.4	17120.3	28599	6148.57	12541.4	13172.9	17905.6	29642	6182.25	12655.1	14141.9	6411.88	13462.7	14309.4	18421.4	32337	18723.5	30128.2	6507.52	13711.9	14626	14243.1	15323.8	18507.8	33304.4	20309.5
1306.74	16300.4	27048.4	6130.27	12412.6	12589.6	16753	29019.4	6137.46	12482.2	13414.6	18254.5	30359.2	6465.29	13130.9	14267.7	6749.72	13283	14213.7	19738	32949.6	19503.9	32402.3	6955.3	14415.3	14903.1	14423.1	14320	21164	34656.8	20964.5
1305.84	16220.1	27284.2	6231.49	12557	12883.2	17661.9	27620.4	6266.41	13388.2	13789.4	17777.5	27829.5	6651.79	14634.1	13890.7	6307.49	13611.4	14887.4	19512	27859	18411	28008.5	6831.48	14967.7	14973.7	13979.4	15033.5	19913.5	30442.2	19335.6
1304.94	16272.6	27392.7	6164.06	12571.4	12673.6	17544	28185.3	6308.62	13722.2	13923	17630.9	29934.3	6770.04	14198.9	14073.1	6548.03	14426.5	14339.6	18931.6	32643.6	18152.3	32557.3	7237.24	15507	15268.1	15031.9	15750.8	19709.6	35902.1	19711.1
1304.03	16150.9	27095	6066.25	12472.4	12699	17705.7	27599.4	6164.57	13087.7	13237	19112.7	29146.4	6773.67	13286.5	14139.5	6564.51	14382.7	13607.1	19292.8	29883.4	19799.5	31415	7294.54	14175.5	15049.5	15748	14206.5	20603.4	32296.6	21383.1
1303.13	16034.7	26825	6131.5	12638.8	12497.9	16368.3	29178.4	6661.71	12814.1	13694.5	17883.4	29242.7	7325.89	13598.1	14037.7	7009.23	13779.9	14564.9	19096.3	31186.9	18211.9	29785.2	7732.09	14245.7	14544.7	15046.7	15229.5	20610.4	32662.9	19595.6
1302.22	16183.9	27088.2	6147	12562	12564.7	16912.8	27636.6	6295.39	12731.3	12707.7	17544.7	27956.4	6471.42	13259.6	13477.3	6588.18	13683.3	12791.6	18759.8	28178	17715.4	29496.8	6817.81	13289.8	13810.6	14985.2	13057.9	18836.4	30064	18119.6
1301.32	16120.3	27392.9	6035.44	12645.4	12786.3	17048.3	28012.2	6157.06	13708.2	13959.5	18491.4	29632.3	6642.61	14504.7	14633.8	6583.02	14776.5	15117.1	19180.9	30122.9	19557.6	31980.8	7104.19	15375.4	15046.6	16034.8	15865.7	19386.8	30371.2	20118.9
1300.41	15915.8	27048.4	6084.09	12543.8	12629.4	16704	29449.4	6689.29	13259.6	13465.1	16860.1	30749.8	6834.42	13885.6	14729.8	6993.77	14550.5	13472.5	17061	32130.3	18072.5	32192.4	6967.39	14800.3	15416.4	15012.3	14185.1	18144.9	34669.8	18480
1299.51	15866.1	27217.6	6116.16	12773.5	12629.9	16606.2	29547.2	6401.61	13269.7	13803.4	16966.7	32063.8	6742.13	14562.4	14162.6	6791.41	13808.4	14311.6	17712.1	33255.3	17106.9	33745.3	7416.34	15212.3	14766.7	14291.6	15719.9	19225	35183	18463.3
1298.6	16225	27044.4	6104.04	12484.2	12550.4	16341.4	27681.9	6558.55	12710.8	12799.6	16467.7	28604.7	7119.28	12806	13399.5	6605.13	13955.5	13192.1	16597.7	31071.5	16664.5	29779	7501.46	13744.1	14649.2	13977.9	13492.5	16809.1	32142.5	17561.7
1297.69	16067.6	26915.4	6152.65	12443.3	12421.2	16981.6	27653.1	6469.33	12597.5	12438.2	18086.6	28229.1	6710.96	13187.6	13605	6959.77	13146.4	13029.1	18641.8	30575.9	19274.5	29664.8	7099.32	13588.1	14317.3	13601.8	13215.4	20074.2	33523.7	19735.6
1296.79	16059.2	26943.8	5894.91	12595.7	12460.5	17482	28531.3	6319.07	12919.4	12898.1	18552.2	31176.5	6373.2	13304	13413.1	6785.25	13421.7	12915.7	20196.1	33169.1	18957.1	31471.1	6635.42	14284.2	14090.9	14087.9	13921.5	20274.5	36125.2	20797.9
1295.88	15885.3	26906	5951.83	12405.8	12596.2	17247.8	27219.8	6499.98	12862.2	13333.7	18062.9	27869.3	6710.87	13286.2	14304.7	6716.82	13046.7	14475.2	18492.7	29219.6	18943.6	28022.1	7073.73	14430.6	14677.2	13639.9	15642.5	19645	29224.9	19129.7
1294.98	15719.8	26906.8	6119.07	12331.9	12384.4	16982.6	28506.7	6690.62	13417.5	12785	17295.2	29015.6	6813.55	13694.3	13713.6	7313.27	13792.7	13989.8	18653.8	31152.8	18704.3	31012	6991.96	13874	14360.5	13978.7	15175.2	19103.7	33976	20188.7
1294.07	15863.2	26907.6	6032.49	12233.2	12429.1	16143.3	27627.7	6279.89	13235.4	13198.4	17423.7	28200.9	6740.61	14512.8	13534.8	6598.54	14239.3	14429	18592.3	30450	17921.3	29296.7	7285.22	15498.6	14189.5	14889.1	14603.7	18961	31350.1	18538.3
1293.16	15623.3	26809.1	5987.3	12344.2	12217.3	16860.8	27682.4	6383.86	13243.7	13057.8	17451	30311.6	6505.16	13767.2	14096.6	6742.62	13760.9	13810.8	17983.2	32927	17897.9	33324	6873.56	13781.8	14406.7	14103.3	14237.7	18431.5	34274	19604.3
1292.26	15739.1	26845.8	5997.28	12240	12160	16334.5	28353.6	6226.37	13066.8	12367	16471	30564.9	6373.8	14121.6	12628.8	6772.95	14326.2	12618.1	16720.6	30649.2	16901.4	31431.8	6676.1	14260.5	12677.5	14420.3	12794.3	17837.6	32051.8	17254
1291.35	15628.8	26620.5	5971.42	11945.6	12168.9	16970.5	28511.8	6110.82	12741.7	12738.2	17422.1	29916.3	6645.32	13111.2	13854.6	6718.19	12932.1	13790.7	17622.2	32093.5	18496	31374.2	7139.97	14157.8	14457.1	13129.9	14140.2	18188.2	32465.3	20343.8
1290.44	15780.4	26957.6	5951.08	11949	12329.4	16013.3	28111.3	6422.91	12437.5	12843.6	16809.2	29527.1	6783.13	13671.8	14041.8	6708.57	12832.7	13896.5	17954.3	31192.8	16940.6	32035.4	7407.6	13859.9	14326.2	14037.7	14169.4	18091.5	32046.9	18177.8
1289.54	15557.2	26509.2	5919.72	12004.8	12236.3	16061.7	27887.9	6388.15	12426.4	13328.1	16091.1	29621	6390.33	12683.5	14429.1	6936.69	12460.4	14335	17650.8	30225.4	16684.1	30877.2	6822.91	13478.4	15444	12916.5	15161.2	18943.9	32031.9	17383.8
1288.63	15507.6	26628.5	5858.06	12123.9	12137.7	16365.4	26783.5	6401.27	12868	12396.6	16939	28762.9	6664.82	14071.6	12503.3	6496.82	13104.6	13215.4	17046.6	31189.8	17883.9	30248.1	6689.55	14849.6	13087.1	13230	13668.5	17704.2	32886.2	18529.4
1287.72	15482.8	26618.4	5901.11	11700.3	12165.9	16879.2	26768.1	5957.77	11910.7	13225.6	18274	27351.3	6157.46	12837.7	13272.7	6419.94	13026.2	14345.7	18505.1	27450.9	18934.3	29585.3	6754.87	12865.5	13994	13891.8	14512.9	19698.4	28913.2	19449.3
1286.81	15571	26404.3	5949.65	11932.4	11951.6	16063.6	28518.4	6149.87	12984.9	13086.3	16862.9	29571.2	6408.3	14083.6	13706	6424.15	13884.4	13922.2	16930.6	30252.7	17964.7	31095	6852.51	15336.7	14325.6	13987	15076	18274.1	31470.3	19071.2
1285.91	15521.5	26562.2	5777.86	11778.8	11916.5	16641.1	27998.7	6286.38	12483.3	12638.9	17206	30056.9	6605.28	13575.6	13313	6600.78	13126.4	12870.7	17824.5	30398	17943.9	31931.7	7207.67	14476.2	13515.7	13813	13774.1	18993.7	31976.4	19278
1285	15436.1	26549.3	5886.99	11848.3	12079.6	16594.3	27091.2	5988.93	11897.9	12344.5	17273.2	28693.3	6080.18	12640.8	13249.2	6531.88	12368.4	12831.1	18881.2	30217.8	18055.1	31371.3	6317.12	12824.8	14431.2	13413	13808.2	20123.7	30251	18433.8
1284.09	15609.6	26572.1	5883.2	11901.3	11992.2	16188.8	28400.8	6380.19	12910.4	12858.5	17625.5	29657.8	6434.31	13707	13702.5	6826.45	13484	13495.8	17939.2	30886.5	18839.5	31630.3	6965.4	14573.8	13979.7	14457.9	14573.8	18895.2	32103.5	19690.6
1283.18	15623.4	26512.4	5895.93	11937.7	11979	16461.8	27184.2	6221.42	12910.4	12374	17709.7	27319.5	6448.97	13306.8	13481.9	6330.42	13307.4	12567.7	19068.9	27525.7	19263.3	29404	6493.02	13854.7	13741.3	13796.2	13357.6	19877.2	28060	19800
1282.27	15447.3	26507.8	5795.82	11919.1	12023.7	16406.8	28682.3	6039.83	12220.4	12386.8	17190.9	29601.4	6565.87	12894	12641.3	6271.68	12908.4	12433.4	18824.2	30012.6	17910.7	31216.9	6772.09	13932.3	13319.6	13451.4	13014.1	20593.7	30386.1	18143.9
1281.36	15573.9	26660	5745.28	11600.6	12010.6	16341.6	28856.8	6304.57	11763.1	12142	17324.1	30719.4	6794.36	11787.7	13086.8	6479.43	12388.2	12707.7	17817.9	30842.4	17645.4	31352.8	6996.01	12869.1	13318.9	13535.5	12780.9	18486.1	32249.4	18907.7
1280.46	15648.2	26366.4	5804.79	11730.6	11898.4	15936	28100.8	6160.46	12259.4	12993.3	17232.9	30888.5	6430.39	13097	13946.9	6422.8	12722.2	13204.6	17870.2	33364.3	17650.1	31361.3	7037.14	14010.4	14238.5	13852.5	13608.4	19122	35439.8	17742.9
1279.55	15433.6	26392	5869.79	11761.6	11987.1	15482.6	28853.1	6326.93	12001.6	12952.7	15861.2	31558	6544.93	12228.4	13641	6748.93	12201	14205.1	16700.4	32753.9	17191.3	33868.3	6569.04	12550.7	13720.6	12996.7	14387.5	16759.1	32873.8	18169.4
1278.64	15425.4	26544.2	5811	11787	11888.8	16858	27856.4	6242.08	12427.3	12366.9	17814.9	27875.2	6673.57	13178.1	13147.2	6534.43	13394.3	13224	19355.4	30110.9	18159.9	30155.9	7006.33	14242.9	13469.2	14289.3	13431.6	19826.3	31328.2	19468.8
1277.73	15365	26608.2	5730.24	11815.2	11655.7	16633.6	26907.3	5962.41	12641	12735.6	17300.5	29103.7	6523.13	13831.9	12997.2	6032.09	12992	13896.4	18109.8	29567.5	17780.5	29237.2	6982.46	14964.6	13028.3	13075.9	14541.4	19445	31443.5	19216
1276.82	15255.1	26515.6	5778.72	11851.6	12024.8	15889.9	28227.1	6191.57	12629.3	13132.1	16927.9	28827.5	6695.74	13790.3	13869.3	6562.67	12819.1	14136.5	16929.9	30607.1	18095.9	30099.4	6752.75	14757.8	14861.7	14010.6	14921.1	17504.8	33315.8	19196.8
1275.91	15590.5	26640.1	5791.45	11868.8	11943	16517	27868	5831.81	12033.9	12519.7	17554.4	28445.9	6235.97	12529.2	12974.7	6099.54	12322.2	13508.7	17802	28763.8	18122.7	30382.3	6369.06	12676.5	13952.6	13181	14576	19137.3	30069	19030.8
1275	15340.4	26591.5	5798.68	11699	11965.6	15418.2	27518.1	6056.73	11709	12041	16516.7	27801.7	6119.92	12103	13218.2	6635.69	12759.6	13172.1	16990	28859.8	17719	29078.4	6312.56	13120.7	13828.9	13934.4	13895.1	17931.3	30777.2	17914
1274.09	15461.3	26342.2	5605.32	11804.1	12153.1	16325.4	28024.4	5623.66	12040.4	12868.4	16506.2	30144.1	5750.8	12747.7	14112	5753.21	12991.9	13672.1	17323.2	30667.9	16615.2	32413.2	6272.02	13010.6	14675.3	14161.8	13766.9	18358.4	33006.7	17672.8
1273.18	15554.8	26395.3	5686.75	11656.5	11944.9	16365.7	28248.2	5809.01	11884.5	12196.9	17794.8	30187.3	5846.86	11950.6	12563.2	6034.46	12177.1	12699.5	18267.3	32799.9	18284.5	33181.7	6304.23	12715.1	13612.7	12395.7	13589.1	18645.5	35001.8	19963.2
1272.27	15195	26442.9	5735.19	11865.9	11956.6	16163.3	28756.6	6087.83	12220	13148.8	16497.8	30630.4	6602.07	12839.5	14209.6	6424.41	12680.1	14178.8	17091	31995.8	17648.5	30968	6948.39	13269.8	14659.2	12888.9	15210.9	17577.7	32041.3	18617.8
1271.36	15417.5	26388.8	5838.54	11935.2	12135.7	15519.6	28878.8	5901.59	12020.7	12871.2	16215.6	30251	6481.45	13181.1	13202.9	6111.86	12788.8	13188.2	17018.8	30832.3	17395.4	33039.7	6601.9	13877.4	13360.5	13372	13384	17747.1	32979.3	18760.8
1270.45	15466.9	26776.8	5694.73	11834.3	11853.5	15964.8	27287.3	6109.01	12315.7	12456.8	17396.7	27739.7	6247.36	12998.1	13182.5	6701.32	13415.3	13315.4	17879.8	29142.5	18985.2	28411	6697.97	13926.3	13341.6	14552	14121.7	19398.3	30068.1	20769.1
1269.54	15546.6	26629.3	5745.89	11925.5	11950.3	16111.7	28193.5	6128.54	12655.5	12865.4	16474.4	30924.6	6516.83	13514.9	13650.5	6676.71	13141.6	13028.8	16510.6	32809.3	16537.9	31645.1	6698.84	14851.6	14680.3	14113.5	13136.5	16661	33589.3	16982.7
1268.63	15563.1	26643.9	5879.38	11893.3	12143	16243.6	27517.8	5975.48	12467.3	13240.4	17353.5	28135.6	6364.58	13107.9	13356.6	6340.39	12679.8	13954.5	18784.8	30013	19083.1	29636.9	6595.06	13127.5	14098.6	13707.5	15103.6	18934.9	31696.8	20743.1
1267.72	15351.8	26768.2	5837.18	11619.5	11814.3	16546.4	28159	6331.72	12453.8	12263.3	17530.4	29101	6633.8	13098.6	13458.1	6953.63	13382.3	13167.6	18665.6	31774.1	18253.5	29663.7	6724.23	14096.9	13738.3	14036.9	13908.6	19095.9	32430.6	19315
1266.81	15637.2	26725	5896.52	11900.1	11817.7	16466.1	27660.8	6273.51	12051.7	12474.3	17149.3	29626.4	6482.07	12841.7	12930.5	6712.69	12765.4	12810	17764.9	32455	18849.2	30959.1	7081.01	14103.1	13916.4	13699.2	13288.7	18822.1	34471.2	19043.1
1265.89	15596	26687.4	5777.52	11774.5	12051.6	17077.2	27064	6003.65	12081.9	12796	18562.6	29757.5	6477.37	12525	12822.2	6078.05	12593.9	13695.1	18754.5	31919.7	18703.1	31841.1	6839.7	13455.2	13002.3	13405.8	14238.5	18954.2	34228.2	19366.7
1264.98	15288.8	26474.3	5664.05	11852	12192.1	16548.2	28922.8	6222.59	12356.7	12231.8	17956.6	30233.1	6735.66	12791.4	12755.7	6600.79	12924.3	13172.3	19668	30957	18129.6	32934.1	7231.82	13398.3	13715.6	13442.3	14151.4	20224.5	32824.6	18516.1
1264.07	15522	26809.7	5701.44	11748.4	11764.9	16029	26961.3	6136.37	12783.8	11983.8	16694.2	27332.3	6158.06	13751.3	11989.5	6595.58	14046.7	12078	17885.3	27388.8	17477.7	28907	6428.54	14074.8	12795.6	14972.4	12824	18013	27613	17873.5
1263.16	15206.7	26552.7	5683.99	11856	12034.3	15282.1	26710.1	5776.88	12399.8	12076	15575.8	26831.9	6182.62	13372.2	12475	6285.67	13490.3	12544	16992	27728.2	16565.3	27305.7	6549.26	13609.1	13325.2	14130.5	12901.6	17646.2	30383.1	18141.4
1262.25	15308.2	26315	5729.59	11851.2	12032.1	16327.4	27021.2	6086.12	12676.1	12214	17400	27281.3	6372.15	13866.6	12451.3	6215.22	13471.6	12531.6	17731.7	27431.4	17974.6	28239.3	6445.76	14556	13622	13840.6	12694.7	19242.9	29074.2	19479.6
1261.34	15228.7	26644.8	5679.25	11629.9	11813.5	15263.2	27741.3	5683.6	12508	12749	15402.2	28275.4	5786.74	12741	13820.9	5938.87	13133.7	12785.3	16287	28474	16890.5	29717.8	5876.89	13816.4	14715.7	14114.2	12917	17262.8	30235.2	17885.6
1260.42	15264.4	26541.4	5730.32	11819.6	11934.7	16449.3	28043.9	6118.21	12532.6	12624.2	17042.1	28748.6	6396.28	13191.7	13573.2	6588.51	12625.2	13065.6	17522.2	31444.5	18112.6	31243.1	6524.21	14180.4	13845.9	12884.7	13979.1	18223.4	32267.5	18809.8
1259.51	15461.7	26224.4	5701.91	11927.2	12001.1	15696.4	28797.7	6003.44	12364	12552.1	16847.2	31528.8	6322.03	13030.7	13681.1	6514.29	13254.8	13468.7	17036	33460	17329.2	31599.5	6746.79	13697	13871	14301	13838.1	18712.4	34754.3	17772
1258.6	15617.9	26343.1	5739.26	11925.1	11867.5	16991.6	28088.5	6107.01	12629.1	12171.1	18552.4	30066.5	6529.32	13598.4	12405.3	6549.3	12685.4	12919.7	19768.4	30826.3	19473.3	31744.3	6749.23	14166.8	13450.8	13432.6	13262	21695	30937.1	19939
1257.69	15333	26209.7	5798.51	11723	11975	16074.8	26697.5	5918.81	12834.7	12717.7	17372.5	27183.4	6471.25	13701.9	13531.3	6506.86	12883	13632.8	18729.8	29825.2	18937.3	28699.7	6541.32	15033.2	14150.6	13280.5	14468.5	19298.8	32501.5	20718.9
1256.77	15234.5	26298.2	5786.54	11803.1	11951	15856	27327.4	6198.16	12532.2	12548.2	17016.1	28880	6524.15	12980.1	13205.4	6742.77	13435.5	12632.3	17953.7	28932.3	17712.4	30615.5	6837.82	13387.2	14471.4	13941.9	12781.8	19434.8	31793.1	18152.5
1255.86	15357.8	26436	5654.09	11697	11866.7	16136.9	27593.3	6152.39	12624.7	12413.5	16988.6	29414.4	6411.86	13790.7	13359	6490.1	12671.5	12866.4	18685.9	31687.2	18501.7	32219.9	6926.42	14892.1	14094	12934	13394.1	18708.8	34242.7	18819.6
1254.95	15415.3	26450.5	5855.68	11752.4	12165.8	15731.5	26745.3	6333.51	12275.6	12562.9	16874.6	27375.3	6772.35	12958.2	13213.2	6905.4	12971.6	13516.4	18289.3	28404.2	17763.1	29584.3	7132.31	13347.1	14243.5	14238.6	14517.4	19556.8	30566.4	19093.3
1254.03	15593.2	26032.5	5693.16	11698.3	12026.8	16869.8	26395.5	6201.86	12020.3	12979.7	18443.4	26650.9	6725.13	12909.4	12998.3	6275.25	12294.5	13226.6	18788.7	29276.5	19522.8	26840.3	6848.54	13165.9	13473.2	12395.1	13745.6	19311	31243.3	20709.8
1253.12	15593.2	26400.1	5705.84	11783.9	11937.1	15709.6	28890.3	6083.77	12134.5	12314.8	17055.8	30806.4	6439.75	12727.5	13005.8	6572.32	13059.9	12318.7	18476.4	31371.1	17153.4	31732.4	6739.78	13773	13124.3	13131	12797.6	20200.7	33856.7	17273.3
1252.21	15136.3	26362.6	5951.09	11691.5	11978.8	15967.2	28105.1	6377.27	12155	12972.5	16771.6	29565.8	6717.61	12715.1	12985.9	6753.28	12319	13317	17040.1	30977.1	17800.4	31657.7	6779.51	13491.2	13984.8	13278.3	13913.8	17798.9	31451.8	18703.4
1251.29	15363.4	26284.1	5613.55	11779.7	12113.5	15893.6	27251.6	5991.09	12748.2	12996.4	17203.6	27261.5	6388.84	12856.8	13387.7	6248.26	13487	13395.5	17366.3	29568.9	18031.2	28779.2	6880.15	13111.3	14533.5	14701.7	13929.6	18005.3	29863.5	18713.7
1250.38	15089.9	26000.5	5856	11654.6	11889.8	15695.5	28424	6166.7	12503.1	12592.3	16701.3	30681.1	6206.65	13703.3	13662.3	6453.53	13657.8	12831.5	17303.3	31389.2	16767.5	33531.2	6640.58	14238.3	14170.4	14874.5	13558.5	17831.1	32391.6	17342.1
1249.46	15429.1	26242.1	5781.13	11666.2	11999.8	16116.2	28384.5	6249.24	12182.6	12341.7	16836.7	29003.9	6802.54	12191.2	12728.5	6751.8	12531.6	13411.8	16846.3	30511	17388	30497.8	7152.79	13161.2	13035	13551.1	13897.4	17328.9	32783.5	18613.8
1248.55	15459.2	26248.4	5736.36	11795.4	11904.7	16773.3	27903.2	6015.96	11954	12834.1	18274.6	28601.2	6016.5	12932.4	13883.1	6500.6	12078.4	13842.8	18320.7	29858.6	19727.1	31132.8	6191.01	13054.5	13952	12916.6	14155.2	19220.3	32620.3	21591.6
1247.63	15393.6	26090.7	5620.54	11752.3	11973.7	16851.9	27439.5	6111.44	12102.4	12821.3	17299.1	27940.6	6654.67	12794.2	13828.7	6394.7	12552.7	13694.9	18491.3	29730.2	17345.8	28397.5	7107.21	12974.2	15132.2	13482.1	14697.3	19375.2	32308.9	17762
1246.72	15462	25913.9	5917.47	11446.8	11977.1	15924.4	28214.2	6284.8	11664.8	12974.1	16628.3	30149	6469.32	12191.1	13192.2	6742.33	12674.8	14144.9	18025	32908.9	17371.2	31459.8	6741.41	12675.6	13496.8	13731	14608.5	19120.6	33239.6	19012.3
1245.81	15347.2	26188.1	5774.33	11597.8	11884.8	15601.5	26739.2	5905.92	12178.9	12692.4	16061.3	27693.7	6374.08	13327.5	13461.9	6075.36	12717.1	13812.7	17280.2	29061.2	16277	30187.9	6968.34	14057.9	14619	13630.4	14745.9	18945.8	31161.4	17701
1244.89	15377.3	26262.7	5792.43	11699.6	11789.8	16586.3	28016.2	5923.06	11871.5	12375.9	17964.8	30617	6095.67	12693.7	12794.6	6469.52	13032.6	12979.9	18074	32685.5	18610.5	31243.5	6367.14	12816.1	12872.6	13368.5	13984.6	18521.6	35485.1	19665.6
1243.98	15350	26167.9	5690.34	11673	11924.3	15944	26622.1	6135.58	11810.8	11951.8	16586.3	27146.7	6673.11	12707.2	13106.4	6212.9	12918.4	12020	16638.4	27960.2	17782.6	28247.9	6759.42	13427.8	13885.1	14014.1	12126.9	17483.9	29981	19486.4
1243.06	15453.8	25977.6	5604.67	11802	11862.1	15806.5	28424.6	5682.02	12905.4	11893.3	17283.6	29798.6	5711	13193	12862.3	6120.38	13505.9	12220.8	18889.2	30793.3	18991.8	30966.1	5889.71	13480.6	13513.1	13563.8	12574.4	20712.5	31979.1	19256.7
1242.14	15087.9	26218.8	5740.22	11745.3	11835.4	15749.6	27304.7	5976.57	12374.6	13005.6	16337.9	28838.8	6432.07	12954	13267.9	6490.73	12993.2	13646.9	16672.4	29906.3	17936.5	31261.4	6532.85	13357	13926.3	13135.6	14004	17413.2	29980.8	18926.9
1241.23	15227.2	26252.4	5638.19	11549.4	11680.5	15362	26590	6176.12	12271.5	12275.4	16224.7	27634.5	6471.05	13469.2	12314.1	6257.35	12531.9	13127.9	17698.5	30235.2	17617.8	28041.6	6655.53	13509.3	12610.7	13312.1	14429.9	18400	31350.1	18461.8
1240.31	15199.9	26455.2	5661.76	11498.2	11670.2	16507.7	26789.5	6112.11	12479.1	12463.5	17559.6	28558.1	6200.5	13279.1	13344.4	6397.38	12970.1	12535.8	17992	28730.4	18215.7	30764.2	6232.53	13388.2	13710	13741	13370.4	19021.6	29739.6	19637.4
1239.4	15380.1	26068.4	5698.98	11720	11971.1	16280.1	28534.3	6082.22	12095.8	12279.9	17243.8	28926.1	6602.32	12593.6	12896.1	6617.48	13148	12875.9	17719.5	29184.7	18168.2	30525.4	7144.57	12811.5	12957.7	13397.3	13701.8	17770.2	31326.6	19172.5
1238.48	15074.5	26088.4	5635.21	11630.6	11884.4	15182.2	28405.3	6150.6	11838.3	12567.5	16671.5	29979.1	6299.41	11927	13165.2	6414.36	11916.7	13614.6	17694.3	32557.8	18063.9	31791.5	6744.38	12762.8	14170.4	12750.6	14423.3	17738.2	35641.4	18490.4
1237.56	15159.2	26277.5	5593.29	11838.7	11718.6	16373.6	27517.1	5596.14	12811.3	12809.3	16938.3	27704.9	6118.42	13606.8	13929.1	5671.15	12940.3	13954.9	18417.2	28866.5	17506.8	29033	6177.16	14608.6	14953.1	13813.6	14661.9	18724.6	31535.3	18525.8
1236.65	15025.6	26264.7	5712.33	11514.7	11978.4	15121.6	28345.1	5800.51	12583.6	12922.8	16556.2	30675.7	6150.61	12722	13016.9	6194.03	12928.5	14045.8	17945.1	33316.3	17803.4	32665	6515.59	13142.7	13468.8	12947.8	15222.9	19597.8	35890.3	17949.2
1235.73	15172.9	26189.2	5703.14	11267.2	11662.7	15334.4	27275.7	5868.5	12244.1	12748.9	16683.7	28549.4	6176.92	12801.2	12881.7	6434.57	13190.1	13394.4	16899.6	30957	17050	29561.3	6549.2	13967	12895	13379.2	13427.9	17592	33499.2	17386.7
1234.81	15134.8	26078.2	5718.5	11502.4	11840.6	16595.5	28408.1	5718.81	12602.1	12436	18073.8	29621.4	6217	12888.2	12938.9	5951.01	13761	13611.1	19169.4	32257.5	19095.3	31609.8	6344.9	13435.8	13616.4	14100.8	14914.7	19738.7	34495.1	20393.1
1233.9	15192.1	25795.5	5562.08	11372.3	11568.6	16563.5	26476.2	6061.78	11921.5	12421.4	17499.5	27926.5	6581.11	12839.6	13626.8	6316.7	12850.7	12483.4	18041.7	29718.4	18327.2	30514.7	6586.29	13219.4	14237.1	13027	13146.2	19529.8	32252.1	19797.7
1232.98	15260.3	26020	5601.99	11536.6	11642.9	15373.4	27895.7	6015.89	12616.9	11782.1	16252	28709.1	6203.86	13120.3	11991.2	6588.73	13657.8	12769.6	16774.2	30574.4	16770.2	29370.9	6567.31	14272.7	12430.6	14685.6	13951.2	17668	31676.8	17961.7
1232.06	15036.9	26026.3	5641.89	11327.4	11657.2	15847.1	27700.5	5924.41	11348.9	11829.2	16635.3	30016.4	6174.89	11403.3	11850.6	6463.61	11484.6	12263.8	16758.7	32091.1	17571.1	31863.3	6590.12	11566	12924.1	11543.1	12595.5	18266.3	34574.2	19046
1231.15	15391.2	25558.4	5567.31	11249.1	11434.4	16572.7	27825.8	6118.69	11461.3	11800.9	16578.6	28688.7	6436.11	12258.6	12625	6724.22	11720.8	12714.9	17925	29274.9	17469	31537.4	7025.7	12753.1	12997.4	12324	13412.9	18854.1	30206.5	18178.9
1230.23	15178.7	25668.3	5639.9	11309.8	11467.8	16294.9	28151.6	6107.79	11949.3	12150.9	16829.4	28214.8	6225.66	12396.6	12686.8	6381.04	13078	12472.2	17615.4	28790.5	17805.4	29741.2	6695.18	13410.4	13127.3	14034.2	13313.8	17687.7	29610.3	18636.2
1229.31	14898.1	26026.1	5361.04	11487.6	11389.5	14953.5	26361.3	5519.03	12484.8	11674.9	15983.9	28135.2	5947.39	12955.8	12661.1	5872.14	12759.1	12294.7	16903.7	29200.5	17509.1	28674.9	6045.06	13723.3	13728	13372.6	12806.2	17634.9	29897.9	18656.8
1228.39	15058.9	25879.9	5599.78	11281.3	11561.8	16545.5	28338	5955.77	12055	11910.5	17684.7	29221.5	6384.84	12766.8	12728.5	6002.86	12288.9	12654.5	19004.7	31464.8	17879.9	32011.9	6959.52	13258.4	13866.9	13284.7	13272.1	20325.2	33116.2	19565.2
1227.48	14784	25396.1	5525.27	11197.6	11529.8	15480.1	26627.2	5538.05	11730.1	12295.3	16198.2	27063.4	6014.99	12783	12740.2	5741.7	12590.3	12713.8	17728.3	27348.2	16672.7	29008.5	6100.59	12949.4	12920.9	13236.3	13050.3	18246.9	29527.6	17425
1226.56	14906.6	25968.8	5497.06	11217.4	11552.3	15236.6	25996.1	5946.22	11637.5	11789.8	15573.5	27226.2	6502.78	12635	12625.5	5958.01	11991.2	11880.7	15927.2	27489.9	16667.5	29647.9	6612.81	12698.5	12809.9	12052.1	11974.2	16756.3	28976.1	18008.2
1225.64	14762.4	25596.7	5577.76	11348.8	11370.6	16073.2	27303.9	6043.87	12281.7	12163.1	16577.8	29547	6258.11	12352.3	13046.2	6425.08	12882.9	12536.2	17925.1	30932.7	16758.5	29889.7	6460.17	12371.7	13536.5	13352.4	13523.9	18457.2	31588.6	17135.4
1224.72	14708.1	25752.8	5506.01	11131.8	11390.3	15643	26052.8	5851.75	11227.4	11926.3	15686.6	28040	5891.43	11298.7	12793.1	6128.13	11924	12011.8	16737.4	28183.1	15892.9	29206.6	6438.73	11586.4	12869.3	12806.7	12568.7	17944.2	29228.2	16665.4
1223.8	15034.8	25495.2	5499.6	11295.8	11497.2	15664.1	27714.2	5763.65	11811	11844.6	16566.1	30466.9	5781.09	11946.3	12090.9	5854.56	12158.8	12368.7	17564.9	33220.6	17686.3	30493.9	6124.26	12082.1	12920.4	12437.6	12945.4	18383.1	34825.3	19052.7
1222.88	14942.3	26053.9	5479.58	11239.4	11302	15270.2	27096.9	5965.43	12274.6	12099.2	15409.8	27190	6186.32	12380.5	12426.5	6038.46	12801.1	12793.8	16680.3	28276.9	16887.4	28581.8	6725.77	12465.8	12469.3	13900.2	13570.4	18122.1	29461.8	18488.1
1221.96	14569.7	25573.2	5459.58	11147.7	11327.2	15216.7	26431	5918.73	11815.6	12398.1	15451.3	27187.6	6180.84	12896.6	12875.2	6230.09	12374.6	13374.7	16671.2	28581.5	15676.6	29385.4	6740.52	13203.4	14132.8	13134.9	14039.1	16709.1	29596.9	16115.6
1221.04	14885.4	25345.7	5515.73	11077.7	11376.9	15739.7	25476	5682.64	12050.9	12335.1	16202	26171.7	6042.54	12133	12577	6045.37	13153.1	13323.3	17419	28175.4	17758.7	27782.8	6219.64	12395.9	12661.4	13330.9	13824.9	18636.2	29654.8	19101.6
1220.12	14624.4	25743.7	5528.35	10931.6	11334.1	15334.5	27258.4	5532.68	11978.2	12447.1	16138.8	29954.3	5539.49	12505.4	13458.9	5596.51	12824.4	13482.4	16842.6	31360.6	17055	30123.1	5997.87	13168	13879.9	14088.2	14034.6	17721.9	32304.9	17534
1219.21	14785	25638.5	5475.72	10820.9	11158.1	15874.4	27086.8	5886.89	11726.9	11576.1	17384.3	28624.1	6384.51	12102.7	12273.3	6451.79	12851	12189.5	17420.2	30557.8	17433.3	28627.5	6981.59	13245.1	12942.5	14135.5	13374.3	18265.5	31524.5	18755.7
1218.29	14850.3	25587.8	5398.64	11031.1	11441.5	16099.5	27009.5	5819.61	11119.4	12443	16632.6	27707.9	6258.64	11385.5	12876.8	5943	12156.2	13144	17914.5	28364.4	17179.5	28201.8	6482.87	11588.2	14137.4	12793.9	13700.8	18916.2	30378.6	18284.9
1217.37	14850.4	25550.7	5509.12	10833.4	11194.9	15741.4	26468.6	5640.96	10924	11445.4	16951.4	28099.1	5949.34	11292	11692.4	6023.46	11399	12497.9	17279.4	28959.4	17799	30452.6	6038.2	11425.3	12742.3	12297.2	12730.6	18453.5	29596.6	19038.3
1216.45	14720.1	25481	5432.06	11046.2	11187.5	14969.4	26817.5	5437.77	11231.4	12090.7	15370.7	28298.5	5921.48	11938.4	12274.5	5687.25	11503.7	12356.2	15557.6	28781.1	16814.3	28699	5954.45	12949.9	12650	12064.4	12442.4	16417.3	31304.5	18386.7
1215.53	14600.7	25590.6	5458.27	11090.4	11204.5	15747.4	26437.4	5965.71	12084.9	11255.7	16160.5	26702.7	6399.3	13038.5	12198.5	6347.05	13214.6	11874.7	16248.2	28356.5	16443.9	28620.6	7009.49	14132.4	12222.9	13837	12883	16784	29399.3	16810.3
1214.61	14704	25504.6	5527.93	10892.9	11237.9	14872.5	25769.6	5981.38	11639.7	11568.9	15938.5	27362.4	6367.31	11659.1	12487.8	6001.07	12693.6	12571.1	16417.8	28766.7	17169.1	28715.3	6529.37	12333.1	12792.9	12831.6	13257.1	17746.1	30185.1	18879.1
1213.68	14989.3	25147	5440.05	11130	11295.6	15708.3	26807.3	5926.97	11336.8	11894	16239.5	27760.1	5959.05	12261.2	12082.6	6503.85	11563.3	12692.5	17275.3	30362.2	17681.8	28610.3	6150.36	12602.2	12741.6	12482.5	13644.1	18346.1	30698.2	19350.3
1212.76	14888.9	25658.5	5496.11	11092.7	11453.9	16192.1	26701.7	5644.98	11539.4	12515.4	16252.6	28512.5	5817.92	11831.3	13038.6	6183.44	12612	13111.1	16488.5	29265.8	17497.7	28925.8	6181.83	12174.8	13404.5	13209.3	13483.1	16649.9	30276.1	17845.6
1211.84	14889	25773.4	5628.18	11123.3	11207.5	15138.5	27853.2	6038.21	12155.6	11518.4	15935.9	29680.8	6339.5	12309	11584.5	6260.94	13201.7	12421.7	17035.7	30018.4	17266.8	31503.7	6536.74	12488.5	12109.8	14348.1	13574.2	18439.1	31989.7	18014.7
1210.92	14783.2	25823.2	5477.88	11067.1	11172.9	15339	25899	5660.75	11139.5	11553.5	15445	27876.5	5981.67	11142.6	12525.9	5875.5	12164	12304.6	15985.7	29123.7	16635.8	30207.9	6216.94	11444.5	13297.5	13246.7	13173	16136.6	31809.2	16995.5
1210	14848.5	25799.6	5525.77	11057	11293.1	15138.6	26601.5	5561.34	11796.6	11936.3	15745.9	28376.6	6020.2	12079	12815.2	5937.75	12883.4	13105	15894.4	29729.9	16085.9	29177.9	6089.3	12982.8	13509	13126.2	13966.6	16986.6	32305.9	17509.3
1209.08	14544.6	25214.3	5617.06	11228.7	11245	15875.7	27661	5795.48	11988.5	11361	16468	29204.8	5807.07	12097.9	11843	5999.77	12303.4	12426.7	17839.1	31806.4	18079.6	31770.2	5974.49	12429.3	12935.7	12490	13571.7	19156.8	33215.9	19014.6
1208.16	14696.7	25828.5	5610.64	11161.6	11359.6	15888.2	26237.5	6106.21	11224.6	12042.3	16343.2	27341.9	6702.03	12142.7	12883.6	6426.54	11665.1	12691.7	17761.3	29129.7	17030.2	29486.6	6794.28	12225.9	13822.5	12319.5	13589.8	18841.5	31292.1	17194.8
1207.24	14854.2	25653	5604.22	11015.8	11200.3	16289.1	26363	5794.15	11958.1	11394.9	17221.2	28539.5	5894.61	12078.7	11824.6	5963.99	12492.9	12393.9	18777	29789.6	18062.3	28835.1	6140.02	13221.8	11917.8	12794	13329	18865.7	31924.3	18106.4
1206.32	14810.9	25765.1	5559.84	10862	11445.1	15977.6	27151.7	5638.2	11358.3	11744.3	17395.5	27800.7	5703.01	11940.9	12493	6056.07	12341	11874.3	17531.7	29319.3	19051.7	28399.6	6163.15	12404.7	12686.8	12396.9	12675	17741.3	31338.1	20892.2
1205.39	14531.7	25825.6	5591.4	10957.7	11269.6	15473.3	26976.2	6127.07	11851.9	11922.5	16618.8	28628	6198.28	12345.8	12937.6	6393.39	12831.7	12114.1	16819.4	28788.3	18223.5	29560.3	6703.95	13388.8	13326.6	14044.5	12644.3	17809.2	29881.4	18225.4
1204.47	14830	26029.8	5514.5	10793.1	11275.7	16292.9	28209.1	5767.77	11017.7	11277.5	17271.8	29614.7	6171.74	11248.3	11477.1	6276.1	12091.8	11374.3	18127	31844.9	17580.8	30295	6547.78	12348.9	12282.7	13197.6	11841.9	18637.6	34993.1	18914
1203.55	14645.8	25724.3	5516.23	11062.3	11140.9	14702.2	27312.5	5666.2	11407.5	11174.4	15369.3	28240.1	6156.5	12483.2	11886.9	6042.79	12466.3	11348.3	16226.2	29046.4	15369.5	29962.4	6559.36	13620.4	11967.8	13499.3	11545.4	16639.7	29188.1	16276.5
1202.63	14458.9	25535.5	5517.97	11000.7	11101	15053.3	26400.9	5685.4	11940.9	11750.4	15266.8	27292	6048.03	12099.4	12315.9	5841.37	11972.7	12699	16290.1	29561.7	15796.8	28959.1	6497.39	13260.6	12381.4	12625.4	13529.5	16854.6	29803	16710.9
1201.7	14637.9	25536.4	5552.22	10885	11416.1	15757.6	26571.9	6023.55	10996.7	12426.4	15768	28457.6	6556.1	11897.6	13212	6050.96	11321.3	13596.8	16775.4	30528.2	16128.4	28813.7	7207.36	12449	13334.2	12149.4	14293.7	18046.1	33066.2	17005
1200.78	14659.7	25537.3	5434.74	10937.2	11013.1	14807.5	26473.5	5707.42	11963	11778.8	15373.7	28664.6	6135.58	13077.6	11888	5879.82	12925.6	12371.6	15864.1	29475	16858.7	31417.4	6669.35	13152.8	13005.1	14047.9	12596	16501	31418	17832.2
1199.86	14435	25673.7	5647.77	10840.5	11273.9	14769.3	26571.7	6179.83	11637.8	12209.2	15399.1	27561.7	6513.26	11843.4	13333.7	6293.78	12227.2	12651.7	15405.3	27967.7	15785.1	28487.7	6613.79	12547.4	13960.9	12363.7	13529.4	16655.5	28919.4	16411.6
1198.93	14662.7	25485	5565.53	10716.7	11028.1	15018.3	26231.8	5673.78	11485.6	11294.3	15877.7	27041.4	6080.5	11862.2	11774.6	5735.28	12440.4	11456.8	16463	27252.9	16616.4	27209.6	6675.92	12832.4	12298.4	12666.6	11847.4	17703.3	29648.5	18140.4
1198.01	14508.4	25366.7	5253.15	10714.8	11047.9	15337.2	26679	5659.44	11223.1	11342.3	16583.4	27460.9	6132.62	11392.1	11888.4	5684.31	12080.7	11622.3	18181.3	29257	17253	29576.2	6593.55	11498.5	11920.5	12591.7	11905	19351.3	29637.3	18586.2
1197.09	14532.9	25413.7	5411.95	10658.8	11167.7	15633.4	27762.3	5831	11704.2	11834	15831.3	29593.4	6346.7	12849	12377.3	6234.2	12569.9	12159.5	17189.1	31157.7	17163.6	30830.7	6554.86	13517.7	13248.5	12920.7	12882.8	17247.7	32890.2	18258.9
1196.16	14644.1	25498.5	5440.77	10673.1	10900.5	15439.3	27003.2	5942.08	10818.5	11237.7	16589.8	29330.2	6210.99	10915.2	11442.9	6280.8	11221	12095.6	16701.3	29833.5	16930.1	30027.3	6317.72	11944	12028.4	11416.8	12311.8	16976	29977.3	17394.6
1195.24	14408.7	25550.9	5523.7	10535.9	11098.8	14902.8	27924.1	5554.8	11263.4	11307.7	16020.8	29527.7	5837.57	11961.1	11523.1	6098.06	11893.6	11451.9	17121.2	32126.2	16866	31185.5	6307.03	12634.9	11613.5	12141.9	11838.3	18370.6	32456.7	18016
1194.32	14714.6	25392.1	5430.73	10563.8	10937.2	14977.3	26108.8	5440.78	11100.2	11350.3	15343.2	28192.7	5764.04	12027.1	12336.6	5868.97	11525.7	11934.7	16512	29304.8	15709.2	30814.3	6137.19	12558.8	12681.9	12097.9	12406.3	17775.3	30204.6	16418.4
1193.39	14598.4	25368.7	5529.87	10764.8	11138.2	15333.2	27621.3	5966.07	11172.2	12234.5	16840.9	29482.2	6555.22	11857.6	13178.2	6559.93	11385.2	12830	17331	30937.1	17084.5	29487	6659.56	12730.2	13178.4	11849.8	13076.7	17509.9	32550.6	18121.6
1192.47	14552.6	25234.4	5423.4	10595.2	10922.5	14790.7	25865.3	5528.56	11563.3	11271.6	14791.8	26174.5	5889.63	12332.1	11511.1	5727.01	11794.4	11385.6	16192.1	28488.4	15001.8	28088.6	6150.36	13443	11520.4	12462.6	11899.5	17154.6	29068.3	16193.9
1191.54	14371.5	25448.9	5295.33	10679.9	10912.5	14446.2	26011.8	5333.83	10842.7	11261.8	15335.6	28090.1	5414.64	11068.8	12047.9	5702.36	10843.7	11718.5	15758.9	28897.5	15520.2	28544.5	5903.23	12113.9	12916.9	11504.3	12552.8	16133.1	31657.6	15755.8
1190.62	14466.3	25047	5410.66	10526.6	11029.5	15399	26060.8	5812.38	10801.7	11040.4	16034.8	27738.4	6177.36	10948.5	11500.7	6205.49	11627.5	11875.5	16741.6	27846.4	16474.6	28088.3	6711.62	11804.1	11864.1	12121.2	12836.4	17792.3	29971.5	17184.5
1189.69	14585.4	25415.6	5363.75	10473.4	10943.8	15546.6	25952.8	5487.34	10478.8	11378	15594.6	26549.8	5562.2	10788.8	11492	5848.19	10905.5	12243.2	15845.2	27269.9	17057.4	27620.9	5922.48	11563.3	11846.4	11071.4	12356.3	16288.3	29764.8	18194
1188.77	14720.7	24967.8	5424.97	10687.8	11139.2	15285.5	26915.6	5511.11	11134.7	12160.3	15591.1	27816.4	5573.37	11676.5	12262.8	5570.79	12043.1	12878.4	16128.9	27827.9	16389.1	27841.1	5747.98	12532.4	12492.3	12956.4	13518.5	16677.2	29911.9	16704.8
1187.85	14237	25206.6	5491.57	10610.2	10956.1	14873.4	25776.9	5879.44	11166.3	11877.9	15055.3	27650.5	6336.04	11925	12709.8	6363.43	11876.8	12911.4	15811.4	27782.6	15967.7	28099.2	6794.1	12915.8	13207.7	12230.4	13672.5	17364.3	28649.6	16772.2
1186.92	14450.7	24883.3	5444.67	10700.2	11056.9	15416.9	26044.2	5974.42	11016.3	12155.8	16126.1	26894.2	6055.57	11524.6	12515.7	6420.91	11469.6	12635.3	16941.5	27819.8	16656.5	27664.9	6360.07	12013.8	13074.5	12196.4	13272.1	18606.8	28113	18243.9
1185.99	14264.4	25043.7	5403.18	10592.9	11073.8	15534.9	26415.1	5873.24	10626.5	12136	15682.9	28705.2	6269.07	10629.3	12187.2	6257.68	11519.5	12990.4	16642.5	29974.5	15944.3	29208.6	6874.62	11353.6	13198.4	12288.9	13445.1	16793.2	31990	17186.9
1185.07	14472.6	25336.4	5367.11	10704.5	10934.1	14524.2	26646.1	5852.38	11327.5	11965.7	15700.3	26776.7	6264.49	12291.8	12479.2	5986.7	11932.8	12433.4	16835.5	28269.8	15806.1	28596.9	6645.23	12546.1	12869.2	12040.6	13244.4	17145.7	30117.3	15903.2
1184.14	14524	25448.1	5325.65	10662.1	11088.8	15728.8	25805.5	5359.97	10732.2	12124.3	17015.7	27388.6	5424.71	11588.3	13314.6	5528.61	11287.1	12884.9	17256.1	28185.7	17681.8	28548.7	5694.65	12151	14156.2	12392.5	13043.2	18762.3	30321.9	18498.1
1183.22	14624	25489.5	5465.12	10641.3	11259.7	15181.8	25560.1	5837.62	11451	12024.4	16476.4	27166.8	6093.33	11800.7	12312.6	6192.13	12148.3	12187.9	18117.2	28891.4	17559.3	27759.9	6359.76	11894.9	13165.9	12617.5	12827	18149.9	30791.9	19074.2
1182.29	14389.3	25501.2	5366.96	10550.3	11152.4	15529.5	26986.4	5783.14	10557.8	11849.7	17072.1	29026.5	5999.7	10898.8	12876.1	5985.34	10566.3	12425.8	17562.7	30773	18591.7	29518.7	6190.14	11107.3	13260.4	10597	12972.4	18676.3	32048.9	19456.5
1181.37	14316.6	24937.9	5376.81	10607.9	11037	14913	25027.7	5692.12	11447.1	11155.2	16187.5	27370.8	5759.83	11501.1	11470.5	5849.69	12522.6	11929.5	17582	29529.6	17127.1	28444.6	5858.33	12370.6	11697.2	13263.3	12233	18948.2	31902.4	18473.4
1180.44	14484	25289.7	5324.58	10651.9	10929.8	14903.6	25772.9	5649.59	10679.4	11913.4	15860.4	26264.4	6116.33	10887.6	12897.6	5759.21	10897.4	12829	17117.1	27431.5	16980.4	26750	6128.79	11245.9	13341.5	11608.7	13836.4	17875.4	29935.7	17571.5
1179.51	14451.8	25201.6	5420.78	10703.9	11025	15663.1	25640.6	5595.95	11411.1	11407.5	16555.2	27326.4	5814.27	12006.6	12214.4	5930.66	11451.5	11808.5	17669.6	29581.8	16906.4	27522.7	6262.59	12516.8	12539.2	11502.2	12875.4	18284.9	31188	16998.1
1178.59	14559.9	25512.8	5357.77	10812.7	11158	15323.3	27187.4	5585.8	11684.5	12035.9	15857.7	29165.4	5621.97	11717.3	12731.1	6056.91	11842	12723	16018.3	31458.2	17231.3	30431.9	5962.68	12539.2	13511.8	12296	12816.8	16129.8	34386.2	18860.1
1177.66	14222.8	25208.9	5337.94	10492.5	11134.4	14827.5	25256.9	5650.49	10974	11735	15872.6	27001.6	5951.04	11588.1	12067.9	5843.94	11160.5	12765.7	15993.4	29253.2	17456.4	29004	6356.09	12232.2	12825.7	11286.2	13463.3	17208.5	31442.4	18322
1176.73	14333.6	25436.3	5207.55	10701	10957.2	15405.4	26866	5551.72	11241.5	11131.3	15416.6	28068.2	5887.54	11730.9	11675.2	5703.67	12114.5	11335.2	15951.1	28960.2	15515.5	29977.9	6412.57	11782.9	11755	12554.9	12119	17021.8	31624	16012.1
1175.8	14576.4	25084	5282.12	10987.6	11157.4	15221.4	26525.9	5297.88	11114.8	12024.7	16137.1	27820.8	5454.34	11586.3	13069.3	5610.43	11651.7	12278.3	16929	29292.3	17368.1	27914.4	5707.82	12336	13588.6	11991.6	12488.1	18287.2	29393.5	17755.9
1174.88	14554.9	25397.7	5418.68	10810.4	11160.9	15220.6	25430.3	5789.28	11515.1	11645.2	15658.9	26682.4	5996.15	11735.1	12774.1	5933.15	11641.9	11673.5	16350.5	27880.1	16121.9	27352.6	6326.84	12793.1	12875	12774.9	11916.2	17652.4	28725.2	16800.2
1173.95	14326	25414.7	5282.95	10784.2	11301.7	15393.3	27513.3	5425.3	11486.4	12410.8	15861.5	27766.1	5804.63	11788.4	12883.2	5812.63	12090	12708.1	16865	29340	16136.8	28967.6	6171.38	11925.4	13794.4	12666.9	13482	17769.7	30165.3	17136.2
1173.02	14493.2	25283.6	5548.81	10647.6	11194.6	14699.6	27070	5860.67	11012.9	11807.6	15838.6	28814.4	6255.41	11474.7	12672.6	6108.83	11999.2	12819.5	15923	29220.4	15966.8	29495.6	6599.44	12036.7	12804.9	12525.2	13625.3	16866.8	30730.1	16783.9
1172.09	14509.5	25284.5	5372.69	10788.5	11154.9	14851.5	25737.8	5894.11	11018.4	12149.9	16181.7	28157	6389.15	11460.1	13237.3	6200.77	11267.8	12610.1	16463.2	30846.6	17197.6	29086.4	6456.36	11646.4	13243.8	12143.2	13756.4	17900.8	32879.8	18153.2
1171.17	14436.9	25212.7	5358.27	10759.6	11179.9	14896.5	27626.3	5864.69	11194.9	11769	16011.8	29623.5	6081.26	11614.5	11978	6284.99	11246	12434.8	16355.2	30296.4	16718.1	30533.9	6100.75	12656.7	12312.3	12198.3	12485.9	17970.5	32525.3	16935.9
1170.24	14466.6	25149	5462.36	11083.6	11078.3	14893.5	27637	5533.65	11749.2	11898.1	15067	29890.8	6030.6	12721.4	12631.6	5609.35	12254.3	13018.4	16300.8	32828.2	15096.8	31007.2	6237.46	13543.5	13722.1	12798	14046	16451.6	33306.8	15158.4
1169.31	14620.3	25438	5434.47	10901.2	10971.3	15011.2	25677.2	5931.94	11843.8	11938.1	15412.8	27597.9	6376.79	12398.1	13100.1	6136.48	12526.2	12453.2	15472.4	30328.1	16390.2	28644.1	6862.69	12890.5	13353.6	12615	13656.3	15731	33176.8	16840.5
1168.38	14262.3	25102.4	5406.58	10756.6	11007	15368.4	25972.8	5754.33	11289.3	11423.4	15660.3	27707.3	5902.96	11909.6	11507.6	6100.23	11483.5	11971.9	16890.1	28833.3	16812.8	28604.1	6426.18	12583.8	12171.7	11837.6	12298.6	18235.9	31706.9	18492.6
1167.45	14135.9	25197.5	5354.47	10647	10921.6	14492.1	27479.5	5855.66	11352.4	11727.2	14549.2	29509.9	5889.58	11398.3	12813.6	6204.21	11614.5	12812	15938.3	30851.4	14740.4	30678.7	6213.23	11621.3	14037.7	11773.7	13524.2	17036.9	31798.4	16011.3
1166.52	14819.8	25163.4	5313.15	10567.1	10712.4	14999.9	27344.7	5659.6	11377.7	11003.2	16245.7	29990.9	6092.6	12508.7	11217.6	5875.14	12311.2	11909.3	17302.8	31234.7	17606.8	30467.7	6566.79	13086.7	12051.4	12566.1	12833.1	18807.2	31517.7	19014.8
1165.59	14448.5	24943.7	5411.78	10570.6	10931.2	15868.5	26813.8	5918.23	10941.6	11200.1	16964.7	26912.3	6155.64	11498.5	11534.5	6274.82	11884.9	12214.8	18438.3	28980.8	17524.4	28441.4	6467.58	11516.7	11560.6	13062.9	12321.2	18721.8	29128.5	18449.5
1164.67	14427.1	25194.9	5303.19	10740.9	10991.1	14563.7	27667.9	5583.51	11570.1	10991.5	15868	28918.8	6044.75	12313.7	11120.2	5764.07	12447.3	11780.3	17116.5	29073.7	17253.4	31464.2	6179.23	13235	11742.9	12984.2	12867.6	18712.5	30793.1	18688
1163.74	14435.3	25031.7	5409.86	10628.7	11083.4	15151	25579	5632.28	11319.9	11229.7	16202.1	26999	5758.56	11537.6	11258.9	6054.56	11724.1	12181.6	16500.2	28965.3	16273.2	27936.4	5881.4	12320.9	11292.1	11836.2	13112.8	16767.6	30559.8	17731.5
1162.81	14419.3	25425.3	5336.28	10844.7	11197	14857.2	25551.6	5759.64	10910.7	11491	15670.8	25826.2	6271.65	11413.5	11710.8	6005.45	11663.9	11678	16097	28195.5	16798.9	27207.7	6676.46	11534.4	12640.4	12303.1	11921.7	16637.7	29514.4	17556
1161.88	14521.6	25324	5278.86	11052.5	11049.8	15528.4	26026.4	5296.76	11173.5	11347	16760.9	27769.5	5724.94	11512	11753.6	5424.99	12012.4	11902	17758.1	29170.6	17498.2	28445.9	6174.29	11727.9	12813.7	13171.1	13001.3	18303.8	31093.7	17855.2
1160.95	14626.6	25518.5	5342.46	10975.3	11410.9	15377.2	25919.4	5588.79	10998.8	12260	15993.8	26192.7	5690.02	11047.3	13463.1	5897.75	11351.8	12804	17191.7	26488.5	17152.2	28361.9	5693.3	11842.4	13996.4	12471.8	12824.2	18697.7	27021.6	18470
1160.02	14718	25040.8	5298.5	11105.1	11411.5	15105.9	26648.5	5377.71	11403	12103.8	15230.5	27189.8	5535.93	11587.3	13083.7	5587.92	12510.5	13017.1	15472	28748.8	16295.3	28965.1	6064.72	12560.9	13167.8	13212.4	14104.3	16369.8	29418.2	17249.9
1159.09	14567.6	25213.8	5327.12	11030.5	11447.1	15640.1	26831.3	5489.19	11245.5	11981.3	16540.4	29208.9	5692.32	12068.4	12046.5	5664.68	11496.6	12549	17574.7	30816.3	17402	31581.2	5928.04	12892.8	12089.7	11577.5	12825.6	17974.4	31615.8	17663.2
1158.16	14637.6	25273.8	5436.36	11101.1	11477.4	14918.2	27512.2	5862.72	11369.8	11835.7	14927.4	29438	6083.52	12311.6	12953.6	6372.84	11415.4	12460.3	15327.2	31377.9	15772.5	29976.4	6688.17	12690.7	13809.6	11993	13323.7	15651.1	33331.1	16988.3
1157.23	14766.6	25844.3	5489.13	11187.8	11440.4	15397.8	27906.5	5612.58	11711.9	11877.3	16783.7	29931.4	6087.03	12117.1	12164	6073.26	12015.5	11877.8	16948.8	31896.4	18190	31937.8	6451.23	12692.5	12569.3	12589.8	11918.8	17773	33413.5	19679.8
1156.3	14718.4	25401.9	5488.16	11433	11572.7	15791.9	26079.2	5548.4	11827.6	11762.5	16076.5	26706.1	5926.21	12454.3	12715.3	5723.87	12433.9	12358.9	17395.5	28566.4	16127.8	27848.5	6396.07	13119.4	12944.9	13668.6	13030	18842.4	30809	16684.8
1155.36	14466	25580	5454.95	11140.9	11388	15343.9	26877.3	5862.01	11594.3	12014	15856.1	27952	6145.37	12013.5	12618.6	6141.79	12358.8	12420.3	16454.3	29543.1	17281.3	30239.3	6481.27	12988.6	13175.6	13510.9	13236.9	17162.7	31946.2	17906.1
1154.43	14399	25621.1	5266.01	11063.7	11243.6	15397.7	27825.6	5268.33	12052.5	11697.3	15750.6	27876	5388.77	12485.4	12630.7	5581.02	13181	11815.4	15932	29556	16670.2	27988.2	5574.05	12690.3	13753.6	13465.1	11816.2	17106.9	29631.7	18043.3
1153.5	14699.8	25546.8	5286.56	10954.4	11128.9	15725.9	27962.2	5503.12	11326.5	11411	16959.9	30203.8	5672.17	12096	11412.8	5530.57	11474.8	11962.6	17670.8	32575.3	18287	32584.7	6064.63	12436.3	12489.3	11692.9	12768	18537.7	35136.2	19342.9
1152.57	14302.6	25249.6	5307.09	10896.1	11078.6	15327.4	25784.3	5781.8	11935.7	11845.1	16817.3	26435.6	5967.25	12754.1	11882.6	6204.62	12255.7	12426.9	17765.8	28358.3	18400.5	28539.1	6187.01	13043.8	12821	13114.3	13372.5	19128.3	28440	19791.8
1151.64	14530.9	25051.9	5405.46	10714.3	11033.7	15886.3	25772.1	5427.34	10813.3	11500	16348.1	26583.9	5632.94	11237.1	12003.6	5919.54	11676.1	11766.6	16591.7	27516.8	17196.6	28492	5792.91	12223.9	12156.2	12434.9	12268.8	17483.2	28125.9	18154.6
1150.71	14115	25085	5393.77	10629.2	11037.1	15348.6	26272.5	5538.09	11663.8	11285.6	16829.7	27497.5	5678.27	12630.7	12338.5	5558.83	12582.4	12106.9	17832.8	29971.5	17219.7	29066.4	6052.62	13455.6	13355.1	12734.3	12787.1	18100	30136.6	18677.6
1149.78	14227.9	25236.2	5288.17	10686.3	11059.3	15287.6	26936.6	5768.62	10942.6	12087.4	16602.3	28656.4	5944.5	11151.4	12724.7	6149.15	11360.5	12566	16692.1	29785.5	16955.6	29040	6012	11967.7	13724.4	12477	13656.6	18292.1	30736.9	17567.3
1148.84	14150.3	24917.9	5324.79	10456.4	10880.3	14268.3	26892.9	5457.84	11174.4	11837.6	14348.1	28335.6	5687.38	11608.9	12954.8	5674.9	12218.6	12514.7	14983.1	30884.7	15770.1	29953.2	6055.03	12518.7	13282.3	13306.4	13111.3	16008.2	33813.5	15882.7
1147.91	14335.5	25197.8	5130.74	10500.2	11025.9	15353.8	26579.6	5188.55	11299.1	11136.2	15533.1	29011.6	5675.04	12180.7	11792.5	5406.19	12352.4	12034.5	16941.5	31725.3	16400.3	29165.3	5935.16	12186.9	12920.9	13553.4	12535	18386.1	34679.3	17066
1146.98	14156	25045.8	5180.78	10549.3	10948.8	15502	25390.8	5540.74	10738	11577.5	16568.1	25891.5	5678.7	11743.7	11835.2	5581.7	10951.6	12497.4	18083.5	27786	17018.5	28091.9	5832.04	12680	12246.3	11131.8	13381.6	18244.7	28270.5	17518.8
1146.05	14105.2	25100.3	5155.73	10418.7	10866.4	14840.6	25456.3	5624.59	11246.6	11439.7	15110.8	27482.7	6143.31	12001.5	12376.8	6097.37	12221.6	11773.4	15528.3	28143	15977.9	27763.7	6304.19	12290.7	12459.2	13357.4	12740	16931.5	29774.7	16209.8
1145.11	14008.9	24994	5208.43	10467.8	10824.3	14291.8	27206.3	5661.04	11015	11601.3	14728.1	28288.3	6073.76	11116.9	11817.3	5909.8	11441	12716.1	15973.5	28478.9	15979.7	29207	6244.78	11468.8	12258.7	12430.2	13348.6	16251.8	28939.6	16445.1
1144.18	14290.5	24807.3	5287.91	10348	10699.1	15300.2	25603.5	5450.71	11232.7	10964	15490.3	27378.7	5871.43	12311.5	11817.3	5760.86	11310.3	11349.1	15507.9	30037.2	15623.2	29679.4	6390.68	12589.4	12530.3	11391.7	12097.3	16485.6	32668.6	16624.6
1143.25	13843.1	24513.5	5115.47	10340.8	10622.2	14637.2	26441	5244.51	10430	11051.5	15314.7	27610	5431	11288.8	11527.2	5653.93	11188.9	11187.3	16294.1	29670.7	16389.1	29506.4	5591.09	12167.2	11528	11387.6	12066.1	16866.4	30585.3	17183.9
1142.32	14258.6	24761	5141.35	10561.3	10912.3	14622.3	25982.1	5173.26	11414	11727.5	14741.4	27631.2	5656.62	11934.9	12529.8	5613.2	11486.2	12853.5	15450.5	27818.5	14945.8	28952.9	5940.19	12354.5	13107.1	12061.3	13231.3	16727.4	28200.4	15185.2
1141.38	14017.7	25070	5352.06	10508.6	10784.5	15273.3	26960.3	5582.12	10678.8	11261.3	16134.5	28075.5	5685.86	10786.6	12336.6	5793.46	11415.4	12049.4	17176	29493.5	17193	28543.4	6111.14	10973.1	12775	12335.4	12457.4	18425.7	29612.8	18476.1
1140.45	13993.8	24921	5080.61	10402.3	10498.7	14955	26089.8	5329.61	11340	11123	15313.3	26492.4	5533.68	11923.1	11167.5	5611.05	12244.9	11250.5	16325.8	27851.5	15659.6	27691.4	5710.94	12546.2	12015.2	13286.9	12204	17417.4	29685.7	16192.1
1139.52	14186.8	24520.2	5261.79	10384.3	10641.4	14427.2	25159.1	5571.38	11320.7	10884.3	15287.4	26956.3	5926.95	11722.3	11188.8	5835.27	11340.8	10918.8	15412.5	28572.7	15782.3	29095.9	6023.16	12356.7	12021.8	11388	11843.9	16447.1	30439.8	16395.7
1138.58	14208.3	24949.6	5113.61	10326.3	10754.6	14373	26637.3	5464.07	11027.7	11227.8	15549	27597.8	5997.68	11381	11360	5913.88	12015.3	12242.4	15756.7	27849.2	16263.5	28881.2	6070.83	12338.4	12110.2	12643.5	12272.9	16677.4	29508.6	16399.7
1137.65	14112.1	25084.4	5233.16	10482.4	10605.5	15483.4	27090.4	5616.26	10938	10776.8	15869.5	29426.5	5965.35	11286.9	11073.8	5932.15	11082.4	11221.9	16326.1	30124.2	17432.2	30841.5	6242.98	12355.9	11492.4	11627.1	12111	17401.3	32272.6	18693.1
1136.71	14160.5	25178.9	5087.71	10448.4	10801.7	14700	26353.7	5287.88	10729.6	11643.5	15878.7	26399.1	5301.87	11531.8	12482.4	5469.7	11555.5	12211.6	17448	26471.5	16222.8	26859.3	5313.88	12473.2	12756.8	12146	12678.7	18898	28763.3	17097.5
1135.78	14067	24556.3	5279.47	10489.4	10607.1	15262.8	24789	5463.44	10733.6	11638.3	16102.8	25433.9	5639.91	10944.3	12739.8	5646.87	11466.3	12473.1	17352.3	26653.5	16318.3	27645.4	5774.19	11810.1	13459.4	11747.9	12636.3	18400.3	28048.8	16640.3
1134.85	14366.8	25186	5249.1	10677.4	10827.3	15566.8	26422.4	5765.67	11086.9	11023.4	15781.9	26589.8	6331.41	11799.5	11142.9	6097.45	11206.8	11137.7	16840.6	28580.1	17180.6	27396.1	6867.19	12432.4	11656.8	11279.3	11863.6	17089.4	30693	18617.4
1133.91	14227.8	25082.6	5269.57	10630.1	10999.2	15169.7	27172.1	5472.36	11052.7	11105.6	15812.7	28104.3	5698.68	11229.1	11733.3	5986.83	11893.5	11107.9	16425.8	30017.9	15970.6	28873.2	5929.13	11559.5	12206	12075.2	12212.1	17354.8	32233.4	16800.8
1132.98	14423.2	25131.6	5418.4	10601.4	10959.8	14582.6	25684.9	5736.72	11377.7	11013	15025.9	26915.5	6192.86	11401.4	11590.8	5798.53	12208.7	11151.6	15290.7	27184.2	15871.1	26921.8	6401.41	12209	12638	12387	11280.4	15557.3	27856	17105.3
1132.04	14468.8	25244.8	5232.93	10899	10909.7	14540.6	26003	5499.98	11689.4	11868.8	15069.3	27915.2	5746.68	12588	12613.3	5642.56	12373.1	11992	15707.3	28003.1	16324.8	29436	6023.8	13028.8	13669.1	12401.4	12179.7	16824.6	30052.4	16507.3
1131.11	14645.3	25419.5	5191.9	10939.9	11167.1	14874.6	27119.9	5346.2	11562.1	11429.1	15103.8	27329.6	5501.48	12202.8	12131.2	5802.42	12573	12367	15452.2	29588.8	15416.3	27950.8	5926.01	13075.1	12641.6	13333.6	12909.7	16640.4	31696.7	16766.6
1130.17	14517.1	25321.4	5485.01	10828.4	11277.4	15602.7	25750.8	5649.58	11306.5	11936.8	16554.6	26983.6	5731.49	12309.3	13120.2	5799.26	12399.8	12087.7	17672.4	29678	16705.4	29250.2	5768.72	12889.3	13645.2	13018.8	12873.7	18686.9	30939.1	18069
1129.24	14666.9	25864.8	5302.3	11133.8	11219.3	15192.9	27208.7	5674.09	11543.2	11865	15614.1	27264	6221.54	12253.2	12746.6	5763.17	12064.1	12005.2	16520.8	29014.5	16307.6	29351.3	6345.93	12763.1	12822.2	12256.1	12844	16862.9	31586.1	16739.8
1128.3	14584.1	25694.5	5376.18	11155.8	11225.3	15579.3	26885.2	5525.26	11856.5	12020.9	17135.7	27329	5783.39	12645.3	12712.7	6067.02	12538.9	12487.3	17965.4	27555.7	18714	29426.7	5891.98	13886.7	13251.6	12826.5	13286.3	19255.1	30246.7	20186.2
1127.36	14522.7	25748.7	5492.77	11364.9	11453.1	15085	27823	5917.32	12316.6	12478.6	15508.3	28335.5	6149.16	12971.5	13347.7	6040.47	13227	12958.2	16851.4	29947.8	15784	28406.8	6212.75	13080.7	14349.6	13703.5	13793.8	17599.5	32556.4	15871.4
1126.43	14637.7	25359.5	5435.7	11143.9	11354.9	15619.8	27109.9	5897.39	11331.8	12437.5	16806.3	27267.7	6286.24	12440.7	12927.5	6211.36	11384.9	13468.7	18010.8	28717.1	17120.8	29801.7	6299.38	13306.6	13328.4	12363.7	14548	19671.9	30071.4	17419.1
1125.49	14661.8	25496.5	5445.42	10888.2	11545.1	15903.4	27208.9	5775.46	11819.8	12485.9	17391.6	29417.6	6240.98	12206.5	12989.2	5859.25	12974.2	12992.1	19077	30360.3	18897.7	31783.2	6325.96	12663.5	13378.7	13346.8	13763.1	20958.6	32561.9	20232.3
1124.56	14747.3	25259.7	5294.92	11139.9	11129.2	16058.8	26051	5711.35	11720.1	11655.2	16399.6	26333.3	5990.78	12103.8	12701.7	5721.25	11741.8	12110.2	17658.5	26735.8	17346.8	27313.6	6248.28	12284.6	13569.4	11900.2	12820.3	17700.7	28173.1	18340.4
1123.62	14368.2	25447.4	5438.15	11084.5	11145.9	14790.8	26575.4	5455.02	11228.2	11962.7	14930	27892.5	5970.91	11727	12446.5	5990.9	11841.3	13138.1	16073.8	30576.3	15154	29179.4	6523.78	12579.4	13245.9	12055.5	13334.1	16197	33524.4	16424.7
1122.68	14621.9	25533.7	5407.82	10866.4	11288.1	15313.8	27480.4	5520.63	11590.4	12032.9	16033.6	29184	5653.06	12173	12571.1	5529.62	11987.7	12476.8	16934.8	31504.5	16229.6	30725	5777.26	12249.9	13082.2	13097.9	13670.8	18458	34420.6	16490.3
1121.75	14544.6	25425	5404.19	11080.6	11238	15200.5	27638.5	5930.42	11285.7	11881.7	16085.4	28707.9	6412.01	11368.2	12647	6498.52	11724.9	12782.5	16631.5	29565.1	17693.6	28894.4	6904.39	12084.1	12965.1	12586.2	14003.6	17381.2	29782.2	18678.4
1120.81	14496.7	25247.1	5272.48	10963.9	11084	15562.6	25874.1	5478.72	11789.5	11317.9	16925	27520.8	5721.13	12791.1	11400.9	5700.38	12238.1	11568.5	18383.1	29332.1	18324.5	28256.6	5774.66	13558.6	12009.2	12750.1	12070.4	19131.6	32180	19298.6
1119.87	14654.2	25536.1	5292.89	10815.2	11244.7	14764.1	27693.6	5708.91	11810.5	11840.5	15234.6	29899.9	5721.91	12729.3	12739	6274.46	12377.3	12614.4	15704.3	30147.7	15636	29923.7	5783.01	13911.8	13866.4	12822.5	13674.8	16952	32702.6	16075.9
1118.93	14830.3	25227.4	5201.26	10858.6	11061.3	16274.5	27124.7	5225.6	11646.4	11736.2	17817.5	29402	5336.85	12433.8	12175	5425.14	11986.7	12021.4	19344	32193.3	18346.2	29945.7	5566.29	12733.9	12422.7	12595.9	12468.9	20443.7	32768.7	19839.6
1118	14459.6	25572.3	5333.68	10854	11112.7	15217.1	26607.9	5492.15	11139.5	11516.9	16029	27624.2	5544.67	11559.3	12155.6	5768.81	12015.2	11935.7	16666.5	29423.3	16696.4	28551.8	5639.91	12038.7	12812.6	12732.6	13062.3	17619	30205.8	17049.5
1117.06	14438.4	24951.8	5335.39	11030.7	11158.7	15460.9	26128.1	5838.87	12017.7	12028.7	16457.1	27223.3	5930.73	12692	12593.3	5970.91	12223.9	12611.3	17597.8	27599	17400.1	27448.8	6460.68	13398.3	13152.6	12261	12868.2	18022.3	28572.8	19024.1
1116.12	14627.7	25664.5	5417.09	10956.8	11266.1	14974.9	27274.3	5712.18	11096.9	11693.5	15204.4	28031.1	5861.09	11901.3	12687.8	6203.19	11603.5	11826.6	16457.1	30767.7	15598.1	29377.2	6306.21	12881.9	13448.6	12093.2	12886.2	17629.3	32175.7	16516.1
1115.18	14614.5	25665.3	5440.11	10752.3	11080.1	15697.3	25812.6	5510.93	11112.4	11712.2	16060	26088.8	5926.51	11487.9	12641.9	5935.57	11915.7	12682.4	17629.6	27701.1	17657.6	26644.6	6058.61	11534.5	13261.4	11947.5	13859.8	18508.8	29491.4	18941.1
1114.25	14566.6	25404.9	5289.91	10952.9	11259.4	15372.2	27906.8	5697.8	11276.1	11883.8	16005.1	28091.2	6154.7	11775	12934.6	5967.79	11650	12477.6	17161	28620.6	16256.5	30687.7	6652.52	11816.4	14143.6	11981	12719.5	18773.5	30286.7	16376
1113.31	14798.5	25645.5	5331.6	10935	11033.6	15499.2	26979.1	5587.13	11091.4	11472.8	16469.6	27853.2	5737.28	11513.1	12286	5708.09	12078.3	12054.4	16528.2	28269.2	17364.8	30562.4	6211.66	11902.3	12643.5	12398.1	12961.8	16998.6	30180.6	18984.8
1112.37	14588	25353.2	5386.6	10885.1	11183.4	14920.4	26963.1	5868.3	10996.4	12168.4	15457.2	27517.8	6408.56	11097.4	12553.4	5953.85	11993.8	12335.6	16380.8	28083.9	16554.4	28289.3	6510.16	12029.6	13028.1	12055	12965.5	16499.2	28731	16763.8
1111.43	14521.5	25447.3	5359	10755.3	11288	15388.9	27807.5	5697.01	10974.7	12085.9	16519.9	28531	5714	11569	12364.2	5830.8	11393.4	12297.8	17427.2	31279.7	16792.6	31258.9	5876.02	11827.9	13449.1	11887.4	12789.2	17761.6	33528.7	17747.8
1110.49	14630.8	25165.8	5262.18	11211.4	11144.8	15732.3	27343.5	5394.16	12282.5	11290.5	16671.8	30006.7	5609.23	13180.6	11747.3	5562.96	12825.8	12124.3	16785.4	30572.5	17491.8	31991	5840.99	13483.6	12103.6	12839.7	13280.1	17841.1	31230.6	18929.9
1109.55	14644.1	25568.7	5434.31	10929.9	11190.8	15284.4	25902.3	5657.54	11555.7	11459.9	15476.1	26594.2	5929.62	11628.8	11546.2	5659.41	12416.3	11960	16513.8	28505.1	16065.7	28013.9	6008.62	12143.1	12189.3	13514	12378	18164.5	30083.7	16464.8
1108.61	14795.9	25439	5353.48	11079.7	11335.2	15839	26880	5764.93	11992.2	11550.4	16613.8	29289.1	6318.89	12372	12038.8	6252.63	12145.8	12664	17163.5	30632.1	17003.4	31586	6470.39	13283.1	12530.5	12887.1	13401.4	18264.5	30777	18554.4
1107.67	14684.2	25471.8	5554.81	11216.1	11389.1	15923.6	26700	5904.46	12319.7	11692	17437.7	28173	6395.74	13148.4	12084.4	6246.77	13130.9	11940.3	18620.8	30766.6	19086.6	28404.3	6979.22	13455.1	12326.8	13449.6	12318.9	20474.2	31027.9	20307.9
1106.73	14841.2	25773.3	5412.78	11309.9	11328.5	16317.1	27788	5453.4	11528.1	11922.9	17807.2	30185.6	5938.84	11885.7	12766.5	5800.72	12036.8	12657.9	19192.7	32741	18586.8	31040.7	6124.56	12854.4	13761.4	12197.4	13209.1	20491.9	34095.5	19930.1
1105.79	15032.8	25981.5	5526.23	11337.1	11496.8	16008.5	26866.9	5721.02	11472.8	12000.5	16932	27881.6	5769.67	12585.2	12474	5930.24	11538.4	12187.3	17400.1	28639.1	18183.7	30217.2	6128.87	12758	12886	12460.3	13056.7	18130.7	30393.1	19428.7
1104.86	15000.9	25753.4	5416.18	11308.5	11484.1	15217.5	25939.8	5545.56	11444.4	11798.6	15832.9	27250.7	5929.93	11499.6	12917	5736.99	12528.9	12546.5	16406.4	29444.2	16432.6	27663.1	6332.85	11926.2	13471.8	13616.9	13266.5	16460.5	30514.3	17869
1103.92	15054.1	25685	5420.53	11375.7	11615	15141.2	27245.7	5801.78	12105.3	12497.3	15152.6	28918.7	6239.84	12131.9	12940.5	6059.37	13143.4	13058.1	16083	30379.4	15753.3	30711.7	6587.46	12726.4	13877.4	13638.1	14293.3	16728.2	31845.3	16508
1102.98	15083.3	25805.4	5408.93	11400.2	11578.4	16110.7	27441.6	5679.85	12269.9	12162.5	16206.5	27948.9	5792.65	12670.3	12878.5	6183.28	12834.3	13254.2	16974	28432.8	17045.7	30720.6	6211.85	13704.5	13618.8	13237.6	13790.7	18426.3	30052.7	18738.7
1102.03	14798.8	25699.8	5620.67	11257.3	11597.6	15526.8	26112.3	5744.94	11638.5	11715.3	16738.8	27803.1	6256.93	11731	12553.3	5760.14	12027.2	12291.2	17160.4	28076.8	16971.2	30274	6282.43	12107.6	13072.2	12419.9	12571.3	18360.7	28537.5	18454.4
1101.09	15136.4	25761.7	5510.68	11297.8	11582.3	15791.2	27777.5	5997.06	11348.9	12484.2	16954.6	29147.5	6300.29	11604.9	13607.6	6006.05	12398.2	13307.1	17290.3	31458.2	17142.6	31615.6	6407.2	12706.7	14797.4	13071.7	13670.1	18973.8	32465.7	17868.3
1100.15	14875.9	25967.1	5395.41	11317.1	11508.4	15828.1	26318	5866.46	11422.7	12618.4	17123.6	27957.7	6231.13	11752.5	13380.8	6364.08	11442.8	12831.6	17878.4	29573.6	18742.1	29239.6	6293.12	12389.1	14711.4	11764.7	13205	18798.1	31648.9	18898.1
1099.21	14968.9	25912	5646.9	11453.2	11633.9	15442.2	27051.1	5917.22	11872.3	12130.8	15923.8	28380.2	6058.27	11879.1	12385.9	6429.29	12763	12424.5	15983.8	30010.8	16909.9	28752.4	6353.74	12016.9	12811.9	13455.5	12831.3	16487.6	30718.6	18116.2
1098.27	14846.7	25830.3	5619.33	11392.8	11703.6	15045.7	27280.3	5658.3	11896.4	12149.7	16152.3	29978.6	5704.7	12074.9	12505.6	5920.35	12790	12926.6	16159.9	32598.6	17572.1	31880.7	5848.84	12263.8	13641.2	13846.5	13210.7	17000.4	32902.2	18797
1097.33	15327.5	25775.2	5562.54	11393.4	11698.9	16415.4	27489.7	6098.47	12134.4	12040.5	17282	29059.3	6419.5	12575.1	12270.1	6664.96	12207.6	13239.3	18422.5	29780	17925.7	31951.9	6652.79	13313.3	13342.9	13372.7	13437.9	20199.1	30031.4	18222
1096.39	15202.6	25826.4	5566.86	11356.8	11694.1	15488.9	28325.9	5727.06	11956.5	11806.8	16503.3	30111.3	5917.91	13123.9	12580.2	6070.8	13096.9	12208.5	16700	30207.2	16521.5	30781.2	6327.32	14364.9	13801.9	13700.2	12862.4	18129.8	33131.9	16674.9
1095.45	15282.2	25898.8	5738.48	11484.9	11904.5	15822.4	26260.6	6307.18	12332.4	12299.3	16445	27893.9	6847.88	13050.6	12837.6	6385.29	13231.8	13528.3	17518.4	28033.3	17514.1	30597.3	7295.44	14295.9	13507	13771.6	14166.9	18616.1	28740.5	18487.9
1094.51	15112.3	25615.4	5663.11	11512.1	11761.6	15640.6	25686	5673.84	11746	11990.8	17046.4	27493.8	5852.83	12364	12813.3	5941.43	12536.2	12413.7	17591.9	28490.3	17711.7	28681.7	6016.4	13415.2	13845.8	13685.3	12584.1	17671.6	28740.3	19362.7
1093.56	15194.5	25857.7	5603.71	11544.5	11515.3	15277	27686.6	5714.76	12530.6	12613.8	16189.2	29139.4	6189.87	13313.6	12778.3	6154.78	13753.1	13593.9	17132.3	31440.8	16896.1	31197.2	6567.47	13732.7	13894.3	14372.5	13929.8	17592.4	31530.5	17488.3
1092.62	14982.1	25882.3	5687.64	11404.5	11659.3	16418.9	26786	5933.8	11562.2	11912.6	17472.3	29225.3	6287.08	11761.3	12431.5	6472.44	12702.9	12224.2	17758.6	29577	18417.4	31289.4	6777.51	12770.3	12810.6	13703.4	12552.8	17817.9	29953.3	18593.7
1091.68	15228.9	25986.5	5670.7	11511.2	11559	15555.6	26139	5891.73	11912.5	12440.7	16921.2	26264.3	6214.83	12306.4	13622.7	6455.49	12051.3	13142.3	17269.4	27281.9	17187.3	27499.1	6483.14	12927.8	14324.4	12905.6	13313.4	18166.8	27892.8	17715.1
1090.74	15202.3	25833.3	5526.42	11379.2	11838.2	15938.9	26957.6	6057.22	12023.2	11852.2	17196.9	29209.2	6435.04	12629.7	12100.3	6577.09	12438.7	12043.9	17753.2	31159.7	17464.4	32062.1	6934.29	13079.1	12129.2	13372.1	12159.6	18282.2	31854.5	17504.9
1089.8	15167.8	25879.1	5724.39	11435.5	11891.8	16422	27168.1	5766.6	12381.2	12623.3	17880.7	29419.4	5784.93	13497	13786.1	6059.67	13233	13529.2	18510.2	30717.1	19404.5	30723.8	6257.45	13832.7	13937	13361	14171.3	19773.5	31016.7	19573.7
1088.85	15196.9	25914.3	5577.5	11507.7	11834	16690.5	27252.7	5995.64	12168.6	12938.1	17172.7	27534.5	6147.06	12548.1	14069.7	6475.25	12660.6	13882.7	17736.3	28745.1	18322	28522.7	6464.44	13799.2	14304	12681.2	14386.1	18021.5	30903.5	18672.6
1087.91	14891.9	26233.2	5706.44	11534.9	11675.4	15152.6	27505.3	6157.72	11687.7	12482.6	16035.1	27887.4	6672	12795.5	13146.4	6342.39	11917.7	13013.5	17598.8	28228.1	16302.6	30039.5	7150.93	13533.6	14165.2	12618.2	14272.9	19170.6	30180.4	17836.8
1086.97	14891.9	26066.8	5798.21	11620.3	11729	16377	26697.8	6281.67	12573.2	12633	17711.4	28248.6	6652.31	13443.8	13588.5	6565.98	13749.2	12908.4	19066.5	30745.6	18565.3	28807.2	6961.7	13692.6	14234	14693.1	13190.3	20104.4	32832.7	19728
1086.02	15257.7	25969.4	5487.04	11536	11541.3	16077.8	27239.2	5759.45	12597.6	12589.2	16280.7	27392	6156.67	13845	12971.1	5842.92	13605.4	12780.3	16493.4	27812	17729.3	28388.5	6626.38	14833.1	14228.4	13800.6	13311.1	16865.8	30361.9	17967
1085.08	15135.7	26060.1	5711.34	11552.5	11796.4	16094	27510.2	6240.24	12518.4	12196.4	16224.6	28768.3	6840.16	13706.4	13260.4	6826.65	12769.9	12405.5	17832	31361.4	17141.2	29429.2	6984.39	14653	14260.7	13973.7	12744.3	19013.7	31948.4	18048
1084.14	15050.9	25999.8	5498.34	11425.9	11733.3	15631.9	28332.7	5912.55	11579.6	12310.8	16513.4	30323.1	6182.54	12246	12467.6	6149.06	12568.9	12529.5	17087.7	31918.8	16948.8	30513.6	6527.56	12404.4	13526.7	13010.7	13627.4	17828.9	32566.8	17961.2
1083.19	15130.3	26233.6	5775.54	11389.5	11908.7	15239.6	26706.3	6345.68	11578.7	12759	16549.5	28574.8	6899.84	12132.4	13941.1	6644.44	12604.8	12816.5	17097.1	31373.6	18093.6	31395.9	6963.65	12881.2	15323.8	13441.7	13698.6	18523.1	33861.4	18153.5
1082.25	15154.1	26168	5824.83	11459	11909.3	15580.4	28001.2	6066.07	11968.5	12131.2	16630.9	28947.1	6340.81	12984.9	12944	6379.66	12699.2	12617.9	17169.1	30093.1	16723.7	31502.7	6499.08	13654.3	13754.6	13090.8	13808.9	18460.2	31432.5	16735.4
1081.31	15132.9	26105.1	5633.11	11528.4	11668.8	16461.1	26893.9	5680.74	12552	11831	17027.5	27463.5	5904.38	13623.1	12633.4	6216.63	12586.3	13007	17272.2	29892.8	18127.7	30199.5	6206.05	14294.3	13237.2	13494.3	13479.4	18272.1	32684.4	18414.4
1080.36	14934.2	26095.2	5738.02	11642.9	11669.3	15505.2	26498.9	6166.29	12769.2	12721	16817	27392.4	6368.77	13021.3	13976.7	6382.81	12852	12738.4	18347.2	29562.2	18372	27731.9	6831.92	13940.6	14050	12870.6	13476.9	18414.3	30622.3	20166
1079.42	15082.5	25968.7	5726.41	11405.2	11839.3	15820.1	27625.7	5740.33	12018.4	12751.4	16820.7	28849.6	6186.62	12301.9	12965.8	6223.22	12901.8	13400.4	16959.7	30221.3	17767.6	31503.7	6537.96	13111.3	14110.1	14094.7	13420	17620.4	32602	17810.3
1078.47	15032.1	25508.8	5775.68	11403.1	11630.8	15255.2	26990.9	6247.29	12104.9	12672.8	16020.9	28349.4	6622.22	12995.9	13714.3	6847.34	12856.3	13393	17593.3	28940.1	16683.3	29169.1	7251.02	14238.2	13730.5	13185.9	13736.1	17932.3	30390.5	17279.7
1077.53	14942.1	26202.9	5766.71	11411.7	11684.3	15083.4	26286.3	5786.15	11887.2	11806.9	16557.6	27513	6298.62	12882.5	12387.8	6036.24	12596.9	12161.7	17004.1	28503.5	18056.5	28107.3	6907.95	13985.5	12507.6	13492	12567.3	17316.7	30146.6	19141.6
1076.58	14865.4	25986.6	5670.43	11340.9	11568.4	16036.1	27528.8	5794.24	12461.3	12066.4	17203.1	29705.3	6322.03	13251.7	12486.3	5841.69	12696	13252.5	18399.6	31882.6	17888.5	31202.5	6407.79	13536.9	12811.1	13530.1	13775.6	19187.5	33311	18102.9
1075.64	14905	25952.9	5732.91	11354.7	11497.6	15477	26835.9	5988.47	12468.3	11516.7	16881	28282.6	6222.59	12738.8	11605.7	6485.05	13033.6	12304.8	17830.7	28430.7	18503.6	29512.8	6538.77	13038.9	12146.7	13271.3	12862.6	18017.4	31029.8	19431.8
1074.69	15127.2	25726	5517.64	11519.3	11585.4	16401.2	28144.3	5898.64	12361.8	11937.7	17852.1	29028.5	5964.81	12839.5	12446.6	6474.03	13486.4	12785.9	19162.7	31300.1	19060.8	31428.5	6493.47	13133.3	13134.1	14195	13249.9	20660.7	33050.9	19611.2
1073.75	15008.1	25925.1	5617.15	11549	11496.1	15214.7	27447	6155.18	11807.9	12126.8	16107.7	29412.7	6350.7	12576.2	13325	6192.79	11971.1	13324.8	16501.9	29850.3	16189.3	29707.7	6630.88	13497.8	13676.6	12130.3	14257.9	17850.1	30849.5	17557.4
1072.8	14825.7	26113.5	5769.5	11306.3	11740	15659.6	26725.7	5953.33	11664.9	12507.7	16920.9	28203.7	6043.43	12653.7	13316.2	6321.77	12028.4	13254.9	17954.4	30336.7	18081.1	30761.6	6274.05	13743.4	13710.1	12890.6	13963.3	19235.4	33205.9	18476.8
1071.86	14918.2	25714.9	5734.11	11333.4	11552.8	15420.3	25918.6	6253.47	11735.1	11852.2	16525.6	27878.9	6407.95	12438.6	13024.5	6723.8	12435.3	11944.7	17182.9	28458.1	17532.5	28677	6533.83	13378.1	13845	13099	12737.4	17724.7	28891.4	18293.4
1070.91	14889.1	25755.3	5664.36	11225.6	11537.5	15140.2	27048.5	6053.37	11687.8	12651.6	16268.9	28859.1	6494.61	12372.1	13743.5	6216.71	12318.2	13258.8	16876	30708.3	17500.5	31441.4	6875.79	13325.7	13836.7	13360.8	14127.8	17437.2	32424.8	19214.2
1069.97	14910.2	25977.9	5597.28	11263.3	11572.5	15677.6	27245.6	5957.01	11493.3	12121.7	16579	28595.4	6353.66	12382.7	12730.1	6254.59	12358.8	13228	18128.9	29877.3	17370.7	30552	6815.25	13156.1	13520.4	13274	13889.6	19685.4	32298.9	18326.1
1069.02	14743.8	25933.7	5762.75	11219	11607.4	15273.6	26804.3	5900.6	12225.4	12460.6	15487.2	29062.7	6154.51	13178.9	12861.2	6377.51	13236.9	13511.9	15525.9	30313.5	15845	29191.2	6232.34	13451	13329	14425.9	13569.1	15954.4	32977.3	17192.8
1068.07	14923.4	25955.5	5666.61	11338.5	11639.7	14953.2	28415.9	6070.25	12214.6	11774	15716.7	29672.7	6533.72	12743.4	11846.9	6116.76	12574.3	12102.2	16906.5	32536.3	16107.4	30938.1	7018.12	13699.1	12669.6	12659.4	12242.1	17168.9	33429.5	17423.8
1067.13	15015.8	25744.8	5808.23	11262.5	11590.1	15689.1	27002.3	5923.92	12076.9	11872.9	16052.4	27020.8	6457.5	12087	12185.9	6355.34	12933.3	12972.8	16619.2	28147.4	16121.9	28787.2	6520.9	12843.7	12613.1	13924.7	13324.2	17254.6	28190.8	16925.3
1066.18	14976.2	26123.1	5878.5	11625	11630.2	15117.4	27905.9	5894.94	12669	12127.7	15877.9	28803.5	6351.36	13277	12633.7	6308.53	13664.1	13117.3	17464	28892.3	16536	30724.5	6798.06	14048.9	12817.8	14187.2	13542.6	18811.2	31352	17617
1065.23	14881.1	26102.6	5769.19	11438.1	11979.3	15768	26821.3	5820.96	12493.9	12796.3	16765.7	27732.5	6131.63	13014.8	13554.3	6277.71	13265.8	13323.5	18257.9	29874.8	17289	28698.8	6724.82	13638.7	13962.9	13946.1	13348.4	19136.9	32685.4	19001.2
1064.29	14989.3	26076.9	5686.33	11362.1	11628.7	16250	26771.1	5825.38	11646.5	11989.2	17317.5	27369.7	6097.72	11832.4	12975.6	6153.32	12229.8	13096.9	17784.3	29188.1	17741.1	27903.4	6628.05	12588.8	13494.6	12564.8	13892.2	19021.3	31265.3	19058.5
1063.34	14770.2	25797.7	5716.99	11642.5	11790.3	15702.4	27823.2	5925.72	12333.4	12087.7	16500.9	30189.5	6265.48	12669.2	12594.2	6064.73	13136.5	12994.9	16571.7	32486.9	17341.5	31223.3	6779.92	13524.6	13503.3	13179.3	13491.7	16818.7	33995	18433.4
1062.39	15155.5	26381.6	5639.44	11453	11643	15444.6	27900.5	5728.7	11614.5	12508.6	16550	28751.8	6024.27	11788.4	12758.6	6269.26	12016.2	12818.6	17624.4	30098.1	17437.3	31296.3	6352.45	12200.7	12904.8	12060.9	12935.4	17868.4	31354.8	17891.2
1061.44	14733.3	25825.4	5823.12	11350.7	11619.9	15210.6	26170.2	5906	11374.5	11934.4	15323.2	27185.5	6459.9	11518.7	13089.7	6278.7	12121.4	12833.9	16448.8	27247.3	16751.1	29419.1	7032.72	12658.6	13494.2	13040.5	13194.8	18014.6	27481.5	17863.2
1060.5	14894.2	25929	5700.73	11364.5	11675.8	15875.2	28196.2	5849.07	12039.4	11714.3	16993.5	28339.5	6014.15	12486.6	12167.6	5971.02	13164.2	12266.2	17431.1	30614.2	18477.2	30078	6191.3	12564.3	12598.6	14364.4	12297.3	18139.9	30750.3	19118.9
1059.55	14925.8	25855.8	5641.69	11336.1	11497	15925.5	28008.5	5763.01	12091.5	11596.4	16005.4	30201.2	5772.23	12432.5	12660	5849.65	12585.1	12075.1	16900.4	31595.1	17292.9	30290.6	6153.59	13590.3	13399.3	12804.3	12558	17880.1	31817.6	17994.8
1058.6	15073.5	25474	5738.25	11334.1	11605.7	15900	26731.9	5971.79	11668.6	12599	16016.1	27920.9	6407.56	12486.3	12755.4	6363.12	12482.2	13609.5	16359	28211.8	17153.3	30615.3	6650.24	12738.5	13418.6	12707.7	14796.8	17626.1	28347.5	18123
1057.65	14846.7	25894	5663.4	11305.7	11611.6	15776	27311.5	5978.41	12199.3	12428.7	17150.5	27428.8	6483.47	13280.5	12952.4	6159.99	13078.1	12983	17407.9	28951.1	18071.5	29066.2	6752.05	14122.8	13892.9	14355	13168.7	17452.5	30039.2	19147.8
1056.7	14986.4	25678.5	5596.49	11298.4	11691.2	16271.4	27248.8	5627.06	12228.7	12683.2	17269.9	27495.2	5649.34	12473.3	12942.7	6130.22	12306.8	13088.8	17335.9	27904.8	17890.9	29846.1	5790.56	12511.6	13418.7	12598.3	13405.5	17982.3	30118.2	18914.3
1055.76	14920.4	25845.2	5740.45	11212.1	11602.1	15237.1	26870.8	6276.22	11878	11626.9	16191.4	28745.2	6341.37	12127.3	12382.5	6402.77	12926.1	11900.8	17212.8	29163.2	16517.8	30867.1	6415.91	12613.5	12459.5	14153.8	12167.2	18719.6	29620.3	16544.4
1054.81	14833.4	25740.5	5576.04	11339.2	11426.1	16039	26013.1	6116.73	11587.6	11974.3	16413.9	27232.7	6227.68	12365.7	12964.8	6402.92	12698.8	12364.7	17709.7	29882.7	17493.7	29387.4	6746.8	13207.5	14198.5	13816.3	13137.9	18924.1	32488.4	18795.7
1053.86	14638.5	25706.9	5690.98	11366.1	11450.5	15290	26496.1	6188.2	12278	11640.7	15730.6	28680.9	6483.95	12724.1	12624.7	6353.19	12628.6	11824.5	16558.5	29481.4	17164.4	28755.1	6548.09	13261.7	13337	12840.5	12557.8	16770.9	31307.2	17953.8
1052.91	14775.5	25373	5655.71	11227.1	11390.5	15897.1	25580.8	5716.78	11439.6	11717.4	17350.6	28048.7	6016.31	11502	12366.2	6250.55	12575.4	12803.8	18656.5	28274.9	18886.9	29266.1	6520.76	11962.1	13464.4	13314.8	13490.8	19702.1	30256.4	20756.9
1051.96	14801.8	25911	5649.44	11109.2	11506.9	15599	27134.2	5773.75	11357.3	11520.8	16820.5	27674.3	5829.96	11851.8	12563.1	6269.02	12084.9	12020.5	18291.5	28031.6	17886.6	29463.7	5865.11	12266.8	12935.5	12397.9	12251.9	19293.3	28152	19121
1051.01	14867.6	25735.2	5595.76	11210	11475.9	16309.1	27407.3	6006.73	12065.1	12179.7	17031.1	29038.9	6373.21	12687.4	12544.1	6410.26	13186.5	12899.3	17347.2	30612.7	18009.3	29542.8	6419.41	13329.2	13062	14373.7	12978.8	18567.3	32037	18896.1
1050.06	14743.8	25651.6	5536.84	11236.9	11302.7	16195.3	27898.7	5757.62	11881.1	11572.2	16480.6	28244.3	5849.97	12943.8	12170	5954.16	12104.3	12198.3	17928.2	29704.4	17955.7	29253.6	6290.93	12974.7	12759.4	13129.8	12966.8	19234.5	31739.2	19266.4
1049.11	14754.4	25649.7	5609.55	11221.7	11456	15692.1	26497.6	5999	11285.9	11773.9	16982.1	27058.7	6539.96	11331.4	12380	6381.98	12177.5	12597.5	18012	28766.9	17372.5	27340.3	7154.63	12135.4	13298.4	12746.5	13459.6	18285	30709.3	18361.4
1048.16	14838.6	25558.3	5566.44	11296.1	11338.2	15684.9	27070.8	5937.72	11437.6	11556.4	16809.8	28972.7	6366.95	12143.7	12202.7	6373.52	12200.7	12543.3	17154.8	29250.6	17267.3	29375.5	6984.77	12394.8	12856.1	12894.8	13000.5	18624.9	31238.3	17809
1047.21	14717.5	25432.6	5662.81	11309.8	11328.2	15875.9	27862.4	5729.76	11966.3	11583.4	16868.2	29744.2	6275.77	12929.4	12155.3	6250.96	12198.9	11588.8	17263.6	31727.3	16975.6	32090.2	6697.63	14124.7	12816.6	12680.4	12453.4	18168.5	34784.6	17802.5
1046.26	14670.2	25522.8	5580.24	10973.7	11092.1	14884.7	26279.2	5863.13	11026.5	11790.5	15834.4	26376.8	6231.36	11607.2	12862.6	5885.6	11665.9	12242.7	16780.5	26560.9	17262.8	27429.1	6325.85	12712.6	13569.2	12561.3	13034.9	17381.6	27393.2	17359.2
1045.31	14885.9	25626.1	5524	11211.1	11390	15708.4	26103.4	5811.52	11811.8	12512.2	17165.7	28098.9	6266.63	11958.9	13152.5	6213.05	12909.4	12870.3	18159.3	28772	18688.1	29893.1	6647.71	12757.3	13253.7	13062.6	13035	18592	31208.8	18969.1
1044.36	14654.4	25608.4	5399.4	10993.4	11406.3	15021.2	26371.8	5568.53	12053.6	11521.7	15406.7	28025	6017.35	13229.5	12015.7	5854	12987.9	12243.3	15939	29038.1	16544.9	28872.5	6376.74	14425.9	12516.6	13737.6	12996.3	16561.7	31229.8	17183.5
1043.41	14551.9	25490.7	5440.51	11101.9	11236	15385.1	27136.5	5889.53	11852.8	12296.4	16068.2	27931.1	6248.83	11992.7	12611.3	6109.23	12403.2	13001.1	16836.2	28721.9	16732.3	30652.3	6587.93	12967.3	12644.5	13429.2	13155.5	17996.6	30891.2	17809
1042.46	14812.2	25199.6	5586.76	11215.6	11365.5	14980.9	27121.7	5747.6	12293.2	11977.9	15790.1	29807.5	5982.66	13035.3	12062	6132.5	12365.5	12816	16294	31489.7	16021.9	32658.7	6515.41	13728.6	12820.7	12829.6	13650.5	16884.4	32645.3	16704.1
1041.51	14664.9	25234.5	5370.22	11253	11300.3	14861.1	27001.5	5643.46	12261	11494	15100.2	27999	5834.89	13132.6	11646.9	5942.25	12341.4	12087.2	15651.9	29056.8	15557	30196	6250.47	14150.4	12468.1	13179.5	13007.5	17075.9	30418.3	16565.3
1040.56	14628.1	25574.3	5642.59	11048.6	11240.5	15022.7	27195.7	6123.99	11701.1	11491.5	15388.8	28368.9	6189.7	11954.6	12341.5	6692.49	12676	12205.8	15976.8	31061.1	16745.8	30628.3	6392.13	12568.7	12992.1	13207.4	12355.3	17434.4	34014.2	17882.4
1039.6	14622.9	25398.9	5620.55	10928.4	11354.1	15037	27412.8	6005.64	12020.4	11563.7	15635.3	28604.8	6480.98	12417.2	11828.3	6482.24	12683.9	12454.8	15716.2	31258.9	15959.3	30391.6	7004.33	12557.1	11864.3	13483.8	13527.6	16213	33383.5	15964.7
1038.65	14562.5	25633.4	5561.75	11039.4	11391.5	15196.2	25962.7	5765.73	12098.4	12402.4	15898.9	27399.2	5965.37	12617.1	13557.4	6228.48	12862.8	13041.6	16333.8	29785.2	16894.6	30034.7	6435.99	13281.9	14138.2	13541.8	13743.8	16629.4	30820.2	17984.6
1037.7	14662.3	25384.6	5447.81	11187.2	11147.8	14673.1	27394.4	5922.22	11614	11769.8	14968.4	29290.9	6188.37	11779.9	11837.8	6507.42	11934.6	12303.5	15910.6	32167	15726.5	29681.5	6652.19	12697.8	11860.3	12824.9	12893.1	16606.4	32358.4	15762.6
1036.75	14662.3	25666.3	5517.74	11174.7	11366.4	15272	27748.1	6028.42	11462.5	11687.3	16562.9	29182.4	6285.23	12147.1	12236.2	6157.92	12037.9	12530.1	18107	29971.3	17838.8	30054	6805.63	13216.1	13056.7	13070.3	12707.9	18640.1	30204.2	19121
1035.8	14352.5	25154.9	5506.25	11059.8	11193.7	15158.5	26690	6047.81	11564.1	11572	15371.4	28648	6296.38	12309	12091.3	6646.09	11917	12716.4	16717.8	30835.5	16325.6	29794.1	6748.68	12531.9	13087.2	12836.5	13794.5	16965.3	32872	16357.8
1034.84	14499.6	25468.1	5494.77	11131.3	11162.8	14583.8	27292.6	6020.32	11232.3	11417.3	15750.3	27562.1	6266.85	12062.9	11820.8	6620.01	11268.6	12139.5	16274.9	29931.9	16904.1	30027.8	6866.85	12219.8	11885.7	11374.4	12977.2	16418.9	30923.5	18085.6
1033.89	14491.7	25576.4	5409.79	11095.2	11310.4	15140	28092.4	5520.79	11503.4	12249.6	15304.9	28532.5	5540.93	11594.9	13427.7	5962.72	12430.4	12709.8	16048.4	29188.8	16261.7	29388.9	5788	12125.4	13890.4	12804.7	12923.3	17123.3	29238.5	16287.5
1032.94	14987.8	25490.5	5513.79	11255.9	11374	15650.8	25521.5	6045.78	11773.7	11967.9	16843.8	28015.8	6292.55	12576.7	12241.9	6632.16	11822.5	12600.3	17264.6	30560.2	16916.1	28418.9	6566.57	12583.5	12742.8	12452.9	13485.1	17421.8	33210.2	17372.7
1031.99	14468.2	25596.1	5502.31	11351	11180.4	14564.6	26619.5	5835.42	11711.9	11311.1	15145.4	27042.8	6213.55	12679.7	11751.9	5897.1	12282.2	11398.4	15330.7	29242.8	15259.9	27324.6	6540.54	12880.7	12770	12551.3	11837.1	15789.4	29374.6	16667.5
1031.03	14709.6	25470.9	5485.59	11194.2	11194.2	15572.7	26832.4	5665.3	12194.6	11661.1	16241.8	28228.8	6162.39	12878.6	12018	5995.74	12432.6	12451.6	17349.6	28710.2	17306.1	28685.1	6550.87	13498	12477.8	12592.9	12718.6	18623.2	30785.3	17622.2
1030.08	14557.4	25159.4	5466.24	11179	11158.1	15570.5	27297	5634.67	11213.4	12042.4	15706.4	29672.7	5782.26	12161.4	12568.3	6119.85	12160.1	12903.1	16197.7	31452.7	16158.5	32631.2	6255.62	13167.2	12979.9	13082.6	13125.3	16920	32346.3	16670.1
1029.13	14486.6	25524.7	5467.89	11009.2	11295.1	14631.9	27003.4	5522.14	11799.2	12202.1	15101.3	28430.6	5602.44	12137.7	12667.9	5944.02	12441	12505	16557.4	28477.4	15124	30717.9	5650.1	12238.3	13887	13657.5	12545.6	17667.4	28532.9	15935.8
1028.17	14665	25226.4	5354.16	10939.1	11091.1	14737.7	27386.9	5846.56	11886.5	12112	14810.9	27671.1	5884.23	12408.3	12474.2	5898.68	12853.2	12681.6	14814	28193.3	15282.5	29373.7	5985.49	12907	13004.9	13982.1	13125.1	16234.8	30268.3	16553.3
1027.22	14827.5	25245.5	5473.8	10845.4	11236	16043.4	26426.5	5995.59	11865.7	11723.9	16661.8	28602.5	6206.89	11971.2	12278.6	6319.62	12417.2	12443.1	17537.6	29309.6	17262.6	30527.5	6338.41	12396.7	12859.1	12465.1	13391.4	18041.9	29447.9	18102.3
1026.27	14329.4	24677.5	5307.69	11026.9	11186.8	15191.4	25737	5465.45	12021.9	12172.4	16141.7	27516.8	5690.06	12173.7	12355	5887.02	12666.3	13079.5	16298.5	28484.9	16383.7	29098.5	5968.95	13310.4	13094.9	12693.7	14010.3	17232.6	30522.3	18015.5
1025.31	14227.3	25359.7	5267.43	10872.9	10872.9	14951.1	27302.1	5465.41	11895.8	11023.7	15385.6	29328.1	5789.24	11978.1	11324.3	6007.44	13003.9	11543.6	15565.9	30082.6	16372.3	30551.3	5789.9	13062.1	11447.2	13754.2	12097.9	16684.4	30703.8	17019.5
1024.36	14457.9	25297.5	5397.49	10857.9	10876.2	15572.4	26825	5669.01	11845.8	11954.5	15801.5	29116.8	5959.27	12205.3	12923.7	6077.41	12893	12836.3	16333.5	30366.8	17281.9	30800.3	6086.51	12720.5	14191	14091.1	14066.1	17173.4	30983.8	18905.3
1023.4	14203.9	24981.2	5351.99	10782.6	10895.2	15130	25106.3	5635.92	11824.3	11220.6	16293.8	27159	5672.97	12300.6	11246.9	5727.4	12622.6	11743.1	16843.7	28708.5	17790.4	28054.6	5811.53	12966.3	11879.6	13837.1	12717.8	18098.5	30712.2	19440.4
1022.45	14217	25097.2	5296.03	10586.8	11053	14385.9	26842.8	5314.17	11182	11325.8	15764	28307.6	5402	11933.6	12162.7	5337.48	11971.4	11803.4	16365.9	30292.1	16324.7	31054	5700.31	12796	12501.4	12474.4	12714.6	16508.4	33030.9	17945.7
1021.49	13973.6	24982.7	5376.26	10666.1	10977.7	14537	25442.5	5859.25	11149.7	11667.5	15800.9	26625.1	6350.57	11433	12641.7	5968.95	11618.5	12700.1	16882.1	29253.6	17113.1	27925.4	6970.67	11770.9	12850	12039.3	13796.9	17619.4	31495.6	17936.1
1020.54	14431.9	25038.5	5333.41	10823.9	10698.2	15307.6	27327.8	5777.91	11734.5	11121.1	16753.7	29772.8	6235.93	12326.4	12038.4	6066.56	12028.6	11348.5	18032.7	29782.5	17402.2	32404.8	6801.37	13279.8	12306.1	12954.5	11866.3	19389.1	31551.4	18028.7
1019.58	14484.3	24701.5	5274.86	10884.8	10994.7	15571.8	25414.1	5529.83	11780.4	11208.8	16769.6	27689.8	5900.43	12247.1	11247	5787.52	12873.5	12127.6	18094.3	30284.4	16893.6	29577.3	6477.71	13218	11637.6	13809	12584.7	19342.9	30728.8	16909
1018.63	14141.4	24820.1	5224.19	10801.7	11042.5	14331.7	26816.8	5501.11	11536.2	11775.2	15513.9	27722.8	5818.19	12178.9	12841.8	5564.27	11789	12766.4	15923.3	28919.8	16992.6	30488.9	6319.46	13077.8	13283	11899.5	13136.4	16574.1	31117.4	17211.4
1017.67	14332.5	24996.2	5348.86	10710.8	10763.1	14664.4	25183.2	5566.76	11522.3	11476.7	14665.8	27034.3	5828.29	11837.9	12550.3	6029.29	11675.9	11800.3	15493.2	29734.1	15274.3	27553.8	6170.8	12272.1	13181.2	12134.5	11810.6	16066.4	30805.7	15670.9
1016.72	14330	24824.3	5285.11	10748.1	10685.3	14676.8	26927.9	5766.77	11691.2	10997.2	15131.2	28028.3	6035.28	12435.4	11287.4	5806.59	12466.7	12006.1	15567.6	28509.5	16504.7	29061.1	6376.07	13187.2	11535.3	13659.9	12831.6	15952.3	29553.2	18124.6
1015.76	14301.2	25115.5	5276.31	10968.6	10806.4	14562.2	27394.5	5313.45	11701.8	11812.1	15706.8	28036.4	5686.9	11824	11962.8	5335.21	12689	12541.2	16751	29806.2	16171.9	28713.6	5805.17	12154.9	12508.9	13810.5	13669.4	17114.9	32619.3	16202.7
1014.81	14623	25016.8	5306.75	10814.9	10835.8	15751.3	26504.1	5781.4	11309.7	11262.5	16889.9	27321.2	6254.12	12142.8	11726.9	5862.34	11584.1	12124.6	17927.3	29499.1	18326.1	29775.1	6711.91	12694.4	12293	12542.9	12921	18399.7	30438.9	19546.2
1013.85	14424.3	25328.7	5135.83	11040.5	10980.3	15523.2	25826.7	5320.17	12056	11144.7	16070.6	26123.5	5531.44	12442.2	11165.4	5436.02	12224.6	11898	17077.6	27734.6	17176.8	27115.9	5659.08	13039.2	11929.8	12981.8	13020.4	18032.9	28510.9	18787.8
1012.9	14500.1	25065.4	5242.1	10923.4	10784.9	15546.1	25385.2	5312.59	11908.4	11794.8	15746.3	26394.3	5610.23	12627.5	12173	5635.83	12316.7	12076.6	16345.1	27077.2	16745.5	27507.7	6004.04	12956.5	12995.1	12571.7	13008.5	16426.9	27384.3	17035.1
1011.94	14390.3	25233.4	5249.01	10984.2	11015.6	14778.5	26282.2	5330.81	11907.1	11918.5	15673.1	26491.3	5739.82	11982.9	12810.6	5345.76	12405.5	11926.2	17108	26755.7	16726.3	28036.9	6130.32	12448.4	12870.4	13071.2	11928.9	18221.9	27297.8	17094.6
1010.98	14348.5	25048.5	5431.02	11037.1	11131.2	14813.8	27518	5584.82	11966.4	12183.1	16209.8	28611.6	5993.15	12763.3	12637.5	6021.58	12201.7	12450.8	16945.3	31219.9	16541.3	31076.7	6559.63	13244.2	13846.7	13413.7	13641.3	17442.7	32760.6	17109.3
1010.03	14586.4	25119.8	5330.74	11178.9	11032.6	14751.2	26543.9	5511.32	11401.1	11513.8	15533.6	28499.9	5697.29	11900.7	12428.8	6047.81	11862	11545.3	16213.7	30717.6	16407.7	30282.7	6033.25	12105	12521.7	11919.3	12059.9	16529.3	33737.7	16780.6
1009.07	14751	25436.7	5376.82	11187.3	11289.2	15315.8	25889.6	5490.77	11923.5	11957.6	15994	27000	5787.67	12676.6	12240.2	5850.79	12393.8	12581.6	16872.3	28778.4	16184.5	29234.5	5879.85	13823.2	12243.7	12862.3	13189.5	16887.1	30467.1	17036.2
1008.11	14628.2	25677.7	5289.65	11133.1	11276.8	15869.8	26544.9	5671.8	11497.2	11659.5	16005.9	26566.7	6054.56	12319.4	12782.8	6140.22	11881.2	12477.6	16305.7	29076	17275.8	26879.4	6327.12	12499	13873.7	12076.5	13208.3	17580	29686.4	18093.8
1007.15	14709.1	25477.2	5293.93	11274.7	11475.8	15634.4	27178.6	5761.23	11751.7	12189.4	16376.8	27721.1	6066.44	11914.4	12648.6	5763.19	11832.3	12319	16567.1	29818.6	17390	28457.2	6274.81	12070.7	12707.7	12889	12348.1	16699.6	32374.9	18864.1
1006.2	14766.5	25334.2	5554.1	11949	11463.3	15111.8	27503	5760.08	12527.9	12570.6	15826.6	29227	6235.71	13478.9	13822	5955.87	13382.4	13826.6	16135.4	31412.4	17301.9	30444.5	6857.76	14073.8	15201.3	14247.1	14550.9	17156.8	33390.8	18610.3
1005.24	15179	26548.9	5790.69	12142.7	12022.6	15768.1	28268.1	6065.24	12194.4	12995.9	16019	28655	6235.09	13383.9	13041.8	6224.65	12864.4	13869.2	17235.5	29441.5	16211.9	30347.7	6504.73	13545.6	13569.1	14149.9	14819.8	18340.3	30403	16359.8
1004.28	15948.9	26786.9	5883.62	12795.7	12323.2	17235	28640.3	5943.32	13597.1	12828.7	17915.2	29949.9	6370.42	14946.9	13794.8	6140.02	14176.9	13204.1	19341.9	30538.4	19013.3	32592	6943.26	16382.2	14608	14409.1	13887.7	20912.9	33209.4	19584.7
1003.32	16037.4	27212.7	6052.2	13208.4	12968.3	17257.5	29045.5	6271.72	14363.3	13886	18833.2	30725.7	6738.52	15552.4	14204.7	6386.8	14523.2	14051.4	19327.7	32402.3	19654.7	31560	7259.2	15911	14374.3	15047.4	14225.4	20259.5	32509	20938.1
1002.37	16060.6	27056.5	6314.66	13213.8	12796.3	16346.9	27342.5	6448.44	13316.1	13492.5	17939.1	29255	7074.49	14619	14036.9	6991.69	13601.2	13493.6	19489.8	29984.2	17948.1	30294.3	7394.76	15130.3	14827.5	14843.9	14646.7	20503.6	32769.6	18979.6
1001.41	15880.4	26686.4	6222.22	13125.4	12804.5	17216.2	26814.8	6840.55	13268.8	13164.4	17462.9	28770.7	7011.87	14188.1	13813.1	7029.82	13344.9	13232.4	18867.4	29487.6	17858.3	30471.3	7515.25	14778.3	14996.2	13762.9	13908.7	19906	31333	17891.3
1000.45	15655.8	26384.3	5858.53	12267.4	12358.7	16348.5	27529.3	6089.61	12955.5	12800.2	16380.6	28337.2	6591.69	14129.6	13163.4	6288.7	14017.1	13267.4	17251.5	29126.7	17992.8	28838.7	7033.13	14406.9	13559.9	15096.4	14353.4	17938	30883.5	18709.2
999.49	15071.4	25884	5695.79	11892.3	11482.9	16292.4	25990.5	5788.73	12001.9	11674.4	16480.8	27838.1	5798.35	13008.2	12320.2	6332.41	12307.3	11896.4	17087	30315.9	16535.9	30482.9	6058.29	13343.9	13300.2	12343.9	12342.4	18151.3	32003.8	17284.6
998.532	14701	25368.3	5423.59	11350.4	11303.5	15666.6	26171.8	5718.98	11708	11653.9	16455.5	27814.3	6164.22	11887.4	11949.4	5862.07	12513.6	12068.6	17648.6	30301.8	17235.2	29785	6330.8	12181	12817.5	13642	12437.5	17927.8	33237.3	18435.5
997.573	14529	25324.6	5313.12	11142.4	11259.7	15425.1	27258.3	5498.79	11341	11821.4	16201.5	27277.5	6036.72	11923.5	12861.4	5930.22	11476.3	11851.9	16848.8	28291.9	17313.1	29689.3	6333.42	13092.2	12878.1	11643.2	12652.1	17696.9	29145.1	18215.9
996.614	14727	25325.3	5335.62	11020.5	10882.4	14770.4	27266.5	5471.17	11888.9	11742.4	16172.8	27889.3	5589.28	12415.4	12443.8	5796.74	12698.2	12023.6	17679.1	29924.1	16188.6	28896.7	5755.2	12684.5	12892.1	13615.3	12054.8	18170.7	31447.4	17263.9
995.654	14581.1	25354.6	5350.3	11156.7	11018.5	14860.8	27403.7	5614.88	11763.7	11793.2	16144.5	28333.3	5772.7	12112.4	12822.8	5814.7	12041.4	12629.1	17142.9	30871.1	17652.2	29285.6	6173.43	12868.6	12877.3	13022.1	13519.5	18699.6	31700.1	18502.6
994.695	14351.8	25014	5362.37	11027	10959.2	14492.8	27012.6	5839.15	11834.8	11887.8	14556.6	28597.3	6202.62	12480.7	12714.5	6068.69	12222.7	12190.3	15452	31082.2	14582.1	30205.2	6627.6	13394.5	13043.6	12470.1	13360.5	16048.3	31374	15509.3
993.735	14448.2	25069.4	5265.02	11009.4	11142.2	15510.1	26303.4	5360.29	11142.7	11920.9	15889.5	26734.8	5653.28	11943.1	12570.4	5890.34	11701.7	12395.1	16412.2	27301.2	17083.3	28819	5914.93	12727	12878	12655.7	12946.6	16490.9	29244.3	18787
992.775	14409.1	25252.4	5415.14	11226.2	11299.1	14824.6	26177.6	5734.24	12079	12271.4	16095	27700.7	6277.33	12391	12410.4	5999.16	13020.6	12520	17609.6	30443.6	17224.6	30291.7	6499.08	12648.4	12742.9	13044.5	13259.8	19286.5	32641.6	17725.1
991.815	14484.7	25188	5333.44	11000.2	11185.1	15082.5	26399.1	5637.31	11800.1	11225.8	16048.7	26705.8	6140.54	12856	11957.6	5826.33	12383.7	12332.1	16388.7	28704.7	16459.2	27147	6750.94	13967.1	12655.9	13177.4	13206.3	17810.2	30058	17248.7
990.855	14531.5	25298.1	5368.94	11196.1	11086.8	15209.8	25558.2	5540.52	12203.6	11383.9	15783.7	26823.4	5959.53	13152.7	12209.2	5662.15	12363.2	12177.7	17353.4	27082.3	16288.9	27357.2	5999.24	13810.2	13382.8	13279.9	13383.6	18872.8	28043.4	16654.8
989.895	14664.3	25231	5534.58	11311.3	11222.8	15645	26675.1	5669.91	11543.4	11431.7	16890.2	28991.7	6052.07	11879.9	11843.1	6129.29	12316.5	11468.5	17958.9	31273.7	17262.4	29864.4	6185.39	12210.6	12550.2	12495.7	11878	18530	32974.5	17885.1
988.934	14437.8	25304.6	5325.36	11121.8	11082.8	15515.7	26244.9	5594.75	11513	11662.5	15536.2	27853.5	5720.31	12193.7	12726.7	6009.53	11977.7	12479.5	15763.8	28076.1	15826	29517.8	5995.4	12847.3	13225.5	12295.3	13565.4	17096.7	28904.3	17242
987.974	14588.8	25339.1	5446.72	11325.4	11096.4	15681.1	25770.4	5479.58	12103.7	11191.2	16336.4	26289.7	5629.78	12466.8	11455.3	5847.77	12215.8	12100.4	17010.9	28259.6	17096.7	27280	6177.56	12789.5	12103.8	12287.5	12436.8	17434.2	31051.8	17900.8
987.013	14552.3	25381.4	5323.45	11219.3	11149.1	14587.3	27435.7	5502.02	12047.6	12134.9	14653.7	28632.1	5553.27	13053.8	12500.2	5975.66	12188.8	13223.8	15219.1	28699.8	15001.6	30055.7	5712.05	13521.7	13116.2	13402.8	14263.7	15661.3	28967.3	16233.8
986.052	14565.3	25116.7	5488.99	11108	11253.7	15455.7	26210	5981.67	11320.8	12366.5	15768	28675.9	6300.03	11435.3	13310.9	6260.49	11779.5	12635.5	16568.1	28794.3	15843.8	31328.9	6595.54	11664.7	14251.6	12870.9	13128.7	17429.1	28921.4	16886.4
985.091	14539.3	25257.8	5532.22	11353.1	11215.3	15560.9	27547.3	5724.89	11873.1	12336.3	17029.4	29645.9	6282.05	12707.9	13290.3	6281.81	12019	13074.5	17516.1	30175	17587.3	30758.6	6695.69	12882.3	14218	12882.9	13844.8	17841.3	32900	18555.4
984.129	14677.1	25190.9	5323.19	11374.5	11104.1	15108.6	25750.6	5387.48	11429.3	11342.1	15668.8	28196.8	5694.99	12336.2	11488.2	5743.28	12360.5	11728.6	16392.1	28485.4	16427.4	30638.6	6097.59	12419.4	12096.8	13046.1	12896.4	16750.4	30853.8	17427
983.168	14773.3	25454.1	5405.43	11159.3	11325.7	15262.6	26051.6	5575.56	12188.5	12130.9	16113.2	28545.5	6045.42	12924.5	12993.5	5716.77	12259.5	12555.2	17568.9	28630.6	16213.9	29459.3	6572.62	13417.6	13149.8	12841.7	13191.9	19024.6	29157.1	16687
982.206	14458.7	25460	5435.65	11188.5	11209.2	14901	25844	5719.34	11703.7	11969.6	15755.6	27513.8	5747.29	11944.7	13066.1	5750.86	12382.3	12650.5	16396.9	30000.9	16638.8	28068.7	5747.93	12137.7	13377.8	12511.4	13516	16859.7	31831.7	16898.2
981.244	14690	25289.1	5549.04	11399.6	11152.7	15805.2	26442	5770.14	12118.8	11535.9	16065.8	28226	5928.92	12240.6	12067.4	6026.5	12253.4	11558.5	17547.5	30679.9	16625.7	30818.1	5938.06	12505.3	12881.5	12779.9	12306.3	17815.5	31942.6	16753.2
980.282	14476.9	25066.2	5438.9	11348.1	11431.3	15022.2	25554.6	5553.73	11566	11902.9	16000.7	26366.7	5794.04	12655.9	12280.1	5596.83	12714.3	12457.4	16659.1	26648.4	17304.7	27516.1	6184.49	13036.9	13130.9	12942.8	13204.6	17085.3	28029.9	18938.8
979.32	14521	25495.6	5396.35	11250	11179.8	14797.4	27634.1	5655.08	11390.1	11798.6	16027.1	28232.7	6149.13	12395.2	12401.4	5716.68	11648.7	12167.2	17206.7	31054.4	16937.4	29912.6	6185.62	12545.1	12521.7	12642.6	12541.7	18026.4	33108.8	17744.3
978.357	14380.8	25304	5481.1	11237.6	11364.8	15791.7	25798.5	5606.75	11961.7	12271.4	16531.4	26436.5	5719.05	12840.4	13154.1	5927.38	12300.8	12764.2	16959.6	28918.6	17266.3	27256.7	6287.13	13380.3	14147.7	12750.8	13350	17008.5	30112.3	17342.2
977.395	14850.9	25491.6	5519.08	11453.7	11269.3	16171.9	27043.1	5786.28	12299.5	11663.6	16965	27990.4	5791.37	13182	12795.1	6101.57	13096.3	12532.1	17682.3	30326.5	17549.6	30332.9	5834.17	14471	13301	14273	13778.4	18238	31988.9	18322.4
976.432	14700.2	25258.6	5351.89	11459.4	11430.9	15328.7	25655.5	5655.22	12251.2	12462.7	15929.2	26935.7	5896.98	12723.3	12888.9	6080.48	13213.3	13660.7	16676.1	28057.9	16533.2	27566	5916.89	13293.7	13420.6	13219.5	14152.1	17465.1	28678.9	17461.1
975.469	14601.5	25347.5	5337.95	11465.2	11106.9	15169.7	26122.6	5834.5	11807	11549.2	16219.9	27013.7	6279.57	11885.3	12107.3	5965.79	12675.7	11756.7	16661.8	28971.3	16661.9	27715.6	6504.66	11923.8	12312.5	13868.1	12048.2	17796.8	30857.1	18228
974.506	14741.6	25480.5	5500.53	11325.5	11281.4	15484	26204.7	5848.19	11360	12066.4	16356	27430.9	5960.26	12215.1	12650.8	6074.63	12000.7	13143.1	17826.4	28428.8	16782.6	29964.9	6210.38	12727.7	13136.8	13110	13228.2	19603.5	30241	17376.5
973.543	14604	25291.7	5442.44	11590.8	11398.8	15895.6	25398.3	5845.9	12046.9	12052.8	16544	25759.1	6381.15	12285.5	12418.9	6073.06	13182.2	12160.3	16688.8	27652.8	17599.7	27696.1	6934.59	12506.5	12453.5	13253.7	13185.9	17713	28305.7	17801.4
972.579	14858.3	25502.5	5472.6	11407.1	11316.3	16194.3	25891.7	6001.63	12273.1	12160.9	17051	28052.2	6151.68	12600	13124.7	6455.18	12450.3	13321.4	18732.6	29202.4	18241.6	30324.7	6181.38	13595.4	13774.8	12703	14379.2	19045.1	30844.2	20000.6
971.616	14710.3	25324.1	5484.59	11303.9	11366.1	15904	26683.9	5976.44	12154.8	11908	16748.3	27122.5	6219.79	13339.7	12965.3	6412.24	13331.7	12482.7	17226.9	29518.1	17813.9	28928.3	6417.27	13881.3	13226.9	13428	13496.2	18393.7	31166.7	18747.5
970.652	14731	25137.9	5473.23	11231.8	11338.1	14915.4	26633.9	5591.58	11829.9	11872.6	15844	27602.8	5598.65	12464.8	12720.7	6145.05	12624.4	12902.6	17385.3	29422.2	16503.8	30046.2	6032.22	12921.4	13533.9	12651.1	13892.7	18562	31372.6	17387
969.688	14881.4	25491.3	5360.73	11528	11196.1	15547	27900.8	5736.81	12466.7	12126.6	15937.9	30386.4	6239.81	12561.9	12976.9	5771.51	13379.3	12562.6	16300.5	33215.3	16445	31488.6	6270.52	13130.9	13374.5	14558.3	13393	17882.9	34407.7	17003.1
968.724	14813.9	25351.9	5533.49	11414.5	11393.7	15029	26399.1	5853.29	12548.8	12058.5	15152.1	27238.8	6214.6	13475.9	13262.4	6157.47	13635.5	12538.4	15992.9	28561.5	16626.1	27737.1	6797.92	14369.7	14076.5	13874.7	12661.4	16499.1	29146.4	18038.3
967.76	14417.2	25492.5	5516.94	11482.4	11205	14428.6	27051.8	5936.77	12096.8	11626.1	14985.9	27743.3	6346.73	12297.6	12011	6434.95	12832.7	12664.9	15907.3	29655.3	14986	29360.8	6653.17	13076.5	12908.9	13289.8	13796.9	17255	30366	16464
966.795	14321.3	25296.1	5521.14	11262.6	11363.7	15535.9	27560.4	5906.56	11897.9	11416.9	15774.8	29614.6	6474.91	12956.7	11834.8	5969.57	12758.8	12117.9	16377.5	30096.8	16677.2	31347.4	6879.99	13717	12277.8	13157.3	13285.2	17427.1	32315.9	17867.7
965.831	14570.1	25133.5	5548.65	11377.2	11366.8	15429.6	27541.4	6055.03	11419	11625.5	15495.4	29329.8	6616.91	12445.4	12738.9	6435.59	11721	12074.1	17017.7	29677.3	16392.3	30901.3	6999.65	13410.4	13676.6	12873.8	12907.1	17941.9	31236.8	17101.9
964.866	14870.6	25766.4	5594.29	11395.9	11268.9	16102.5	26698.2	5759.53	12212.9	12183.2	16272.3	28368.1	5897.43	13071.3	12929.4	5995.64	12716	12785.4	17002.7	29614.5	17510.2	29833.5	6378.32	13255.8	13533.2	13700.6	13214.6	18186.4	31419.4	17724
963.901	14697	25564.9	5435.26	11541.5	11339.4	15246.6	27082	5740.89	11991.8	12142.1	15723.7	29273.8	6098.1	12079	13262.5	6038.65	12385.6	12517.7	16508.6	29532.3	17282.2	29967.2	6104.99	12355.2	13377.5	13134.8	12946	17716	31813.6	18041.7
962.936	14836.8	25487.7	5576.74	11371.1	11311.5	15625.1	25935.8	5703.38	11399.2	11418.6	16468.8	26376.5	6131.66	11770.5	11658.8	6159.63	12274.2	12081.1	17688.6	28767.7	16576.6	26684.7	6531.16	12003.7	12630.9	13016.2	12162.7	19197.6	29308.6	17013.1
961.97	14518.2	25449.5	5340.07	11545.1	11501.1	14697.7	26639.8	5719.73	12237.2	12320.2	16060.2	27068.5	6183.93	13377.9	12827.8	5861.6	12618.5	12535.2	17176.1	28982	17617.8	27236.7	6297.99	13807	12917.1	13495.6	13738.6	17215.9	29015.9	18901.4
961.005	14777.1	25727.1	5556.61	11545.6	11369.6	16215.4	27717.3	5841.54	12546.9	11563.5	16554.2	30023.8	5916.1	13668.5	12162.9	6292.18	13682.9	11565.4	18087.2	31160	16738.2	32533.2	6105.73	13697	12964.8	14854.2	12360.2	18356.8	33650.8	18411.9
960.039	14802.9	25497.3	5449.47	11398.6	11264	14828	25834.4	5625.97	12271.8	11531.2	16090.5	27839.4	5816	13083.6	11979.1	6041.48	12942.8	11964.9	17686.9	29871.9	16939.8	28990.6	6047.77	13163.2	13146.4	13596.2	13003.3	18572.5	30522.8	17920.9
959.073	14466.3	25930.1	5583.08	11585.5	11318.9	15041.9	27575.9	5805.72	12440	12320.1	15147.8	27675.8	6159.98	13667.7	12693.6	6115.4	12485.7	13207.6	16129.5	28246.6	15248.3	28281.9	6551.98	14171.5	13333	13694.9	13816.3	16711.6	29557.9	15908.9
958.107	14536.2	25384.6	5579.49	11598.9	11412.6	15852.3	26872.9	6063.14	12590.7	12487.5	16430	29218.7	6255.71	12687.9	13351.5	6621.58	13749.2	12972.3	17385.8	31984.7	17258.2	29818.6	6263.77	13599.7	14422.8	15046	12976.9	18679.4	32581.8	17403.9
957.141	14694	25532.7	5625.06	11563.2	11239.8	15994.7	27148.7	5903.87	11798.7	12207.1	16585	27352.4	5907.96	11857.8	12880.5	6049.07	12758.2	12958.5	18167.5	29250.1	16896.1	29190.6	5918.83	11999.5	14053.5	13123.7	13121.4	19662.1	31518.5	18287.9
956.175	14569.7	25533.3	5525.74	11473.2	11157.5	15964.9	27739.4	5830.49	11698.7	11601.1	15993.3	28670	6318.62	12013.1	12053.1	6159.56	11805.5	12756.6	17036.5	29294.7	16120.9	29300.4	6637.87	13175.7	12343.7	12907.4	13561.4	18672.9	32053.8	17566
955.208	14701.6	25627	5545.44	11497	11349.5	14923.1	27166.7	5944.38	11724.3	11357	15341.3	29420.8	6316.85	12121.6	12114.8	6396.14	12321.9	12013.7	16271.7	30487.6	15697.6	32186.4	6762.22	12644.3	12409.7	13113.3	12785.6	17459.6	30780.1	16663.9
954.241	14763.6	25123.2	5448.76	11461.3	11324.2	15227.6	26885.8	5986.59	12558.7	11588.4	15658.4	29528.4	6309.55	13149	12482.3	6339.07	13323.9	12331.6	16442.4	31177.1	15802.6	32020.7	6580.01	13521.7	12518.2	13708.8	12850.3	16883.7	32552.4	16307.5
953.274	14691.2	25173	5419.34	11516.1	11454	15004.9	25617.1	5784.16	12427.9	11978.2	16083.4	26418.5	5828.69	13038.9	12079.4	6174.59	12561.9	12206.3	17538.6	26800	17550.2	27876	6372.46	13282.2	12477.6	13036.2	12421	19093.7	28991.1	17616.8
952.307	14440.3	24964.3	5426.12	11214.1	11457.1	14946.7	26678	5833.34	11970.6	11639.1	15573.6	28866	6403.11	12875.4	12185	5873.11	12322	12676.4	15913.8	29681.3	16656.3	31351.4	6424.27	12945.9	13100.7	12614	13659.9	16200.5	29960.1	18091.3
951.34	14396.4	25344.9	5471.66	11196.6	11387.9	14784.5	25421.4	5620.58	11873.7	11938.5	15515.6	26111.4	5680.19	12726.6	12749.4	5921.37	12690.3	12903.8	16852.7	28112.2	16569.9	28436.5	5739.14	13562.3	13545.3	13701.8	13926.2	17304.6	30022.6	16619.6
950.373	14543.7	25498	5462.92	11295.4	11238.5	14904.2	26957.6	5579.34	11597.8	12247.4	15677.3	27875.9	6030.78	12257.4	13149.7	5765.46	11812.7	12492.3	16130	29843.5	16461.9	30180.2	6087.6	12432	14433.8	12704.1	12504.7	16481.4	32609.7	17171.5
949.405	14386	25359	5327.59	11231.3	11164.2	14744.3	25855.1	5397.85	12055.7	12213.4	15519.3	27329.9	5604.3	12757	13133.2	5827.64	12195.3	12985.6	16651.5	29150.1	16829.5	27673.1	6148.72	12843.1	14203.1	12349.8	13640.5	17765.8	31052.8	17728.3
948.437	14522.9	25357	5450.62	11162.2	11172.5	14849.8	26917.7	5782.72	11764.7	11614.7	15449.9	27269.9	6123.84	12406.4	11959.5	5976.2	12576.2	12381.8	16219.4	28543.4	15567.9	28671.3	6484.63	12502.7	12148.4	13539.6	13103	17336.8	30160.3	16211.8
947.469	14634	25613.3	5423.82	11377.1	10992.3	15979.7	27079.2	5566.08	11839.3	11655.2	16064.5	29071.8	5862.48	12109.6	12081	5619.94	12829.7	11845.5	16739.6	29149.7	16641.4	31005.2	6236.74	12389.7	12347.5	13007.4	13000.6	17130.7	29239.4	18168.9
946.501	14396.3	25360.8	5391.85	11349.2	11134.9	14460.3	26753.9	5503.49	11651.8	11315.2	15066	27032.8	5517.08	11852.1	11321	6028.88	12248.4	11741.3	15117.8	29212.1	16109.4	28055.1	5699.4	12317.5	11609	12826.4	11834.9	16321.6	29379.7	17294.9
945.533	14752.6	25444	5597.43	11274.9	11331.7	15319.9	26011.1	5701.3	11402.7	11606.5	15671.6	26332.7	5799.44	11613.4	12195.6	6083.64	12038.8	12654.7	16373	28713.3	17153.1	26853.7	6000.89	12348.5	13333.7	12450.6	12887.5	17159.5	30085.1	18204.8
944.564	14509.9	25093.5	5405.4	11128.3	11278	15482.9	26105.4	5420.46	11674.3	12009.7	16013.7	26469.6	5833.63	11873.8	12740.4	5807.12	11813.9	12693.7	16744.8	26627.6	17591	28970.4	6240.34	12028.2	12856.9	12419.4	13944.4	18371.1	27966.8	18113.8
943.596	14543.4	25522.6	5443.14	11407.6	11165	15827.9	26773.9	5497.44	12116	12159.4	16497	28982.5	5588.79	12308.9	13323.8	5873.59	12851.6	12603.5	17680.3	29450.1	17759.3	30908.2	6058.17	13144.9	14629.5	13927	13273.1	18542.3	29472.9	17846.9
942.627	14755	25138.7	5511.83	11299.8	11057.2	14768.3	26692.1	6014.55	11734.4	11324.2	15823.3	29194.6	6418.46	12252.7	11390.2	6279.49	12839.6	11974.5	16579	29800.9	16122.1	29298.3	6746.95	13065.2	12212.5	13216.3	12698.7	17441.2	31319.7	17453
941.658	14494.3	25363.8	5456.66	11114.6	11341.6	15154.6	27324.1	5473.59	11907.7	12242.4	16098.1	28047.9	5648.87	12099.2	13100.4	5676.93	12924.2	12919.2	16659.5	30210.8	16173.1	30255	5937.36	12491.5	13911.9	14078.9	13126.6	18295.2	31057.4	16869.9
940.689	14705.8	25312.8	5360.23	11277.6	11373.1	16083.4	25519.6	5424.14	11296.5	11425.6	16552	26446.2	5590.11	12054.3	12421.3	5887.54	12380.2	12357.7	17837.8	29089.7	17865.3	28714.2	6125.27	12984.1	12573.2	12944.5	13336.1	18690	31715.4	19617
939.719	14636.1	25243.7	5490.8	11404.6	11066.7	15072.9	26777.7	5942.8	11609.9	11541.1	15198.4	29318.4	6456.9	12705.9	12545.7	5977.16	11935.8	11704.4	15787.3	31192.6	15451.9	30566.1	6711.55	13524.5	13006.7	12302.2	11918.2	16597.8	32353.5	15620.9
938.75	14721.1	25262.4	5585.21	11544.3	11260.7	16055.6	27615.8	5964.32	12077.1	11269.2	16104.5	27949.5	6557.5	12638.3	12081.5	6284.5	13202.4	11871.3	17587.9	28536.1	16159.4	29672.1	7120.62	12729.3	13117	13616.3	12871.5	18915.6	31360.1	17578.5
937.78	14587	25080	5527.49	11418.5	11155.5	14750.7	26242.5	6043.04	12005	11866.5	15293.8	26802.4	6422.37	12963.4	11982	6091.18	12168.3	12316.7	16281.3	29237.3	15617.6	28029	6617.1	13323.8	12887.4	12520.3	12318.9	17869	31301.9	16749.9
936.81	14731.3	25147.6	5580.62	11413.9	11153.5	16018.8	26776.8	6015.18	11518.6	11655.3	17428.2	27530.5	6135.02	11895.9	12323.8	6502	11733.1	12310.4	19037.9	28077.2	19068.9	28059.5	6194.97	12913.5	13028.6	12332.2	13463.7	20076.9	28848.8	19320.2
935.84	14306	25001.3	5491.99	11208.2	11275.2	15127.1	26527.5	5530.23	11750.5	12211.5	16049	29054.5	5662.84	11922.7	12941.2	5563.5	11943.3	12700	16391.7	29632.2	17073.6	30142.8	5874.02	13084.5	13030.1	13104.7	13533.5	16623.3	32451.7	17366.1
934.87	14553.4	25244.2	5385.36	11293.8	11347.9	15183.6	26468.1	5505.87	12063.3	11879.8	15953	27526.5	5546.6	13014.1	12073.9	5836.97	12936.7	12402.4	16449.2	28271	16138.4	30050.3	6046.54	13200.1	12455.6	13731	13528.9	17925.6	30283.7	16376.1
933.9	14718.2	25164.9	5654.9	11157.8	11139.8	14826.4	26738.1	5925.09	11924	11339.4	15810.5	27418.9	6258.11	11990	12388.8	6353.48	11959.9	12197.7	16295.5	28362.4	16408	27620.3	6318.85	12228.4	13482.9	12865.3	12553.8	17497.3	28998.6	16478.4
932.929	14354.9	25309.8	5398.87	11379.9	10998.7	14734.4	27168.8	5728.27	12265.9	11221.4	15181.5	29118.2	6136.63	12911.1	12083.2	5939.41	13086.7	11777	15370.6	30122.1	16599.6	31215.8	6632.61	13050.2	13016.1	13462.4	12048.3	16906.6	31251	17307.8
931.958	14697.4	25294.9	5426.23	11117.7	11004.4	15013.6	25719.2	5468.49	11724.2	11091.3	15924	27715	5762.56	12767.6	12080.6	5564.82	12536.1	11427.1	16218.6	28713.4	17126.9	29757.9	6274.24	13415.2	12825.4	12751.6	12286.6	16505.7	30794.3	17371.6
930.987	14633	25128.1	5394.35	11118.3	11128.6	16011.7	25270.4	5424.52	11783.2	11782.6	16969.5	26839.1	5966.33	12030.6	12719.8	5885.9	12008	12055.8	18563.6	27023.7	18651.4	28061.3	5993.26	12856.5	13415.6	12544.8	13028.9	19122.4	28538.5	19068
930.016	14357.5	25061.8	5359.91	11409.8	11275.9	14993.3	25860.7	5471.03	12421.1	11638	15411.7	27070	5858.97	13525.3	12614.5	5712.56	12863.6	12592.7	15896.3	27374.2	15768.9	28150	6372.34	13668.9	13144.5	13433.4	13742.3	16856.7	28306.4	16908.6
929.045	14401.2	24949.2	5382.11	11374.2	10975.3	15771.3	25507.3	5729.68	12362.8	11941.6	16183.7	27557.5	5821.95	13134.2	12215.7	6180.97	12629.5	12681.4	16526.6	29557.6	16823.4	28133.5	5895.98	14382.4	12549.4	12976.2	13741.1	16650.1	32457.1	17925.1
928.073	14509.3	25104.3	5440.33	11261.5	10932.1	15005.5	25601.4	5689.86	11456.4	11947	15362.1	27038	5827.14	11783.7	13055.6	6133.89	12354.4	12693.3	16164.5	28322	15611.9	28871.8	5845.02	11783.9	14283.5	12696.4	13551.5	16523.8	30867	16238.3
927.102	14287.9	25002	5418.76	11164.3	11009.9	14756.5	25659.1	5823.31	11821.5	11462.4	15964.6	27021.3	5886.57	12252.8	12601.4	6397.26	12014.4	12038.7	17418.7	29083.8	16279.7	27893.9	6283.78	13450.4	13002.1	12759.4	12766.1	18163.6	31206	17343.2
926.13	14370.3	25234.1	5458.95	11092.8	11043.9	15153.6	26357.6	5790.05	11692.1	11805.2	15539.6	27766	6355.37	12821.6	12264.7	6044.02	11903.8	12465.3	15765.7	29967.3	16050.8	28538.8	6538.76	13167.6	12288.3	12776.2	13085.1	16485.5	32059.9	16220.4
925.158	14249.3	24702.3	5303.64	11142.3	11216.9	15199	26005.7	5593.33	11795.4	11673.2	16222.5	28332.2	5816.25	12710.3	11723.3	5988.35	12278.3	12027.7	17280.7	29271.7	17832.1	30369.8	6290.92	13975.9	12571.3	13200.1	12047.8	17292.4	31220	18248
924.186	14475.6	24937	5418.4	11202	11104.3	15060.6	25542.2	5605.07	12268	11694.9	15309.1	27980.2	5876.12	13438.4	12362.9	6085.81	13173.8	12689.8	15457.3	28070.1	15796.3	30089.5	6384.28	13441.3	12805.9	13805.7	13362.2	16052.8	30457.3	17249.8
923.214	14257.1	25153.6	5643.69	11002	10986.5	15105.8	27116.9	6016.74	11020.4	11542.8	15448.5	27336.1	6332.28	11884.5	12176	6509.46	11515.3	11916.3	16015.5	29383.1	15794.2	29073.8	6726.8	12752.1	13141.1	12289.9	11982.1	16205.4	29481.8	16417.3
922.241	14267.3	24982	5334.19	11120.8	11074.5	15400.6	25605.1	5617.68	11808.8	11934	16418.8	26287.2	5921.42	12467	12641.1	6049.12	12335.4	12619.1	17684.5	27788.3	16433.2	27292.7	6335.04	12729.4	12817.5	12935.9	13649.5	18552.7	29118.4	18044.4
921.268	14231.4	25273.1	5374.35	11010.9	11093.1	15449.5	27672.6	5432.74	12094.2	11350.9	15805.1	28044	5654.65	12228.3	12187.4	5576.68	13063.4	12187.1	16025.4	28129.5	16671.1	30290.3	5772.81	13421.8	12337.7	13222.7	12819.8	16462.3	30282.3	18169.2
920.296	14434.4	24877.9	5396.51	11068	11014	15100	26536.6	5599.34	12075.6	11590.5	15559.2	28711.9	5920.95	13080.8	12734.4	5983.99	12669.1	11638	16069.6	28861.1	15922.6	30011.6	6374.02	13301.3	13187.3	13718.6	12121	16455.2	29949.6	16766.4
919.323	14501.1	24924.8	5421.22	11014.6	10888.7	15226.5	26912.1	5566.44	11736.7	11950.3	16582.9	26975	6051.59	12163.9	12393.6	6050.42	11826.7	12803.5	16598.5	29654.7	17333	28026.9	6566.82	12916.4	13188.2	13001.7	13599.3	16781.5	29766.1	18319.9
918.349	14416.3	24673.7	5376.58	10958.7	10889.3	15092.4	25840.9	5876.39	11633	11797.9	16296.2	26012.4	5883.61	12029.4	12581.5	5941.48	11655.6	12557.6	17725.4	28386.5	17684.1	27971.7	6035.35	12419.8	12880.9	12058.7	13368	19041.2	30622.6	19154.7
917.376	14411.1	24926.1	5334.51	11041.4	10954.1	15344.2	27331.3	5638.16	11557.7	11724.4	16741.3	29628.5	6028.02	11909.4	11908.3	5847.62	12004	11762.3	18374.1	30380.6	17689.9	30882.2	6326.66	12847.1	12128.4	12014.9	12308.1	18380.6	33048.5	19174.3
916.402	14367.5	24906.2	5397.75	11067.7	11065.1	14962.1	26132.5	5601.27	11334.5	11174.6	15700.7	27761.2	5836.02	11429.1	12024	5863.46	11545.2	11396.6	16271.4	28232.9	16604.9	28162.1	6168.34	12110.7	12436.3	12076	11925	16685.6	30891.1	17917.4
915.429	14321.2	24737.3	5494.34	10957.9	10857.7	15125.8	25932.5	5809.77	11033	11350.4	15770	28418.8	6111.57	11652	11485	6015.4	11940.5	11893.7	16849.1	29887.1	16550.2	28563.4	6138.97	12011.4	12187.2	12528	12364	17118.9	30573.5	17703.9
914.455	14559.9	24822.7	5385.53	11048.3	11012.4	15095.5	26109.1	5537.17	11100.9	11232.5	15172.9	28576.8	5965.69	11250.3	11811.6	5893.46	11792.3	11667.4	15253.1	30263.6	16090.4	30814.4	6369.94	12179.4	12379.8	12676.5	11846.3	15706.9	31709.3	17269.5
913.481	14439.2	24736.1	5438.45	10810.2	10869.2	15000	26286.1	5741.54	11404.8	11533.1	16332.1	28226.9	6167.59	11947.5	12413	6219.7	11466	12181.1	17298.6	29839.4	16905.5	30429.2	6194.56	12664.9	13454.3	12457.1	12324.9	17827.2	30894.5	17694
912.506	14126.1	24793.2	5262.98	10957.1	10731.2	14550	26167.2	5350.85	11624	11215.3	15863.6	27157.7	5776.32	12481.1	11305.8	5607.39	11852.1	12002.7	16116.6	28698.4	15877.3	27402.4	6175.23	13016.1	11728	12509.6	12480.5	17363.1	30828.1	16851.2
911.532	14321.1	24637.4	5513.46	11088.5	10819.1	15535.2	26156.1	5525.72	11866.4	11055.7	15703.5	27001.3	5617.53	12652.1	11966.3	6016.2	12457.1	11520.4	16377.9	29580.8	15709.7	27777.6	5769.67	13561	12278.9	12489.3	12384.3	17045	31413	16830.1
910.557	14121	24784.3	5471.42	10853.1	10942.8	14926.3	26153.4	5704.06	10902.7	11012.3	16021.6	26166.8	5877.92	11045.6	11307.6	5747.89	11261.2	11367.7	16589	28123.2	16042.9	26692.5	6177.85	11437.9	12007.4	11766.9	11870.5	17246.5	30644.8	16558.3
909.583	14110.8	24800.3	5439.66	10925.5	10802.4	14454.5	25155.5	5951.98	11206.2	11132.3	15868.2	25371.7	6510.07	11876.6	12037.7	6109.57	11943.5	11184.3	15964.9	26723.5	16462.8	27050.5	6981.42	12429	12218.6	12641.9	11339.1	16255.5	26965.9	16583.1
908.608	14369.8	24759.9	5413.03	10992.7	10818.4	15602.8	25203.4	5579.43	11167.1	11232.5	17051.7	26506.3	5849.72	12036.7	12196.8	5829.22	11495.4	12219.7	17271.4	27492.1	18122.4	27376.8	5942.89	12651.9	12728.7	12054.9	12479	17960.9	29825.9	18305.8
907.633	14262.1	24737.5	5286.43	11152.3	10788.2	15471.4	25614.6	5305.01	11221.8	11667.5	16738.5	26293.3	5695.36	12148.3	12616.6	5810	11423.2	11822.9	17831	26361	17628.8	28080.8	6204.01	12202.5	13226.7	11599.6	12496	19526.3	26612.9	17970.6
906.657	14480	24684.4	5321.36	10947.8	10886.2	15413.3	24887	5595.61	11244	11915.2	16930.1	25182.4	5727.28	11861.5	12002.6	5684.54	12073.8	11928.8	18469.5	25842.4	16930.6	26008.3	5849.48	12534.7	12051	12974.9	12716.8	19019.6	26212.2	16964.5
905.682	14287.7	24646.6	5463.92	10889.4	10727.9	14954.1	24682.6	5722.39	11621.5	11215.4	15323.2	26056.9	6026.15	12284.6	12188.1	6007.8	11739.4	12209.5	15973.1	26919.3	16854.9	26330.3	6167.34	12301.8	12618.3	12518.8	12336	16095.3	27546.6	17605.3
904.706	14239	24683.1	5480.87	10782.4	10979.7	14377.3	25934.3	5629.75	11706.6	11031.3	15371.9	28069.1	5944.39	12655.3	11627.8	5888.74	12735.9	11322	16369.1	29363.2	16289.5	29765.7	5962.71	12933.8	12129.8	13284.6	12065.7	17291.6	29831.4	17727.4
903.73	14351.7	24996.3	5336.41	10934.1	10959.8	15325.8	26230.2	5529.26	11060.2	11862.3	15799.8	27885.4	6030.31	11329.3	12116.1	5624.85	12100.7	12138.9	16726.2	29350.4	16935.5	30141.4	6380.9	11672.2	12549.6	12355.4	12162.6	17580.9	31027.1	17584.9
902.754	14351.7	24776.7	5501.94	10852.8	10932.2	14675	25403.4	5580.95	11755.8	11827.8	14880.6	27333.6	5789.88	12279	12250.8	5961.31	12154.5	12163.8	15574	27645.6	15735.4	29258.5	6137.84	13453.3	13099.4	12800.4	12943.6	16627.2	29875.7	15745.9
901.778	14221	24997.6	5477.9	11114.6	10930.2	14833.4	25580.8	6009.56	12113.7	11626.9	15620.5	28131.4	6093.03	12683.4	11701.8	6497.01	13240.7	12305.1	15998.1	28410.5	15975.8	29459.1	6144.64	13241.5	12109.6	13811.8	12573.3	16333.9	30040.6	17155.1
900.802	14198	24916.2	5469.23	11015.3	10943.6	14828.3	25438	5714.07	11166.1	11842	15339.4	26666.3	6185.44	11391.1	12044.7	6150.47	11468.7	12707	16787.8	27579.6	15341	28014.3	6607.34	11626.3	12462.9	12291.6	13292.3	17905.8	29714.9	16496.2
899.825	14336.2	24742.8	5550.16	11125.9	10777.8	14469.2	24961.6	6073.03	11814.6	10937.3	15245.1	26694.9	6404.89	12224.4	11029.9	6411.2	11853.1	12011.4	16693.7	29025.2	15883.4	29297.7	6735.65	12715.4	11221	11876	13064.7	17426.2	29246.4	16752.6
898.848	14285	24717.8	5536.36	11162.3	10850	15524	26056.7	5767.43	11288	11606.1	15870.7	27997.2	5799.83	12034.8	12645.8	6290.68	12352.3	11751.9	16489.6	28371.3	16562.7	28005.9	5936.72	12928.7	13830.4	13425.2	12251.4	17573.2	30489.9	17035.5
897.871	14487.1	24925.7	5514.89	10917.2	10779	14699.4	26662.5	5732.21	10969.4	11565.7	14980.6	26743.1	5740.66	11148.4	11604.1	5773.97	11778.2	11806.3	15392.7	27244.5	16074.9	27391.8	5780.53	11827	11642.5	11826.3	12936.3	15501	27705.3	17065.9
896.894	14517.8	24951.9	5432.01	11222.2	10976.6	15202.9	25697.4	5922.88	12274.9	10978.9	15631.3	26809.7	6319.91	12681.2	11277.6	5993.9	13062.9	11563.4	17165.9	27653.3	16375	27882.9	6787.89	13682.5	11333.2	13411	12055.3	18404.8	28542.6	17136.5
895.917	14192.8	24645.6	5379.87	10910.7	11076.9	15605.2	26453.3	5752.13	11458.3	11191.3	17081.1	27005.4	6174	11807.9	12176.5	5861.06	12408.9	11350.4	17236.5	28035.1	17277.4	28483.7	6397.33	12419.1	12184.4	13300.7	11997.3	18761.9	30589.9	17473.6
894.94	14279.8	24960.8	5450.51	11184.9	11028.9	14697.1	26686.3	5820.58	11894.4	11329.3	16107.7	26840.7	5878.67	11997	11442.7	6235.2	11912.3	11984.4	17275.6	27135.7	16678.5	27433.7	6299.89	12184.2	12206.9	13027.9	13049.8	18504.6	29720.8	17973.4
893.962	14287.4	24802.9	5452.08	11055	10922.1	15675.9	26561.7	5730.33	11744.8	11746.4	16284.1	27697	5824.69	12360.9	11788.4	5851.36	12639.6	12005.7	16435.5	29113.4	16524.8	29057.6	6169.91	13003.9	12644.6	12649.5	12870.5	16783.6	31650.8	17793.4
892.984	14535.4	24708.9	5448.54	11047.9	11040.3	15411.7	26460.3	5655.53	11070.9	11757	16649.3	29101	6160.99	11934	12036.2	6115.75	12108.3	12138.9	18024.4	29272.9	18232.3	30322.7	6756.87	12463.5	13176.9	13043.9	12507.6	18626.8	29700.3	18877
892.006	14333.4	25024	5539.58	11056.2	11189.1	15118.1	25883.7	5897.57	11828.2	11438.8	15718.1	27749.9	6031.79	12250.7	12085.7	6469.68	12709.1	12148.3	15871.7	28377.1	15923	29161.8	6424.37	12498.8	12647.7	13781.6	12637.4	17182.6	29498.6	16799
891.028	14550.6	24431.6	5643.37	11110.4	11112.9	15213.6	25768.4	6088.03	11124.5	11318.2	16593.9	27472.7	6099.6	11503.3	11503.2	6317.25	11972.3	12348.5	17138.8	28255.9	17981.8	28857.7	6542.3	12406.3	12323.9	12024	13328.4	18451.3	30733.9	19635.8
890.05	14489.2	24641.8	5522.25	11003.6	10949.9	15843	26909.8	5701.85	11305.2	11046.1	16464.5	26973.4	5766.78	12156.7	11992.1	5754.24	11676.7	11910.6	17495.3	27781.9	16836.9	29351.1	5956.44	12533.9	12505.4	12227	12750.5	17564.8	29547.2	17025
889.071	14708.8	24714	5449.71	11200.9	10983.7	15323.9	25470.3	5873.7	11388.9	11395.1	16111.7	27510.1	6309.39	12006.1	12433.2	5955.28	12366.4	12247.4	16171.5	29404.8	17709	29777.4	6671.69	12891.6	13219.7	12585.5	12762.8	17435	29750.3	18729.1
888.093	14307.7	25046.8	5548.35	11352.1	11101.8	14628	25465.9	5704.02	11751.7	11682.8	14907.8	25548.5	6082.15	12910.2	12666.6	5894.95	12226.6	11741	16190.4	26559.5	15444	28083.8	6536.59	13500.1	13820.3	12744	12149.7	16493.3	28695.2	16101.8
887.114	14399.6	24889	5626.52	11051.3	11002.7	14660.3	25011.1	6096.33	11193.4	11064	15022.7	26559.4	6245.04	11951.3	11106.4	6336.75	11548.2	11739.5	15936.4	27419.2	15712.8	27820.6	6266.81	12344.5	12081.1	12619.1	11986.8	16889.7	27636.4	17159.3
886.135	14197.8	25068.3	5303.75	11011	10878.2	14832.5	26289.5	5334.41	11652.3	11823.2	15602	27087.7	5586.65	11826.6	12094	5424.8	12167.7	12421.3	15926.1	27327.1	16351.9	28071	6046.02	12536.1	12951.5	12764.2	12634.6	16175.9	27898.8	16680.7
885.156	14389.3	24987.2	5517.25	11088.1	10988.6	15014.5	27343.2	5811.74	11303.3	11081.9	15695.8	27415.8	6159.16	12057.6	11636.8	6356.57	12235.1	11777.6	15863.1	27917.2	16611.2	29254.3	6641.06	12507.3	12451.2	12259.5	12290.8	16515.7	27982	16932.9
884.176	14427.5	25026.1	5498.39	11058	10989.1	15019.5	27297.6	5845.6	11862.5	11903.4	16371.7	29503.4	6024.39	12675.1	12984.4	6165.78	12671.3	11923.6	16868	31682.4	17351.6	30747.2	6460.9	13081.4	13343.3	13334.4	12941.4	17107.1	34094.8	18072.8
883.197	14565.3	24646.4	5471.87	10964.2	11160.7	14572.8	26890.5	5555.08	11226.4	11626.8	15876.4	27140.9	5556.6	11419.2	12695.8	5823.04	12279.7	12115.4	16571	27759.1	15917	29838.1	5780.64	12386.7	12926.7	13441.1	13117.3	17146.8	29175.2	16451.8
882.217	14381.5	24769.5	5437.71	11094.9	11163.8	14685.6	25276.1	5513.23	12039.1	11736.6	14718	27795.9	5778.89	12671.7	12191.3	5774.61	13053.4	12806.4	14889.6	29996.1	15524.9	28761.4	6164.38	13262.9	12579.5	14302.1	13209	15127.9	32297.2	16861
881.237	14424.8	24604.3	5645.93	11131.1	11098	15462.7	25906.7	5911.96	11225.4	12179.3	15465	28449	6364.7	12171.8	12864.7	6067.44	11554.2	12298.9	16711	29160.1	16359.8	29816.3	6910.02	12211.6	13529.5	11767.6	13442.5	17580.2	29541	16897.6
880.257	14544.6	24829.4	5586.24	11126.6	10894.4	15644.5	24838.6	5927.02	11544.5	11977.2	15853.3	27078.1	6428.36	12120.6	12911.7	6375.57	12358.2	12310.7	16754.8	27283.7	16108.5	28841	6467.88	12580.9	13524.2	12405.8	12769.3	18165.5	28384.7	16814.4
879.277	14167.1	24654.1	5495.96	11221.5	11060.8	15298.5	25264.2	6020.58	11924.7	12034	16358.1	26552.1	6034.64	12231.4	12484.7	6439.91	12892.9	12436.3	17727.8	28394.8	17721.8	28628.3	6370.35	13433	13580	12969.5	13645.4	18817.5	31187.1	18163.7
878.296	14348.1	24953	5609.71	11206.7	11120	14481.1	27267.5	5670.11	12055.9	12035.6	15781.8	27448.2	5673.3	13017	13110.7	6116.05	13197.3	12571.1	16893.2	27655.7	16764.7	29822.8	5725.96	13308.1	13881.6	13233.1	12883.9	17091.3	28452.5	16811.5
877.316	14297.1	24604.3	5557.71	11395.9	10886	15202.3	24887	6086.57	11527.5	11494.1	15623.3	25029.6	6343	11566	11785.1	6536.82	12591.7	12640.2	16243	27380	16392.5	25769.3	6840.06	12143.9	12853.5	13775.6	13000.4	17771.8	27967.5	17662.6
876.335	14337.8	24969.5	5668.86	11281.6	11217.9	14458.4	25808.5	6090.18	11414.9	11340.8	15117.6	27687.5	6334.07	11529.9	11391.1	6112.31	11845.6	12118.1	16490.8	30070.8	16450.2	30399.1	6464.65	12595.7	12494	12169	12215.6	16571.2	32845.2	17045.6
875.354	14294.5	24835	5667.83	11052.8	10999.3	14660.8	26246.6	6049.09	11652.2	11378	15799.9	28223.4	6067.05	12107.8	11525.1	6611.25	11941.5	12085.6	16463.5	30619.8	17239.4	29236.7	6355.56	12740.2	12594.2	12070.3	12262.3	17915.5	31898.7	17477.4
874.373	14444.7	24534.9	5781.47	11275	10971.8	15595.1	25671.6	6170.18	11286.5	11717.3	16102	27932	6443.79	12224	12350.5	6302.44	11363.7	12785.6	16242.1	30333.7	17167.8	30437.2	6671.37	13085.6	13158.6	12202.6	13973.6	16658.8	30854.2	18655.8
873.391	14495.6	24991.6	5482.35	11041.1	11115	14981.2	26290	5600.96	11423.6	11799.6	15321.5	28407.9	5898.67	11823.8	12966	5921.86	12349.1	12827.6	15360.3	29587.4	16349.2	28571.1	6472.31	12165	13602.6	13263.6	13721	16424.7	31066.8	17030.9
872.41	14426.8	24750.2	5509.38	11069.7	11097.7	15755.3	24844.6	5807.01	12140.2	12130	16448.9	26246.3	5924.74	12694.1	12819.1	6342.35	12834.4	12287	17993.5	27085.3	17834.2	27484.8	6490.01	13171	13447.2	13067.1	12337.6	18824.6	27947.8	18420.9
871.428	14452.2	24995.3	5551.67	11256.1	11055	14694	26324.6	5575.01	11562.8	11506.9	14978.9	27385.2	5940.79	12344.8	12565	5577.85	12224.1	11959.2	15449.8	29275.4	16040.9	29883.9	6146.46	12413.4	13622.7	12485.1	12972.4	16869.1	31571.7	17630.1
870.446	14436.8	24743.8	5558.31	11159.9	11083.5	15864.5	26858.7	5676.05	12229.7	11318.6	17224.2	26993.8	5909.27	12425.2	11349.5	5943.27	12935	11807.3	18354.5	27981.1	17835.9	29143.8	6492.72	12796.9	12099.4	13251	12206.5	20101.6	30072.6	18752.5
869.464	14345.1	24808	5544.57	11257.2	10875.3	15761.7	26543.7	5547.47	12043.6	11534.5	15971.8	28599.4	5915.01	12218.9	12598.5	6019.52	12689.2	11632.2	15995.8	29784	16212.4	31283.4	6367.95	13089.8	13841.7	13362.9	11753.3	16645	29870.8	17585.3
868.482	14436.7	24691.5	5627.56	10924.2	11021	15459.3	24865.1	6035.19	11257.4	11480.2	15625.4	26762.1	6184.38	12180.2	11630.7	6043.92	11565.8	12285.9	15884.8	29357.4	17086.7	28422.8	6484.67	13276.7	12715.2	12535.8	12923.8	16470.6	32138.1	18289.9
867.5	14777.6	25455.6	6008.26	11550.8	11339.6	15342.9	26181.8	6447.26	12385.5	12403.9	16698.1	27665.6	6571.86	13123.1	12426.7	6866.58	12991.4	12582.2	16754.2	29477.6	17318.8	28392.2	6985.12	13621	13268.6	14128	13030.5	17458.8	31551.8	17847.5
866.517	14866.5	25769	6343.02	11759.9	11693.8	16178.4	26156.7	6411.96	12332.1	12773.8	16318.8	27828.6	7036.58	13356.3	13368.7	6741.05	12839.1	14041.4	16740.8	30009.9	17032.7	29393	7669.35	13688.6	13778.2	13701.5	14472	17583.6	31153.2	18348.6
865.534	15128.4	25395.5	6173.98	11696.7	11874.8	16440.3	27730	6566.76	12841.3	13029.9	16490.4	29695.5	6612.38	13282.6	13288.7	6743.39	13224.6	14245.8	17089.9	31454.1	16958.8	30929.8	7002.74	14163.6	14146.2	13291.4	14705.1	17930.4	32942.8	17490.5
864.551	14627.2	25223	6101.65	11369.1	11447.9	14699.5	27243	6439.74	11558.9	11850.9	15256.3	29243.2	6919.53	11939.4	12144	6805.37	11875.8	12795	15592.4	29415.9	16603.1	31094.9	6956.33	12379.2	12646.1	12416.9	13594.8	16599.6	31396.5	16966.6
863.568	14520.3	24900.6	5825.9	11275.4	11186.4	15080.7	26945.5	6146.8	11701.6	11861.4	15280.6	28988.3	6698.45	12276.8	12111.7	6253.43	12660.1	12282.5	15434.8	31697.7	16521.9	29201.9	7196.14	13333.8	12114.2	12902	13226.1	15557.2	32713.9	17436.9
862.585	14578.6	24929.1	5730.77	11064.9	11057.3	15054.5	25454.1	5838.07	11950	11624.7	15065.9	27351.1	6364.89	12528.1	12471.9	6273.8	12889.2	12518.7	15987.4	28650.8	15793.1	28981.9	6702.7	13474.6	13107	13360.1	13252.4	16910.2	31252.7	17101.4
861.602	14487	24822.9	5757.7	11248.5	11083.2	15700.1	26848.3	6330.85	11781.3	11493.6	15896.3	27604.9	6725.26	12769.6	12491.6	6571.96	12924.4	12616.4	16242.4	29518.3	17149.8	29564.1	6802.94	13497.8	13313.2	13637.4	13614	17789.1	30955	18326.8
860.618	14471.7	24721.8	5530.45	11228.7	11170.2	15382.8	24846.3	5709.18	11590.6	11355.1	16761.6	25415.3	5923.58	12081	11395.5	6059.81	12221.4	12370.8	17948.2	27690	17059.6	27855.9	6056.17	12656.9	11900	12632.3	13576	19223.9	29607.5	17425.1
859.634	14616.5	24902.9	5669.21	11361.3	11079.2	15301.7	25390	5779.42	11490.5	11588.6	15617.4	26632.3	5865.69	12627.4	12517.6	6293.64	11555.3	12367.9	16464.6	27755.7	16758	28949.7	6062.45	12891.1	13767.7	11621.7	13153.8	17842.9	29105	17939.4
858.65	14608.7	25022.8	5675.81	11316	11229.7	15490.1	26721.3	5715.36	12292.9	11259.2	15888.9	28045.3	5808.94	13452.5	11766.8	6178.46	12409.2	12260.2	17052.7	29216.8	16773.5	30002	6337.16	14095.9	11788.3	12846.5	12425.7	17704.3	31307.2	18424.5
857.666	14562.9	25076.7	5839.89	11176.8	11189.5	15051.1	27339.8	6063.8	11412.9	11310.5	15349.9	29777	6079.84	11749.7	11803.2	6484.25	12171.1	11450	16747.4	32105.1	15587.4	32610	6621.46	11870.3	12649	12405.3	11971.8	17118.5	33395.2	16877.1
856.682	14710.1	24747.1	5904.86	11659.9	11174.8	15169.6	26909.8	6067.89	12124.2	12189.8	16133.5	27645.4	6281.15	13270.1	12873.9	6351.56	12730.5	12198	17082.7	28540.9	16828.3	29626.9	6482.53	14299.3	13771.2	13201.2	12467	17936.5	29479.8	18432
855.697	14687.1	25044.8	5814.92	11548.6	11309.9	15115.7	26539.6	6123.11	11566.8	11686	15742.6	28411.3	6487.23	12084	12743.6	6317.73	11855.2	12608.7	16090.7	30551.6	16303.8	29281.6	6648.6	12934.8	13792.3	12141.9	13054.5	16502.8	31225.2	16314.7
854.712	14763.2	25322	5920.49	11328.2	11401.8	15750.9	27738.3	6335.27	11612.5	12342.6	16094.7	29155.4	6743.8	12188.1	13043	6859.07	11953.5	12919.3	16178.7	29980	16286.6	29925.2	7062.33	12621.9	13252.1	12928.1	13278.9	17071.9	32725.5	16755.1
853.727	14879.8	25208.3	5927.04	11341.3	11440.3	16209.5	27682	5990.89	11470.7	12395.8	17634.7	29758.2	6296.8	11714.7	12742.6	6039.99	12191.3	13083.9	18602.3	32353.9	19356.1	31100.5	6692.46	12822.5	13583.3	13043.3	13563.1	19423.8	33093.8	20767.4
852.742	14757.8	25089.5	5953.88	11542.3	11402.7	15478.9	27067.5	6520.96	11869.2	12340.5	16360	29163.2	7083.09	11972.4	13013.9	7090.57	12581.4	13244.8	16895.5	32024.3	16484.4	31625.4	7711.39	13034.6	13199.7	13168.6	14426.9	17028.6	34213.3	17688.4
851.757	14909.9	25239.8	6031.46	11410.8	11418.4	15085.1	26246	6033.4	11447.9	11936.1	15130.2	28120.4	6105.67	12279.5	12752.8	6240.06	11655.6	12312.2	16397	29887.9	16595.9	29377	6249.46	13363.3	12923.4	11842.1	13162.6	16495	31901.7	16820.1
850.772	15059.4	25121	5994.85	11725.8	11363.1	16106.2	26225.6	6245.78	12175.8	12034.3	16667.8	28710.3	6676.11	12663	12302.5	6773.7	13272.5	12583	17299.8	30862.7	17401.1	31284.3	6842.96	13580.4	13380.8	13411.8	12814.1	18089.8	31144.2	18022.2
849.786	14658.5	25327	6029.27	11614.7	11361	15160.7	27171.2	6585.43	12505.1	12176.3	15246.7	29693.1	6709.01	12715.9	12876.8	6682.69	13453.1	12696.2	16132	31675.8	15954.8	30270.2	6992.62	13059.2	13186.1	13512.2	13700.8	16485.9	32898.9	16494.5
848.8	14769.9	25119.5	6020.57	11501	11447.7	16246.9	25553.5	6112.56	12309.8	11669.6	17118	26806.4	6191.29	12875.7	12104.1	6563.46	12651.3	12501.9	17648.8	27973.2	17326.2	27707	6552.11	12999.2	12249.5	13393.9	13126.2	17949	29954.8	17817.8
847.814	14668.4	24978	6027.08	11263.1	11349.3	15984.6	25515.3	6300.69	11475.2	12102.2	16806.9	27143	6610.83	12421.6	12508.4	6441.59	12562.9	13214.4	17996	28536.7	17338.9	29829.7	6723.15	13473.2	12762.8	13246.1	13899.6	19703.1	30522.1	18596.8
846.828	14688.5	24813.8	5977.82	11438.5	11385.2	14914.6	26307.5	6561.88	12484.1	11661.8	16327.1	28089	6717.32	13237.4	12254.2	7167.82	13347.9	12231.6	17328.9	30084.9	17330.1	28522.7	6824.86	13904.9	12764	14354.8	12677.9	18300.8	31726.6	18237.1
845.842	14612.3	24786.5	6100.94	11461.7	11269.1	14825.9	25100.6	6698.35	11953.7	12344.1	15437	25619.7	6877.26	12301	12785.7	6720.27	12700.4	13473.1	16414.7	27123.5	16532.4	26371.1	7035.12	13367.6	13989.3	13710.3	13781.7	17480.3	29787.6	17483
844.855	14878.3	24979.6	6031.41	11398.8	11472.3	14902.6	25460	6425.32	12417.7	12261.4	15170.7	26334.1	6694.3	12477.7	12586	7042.28	13617.7	13133.3	16447.7	27571.8	16223.7	28827.8	7187.06	13506.5	13289.2	14775.5	13784.5	16646.6	29483.6	16482
843.869	14971.9	25243.7	6395.17	11650.2	11564	15754.3	25344.9	6951.26	12024.4	11862.4	16755.2	26484.3	7527.66	12207.4	11996.8	7120.25	13068.2	12777.4	17756.2	26876.7	16989.6	28089.3	8079.75	12456.4	13077.5	13094.7	14041.8	18780	28172.9	17074
842.882	15103.4	25310	6467.47	11754.4	11734.2	15200.5	25353.8	6999.29	12619.8	11875.9	16296.2	27205.4	7111.3	13577	12215.8	7120.88	13383.5	12120.5	16722.1	28617.4	16612	27822.8	7790.1	13800.7	13067.6	13649.6	13045.3	17835.6	29389.4	17773
841.895	14915.8	25057.2	6400.45	11466.1	11643.4	15030	25659.2	6625.09	11468.6	11697.3	16464.8	27118	6698.79	11833.8	12083.9	7150.78	11650.6	12584.7	17143.8	29578.5	17104.5	28808.6	7214.88	12298.2	13003.1	12066.3	13829.9	17566	31865.7	18272.6
840.907	14872.6	24989.4	6290.39	11256.4	11269	15566.7	25047.5	6886.59	12311.8	11724.8	16445	25665.1	7565.81	12663.9	12511	7549.37	13278	12734.9	17984.8	26650.6	16881.9	25945.6	8261.97	12732.2	12562.1	14601.8	13896.8	18037.4	26932.8	17048.5
839.92	14578.7	24946.9	6106.95	11307.5	11297.4	15406.7	25208.9	6227.06	11789.3	12207.9	15660.4	25847.3	6708.59	12667	12576.8	6589.66	12449.5	13247.7	16464.9	26218	16810.8	26311.4	7351.01	12870	13018.6	12861.3	13413.2	17846.6	28466.3	17347.8
838.933	14636.8	24818.3	6250.14	11419.4	11573.8	15802.5	24832.8	6524.1	11692.4	12454.3	16386	27280.3	6630.71	11801.8	13576	6804.61	11787.2	13684.4	18020.9	29714.6	17043.8	29386.2	7273.33	12649.4	13832.5	12081.9	15041.4	19705.5	31837.6	17175.8
837.945	14763.2	24866.9	6221.16	11429.9	11308.4	15359.7	27192.6	6258.44	11701.5	11626.3	16867.9	27492.4	6855.91	12109.4	12234.7	6523.34	12736.5	12744.2	18157.7	28394.2	18037.5	28918.8	7492.35	13170.9	12461.4	13718	13884.1	19130	28999.7	18324.9
836.957	14750.4	24682.8	6090.98	11225.4	11372.2	15719.6	26396.4	6443.28	11768.6	11403.1	16915.7	26883.9	6569.62	12407.4	12486.5	6898.64	12014.5	12094.4	16996.1	27777.4	18395.9	27134.1	6580.6	12640.7	13404.9	13009.3	13037.7	17768.8	29187.4	19284
835.969	14750.3	24837.7	6241.67	11390.4	11188	16131	24999.1	6835.76	12199.1	12128.3	16144.5	26809.3	7352.78	13238.5	12681	7294.31	12779.1	12988.7	17427.3	29116.3	16304.6	27783.9	7936.55	14409.1	12792.3	13990.4	14145.6	17817.2	30146.9	16900.2
834.98	14722.3	24873.6	6351.84	11459.1	11373.1	15236.9	26741.8	6560.96	11483.4	12457.8	15464.8	28093.6	6785.54	11873.5	13058	6616.62	11766	13346.8	15863.8	29882.9	16271.8	30363.6	7109.97	12471	13223.8	11882.1	14523.6	17326.3	31856.8	17239.5
833.992	14896.7	24661.7	6418.98	11747.9	11330.6	15913	26011.6	6953.14	11916.7	12157.9	16624.3	27379.2	7532.52	12109.8	12421.5	7501.12	11917.5	13084.2	17275.4	28544.1	18070	27512.3	7702.76	12292.6	12832.3	12482.6	13609.9	17844.7	29748.6	19055.8
833.003	14699.3	25393.1	6263.56	11462.5	11401.9	14779.7	26602	6380.78	11608.8	11826	15122.6	28167.1	6559.87	12082.6	12598	6827.33	12479.8	12265.2	16472.1	30426.3	16173.4	30613	6559.91	12619.8	13757.4	13666.3	12597.2	16757.7	33069.4	16847.9
832.014	14916.6	25133.1	6411.59	11614.7	11442.8	15165.5	26786.2	6976.6	11647.6	11663.4	15282	27956.7	7324.61	12650.5	11959.6	7599.24	11986.7	12637	15710	28855.3	15676.3	29564.8	7847.44	12798.6	12892.9	12469	13380.7	16719.7	30969.4	15820.7
831.025	14918.9	25050.2	6455.92	11415.4	11658.1	15626.2	25296.1	6911.35	11948	12129.4	16025.5	26905.5	7367.83	12536.1	13047.8	7548.81	12526	13169.6	17316.7	29574.6	17158.2	27954.8	7747.65	13423	13615.8	13247.9	13940.8	17923.6	30687.8	17969.3
830.036	14863.1	24979.9	6351.13	11683.8	11577.6	15232.8	27350.5	6967.05	11727.6	11846.8	16069.2	27970.8	7134.15	12736	12042.5	7311.46	12217.3	12085.1	16287.8	29297.9	16590	29436.6	7842.75	12864.8	12587.4	12895.1	13055.7	17546.5	31541.4	16712.8
829.047	14880.6	25212.9	6390.41	11727.1	11641.2	15007.3	26092	6888	12009.4	12542.7	15425.6	28020.7	7320.46	13203.1	12858.8	7040.66	13027.1	13306.9	16546.8	30523.5	15629.2	29341.4	7606.06	13583.6	13531.2	13979.9	14456.3	17616.9	31061.8	16356.1
828.057	14991.6	25036.6	6300.82	11821	11869	15259.3	26246.4	6404.01	11838.8	12929.4	15334.2	27907.1	6704.72	12170.9	13962.9	6930.44	12575.3	14180.1	15918.9	28912.8	15960.5	30177	7323.13	12652	14565.8	13306.1	15255.7	16172.6	31302.8	17172.5
827.068	14756.5	25221.4	6352.72	11793.6	11634.5	16128.4	27171.7	6717.05	12892	11779.5	17577.8	28726.4	7108.39	12957.8	12746.1	6893.24	13111.5	12588.5	17856.2	30125.1	17819.9	30497.7	7780.16	13082.6	12747.8	14083.7	12784.8	19522.2	32789.9	17978.7
826.078	15061.9	25328	6306.11	11513.6	11485.9	15580.6	26043.4	6506.29	12612.6	12045.3	16880.1	27852.1	6602.36	13169	12870.9	6890.6	13568.5	12160.5	18535.9	28738.7	17922.1	29676.4	6660.19	13775.7	12892.2	13591	12321.2	18685.7	29196.7	19516.5
825.088	15162.7	24982.5	6484.24	11587.3	11660.5	16034.8	27058.6	6844.16	11630.8	12099.4	16803.7	28492.2	6912.8	12771.6	12428.3	6972.13	12126.5	12324.7	17456.7	29695.7	17476.8	30500	7319.45	12816.5	13509.3	12947.8	12465.6	17736.6	30059.1	17894.7
824.097	14879.7	25018.4	6303.82	11825	11585.2	15269.1	26228.7	6478.31	12632.7	12130.6	16670.4	27474.1	6836.08	12984.8	12342.9	6928.93	13181.7	12865.8	17406.9	29150.6	16975.2	28665.2	7437.7	13181.2	12821.9	13714.2	13946.3	18552.5	31597.6	17470
823.107	14983	25210.7	6451.59	11565.4	11658.8	15013.6	26727.7	6583.51	12637.9	11823	16423.6	28836.1	6649.04	13587.2	12049	6656.85	13356.8	12647.3	17663.5	31087.1	17535.2	29614.5	6665.75	13998.8	12791.5	14599.8	12774.8	17802.3	34193.3	18898.3
822.116	15051	24928.5	6498.37	11752.6	11565.8	16502	27132.4	7022.91	12883.4	12513.6	17771.2	28686.2	7449.14	13091	13150.4	7263.02	13067.6	12880.3	19234.2	30039.2	19459.3	30263.2	7590.33	13410.2	13828.5	13841	13818.2	20369.9	30624.4	20174.4
821.125	15118.9	25146	6494.67	11722.7	11553.6	15689.1	25463.9	6723.83	12340.4	12400	16748.8	27397.1	7210.48	13191.6	13012.1	7131.85	12991.3	13236.8	16886.9	27593.7	16877.4	29892.3	7499.41	13279.7	14081.3	13511	14075.8	17685.7	27790.6	16998.5
820.134	15010.2	24952.2	6344.65	11634.8	11594.4	15940.5	27161.3	6775.28	11883.4	12153.2	16928	27591.4	7094.56	12793.5	12580.2	7243.08	12032.3	12805.5	17246.9	28137.9	17911.2	29908.8	7212.02	13101.7	13304.2	12080	12859	18479.5	29335	18298.2
819.143	15065.5	24930	6646.16	11451.1	11531.8	16238.3	25387.4	6969.16	11873	12537.8	16556.7	26295	7543.77	13020.6	13311.6	7364.28	11980.9	12588	17437.1	27441.8	17603.2	26310.6	7832.08	14042.6	14553.9	12770.3	13130.2	18597.9	29902.9	18710.6
818.152	14941.7	24938.1	6549.13	11771.8	11570	16013.7	26199	6676.94	12111.9	12685.3	17012.3	27659.8	7318.2	12469	13349.1	6733.39	12380.3	13853.5	17685.1	28156.7	17563.3	27678.7	7489.89	13636.5	13661.2	12868.7	14742.9	18080.2	29790.2	19037.2
817.16	14807.9	24915.9	6492.47	11641.1	11406.6	14929.3	26555.1	6893.59	11816.8	11975.3	14951.9	29189.4	6971.75	12912.8	12558.6	7326.19	12439	13164.7	16145.5	31998.5	15131.5	31908.6	7024.39	13474.9	13346.6	12612.4	13418.4	16395.4	33113.6	15159.8
816.169	14979.1	25022.3	6526.58	11666.7	11399.5	15090.3	27211	6726.36	12012.5	12345.3	16235.6	28422.5	6831.64	12971.6	12692.2	7195.71	12429.4	12679.2	17061.5	29654.3	16864.1	29531.6	6867.3	13168.5	13521.6	12673.4	12736.3	18181.3	30979.9	17815.5
815.177	15193.1	24748.1	6515.31	11659.5	11379.7	15421.1	25132.2	6966.87	12397.4	12369.8	15518.1	27427.2	6982.35	12958.1	12861.9	7150.2	13298.6	12660.1	16336.5	29416.7	16294.3	28032.5	7547.62	14226.2	13732.6	13740.6	12992.2	17819.1	30806.5	17207
814.185	14905.6	24731	6534.28	11533.9	11677.5	16353.2	26975.1	6950.83	12276	12296	16445.2	28802.9	7581.95	12773.2	12607.5	7356.56	12984.4	12482.5	16448.4	31167.3	18028.8	30396.9	7716.26	13435.3	13412.2	13977.1	13244.6	17223.7	33667.6	18364.5
813.192	15054.1	24739.1	6512.94	11788.8	11549.4	15734.8	25924.9	6785.4	12533.8	12129.1	16349	27554.9	7391.47	12885.6	13299.3	6909.94	13002.8	12256.8	17839.5	29897.8	17938.6	29006.7	7975.92	13945.8	14326.4	13988	12945.7	19575.9	32809.1	17956.8
812.2	15006	24961.3	6632.67	11494.4	11360.9	15594.9	26309.4	7080.92	12590.3	11393.4	16144.6	27976.9	7664.76	13185.7	11591.2	7464.12	13655.9	11990.9	17738.6	29903.3	16171.8	28954.1	7945.97	14124.4	11642.2	14222.6	12046.9	18516.4	30144.7	17391.5
811.207	15267.7	24843.4	6538.27	11567.9	11671.2	15646.9	26027.9	6668.12	12619.7	11820.9	16786.1	26439.9	6984.64	13218.9	12618.5	7215.27	13849.9	12389.5	16821.6	26729.5	17921.7	26496.7	7036.48	14198.6	12790.8	15208.9	13004.7	18199.2	27719.2	19164.8
810.215	14998	25133.5	6688.17	11633.8	11588.5	15640.4	27480.3	6736.12	11795.2	11771.2	15775	28027.4	6858.6	12079.3	12458.3	7276.06	12755.9	12439.9	16962.3	28448.4	17177.2	29931.8	7276.43	12079.3	12876	13786.5	12848.2	17989.1	30659.6	18336.8
809.222	15219.4	24902.4	6659.26	11558.7	11523.4	15772.8	24987.6	6683.76	12101.1	11853.6	15996	25309.7	6825.15	12479.5	12279.8	6757.02	12759	12125.2	17257.2	25701.8	16531.6	26422	7347.99	13359.4	13338.9	13840.4	12955.7	17537.8	27062.3	17873.7
808.228	15163.7	24953.2	6567.43	11609.4	11521.3	15897.8	26303.2	6631.98	12087.6	11924.3	16446.8	27139.9	6776.17	12894.8	12525.8	6662.65	12556.1	12937.8	16462.9	29052.7	17755.1	27213.4	7315.98	13053.1	13750.1	13800.2	12958.7	17490	29174.9	18679.3
807.235	14952.1	24832.9	6656.84	11476.4	11433.7	15318.5	25036.8	6986.98	12025.2	12325.7	16141.7	25938.5	7030.42	13009.3	12396.6	7685.18	12533.7	13527.8	17575.2	28457.1	16436	26097.9	7198.76	13178.5	13485.8	12775.2	14107.8	18602.5	29075.9	17131.2
806.242	14994.7	24926.5	6461.87	11492	11524.7	16130.2	26547	6882.01	11887.8	12253.1	16599.8	29069.5	7120.54	12966.5	12861.3	7273.84	12364.2	13202.5	17584.9	29151.7	18097.9	30954	7788.67	13159	13107.7	12408.1	13717.5	18584	31492.8	18923.8
805.248	14815.8	25002.5	6596.55	11615.7	11323.8	15779.5	25658.2	7253.92	12189.9	11814.3	16700.2	26407.2	7818.1	12774.6	11827.8	7939.41	13250.5	12126.6	17476.5	27538.4	17745.2	28174.7	8502.05	12850.4	12970.1	13417.7	12369.9	18674.1	30027.1	18569
804.254	15026.9	24811.8	6831.8	11306.7	11465.1	15886.6	26722.2	7114.91	11730.5	12251.5	16571	28659.4	7232.07	12697	12434.9	7418.35	12706.3	13217.1	17783.3	29046.8	16906.3	31084.1	7822.09	12798.4	13401	13559.3	14458.4	18272.6	31848.8	17916.3
803.26	14973.9	24840	6453.31	11520.9	11417.8	16055.4	25064.8	6784.67	12433.7	12309.4	17537.6	25775.9	7250.55	12828	12486	7053.93	12672.1	12492.2	17918.3	26790.6	17900.8	28179.2	7850.44	14089.6	13355.2	13873.1	13419.6	19430.7	27432.7	18037.8
802.266	15195	24782.7	6580.38	11455.9	11455.9	15731.1	25383.1	6808.24	11482.1	12445.4	16601.5	26686.9	7188.54	11965.9	12447.9	7215.96	12447.1	12851	16623.1	28633.9	18096.6	28841.8	7767.16	13055.8	13116.5	13396.6	13717.7	17636.2	28977.9	19617.1
801.271	14807.6	24924	6699.85	11287.9	11250.2	15642.9	26990.3	6917.33	11938.9	11697.5	16276.8	29442.3	7468.51	12509.5	11812.2	7291.2	12395.5	12519.9	17179.4	31905	17460.1	29867.2	7716.83	13452.8	12867.9	12477.6	13657.4	17526.6	33698.4	18048.6
800.277	14905.4	24472	6419.63	11542.3	11326.1	16063.6	26646.8	6657.66	11649	11508.5	17057.1	26826	7320.74	11855.8	12069	7171.14	12709.6	12413.8	17274.3	28834.2	17536.4	28151.7	8050.83	12835.6	12892.9	13895.4	13178.9	17985.5	28900.3	18008.1
799.282	14998.2	24691.2	6501.39	11180.8	11306.4	15103.1	27053	6795.77	11445.4	11791.8	15593.3	29744.2	7437.01	12162.7	12014.5	6933.76	12190.5	12574.9	15919.5	32654.7	16786.5	29843.8	7723.48	13082.3	12274.6	13368.5	13660.3	17281.9	34327.6	17640.2
798.287	14985.4	24518.4	6625.84	11286.8	11397.3	15207	24986.2	6963.09	12007.9	11893.9	16278.6	26278.1	7077.56	12113.4	12962.8	7495.69	12352.9	12088.9	17769.3	27861.7	17630.8	27658.6	7201.63	12494.7	14042.2	13101.8	12196.3	19216.9	28514.8	18150.8
797.292	14754.1	24697.3	6446.27	11430.4	11284.7	15020.8	25762	6924.75	12279.8	11467.9	15655.7	26350.7	6968.88	12784.4	12553.3	7079.78	13056.2	12254.5	16147.6	26951.8	16207.5	27472.7	7056.37	13142.5	13189.3	14062.3	12534.9	16745.5	29368	16380.7
796.296	15047.8	24893.7	6570.68	11496.2	11388.2	16094.1	27118.5	7074.31	11534.5	11579.4	16610.1	27831.8	7125.53	11658.2	12001.1	7160.47	12282	11642.5	18054.7	30439.4	17723.4	27979.9	7675.55	12295.4	12839.8	13383.1	12349.7	19846.6	32045.1	18003.4
795.301	15117.8	24535.1	6504.19	11333.4	11318.3	15426	24831.9	6725.87	11442.1	11874.2	15788.3	26297.8	7040.7	11884.9	12845.5	7201.15	12357.8	12834	16159.4	27210.2	16920	26474.5	7374.66	12349.1	13821.8	12489.2	13988.1	17143.4	28142.8	18099.1
794.305	15137.7	24528.1	6698.85	11248.4	11384	15717.9	24668.8	7293.25	12101.7	12330.4	16766.9	26930	7411.69	13297.1	13340.2	7647.72	12346.9	12557.2	16933.6	28038.5	17920.3	29112.3	7953.47	13967.7	14489.7	12468	12960.4	17865.9	28105.8	18300.1
793.309	15155	24674.3	6592.19	11359.4	11374.4	16443.5	24940.1	6824.26	11691.3	12397.2	17763.8	26530.9	7244.69	12408.9	13516.6	6890.5	12171.5	13137.8	18412.6	28568.9	19442.8	26965.8	7552.44	12489.7	14630.3	12623.1	13462.7	18546.9	29423.8	19501.1
792.313	15300.3	24940.9	6488.09	11322.2	11528	16794.2	26582.2	6993.09	11921.7	11952.1	17871	28298.6	7221.23	12159.8	12207.1	7683.91	12092.3	12089.5	18375	29571.9	19390.6	29492	7493.22	13055.6	13422.9	13103.1	12802.7	18731.5	29894	20152.7
791.317	14993.9	24725.5	6660.06	11322.6	11375.3	15256.7	26372.5	7290.12	11341.1	12449.7	15972.5	28566.1	7459.43	12093.8	12992.3	7763.35	12021.6	13454.6	16452.4	30002.2	16978.6	30912.4	8165.25	12665.3	13194	12500.7	14406.2	17625.7	31300.6	17902.6
790.321	15161.8	24803.8	6571.03	11491.1	11418.4	16506.3	27112.3	6616.34	11498.4	12185.5	17124.8	29480.8	7154.42	11787.7	12341.1	6959.42	12410.6	12294.2	18053.8	30091.1	18298.3	32379.4	7609.84	11997.6	13500.3	13541.2	13172	18681.7	33008.6	19347.2
789.324	14988.4	24545.9	6783.06	11448.9	11589.4	16269.7	25859.8	7110.8	11527.9	12375.1	17035	28173.8	7684.91	11741.9	12420	7765.67	12027.5	13529.2	17839.9	29935.7	18709.2	30881.3	7859.96	12584.3	13071.2	12524.8	14413	19392	32325.9	19377
788.327	15196.4	24589.1	6681.5	11489.5	11619.9	16386.9	25729.2	7299.87	11899.7	12506.3	17590.1	28117.8	7566.37	12082.2	13733.8	7758.26	12172.6	13615.8	19002.2	29932.4	17873.2	28917.5	8265.04	12805.2	13819.9	12709	13694.1	20024.5	31785.5	18980.9
787.33	15374.2	24930.7	6685.3	11482.4	11492.4	15610.8	26026.9	7247.41	11560.5	11955.4	15875.3	27691.1	7482.31	12374.3	13015.4	7662.35	12151.1	12698.2	16787.5	28720.2	17151.2	30121.4	8104.98	12747.1	14316.8	12192.9	13135.1	17813.9	29734	17999.5
786.333	15100.6	24740.6	6653.99	11673.3	11455.2	15779.5	26914.1	6972.97	12008.5	11940.2	17032.6	27712.3	7639.29	12682.3	12278.9	7435.63	13096.1	12770.5	17944.7	29731.3	17313.1	28213.9	7762.59	13811.7	12755.7	14057.9	13974.6	19575.1	30812.9	18405.6
785.336	15371.1	24713.5	6647.77	11608.5	11698.8	16236.1	25814.7	7149.65	12266.3	12763.8	17748.4	27273.2	7822.05	12889.1	13478.8	7456.65	12546.3	13052.5	17879.5	27656.5	18518.4	28180.9	8350.04	14014.7	14361.4	12672.9	13056.8	19099.3	28404.5	19783
784.338	15004.9	24726.6	6456.08	11771.8	11656.5	15536.3	26941.4	6668.69	12143	12433.5	16318.2	28692.3	6934.86	13018.3	12938.1	6709.27	13110	12916.6	17236.3	30305.4	16729.8	28931.9	7598.01	13929.5	13080.6	14017.2	12921.4	18433.3	32505.8	17856.9
783.341	15443.2	24897.5	6700.47	11601.8	11719.6	15664.4	26478	6795.59	11826.1	11985.9	16148.5	26630.5	7361.17	12516.2	12054.9	7243.77	11884.9	12840.4	17163.4	27858.3	17518.7	28721.5	7779.74	12551.8	13170	12733	13700.7	17505.5	29539.5	18959.2
782.343	15380.2	24807.8	6761.88	11850.2	11689.9	15816.8	25031.3	6893.26	12749.7	12065.3	16886	25139.8	6927.84	13324.3	12954.7	7318.74	14023	13150.6	17306	27066.9	17325.9	26034.2	6935.27	13641.9	14246.2	14602.5	13303.8	17418.8	29707	17356.7
781.345	15367.4	24540.2	6450.04	11660.2	11660.2	16856.9	24646.4	6806.8	11970.6	12058.9	16964.9	25320.5	6947.78	12466.5	12416.6	6839.34	13138.1	12984.8	18253.2	25588.9	17171	25969.5	7532	13274.9	12650.5	14031.2	13947.8	18469.5	26218.2	18397
780.346	15251.9	24763.7	6513.98	11497.8	11467.7	15391.8	25307.9	7013.54	12505.1	12203.7	16200.1	26560.5	7554.66	12744.6	12714	7222.11	12775.7	12528.7	17450.9	28210.4	16938.9	27413.7	7768.13	13055.1	13465.2	13425.6	13728.5	18099.8	28509.1	18316.8
779.348	15128.9	24508.7	6565.38	11443.1	11608.4	15426.9	25895.8	6902.4	12486.7	11786.4	15943.8	27047.8	7302.39	12823.1	11976.1	7478.88	12959.2	11980.9	16950.2	27701.2	16044.2	29621.7	7807.57	13620.3	12395.8	13762.3	12708.3	18487	30045.4	16198.6
778.349	15073.6	24734.6	6481.57	11378.4	11523.6	15617.5	26971.3	7083.21	12328	12384.7	16589.4	27242.3	7359.62	12387	13142	7341.1	12474.2	13124.4	17483.4	28437.3	17814.9	28154.9	7386.93	13331.3	14383.6	13053.7	13394.8	18803	30772.4	18678.6
777.351	14825.5	24224.5	6465.37	11268.7	11128.5	15364.4	26047.4	6585.7	11713.9	11515.4	15489.4	27089.8	6586.54	12742.6	12358.3	7157.14	12619.4	11985.2	15748	27444.3	16414.3	27307.9	6702.6	13762.2	13123.7	12954.9	12521.4	16579.5	30164.2	16513.5
776.352	14965.5	24357.7	6271.49	11249.1	11043.9	16061.6	26066.9	6355.01	11543.3	11820.6	17514.1	28407.5	6818.82	11951.3	12807.5	6377.9	11684.1	12072.7	18797.9	29021.9	18956.3	30466.3	6846.42	12345	13367.4	12421.9	12647.5	20421	30468.3	19116.8
775.353	14637.5	24285.7	6342.9	11059.4	11099.5	15245.3	24926.8	6892.14	11587.8	11500.9	15382.4	25515.5	7098.21	12670.8	11931.4	7307.44	11667.2	12186.6	16756.5	25950.4	16358.7	25847.9	7333.39	12899	12567.6	11726.3	12304.2	18233.8	26925.1	17158.9
774.353	14192	24113.7	6154.12	10907.3	10842.3	14624.6	25695.8	6471.91	11420	10931.4	15216.6	28257	6698.59	12422.2	11519.7	6634.44	12288.4	11941.9	16258.2	29907.6	15919.1	28443.6	6747.72	13371.1	12327.9	13369.6	12080.1	17238.5	31083.2	17181.7
773.354	14484.6	24149.3	6125.49	10870.3	10890.3	15534.4	25405.3	6403.88	11571	11441.5	16180.1	25712.5	6829.21	12696.2	12075.9	6919.31	12000.9	11521.2	16906.3	27527.8	16242.3	26430.3	6940.87	13548.3	12972	13106.7	11823	17612.8	28793.2	17074.6
772.354	14206.8	24289.9	6094.36	10790.8	10738.3	14741.1	24370.1	6209.61	11053.2	11773.3	16143.4	25372.3	6788.64	11102.7	12070.9	6683.52	11729.1	12315.4	17023.1	25934.3	17419.2	27151.5	7335.28	11500.7	12471.8	12010.3	12686.1	17493.9	26054.6	19016.7
771.354	13876.7	23992.9	6003.24	10893.8	10838.8	14108.7	25490.7	6269.09	11451.4	11549.5	15175.2	27337.9	6818.05	11655.1	11862.8	6319.89	11471.6	12330	15863.8	27798.6	15839.6	29245.8	6842.05	11800.1	12492	11918.5	13298.6	17017.3	29077.6	16174.8
770.354	14094.2	23953.6	5784.65	10764.4	10586.9	14418.4	24438.2	6051.82	11749.4	10991.6	15641.1	26490.5	6330.29	12007.1	11653.9	6645.38	12069.8	11387.6	17150.7	28058.4	16093.6	26956	6536.98	13147.7	12083.6	13276.4	12457.8	17932.5	29004	17396.6
769.354	14059.1	23964.2	5796.1	10569.9	10704.9	15366.8	26189.7	6223.95	10917.5	11226.1	15931.2	28727	6830.61	11523.2	11255.1	6532.06	11389.9	11906.2	17278	29892	16065.4	30128.5	6940.7	11714.3	11402.9	12037	12467.6	18646.6	31180.3	16615.6
768.353	14191.5	24084.8	5850.01	10520.5	10503	14249.2	25480.2	6327.91	10752	10598.2	15088.7	26594.7	6903.01	11097.3	10702.7	6605.92	11470.7	10664.3	15530.8	28274.1	16466.2	27570	7550.14	11907.4	11595.7	11916.3	11343.2	16073.7	28880.4	16957.8
767.353	13869.1	23783.1	5868.93	10628.5	10721	14047.4	24945.6	6251.96	11486.1	11182.1	14423.8	27133.9	6257.53	11779.7	12055.2	6428.28	12097.4	11476.3	14975.6	27367.8	14669.2	27598.5	6408.27	12455.8	13025.1	13032.1	11642.5	15052.1	29072.4	15532.4
766.352	14113.8	23626.3	5752.95	10519.2	10499.2	15384.8	24345	6071.95	11157.5	10890	16359.9	25998.1	6310.99	12237.2	11203	6525.87	11435.7	11912.8	17086.4	27838	17336.4	26043.9	6322.08	12282.1	12125.2	11992.4	12355.8	18548.3	29432.2	18978.1
765.351	14053.8	23854.3	5836.82	10722.1	10457.3	15203.7	24224.9	6380.06	11074.2	10788.8	15933.9	24916.9	6833.61	11177.9	10829.7	6983.62	12164.3	11027.8	17233.8	25810.4	16349.4	25775	7335.57	12008.2	11244.1	13018.4	11184.1	18273.6	27659.1	17774.3
764.35	14153.6	23712.6	5700.91	10502.9	10457.9	14352.8	24152.7	6029.88	11232.2	11013.4	14952.9	26434.8	6367.03	12014.9	11013.6	6406.66	11636.3	11733.7	15683.9	28987.4	15012.3	28066.2	6776.15	13074.9	11346.9	12088.4	12803.1	16382.1	29431.2	15257.3
763.349	13764.1	23680.8	5649.94	10351.1	10745.6	14297.1	23824.3	6002.69	11115.1	11239.9	14885.6	24938.9	6270.47	12025.3	12177.9	6593.12	11378.9	11541.1	15225	25210.1	15611.6	26922.3	6588.54	12268.1	12788.1	12244.2	12021.1	15952.2	26567.6	16995.4
762.347	14096.1	23781.3	5549.06	10461.6	10581.4	14562.7	24293.7	5950.12	10613	10814.3	14783.1	24928.3	5957.34	10854.1	11183.8	6306.95	10816.2	11084.1	15805.4	26827.4	15747	25133	6160.01	11868.5	11314.8	11186.6	12098.8	16351.7	28902.5	16840.5
761.345	13761.5	23931.7	5954.85	10577	10482.1	14932.3	25932.9	6385.46	10845	10600.3	16021.1	27297.4	6518.73	11567.1	11406.4	6590.9	11253.5	11549.2	16168.7	28010.8	16767	29272.4	6717.66	11818.2	11656.1	11295.5	12162.1	16255.9	30583	17416.4
760.343	13821.4	24042.1	5656.82	10774.7	10567.6	14388.3	24684.5	6079.22	11073.8	11141.4	15814.5	26235.8	6425.55	11456.7	11887	6167.2	12140.2	11600.1	15906.3	27583.3	16934.4	26893.5	6457.93	11794.4	12551.8	12316.3	11684.7	16996.9	30336.7	16955.5
759.341	13931.2	23880.6	5700.7	10638	10485.8	14579.8	24015	5994.27	10834	10965.8	15552.6	24245.2	6161.23	11460.6	11988.1	6291.54	11046.3	11408.2	16922.4	26507.1	16198.7	25921.6	6503.85	12056.1	12233	11824.1	12434.1	16997.6	26895.4	16464.6
758.339	13866.3	23933.6	5752.04	10695.9	10568.7	14221.9	25278	6150.38	11702.5	11422.4	14588.2	27387.6	6612.57	12385	11617.2	6372.57	12808.1	11880.8	15270.7	30083.7	15792	30013.1	6889.18	13161.6	11707.6	13617.4	12143.3	16652.8	32748.5	16414.5
757.337	14073.2	23719.7	5736.03	10544.3	10604.2	15254.4	24168	6152.83	11477.5	11112.2	15623.7	25026.1	6500.46	12325.1	12030	6516.24	12267.8	11695.3	15667.6	26520.2	16147.5	26341.1	6503.04	12684	12084.7	13063.5	12023.9	15838.7	28014.2	17057.1
756.334	14005.8	23929.8	5672.64	10452.6	10467.6	15104.1	26163	5827.21	11444.4	11259.9	16068.4	28625.9	6017.94	12587.5	11480.9	5859.83	11696.8	12334.2	17414.6	28891.4	17174	29997.9	6494.88	13527.7	12419.7	12163.7	12877.2	18439.9	29155.9	17904.5
755.331	13913.5	23708.6	5679.08	10540.5	10585.3	13948.6	24144.6	6034.59	11382	10623.7	14349.7	26095.2	6251.35	12058.9	10711.1	6303.11	11800.1	11129.2	14726.9	28210.3	14685.6	27466	6377.67	12364.8	10824.5	12884	11876.9	14906.2	28860.6	15971.3
754.328	13993.2	23569.6	5678.05	10518.6	10446.3	15132	25738.2	5687.56	11169.9	11180.1	16150	28312	6029	11845.1	11374.5	5896.12	11878.1	11560.9	17535.9	28418.5	17577.7	30192.9	6193.71	12438	11660.4	12793.2	11650.7	17714.2	29305.8	18308.1
753.325	13783.8	23398.4	5642.12	10613.9	10479.3	14285.7	25606.6	6112.37	11119.4	11265	14344.5	27444.7	6559.85	12208.9	11926.4	6334.08	12103.8	11440.7	15013.5	29080.4	15155.9	28036.1	6909.49	12260.6	12023.6	12901.2	12108.9	15361	29334.4	15612.8
752.322	13666.7	23740.4	5608.7	10479.9	10327.9	13828.4	25866.5	5922.16	10742.9	11182.3	14123.1	27024.9	5982.14	11703.7	11603.2	6128.59	11582.1	11354.8	14535.8	29293.3	14830.9	28880.3	6518.36	12169.3	12431.9	12475.4	12154.1	15226	32194.1	15103.1
751.318	13940.7	23364.9	5468.17	10443.1	10306.1	14288	23450.6	5970.98	11419.4	11180.1	15342.5	25257.6	6151.2	12029.9	12232.5	6539.44	11484.7	11299.4	16388.2	25333.5	16629.1	25357.2	6660.53	13038.7	13346.6	11861.8	12239.9	17718.9	25559.8	16842.2
750.314	13851	23490.1	5698.81	10373.9	10224.5	14870	24453.2	6229.33	11116.7	10360.1	15298.8	26644.9	6700.45	11722.1	10531.8	6489.01	11581.4	10892.1	15783.3	29172.9	16712.2	27384.5	6924.89	11933.2	10728.7	12210	11184.6	16635.2	30053.8	17595.2
749.311	13666.7	23408.6	5603.13	10606.1	10334.7	14337.2	23882.9	6065.15	11388.4	10864.4	14579.8	25250.3	6123.37	12277.8	11581.3	6617.23	11503.2	11809.7	15690.2	25441.1	16001.5	27023.7	6246.53	12844.9	12288.4	11806.1	12513.1	16632.1	25992.6	16437.9
748.306	13726.4	23538.8	5457.7	10462.3	10365.1	13930.4	25205.2	5753.84	10489.1	11114.3	14002.7	27328.7	6030.16	11206.4	11216.3	6141.6	11536.9	11299.5	14704.8	29830.5	14315.9	29851.5	6451.05	11932.9	11278.1	11718.3	11639.7	14914.4	32762.1	15428.7
747.302	13606.9	23462.3	5538.85	10507.6	10291.1	14622.9	25176.2	5766.98	11049.3	10415.4	15394.8	25418.8	5768.46	11922.4	10747.2	5799.65	11595.7	10422.7	15648.8	27552.3	15909.6	27519.6	6314.01	12554.2	10869.5	12755	11426.8	15765.4	29213.2	17222.4
746.298	13574.5	23383.4	5570.19	10665	10475.8	14041.5	25044.6	6126.87	11236.6	10800	14921.1	27229.4	6265.44	11955.3	10843.8	6546.86	11958	11398.8	15050.3	29710.6	15667.4	28637.3	6402.59	12174.9	11138.7	12911.1	11441	16523.3	30649.2	16809.5
745.293	13656.7	23366.7	5618.95	10521.2	10028.5	14831.2	24344.8	6085.44	11423.1	10318.5	15422	24383	6517.13	11468.1	10617.8	6235.63	11831.6	11200.7	16684.8	25053	16180.3	25567.8	6852.19	12266	11293.7	12033.3	11249.7	18219	25503.9	17223.6
744.288	13609.4	23297.7	5451.22	10516.8	10280.4	14816.4	24586.2	5507.96	10573.9	10579	15325.6	27016.8	5578.31	11433.9	11611.5	5716.61	10947.4	10741.9	16659.1	29005.3	16214.3	29630.9	6071.13	11745	12667.3	10959.9	11106.3	17790.5	30054.3	16845.8
743.283	13666.6	23477.5	5562.17	10340.8	10303.4	14289.9	25805.1	6074.54	10870.6	11065.1	15091.9	27284.1	6367.32	10877.2	11326.7	6326.72	11863.2	11548.1	16528.8	28605	15466.6	28525	6546.41	11152.8	11666.3	12772	11716.6	17566.8	29234.1	15684.8
742.278	13758.6	23299.1	5573.58	10440.8	10112.5	14294.3	23370.8	6042.16	10919.7	10746.3	15610.6	24364.3	6248.26	11849.1	11214.8	6368.4	11681.2	10816.8	16433.1	26397.1	16230.2	24366.6	6294.32	12883.5	12242.2	12028.1	11800.5	16442.1	26598.5	17318.8
741.273	13756.1	23242.6	5669.54	10401.6	10478.7	15040.1	25368.3	5710.61	10559.7	10743.2	15235.1	27367.3	6264.95	10680.3	11571.9	5892.62	11512.8	11599.6	15567.6	29595	16546.5	29686.8	6321.07	10999.3	11856.5	11778.7	12125.7	16985.9	30508.6	17546.5
740.267	13666.6	23198.6	5661.05	10419.6	10176	14218.8	24430.5	6203.1	10950	10389.3	14659.8	25515.2	6693.01	11662.5	11189.8	6302.47	11459	11002	15004.9	26534.3	15381.8	26120.9	7215.65	11845.4	12276.6	11942.2	11630.6	15171.7	26634.6	15896.2
739.261	13681.5	23321.1	5510.87	10455	10276	14684.9	25343.6	5631.39	11095.7	10489.8	15437.5	26303.6	5840.76	11691.7	11154	5870.82	12070.4	10959.8	16257	27385.9	16049.3	27517.5	5863.29	12810.8	11379	12108.1	11492.5	17202.7	29176.3	16716.2
738.255	13649.1	23406.3	5519.8	10321.4	10306.4	14253.2	24830.3	5659.99	11237	10768.3	15486.8	25674.1	5893.08	12003.5	11415	5914.55	11932.4	11486.5	15600.2	25727.6	17032	27291.4	6086.33	12407	12453.2	12020.3	12492.2	15777.9	27119	18013
737.249	13594.5	23474.1	5461.64	10428.8	10118.2	14387.4	24598.4	5563.24	10920.9	10525.8	15632.9	25323.7	5944.9	11012.5	11125.4	6029.8	11464.6	11064.9	15792.2	26584.1	16453.2	26165.6	6487.25	11845.5	11755.8	12232.6	11350.9	16230.2	27681.3	16749.9
736.243	13572.1	23238.8	5639.52	10364.8	10225.7	14752.1	25004.6	5726.7	11139.9	10916.8	14943.9	25514.5	5877.47	11213.2	11625.2	6088.68	11188.6	11948.2	15295.3	26160.6	15870.1	26822.9	6438.95	11358.6	12521	12204.7	12791.4	15648.7	26623.7	16994.9
735.237	13890	23338.9	5551.55	10059.9	10054.9	14831.7	24413	5643.44	10678.3	10573.7	15721	25873	5836.59	11103	11217.9	6205.13	11342.2	10866.3	16258.7	26548.5	17271.6	28067.8	6243.72	11719.1	12252.7	11689.7	10909.9	16412.6	28815.7	18974.7
734.23	13656.5	23304.8	5386.62	10249.2	10279	13991.5	25634.3	5923.98	10648.8	10749	15175.3	26448.7	6480.53	11301.5	10828	6314.39	11388.1	11797	16504	28971.2	16060.2	28206.7	6750.3	11844.5	11275.1	12479.4	12071.3	16641	31644.5	16701.4
733.223	13611.8	23015	5552	10257.3	10408.8	14426.2	23377.3	6028.57	10884.4	10999.5	14941.9	24209.3	6318.59	11067.8	11524.1	6270.22	11596.7	12053.7	15249.8	24380.5	16339.7	25516.1	6654.67	11230	12033.5	12749.5	12654	16263.4	25731.6	16663.4
732.216	13745.9	23254.1	5536.09	10426.7	10396.9	13992.7	23826.5	5666.21	11048.6	11258.3	14922.8	23982.3	5784.54	11083	11555.9	5813.65	11456.9	11667.3	15250.2	24210.1	15623.8	25950.5	6233.16	12046.4	11857	12380.2	11944.2	15848.9	24499.4	17018.3
731.209	13726	23081	5599.61	10342.9	10357.8	14072.7	23314	5616.52	11169.5	10820.4	14784.6	24453.6	5719.67	11365	11051.7	5893.99	12185.3	11283	15232.2	26500.3	16072.5	24600.7	5927.24	11957.6	11384.8	12834.3	12374	15369.5	28848.7	17537.5
730.201	13678.8	23431.7	5392.61	10591.7	10271.5	14629.6	25691.2	5843.22	11060.6	10499.9	15619.8	27795.9	5973.7	11917.7	11300.2	5859.95	11701.1	11437.9	16298.1	28268.5	17041	29557.6	6570.14	12324.2	12004.4	12653.6	12078.8	16928.3	28293.1	17614.9
729.194	13835.1	23300.8	5602.52	10512.8	10361.4	13843.2	24677.7	5603.83	11387.6	10732.2	14516.4	26258.8	5970.54	11664.8	10800.8	6056.07	12289.9	10937.3	15548.7	28462.1	15458.3	26568.8	6398.38	12009.7	10947.5	13120.7	11343.6	16707.8	29013.6	15824.8
728.186	13775.5	23299.1	5737.94	10357.1	10399.2	14834	23415.6	5968.69	10565.9	11267.7	15448.5	24148.8	6266.89	11173.2	11858.4	6057.42	11091.6	12211.8	15762.7	24990.3	16238.6	25888	6276.39	11386	12979.5	11800.2	12482	16318.8	26620	17700
727.178	14112.8	23535.4	5478.94	10380	10556.1	14471.3	24808.2	5707.56	10625.4	11482.7	15706.7	26535.9	6187.34	10861.2	11486.6	6264.5	11459.7	11984	16970.6	28210.9	15949.3	28930.9	6233.26	11025.3	11933.1	12383.9	12429.7	17502.9	29390.2	17469.4
726.17	14097.8	23191.3	5557.29	10494.6	10469.8	14952.6	25197.1	5689.14	11128.8	11287.1	15969.4	25648	6245.07	12159.2	11585.2	5946.18	11864.6	12368.9	17169.7	26267.7	17246.4	26743.3	6559.68	12386.8	12601.2	11882.7	13069.8	17628.1	27185.9	17262.5
725.162	13683.7	23648.3	5771.98	10800.1	10477.8	14160.5	24583.9	6105.17	11074.9	10888.1	14271.2	24596.9	6181.33	11970.5	11268.4	6641.88	11520.7	11867.8	14873.4	25207.8	14518	25016.8	6252.3	12468.7	11368.4	12101.6	12603.3	15059	25336.4	15078.3
724.153	13587	23470.4	5703.99	10607.3	10505.7	14176.9	24791.6	6136.43	10819.7	11282.6	15421.4	25805.2	6286	11734.8	12217.7	6713.37	11433.4	11689.4	16626.7	27466.5	16396.3	27636.3	6482.93	12101.2	12951.7	11454.8	12689.4	17083.9	28144.3	16942.9
723.145	13834.8	23401.7	5479.88	10855.7	10575.6	13955.4	24051	5757.31	11044.9	11143.8	14891.4	25023.5	5803.05	11411.2	11726.3	6000.4	11737.9	11639.2	15142.2	27217.1	16069.7	27068.3	6289.87	12386.4	12064.2	12428.6	12759.5	15604.6	28287.5	16882.3
722.136	13961.1	23647.7	5622.61	10605.9	10382.9	14205.6	24070.7	5975.31	11011.5	11017	15198.2	24780.5	6429	11430.3	11825.8	6113.01	11971.3	11065.7	16391.6	26222.3	15596.1	24827.2	6953.96	12554.4	12615.4	12405.7	11217	17954.4	28187.7	16872.5
721.127	13973.4	23432.7	5656.26	10519.7	10708	14305.8	24778.2	6215.67	11351.1	10924.4	14926.5	25069	6398.68	11836.2	11012.9	6767.89	11691.1	11942.5	15440	25952.6	15224.3	26349.3	6703.83	12416.6	11118.5	12261.2	12694.3	16120.9	26141.9	15695.9
720.117	13686	23393.8	5603.21	10777.9	10550	14910.6	23864	6105.08	11808.2	11464.9	14952.3	24132.8	6158.65	12594.4	11636.3	6344.71	12695.6	12528.2	15338.7	24604.5	15639.9	25812	6631.14	13604.1	12409.2	13718.7	13343.5	15837.2	26860.1	15779.7
719.108	13710.7	23416.7	5624.47	10614.9	10345	14911.8	23529.3	5811.83	10867.7	10671.9	15535.7	23813.7	6281.45	11098.4	11370.1	6345.83	11196.2	10752.8	16167.4	24676.9	15812	25603.7	6730.49	11671.2	12092.8	11765.1	10883.2	17004.7	24750.8	16417.1
718.098	13586.9	23749.2	5608.58	10642.7	10340.6	14147.5	24931.3	6039.33	10929.3	11313.1	15133.9	24994.3	6073.72	11793.1	12128.9	6496.98	11826.5	11622.9	16054	27265	15717.4	26375.7	6665.66	11868.1	12796.7	12284.6	12360.6	16635	28419.3	16146
717.089	13799.8	23237.3	5632.31	10638.3	10583.8	13948.5	24595.9	6113.59	10926.5	10790.8	14353.5	26112.4	6566.11	11518.8	11074.9	6664.23	11068.7	11184.6	15121.5	28012.8	14974.6	26155.3	6676.26	11996.8	11156.5	11261.3	11399	16134.5	28902.7	15786.9
716.079	13767.6	23755.3	5621.38	10626.4	10779.9	13922.8	24515.2	6010.38	10959.2	11043.9	14714.4	25808.4	6481.1	11978.7	11066.9	6603.68	11433.7	11698.8	15588.1	27004.9	15742.4	27537.5	6525.73	13158.4	11188.7	11528	12666.2	16328.4	27981.9	16527
715.068	13762.6	23533.2	5692.12	10765.5	10438.9	14887.5	25177.7	6192	11647.2	11147.7	15901.6	27090.3	6583.63	12652.8	11200.3	6712.5	11806.7	11763	16214.5	29701.4	16903.7	29138.4	6680.75	13822.4	11567.5	12145	12036.8	16389.2	31407.1	16970.1
714.058	13769.9	23232	5710.87	10605.2	10412.2	14816.8	23692.8	5767.35	11569.7	10895.2	15421.9	24325.3	5862.8	11835.3	10985.1	6270.74	12286.5	10911.9	16870.4	24334.8	16864.5	26430.5	6355.37	12082.7	11175.1	13446.6	11974.7	18481.9	25939.8	18285.5
713.047	13574.4	23403.4	5457.49	10556.3	10467.2	13940.9	23747	5708.89	11081.7	10480.6	14637.8	25608.1	5913.99	11697.8	11305.9	5721.47	11415.8	11159.1	15766.3	26179.2	15611.5	27344.8	6441.49	11907.7	11798.4	12032.3	11273.8	16366.8	28402.2	16558.1
712.037	13522.5	23470.8	5505.95	10546.9	10156.1	13788.3	25149.8	5646.6	11505.6	10998.8	13904	25172.2	6200.68	12036.4	11048	5945.55	11837.4	11240.4	14230.1	26214.7	15135.6	26510.5	6557.53	12371.7	12126.9	12125.5	12360.2	14633.6	27955.6	15894.8
711.026	13463.1	23234	5581.61	10413.9	10451	13708.6	23479.8	6061.79	10562.6	11188.7	14847.5	25223.9	6087.91	10655.7	12300.7	6147.5	10746.7	11730.2	15712.5	25748.5	15399	27103.4	6572.93	10827	12695.7	11384.3	11787.2	16746.1	27146.4	16393.9
710.015	13465.6	23150.7	5511.35	10241.4	9971.87	13944.8	24866.6	5893.82	10749	10823.3	15139.8	26685.2	6142.29	11318.8	10904.5	6145.39	11012.9	10916.5	16049.5	27405.6	16549.9	27279.9	6171.2	12362.8	10977.5	11602	11770.9	17532.6	29828.6	17581.1
709.003	13527.4	22864.6	5399.1	10145.6	10197.5	13990	24005	5471.55	10394.1	10793.8	14353.1	24410.5	5807.55	10850	11360	5978.67	10754.4	11283	14844.5	26714.3	14459.6	26081.2	6070.44	10879.1	11560.3	11608.4	12400.9	16020.8	28412.3	15619.5
707.992	13544.7	22808.5	5447.54	10304.4	10143.7	13843.3	24251.1	5460.99	10635.4	10610.7	14233.2	25893.6	5576.95	11610.1	10623.2	5902.55	11498.3	11087.8	15166.6	26776	15512.4	28271.1	5666.94	11992.2	10690.8	12590.6	11426.6	16180.2	26794.1	16921.5
706.98	13428.5	22967.4	5463.84	10127	10045.5	13520.6	24855.3	5550.23	10683.5	10259.9	13529.9	26089.5	5696.75	10961.9	11048	5965.33	11299.1	10384.6	14480.4	28218.3	13783.2	28645.2	5886.89	11838.1	12030.2	12152.9	11158.2	14635.2	29457.3	13923.1
705.969	13371.7	22874.3	5443.07	10253.6	10085.6	14497	23461.7	5811.02	11026.8	10685.7	15320	25690	6346.01	11489.4	11367.1	5994.42	11907.7	10806	16099.3	26799.8	15741.9	26804.4	6635.28	12165.6	12193.5	12534.6	11858.4	16467.4	28120.4	16970.3
704.956	13245.8	22998.5	5340.79	10103.5	10049.2	13604.9	24409.3	5453.33	11113.7	10971.4	13721	25810.3	5871.07	11219.3	11578.3	5956.61	11279.9	11751.4	14459.4	26902.1	14035.8	26959.8	5933.2	11859.6	12198.2	11562.6	12891	14496.9	27547.9	14449.5
703.944	13258.2	23147.4	5396.62	10104.2	10161	13870.3	24230.8	5615.96	10157.7	10245.5	14552.3	24361.3	6018.15	10513.4	10906.3	5726.4	10730.8	10410.3	15322.2	26274.6	15597.5	25275.9	6119.67	11085.6	11745.7	11366.4	11353.3	16379.9	26535.3	16649.4
702.932	13411.3	23044.4	5504.29	10186.3	10124.5	14590	23899.6	5588.99	10301.6	10819.6	15150.2	24397.3	6096.3	10645	11715.3	5593.62	10529.1	11734.7	16540.7	25483.7	16463	26228	6368.1	10861.8	12243.5	11392.9	12236.4	16844.1	26192.3	17736.6
701.919	13436	22803.2	5569.94	10137.5	9972.06	13576.2	24997.7	5972.5	10793.9	9990.12	14861.7	26277.4	6337.45	11246.4	10490.7	6416.56	10893.2	10053.4	15788.8	27197.4	15585	26672.1	6933.81	12310.8	11462.5	11661.6	10620.3	17103.2	29146	16694.6
700.907	13315	22949.6	5388.72	10303.5	10333.1	14351.7	23300.2	5531.96	10380.7	11112.7	15337.8	24182.5	5593.97	10699.8	11517.3	5868.18	10473.5	11768.1	15551.8	26593.3	16718.7	25600.9	6012.88	11161.9	11840.4	10645	11951.1	16784.5	27629.4	18245
699.894	13591.5	22960.2	5513.6	10306.5	10276.9	14369.5	23367.4	5655.2	11227.1	11138.2	15143.5	24087.9	6183.09	11691.5	12220.8	5972.92	12150.6	11542.1	15998.2	25801.3	16231.8	25832.2	6275.04	12121.8	13171.2	12209.4	11777.4	16021.5	26334	16407.7
698.88	13668	22867.1	5569.34	10205.9	10151.6	13846.7	23195.5	5612.14	10618.4	10719.5	13944	24740.1	5897.5	11382	11570	6133.58	11244	11472.1	14945.2	25082.3	14940.4	26292	5917.74	12111.2	11926.8	11496.2	12099	15782	27490.9	15572.4
697.867	13337.3	22907.3	5277.2	10428.6	10164.6	13374.6	24804	5415.06	11184.3	10977.3	14258	24943.8	5863.28	11745.8	11977	5860.27	11899.2	11596.5	14903.5	26016.8	15053.4	25898.5	5882.83	12893.8	12330.2	12923.5	12592.8	16034.1	27535.8	15298
696.854	13221.4	23043.7	5624.03	10155.3	10125.7	13777.5	23151.9	5698.51	10598.1	10533.6	13849.7	23349.9	6262.13	11531.9	11109.7	6221.98	11014.8	11264.6	14427.9	25507.1	14004	24200.8	6339.02	12655.1	11423.9	11517.7	11532	15310.6	25569.8	14994.9
695.84	13354.6	22807.7	5534.22	10165.8	10205.3	14572.2	24887.8	5623.46	10427.8	10424.5	15848.9	26087.4	6021.66	11015.4	10669.6	5816.92	10757.5	10914.3	17347.5	27676.1	16487.6	26302.1	6208.14	11379.9	11353.9	11614.5	11874.3	18502.2	29270.1	17697
694.826	13620.9	22924.3	5466.62	10208.3	10435.2	14807.3	23764.5	5787.42	11141.1	10502	16113	24993.1	6314.48	12192.8	11141.1	6285.8	11884.5	10800.6	17464	25325.6	17561.1	25717.5	6589.58	12288.5	11820.3	12504.2	11450.5	17911.4	26090.8	19085
693.812	13295.5	22966.9	5514.93	9935.25	9913.06	13644.1	24396.6	5815.85	10702.1	10474.8	14504.3	25878.1	5962.05	11075.8	10746.4	6042.24	10948.3	11452.8	14626.6	27384.4	15228.8	27515.9	6154.43	11374.5	11111	11379.3	12193.9	14940	29677.4	16289.4
692.798	13298	22770.5	5398.07	9935.89	9963.01	13636.4	24003.4	5525.47	10196.9	10627.3	14710.2	26277.6	5695.6	10887.2	11437.9	5605.77	10497.2	11038	15418.5	27641.6	15247.3	27765.7	6093.4	11541.4	12168.6	10543	11820.6	16938.9	29124.3	15565.1
691.783	13169.9	22879.7	5609.02	10079.5	9754.17	13417.9	24123.4	6081.05	10945.2	10568.2	13940.2	24232.5	6276.16	11085.2	11062.6	6615.04	11125.7	11225	14228.1	24281.8	15169	26162.4	6585.71	12156.8	11374.2	11441.2	12324.1	15607.5	24969.6	16612.9
690.769	13216.7	22934.6	5423.19	10077.6	9892.82	14436.2	25006	5538.32	10200.4	10074.1	14539.8	25946.1	5889.41	10992.7	10711.4	6061.04	11018.8	10444.9	15785.7	26716.7	15460.4	26531.8	6313.42	11850.9	11365.3	11037	10562	16240.9	28993.4	16841.9
689.754	13261.1	22528.8	5412.34	10198.9	9794.93	14535.1	23796.1	5696.28	10378.1	10392.5	15416	23863.5	5899.23	10689.8	10635.7	5880.09	11405.8	10898.7	16535.1	25807.2	16341.6	25751.6	5984.35	10911.3	11212.7	11800.1	11691.8	17858.8	27472.6	17699.1
688.739	13236.5	22470.5	5620.71	9886.73	9921.21	13971.4	23217.9	6001.42	10502.9	10440.7	14631.3	24666.3	6056.91	11330.8	11126.7	6211.78	11277	10581.9	15629.6	24836.7	15641	25117.2	6345.7	12416.6	11898.5	12325.3	10717.3	16528	25246.8	15896.3
687.724	13354.7	22427	5284.76	10045	10118.9	13464.8	24138.8	5746.96	10800.2	10604.6	14449.3	24897.8	5899.81	11797.2	10770.9	6080.43	11804.6	10608.7	14669.5	26480.3	14712.6	27055.9	6440.3	12202.6	11417.6	12061	10869.2	15944	26515	14909
686.708	13079	22144.6	5465.99	9993.9	9740.29	14123.5	24232.7	5617.48	10239.2	10012.3	15403.8	26277.3	6135.85	10390.9	10124.2	5947.39	11141.8	10747.4	16248.3	26359.9	16644	27430.1	6165.41	11224.9	10545.8	11778	11645.7	17011.5	27835.2	17277.7
685.693	13244	22662.5	5494.53	9972.37	10029	13258.4	23780.6	5600.99	10058.3	11020.9	14327.1	24069.5	5791.91	10980.9	11091.9	5830.42	10957.6	11691.4	15090.2	25309.3	14901.3	25324	6006.32	11204.8	11653.8	11838.8	12510.9	15334	27301.6	15358.8
684.677	13027.4	22461.4	5525.51	9948.38	9923.77	13483.1	23775.9	5971.24	10242.9	10861.9	13570.8	24410.4	6043.89	10407.1	11684.5	6442.84	11196.8	11899.2	14637.7	25967.7	14745.5	24763.5	6560.95	10786.1	11985.5	11512.7	12788.7	14981.9	28214.3	15817.4
683.661	13276	22440	5549.11	9971.17	10015.5	13884.6	23067.8	5932.11	10045.7	10775.5	14320.5	24878.2	6085.35	10259.3	11758.6	6356.38	10648.2	11371.1	14927.9	26653.6	14874.3	27248.3	6090.98	11141.9	12405	11235.7	11426.2	15976.7	27210	15549.3
682.645	13219.5	22327.7	5432.45	9979.18	9937.35	13638.5	22957	5765.13	10820.8	10441	13851.5	23157	6129.2	10941.2	10656.1	6338.1	11696.9	10869	14230.1	24267.1	14733.9	24446.2	6188.06	11325.9	10863.6	12046.6	11405.6	15425	26029.9	15548.4
681.629	13032.5	22387.5	5431.45	9913.39	9763.33	13133.2	22516	5506.13	10000.8	9770.13	13391.1	24652.9	6051.82	10226.9	10558.8	5745.06	10753.2	10533.6	13624.3	26436.6	14165.9	26906.1	6450.02	10736	10741.5	11130.8	11130.6	13630.7	27272.3	14684.7
680.612	13197.4	22553.1	5445.21	9955.84	9906.65	14477.7	24073.7	5936.09	10650	10685.2	15301.4	25477.9	6090.2	11031.6	10909.1	6078.97	10725	10771.5	16118.7	25965.7	15451.7	27442.4	6172.28	11952.1	11267.1	10916.5	10900.8	16667.1	26194	16964.5
679.596	13313	22718.6	5333.56	10118.8	9971.22	13917	23041.1	5811.54	10768.6	10104.6	14015.6	23805.2	6028.2	11397	10839	6231.02	11286.2	10514.4	14939.1	25516	15340.9	25286.9	6222.93	11863.2	10968.5	12151.1	11497.9	15859.4	26480.3	15916.1
678.579	12895.1	22626	5445.67	10016.1	10003.8	13905.6	24038.8	5734.15	10500.8	10837.1	14048.2	24472.2	6258.8	10688.5	11618.7	5876.84	11271.4	10876.8	14386.8	26885.5	15237.6	25517.4	6706.6	10802.9	11655.5	11385.6	11669.4	15607.2	28787.7	16355.8
677.562	13163.1	22196.6	5484	9955.27	10048.7	13172.3	22288	5522.99	10061.4	10724.2	14148.4	23506.7	5744.54	10336.3	11295.2	5867.07	10144.5	11514.9	14681.7	24040.1	14185.1	23986.2	6029.4	10450.4	12269.3	11156.2	12219.9	16125.1	25412.6	15147.3
676.544	13401.5	22484.9	5436.3	10027.2	9874.79	13747.6	22779.5	5538.27	10802.9	10253.2	14656.1	24130.9	5839.6	11132.6	10337.6	5812.35	10873.6	10365.4	14661.8	26151	15141.8	25461.7	6097.38	11529.3	11223.9	11113.3	11145.2	15536.8	27497.4	16011.1
675.527	13232	22404.6	5506.56	9934.41	9988.47	14415.4	22983.3	5837.61	10857.3	10748.2	15109.8	24751.1	6297.06	10935.9	10788.3	5951.66	10938.5	11460.2	15118.3	26283.6	15375.9	27066.8	6795.85	11231.4	11078.8	11639.5	12139.8	15486	26714.9	16847.8
674.509	13143.5	22842.7	5422.02	9969.43	9930.13	14451	24586	5668.88	10567.2	10154.4	14995.7	26572.2	6130.17	10738.1	10515.1	5801.08	11044.8	10220.5	16016.2	28170.4	15456.4	26749.4	6418.8	11212.3	10559.5	11380.1	10868.1	16226.5	28981.8	16475.7
673.492	13241.8	22708.3	5519.27	10137.1	9891.46	14551.7	23878.4	5764.74	10411.4	10822	15863.2	25856.9	6243.8	11012.6	11026.6	5922.52	10872.6	10833.3	16728.2	26663.8	17227.4	26277.5	6621.14	11969.4	11598.5	11016.7	10854.8	17435.4	26816.4	18815.6
672.474	13146.1	22478.2	5542.81	10088.6	9749.66	13569.3	22491.5	5659	10098.5	10381	13941.4	24406.1	5861.53	10874.1	10668.6	5756.57	10696.5	10518.6	14998.7	26178.9	15266.3	24956.5	6330.52	11308.3	11325.7	10790.1	10967.9	15916.2	28309.5	16213.3
671.455	13264	22469.2	5558.98	10189.8	9900.1	14279.1	24630.6	5671.15	10275.3	10023.9	15418.9	26141.2	5788.4	10465.6	10903.9	5845.68	10789.5	10470.3	16087.2	27763	15961.2	26970.1	6293.94	10782.5	11217.8	11426.3	11393.8	17601.5	28927.3	16554.3
670.437	13305.7	22570.6	5616.88	10207.6	10082.4	13433.4	24492.4	6088.28	10875	10234.9	13613.5	25457.4	6616.96	11272.2	10978.6	6143.73	11436.4	10460.2	13832.5	27282	14434	27607.4	7169.39	12387.5	11237.7	12501.8	11406.1	14201.8	28247.6	14488.4
669.418	13185.5	22257.2	5559.39	10105.1	9940.64	14143.1	22817.1	5975.6	10425.8	10580.9	15556.1	23152.7	6349.69	10530.3	11378.3	6404.57	11396.6	11491.2	16859.6	25209.4	15708.9	25005.4	6860.78	10599.9	11959.9	12373.7	12077.8	17301	25304.2	15758.6
668.4	13509.4	22888.7	5612.36	10208.8	10037	13827.2	24833.5	5731.92	10480.6	10847	13915.4	24844.9	5930.43	10820.3	11274.1	5954.76	10895.8	10983.2	14943.2	26504.7	14400.1	26293.7	6098.7	11194.1	11557.9	11818	11472.8	15958.6	27642.2	15694.8
667.381	13281.2	22560.6	5466.57	10010.6	10010.6	14019.7	23961.5	5521.87	10806	10926.5	14565.3	26323.8	5928.61	10818.2	11981.9	5994.67	10837.3	11778.3	15434	27526.4	15737	26549	6326.38	11755	13108.1	11047.5	12674.7	15671.5	28591.8	16995.8
666.362	13219.9	22350.4	5499.91	10337.5	9998.94	14361.3	24149.5	5800.52	11291.1	10283.5	14851	26275.6	6240.2	11965.9	10465	6228.66	11618.8	10392.4	15907.3	28432.2	15139.6	26864.7	6655.36	12573.1	10768.1	11957.3	10872.9	16896.5	29752.6	16526.6
665.342	13089.9	22567.1	5609.27	10161.4	9982.38	13302.2	24586.2	5938.92	10616.1	10338.7	14290.8	26258.9	6006.14	10638.4	10475.5	6223.18	11266.5	10925.9	14499.1	28784.3	14501.7	26819.8	6575.57	10814	10930	12359.4	11460.2	14903.2	31449.2	15049.6
664.323	12991.9	22651.2	5446.39	10105.6	9781.92	13424	23576.5	5827.59	10606.7	10157.5	14623.3	25415.8	6373.78	11423	10377.3	6187.91	10652.4	10735.9	16058.6	26485	15531.5	27675	6616.5	11708.9	11175.2	10853.2	10822.3	16621.3	28232.5	15660
663.303	13197.9	22470.5	5521.39	10071.9	9951.74	14082.3	23902.8	5550.16	10998.6	10624.5	15227.6	25620.1	5918.07	11151.6	10985.4	5648.24	11107	10904.8	15238.2	27410.1	16522.5	28092.3	6308.54	11480.9	11286.6	11396.7	11663.4	16470.4	29127.7	17938.5
662.283	13195.5	22289.9	5517.92	9949.91	9900.89	14476.6	23767.1	5548.86	10674.3	10611.2	14836.1	24494.5	6005.19	11312.7	11331.9	5566.67	11027.5	11022.2	15991	26041.2	15327.6	24733.7	6361.84	12403.6	11545.2	11195.9	11368	16929.4	28417	15814
661.263	12965.1	22011.3	5563.48	10144.2	9764.27	13624.1	23100.5	6059.83	10701.7	10550	14351.9	24869.6	6587.87	10750.3	10614	6241.05	11534.3	11593.8	15468.5	24878.6	14579.2	26939.9	6704.38	11547.2	10666.5	12068.5	11606.8	15727.1	26171.8	15257.6
660.243	12975	22085.6	5594.31	9956.05	9880.09	13291.1	23511.4	5781.63	10805.9	9952.98	13316.3	24722.9	5881.82	11151.5	10933.6	5837.34	11728.6	10573.9	14100	25755.3	14040.5	26274.1	6453.17	11644.8	11472	12895.1	11517.5	14744.5	26035.8	15125.8
659.223	12940.7	22135.5	5610.43	9998.32	10027.7	13764	22229.6	6072.12	10806.8	10041.2	14418.8	22545.1	6440.64	10891.4	10873.9	6240.91	11053.5	10154.5	14630.3	24057.7	15579.2	23514.9	6740.39	11067.8	11517.5	11099.6	10865.8	15192.6	24832.9	15640.2
658.202	13107.4	22425.3	5445.28	9989.13	9888.7	14177.9	22804.7	5788.1	10569.2	10317.7	14740.4	23393.7	5924.43	11521.1	11134.4	6007.34	11084.1	10455.1	15129.4	25319.8	15070.7	23868.9	6436.5	11620.2	12228.8	11852.8	11099.5	15258.8	26758.6	16443.9
657.181	13251.9	22377.1	5429.58	9886.88	9681.16	13756.5	24275.5	5912.91	10823.5	9787.77	14019.1	25059.1	6234	11484.6	10257	6096.24	11215.8	10086.4	15125.3	26248.2	15228.6	25519.8	6294.67	11925.4	11203.2	11775.1	11004.9	15771.7	28147.3	16381.5
656.16	13151.5	22133	5413.89	9997.7	9769.98	13438.6	23005.7	5869.23	10795.2	10050.1	14084.6	25300.5	5957.73	11766.7	10722.9	6265.02	11627.7	10691	14295.6	27166.1	14240	25700.3	6433.07	12310.2	11441.9	11800.3	11197.9	14612.5	29368.1	15626.7
655.139	13051.2	22310.1	5537.75	10003.2	9770.63	13894.2	23040.2	6079.74	10104.4	10501.4	14380.9	24800.9	6505.6	10229.4	10583	6311.28	10210.5	10855.6	15300.1	25377.5	15657.2	27183.7	7051.06	10738.7	11206.8	10509.4	11528.9	15803.8	27447	15935
654.118	13156.5	22208.1	5477.99	10087	9658.68	13258.1	23474.4	6009.27	11006.7	10557.8	13301.1	25059.5	6541.41	11960.7	10770.7	6103.25	11364.1	10628.9	13686.5	26629.6	14569.4	26422.4	6888.18	12958.7	11364.7	12395.3	11321.9	14088.2	28253.2	15834.7
653.096	13107.6	22434.1	5525.92	9806.19	9860.03	14049.8	24113.8	6032.73	10199	10674.1	14572	24790.6	6600.84	10417.4	11540.5	6247.01	11033	11474.9	15961.6	26764.3	15726	25342.6	6700.53	10969.7	12578.7	11524.9	11848.8	16115.9	29042.2	16379.9
652.074	13107.6	22417.7	5402.57	9850.87	9740.77	14089.9	24169.8	5750.95	10561.3	9869.74	14473.5	25882.9	5893.01	10883.5	10052.7	6034.85	10735.7	10735.6	14899.9	26938.3	15498.9	26646.6	6315.42	11113.7	10118.1	11209.9	11045.5	15078.7	28723.6	16946.6
651.053	12997.5	22127.4	5533.68	10027.6	9929.79	14070.1	24217.7	5662.98	10841.9	10309.4	14755.5	25290.3	5703.13	11371.3	11156.8	5832.71	11608.6	10677.9	16194.5	27480.9	14764	25752.8	5967.87	12210.4	12090	11990.8	11261	16568.9	27899.2	15589.4
650.03	12909.5	22416.8	5588.91	9920.63	9737.18	14107.1	24548.7	5684.27	10512.2	9743.49	14343.3	25233.4	6036.53	11474.3	9995.64	5741.64	11515.6	10069.4	14441.8	26865.8	14392.7	27470.7	6328.32	12206.5	10400	11589	10991.4	14775	29011.4	14563.7
649.008	13122.4	22351.5	5406.92	10043.5	9764.74	14263	23927.3	5879.42	10396.1	10016.2	15416.4	24818.1	6207.1	10690.4	10690.6	6237.82	11337.6	10813.5	16667.7	24947	16210	26497.2	6318.1	11005.7	11667.3	11475.2	11411.3	18217.7	26472.4	17317.2
647.986	13068.6	22230.1	5528.17	10119.9	9938.98	13820.9	22746	5771.34	10671.9	10086.2	15153.8	24016.8	6187.25	10745.4	10389.4	6161.9	11669	10780.4	15783.7	25535.9	15220.6	24125.7	6403.8	10747.7	11243.9	12150.2	11632.3	15923.1	25744.1	15698.5
646.963	13036.9	22521.8	5588.27	10017.8	10020.3	13396.2	22666.7	6107.03	10032.6	10789.8	14485.2	23465.3	6697.49	10885.2	11552.1	6293.98	10845.1	11069	15638.4	24927.7	14550.7	24297.1	7169.64	11180.2	12291.2	11759.2	11294.9	16028.3	26261	14889.3
645.94	13291.1	22502.9	5714.34	10243.3	9774.01	13677.4	23537.6	6069.06	11091	9935.73	13899.3	24922.9	6099.45	11367.9	10268.6	6391.36	11349.8	10862	14559.3	27284	15056.4	25417	6278.03	12498.6	10398.4	11930.7	11726.4	15361.8	29805	16169.9
644.917	13210.4	22557.4	5639.97	10246.3	9975.03	13213.8	23196.1	5991.94	10736.5	10910.4	14059.2	24318.4	6410.09	11744.8	11231.2	6303.59	11497.3	11024.4	14341.5	26642.7	15168.3	25596	6490.05	12297.5	12047.8	11535	11955.2	14380.4	28467.3	16541
643.894	13330.2	22765.9	5700.02	10249.3	10329.9	13639.3	24761.7	6149.24	10478.7	10898.6	14902.3	26000.8	6461.8	11213.1	11321.8	6760.84	11336.3	10985.5	15887.8	27212.1	15287.9	27335.3	6824.9	11434.4	12407	11498.8	11834.4	16619.2	29574.8	15690.2
642.87	13212.9	22742.1	5601.25	10252.3	10081.3	14026.2	23835.5	5996.11	11203.6	10175.5	14762.1	25221.6	6195.37	11955.1	10432.8	6372.88	12270.5	10215.5	15245	26975.5	14873.6	26102	6434.41	12261.2	10462	13346.1	11120.1	15305.6	29131.5	16102.3
641.847	13085.9	22415.5	5800.49	10255.3	10042.8	13314.8	24051.6	5892.94	10752.4	11012.3	13421.4	24509.7	5976.27	11419.8	11269.8	6401.91	11317.5	11758.5	13808.4	24900.6	14522.9	25614.7	6533.2	12204.3	11884.9	12004.9	12652.9	15016.3	24954.8	14541.5
640.823	13298.4	22531.1	5630.94	10165.5	9938.38	13597.3	22837.4	5840.29	10301	10807.7	13735.4	25101.9	6089.04	10651.7	11274.3	6179.44	11210.9	11695.7	13874.2	26559.2	14575.5	27244.2	6395.78	10907.3	11321.4	12318.3	11935.7	14293.1	27413.2	15372.1
639.799	13305.7	22348.7	5539.57	10105	10065.9	13901.6	22416.7	6036.39	10664.3	10420.4	13964.2	24565.9	6435.59	11079.4	11192.2	6337.39	11165.9	10703.3	14720	24769.2	14878.3	25253.3	6893.46	12114.3	11867.9	11796.1	11738.4	15447.7	25987.8	16006.2
638.775	13161.7	22366.5	5587.36	10193.5	10100.7	13869	23016.6	5895.37	10316.7	10881.3	13919.8	24961.3	6199.61	10699.8	11886.6	6118.42	10406.7	11237.4	14057.2	27354.1	14152.3	27079	6386.95	10765.5	12712.7	11206.5	11348.5	14112.4	29161.4	14846.3
637.75	13220.3	22713.9	5754.73	10220.9	10257.5	13687	24576.3	5986.53	11097.5	10356	14084.2	26026.6	6505.3	11559.3	11128.5	6065.25	11299.9	10828.4	15309.9	26074.8	14661	26762.5	6819.67	12640.2	11979.4	11516.2	11282.2	16535.1	27468.3	15914.4
636.726	13344.7	22702.4	5943.99	10089.7	9940.82	13620.7	24490.8	6520.68	10952.9	10187.8	14409.4	25485.2	6548.23	11856.5	11150.5	6944.34	11947.1	10384.2	14684.4	25715.5	15098.5	27511.8	6619.68	12184.5	12204.4	12320	10837.1	16082.9	25810.1	16391.9
635.701	13420.3	22525	5942.9	10400.1	9987.78	13736.7	24163.2	6304.46	11424.2	10263.2	14736.3	24249	6397.65	12149.4	10391.1	6489.23	12200.4	11134.6	16197.4	24299.4	15708.5	25498.8	6412.18	12433.1	11264.2	12671.2	11827.6	16486.4	26408.1	16338.6
634.676	13273.9	22886.7	5722.28	10198.1	9912.76	13430	23369.5	6230.16	10631.8	10892.3	14764.6	24495.6	6759.94	11433.4	10957.7	6791.68	10715.7	11781	15270	25551.7	16061.9	26368.7	7059.77	11609.4	10967.6	11259.5	11799.2	15691.1	27030	17512.5
633.651	13252	22228.9	5716.35	10076.8	10032.9	14238.6	22400.9	5756.2	10211.7	10739	14995.6	22835.4	5921.83	10632	11003.5	5869.05	10908.3	11498.9	15533.1	24839.6	16465.7	24798.7	6178.69	10799.9	11782.7	11323.8	12196.8	16061.4	24922.7	17086.6
632.626	13447	22444.2	5846.96	10021.3	9855.47	14536.8	23531.2	5933.5	10227.7	10091.5	14597.4	23574.9	6071.57	11245.1	10418.4	6010.74	10282.8	10139.7	15910.1	24226.3	14790.7	25405.9	6157.04	11919.3	10973.4	10419.2	11059.5	16777.9	25273.8	16201.1
631.6	13359.2	22591.2	5714.24	9973.1	9934.1	13945.2	23373.4	5920.62	10721.6	9934.75	14561.7	25622.1	6192.89	11321.6	10373.8	5941.05	10997.5	10801.3	15425.1	26291.1	14822.6	26752.7	6273.84	11991.9	10872.9	12052	11552.4	15801	28595.3	15046.6
630.574	13325.1	22209.3	5742.44	10195.5	10054.1	14293.4	24241.9	5924.86	10759.6	10874.1	15630.7	25094.3	6060.22	11269.7	11388.1	6041.71	11306.8	11644.6	16811.9	26734	15830.1	25742.8	6295.26	11454.5	12509.6	11378.5	12162.1	18155.1	28657.4	17227.5
629.549	13290.9	22205.2	5678.02	10132.7	10062	14504.3	23375.3	6234.23	10826.9	10508.8	14769.6	25305.5	6354.04	11883.3	11356.9	6288.97	11045.8	10691.4	16149.3	27538.6	15093.5	26620.1	6461.77	12788.7	11941.5	11894	11573.1	17552.6	28706.7	15819.1
628.523	13215.4	22593.4	5808.54	10269.7	10286.8	13336.3	22846.2	6149.61	10489.9	11276.4	14091.2	23396.2	6298.97	10549.9	12359.2	6319.62	10837.6	11928.8	14656.2	24695.1	14898.4	24434.7	6567.25	10913.2	13429	11027.6	12983.6	15380.1	24870.4	16031
627.496	13420	22535.6	5844.01	10206.9	9919.47	13810	24767.8	6148.96	10310.2	10568.8	13939.5	26019.3	6710.53	11179.4	11221	6730.93	11092	11061.4	15021.1	27505	14572	28148.4	7155.19	12157	12224.9	12019.9	11929.9	15313.1	28491.2	15747.1
626.47	13424.9	22870	5794.22	10368.2	9900.59	14160.7	23944.4	5822.48	11085	10820.7	15321.2	24367.9	6139.34	11322.5	11641.4	5908.34	11932.6	10867.1	16259.5	25359.9	16323.8	24498.7	6515.39	11420.1	12474.1	12414.7	11038.8	16832.4	27214.8	16942.1
625.443	13378.5	22527.3	5795.59	10315.2	10110.6	14195.6	23456	6115.72	10915.4	10904.2	15149.8	23742.8	6314.91	11278	11224.7	6404.67	11611.7	11889.6	16516.4	25112.9	15898.6	24168.9	6837.36	12372.3	12072.7	11994.9	12230.6	17610.5	25606.6	16320.2
624.416	13346.9	22805.6	5967.38	10425.3	10274.3	14266.2	24406.7	6254.91	11077.4	11240	14966.4	25152.1	6863.51	11711.9	11287.7	6401.68	12172.6	11869.4	15844.3	25616.9	15828.3	27614.3	7399.11	12572	11405.8	13048.1	12622.7	16411.6	27904.9	17022.8
623.389	13583	22599.3	5951.67	10389.3	10389.3	14374.5	24210.7	6028.8	10594	11027.5	15172.8	26050	6520.06	10974.9	11903.3	6173.72	11060.8	12080.6	15600.5	28611.6	15447.2	27042.7	6986.93	12066.2	12945.5	12125.3	12927.4	16249.6	30756.6	15882.5
622.362	13563.4	23113.5	6028.46	10703.7	10212.1	13755.1	24536.6	6386.53	11599.6	11115.7	15030.3	26844.3	6975.73	11825.1	11719.4	6554.32	12469.1	11181.5	15086	27099.3	15801.1	27796.1	7151.71	12958.4	12517.8	12786.7	11478.7	16263.8	28175	17317.9
621.335	13794.5	23179.8	6329.08	10716.4	10395.2	14842.5	25012.2	6519.61	10940.7	10407.4	15308.5	26739.8	6799.67	11013.9	10649	7028.94	11499.9	10883.6	16076.3	27057.5	16598.1	27884.9	6864.05	11822.5	11610.9	11864.8	10913.2	17487.2	27249.1	18024.4
620.307	13801.7	22676.8	6118.68	10660.9	10476	14996.1	24716.2	6162.04	10945.1	11415	15387.4	26385.4	6665.21	11719.6	12189	6354.53	11605	11569.6	15690.8	28652	15891.2	26450.4	7141.06	12074.4	12768.6	12679.9	12328.7	16933.1	30870.7	16426.4
619.279	13714	23112.9	6253.77	10415.6	10206.5	14116.3	23889.2	6576.53	10997.7	10645.6	15324.1	25297.3	6726.39	11002.9	11570.4	7056.16	11021.1	11499.3	16624	25477.5	16362.9	26462.9	7019.1	11852.4	11799.8	11549.6	12558.5	17164	27108.9	17340.3
618.251	13456.1	22921.4	6160.2	10622.9	10549.9	14666.2	23804.7	6434.77	10735.6	10683.2	15215.6	24151.3	6761.15	11513.8	11480.4	7031.53	11153.7	11004.1	16697.9	26405.9	15747.2	25054.1	6995.27	11757.4	11688.6	11277.9	11398.8	17539.4	26483.2	15971
617.223	13553.3	23082.5	6217.42	10693.9	10406.9	14261.3	23579.8	6293.23	10787	11027.7	15241.2	23760	6504.1	11385.7	11669.5	6688.66	11642.4	11809	16459.6	25572.3	15974.1	25461.8	6602.45	11542.3	12572.6	12178.9	12120	17581.5	26597.2	16324.6
616.195	13738	22827.8	6170.08	10570.3	10123	15057.9	24056.3	6353.73	10797.4	10225.2	16328.8	25148.7	6654.87	11828.9	10750.8	6467.84	10893.9	10886.7	17867.7	25803.5	17642.5	26510.4	6726.54	12243.1	11652.3	10956.7	10968.5	18276.6	27850.6	18984.2
615.166	13988.3	23166.3	6329.36	10595.1	10371.5	14677	24493.9	6920.62	11602.4	11282.1	15084.5	24643.1	7310.28	11618.2	12339.2	7556.27	12368	12195	15183.2	26106.5	15824.5	25725.1	7487.1	12371.5	12652.8	13403.7	12789.8	16625.9	28200.5	17265.1
614.138	13694.1	22821.8	6238.28	10559.1	10559.1	14231.3	23780.2	6366.65	11328.4	10872.4	14767.2	25205.6	6560.63	11558.5	11619.9	6747.44	12160.9	10955	15221.1	25654	15242.2	26285.3	7043.9	12624.9	12429.6	13091.8	11843.8	16051.1	26996.6	16727.5
613.109	13796	22910	6412.07	10805	10535.3	15068.9	24932.9	7018.3	11724.1	11029.9	15404.2	26153.8	7080.06	11744.4	11995.1	7370.92	12886.4	11995.3	16355.3	28350.6	16556.2	27056.8	7308.45	12368.7	12852	13928.3	12940.1	17197.3	30731.5	17239.3
612.08	14116.6	23012.6	6389.02	10533.4	10569.8	14588.8	24600.1	6624.85	11386.4	10819.6	14737.6	24956	6642.19	11714.5	11133.9	6985.6	12188.4	11316.4	14817.9	27390.9	16020.3	26942.9	7134.84	12515.8	11309.2	13359.2	12286.7	15775.7	28698.3	16105.7
611.05	13846.8	22865.1	6455.85	10563	10478	14643.2	23863.2	6549.57	10865.2	11509.6	16107.4	24914.4	6609.97	11829.4	12622.5	6724.24	11533.6	12448.5	17680.8	26553.4	17585.3	26840.6	6945.38	11970.7	13666.1	11654.9	13367.3	18917.2	28370.5	18754.1
610.021	13897.7	23349	6542.08	10716.5	10803.9	14059.4	25594.8	7151.52	11717.3	11614.5	15311.7	27314.9	7384.58	12526.8	11687.8	7302.16	12697.1	12262.5	15899.1	28552.7	16089.7	28039.1	8000.09	12756	12807.6	13117.1	12268.9	16923.4	31354.3	17008.6
608.991	14079.6	23383.5	6548.15	10945.2	10690.2	14263.8	25155.7	7053.97	11246.8	10850.5	15049	27374	7750.45	11329.8	11105.4	7284.84	11707.4	11536.1	16442.9	27828.5	16506.3	29830.3	7790.51	11665.8	11837	11880.2	12503	16605.4	30333.2	16721.9
607.961	13979.9	23464.1	6690.17	10765.9	10753.8	14197.8	25614.1	7204.28	11179	11009.7	15540.8	26048.1	7408.64	12174	11719.6	7902.58	11332.5	11108.2	16840.1	26446.6	16149.2	27719.8	7669.14	13047	11800	11768.7	11496.7	18222.6	27874.4	17632.9
606.931	14154.5	23129.7	6550.59	10890.1	10766.4	14953.8	24981.4	7039.25	11809.1	10891.5	16018.1	25116.9	7714.01	12936.1	11585.9	7701.03	12517.5	11562.6	17212.1	25238	16763.6	27499.3	7961.97	13818.8	12567.7	12671.7	12506.1	17497.7	26548.3	17902.3
605.901	14088.8	23055.1	6636.74	11060.4	10943.9	15272.3	25270.3	7089.9	11299.8	11029.1	16780.4	25761.3	7760.72	11671.6	11299.3	7776.83	12078.8	11267.6	17352.8	27304.4	17491.4	26294.3	7827.47	11727.8	12232.3	13071.7	11459.3	18231.7	29774.1	18538
604.87	14173.6	23402.6	6761.67	11051.1	10971	15317.6	24471.4	7155.16	11748.5	11619	16271.1	26839	7697.52	12207.2	12171.5	7317.97	12561.7	12201.4	17862.3	28024.7	16589.2	27020.9	7789.99	13030.4	12754.7	13161.3	13399	19476.4	30820	17940.6
603.84	14224.3	23357.1	6711.91	11095.1	10842.9	14335.5	23960.9	7249.42	11723.8	11398.1	14731.2	26058.2	7798.04	12303.3	12389.8	7631.5	12130.8	11632.8	15446.7	27408.2	16063.6	26115	7902.54	12821.9	13503.6	13232.8	11963.9	16489.5	27894	16967.4
602.809	14071.3	23338.2	6710.67	10964.6	10751.1	14467.2	25371.1	6762.95	11913.2	11267.4	15729.4	27175.5	7292.42	12195.4	12324.3	6815.13	12579.6	11730.9	17174.8	27865.8	16671.6	29242.8	7657.11	12459.8	12334.6	12845.8	12814.2	17611.1	29600.8	17874.2
601.778	14165.7	23251.4	6748.23	10882.5	10899.5	14936.3	24416.5	7381.84	11203.4	11444.9	15191.7	26208.6	7820.94	11353.6	12141.1	7958.45	11557.1	11777.2	16394.7	27085.7	16104.7	27836.3	8205.27	12130.7	12751	12354.6	12610.8	17062.1	29014.3	16393
600.747	14165.5	23288.4	6688.79	10992	10924.1	14960.1	25022	7146.79	12053.7	11873.3	15835.4	27384.5	7820.97	12123.6	12036.1	7638.53	13034.1	12211.6	15962.3	28580.4	16257.9	28752	8370.84	13045.1	12264.7	13774.8	12845.5	16546.9	30230	16963.5
599.715	14184.7	23082.9	6757.85	11116	10948.8	14700.1	23812.7	7360.46	11660.5	11877.8	14912.1	25557.7	7692.47	11772.2	12737.2	7905.47	12373	12556.2	15192.4	27116.5	15068.3	26711.7	7877.94	12195.3	13947.8	12963	13571.4	15583.6	27801.6	15358.7
598.684	14434.1	23209.5	6717.83	11106.7	10925	15591.2	24781.4	7337.36	11714.9	11027.4	16676.9	27151.2	7428.53	12307.4	11238.2	8034.57	11837	11278.3	18165	27220.7	17121.6	28236	7578.49	13206	11260.5	12902.4	12027.4	19976.6	27240.4	18110
597.652	14123.7	23103.4	6723.86	10889	11017.4	15149.8	24408.9	7311.33	11778.2	11231.7	16653.2	25891.5	7519.17	11782.5	11549.5	7979.74	12407.9	11591.8	18146.7	25901.8	17782.9	26693.8	8131.31	12479.3	12418.4	13299.7	12705.4	19057	27735	18826.7
596.62	14152.6	23145.2	6543.34	10954.8	10814.3	15533	25079.9	6808.75	11810.1	11253.3	15859.8	25483	6977.74	12849.5	11368.9	6984.96	12002.8	11645.9	16144.5	25888.5	17270.4	26131.1	7567.57	13259.5	12080.3	13098.2	11913.4	17093.4	26935.8	17944.1
595.588	14089.4	23308	6549.4	11047.3	10727.5	14177.7	23969.2	6576.06	11367.5	11128.1	14993.4	24021.2	7208.32	11901.7	12229.1	7045.5	11692.3	11821.7	16275.3	24041.4	16403.1	25566.3	7871.47	12079.7	13435.3	12754.8	12608.8	17478.8	25870.1	16868.1
594.556	13975.4	23323.1	6768.56	10757	10803.1	14095.6	24789.5	6880.66	11650.2	11344.9	15315.4	26079.9	7553	12376.2	11390.2	7354.98	12266.1	11395.8	15676.3	28374	15503.6	27462.9	7967.63	13079.1	11946.7	13283.8	12092.7	16953.1	29655.5	15744.3
593.523	13968	23171.1	6743.1	10968.1	10851.9	14523.8	24005.1	6946.25	11501.4	11123	14878.9	24742.2	7096.6	12240	11552.5	7484.87	12365.4	11226.6	16148.7	26301.8	16277.3	26441.4	7114.13	13406.1	11966.4	12809.2	12123.1	17505.5	26682.2	17193.5
592.49	14009	23009.4	6603.87	10825.7	10496.5	15205.4	24710.6	6911.39	11902.9	10749.2	15924.2	26214.6	6942.9	12493.1	10851.3	7177.01	12265.7	11534.7	17089	26981.6	16921.8	28415.7	7287.42	13570.3	11064.3	12719.2	12299.7	17208.8	28654.6	17396
591.457	14144.4	22922.9	6464.69	10959.2	10724.5	14873.4	25038.6	6907.64	11864	11126.4	15301.6	25397.7	7445.08	12735.3	11198.4	7018.85	12147.1	11587.3	15414.1	27368.4	15391.6	26260	7879.72	13838.2	11526.8	12307.4	12211.4	16481.1	29436.5	16275
590.424	14161.1	23017.9	6436.87	10722.5	10628.1	14393.2	25060	6576.29	10725.8	11225.9	14904.2	26872.9	6833.28	11161.8	12037.4	7189.6	11599.8	11627.3	15998.8	26947.5	15255.2	28604.7	6973.86	12079.3	12989.6	11888.5	12386.4	17021.8	27538.9	15303.6
589.391	13877.8	22967.6	6559.07	10589.8	10543.9	14797	24265.3	6897.97	11567.4	11509.9	16266.2	26293.9	7167.45	12118.1	12561.3	7112.31	12517.7	12390.2	16969.4	28872.7	17532.8	28484.2	7754.53	12745.8	12744	13017	13380.2	17340.6	30767.4	18906.2
588.357	14141.4	22975.5	6386.11	10783.8	10529.8	14892.6	23162.1	6435.31	11422.9	10791.3	15233.5	23636.9	6437.66	12268.4	11864.4	6457.87	12116.8	11365.2	15807.1	25262.3	16321.1	24088.2	6897.28	12949.4	12128.2	12787.8	11878	16007.1	27395.3	16737.6
587.324	13851	23024.5	6317.21	10849.5	10520.6	14751.1	24505	6791.49	11322.6	10556.4	15273.1	26843.7	7449.26	12446.5	11004.6	6894.55	11942.6	11225.7	15554.8	27496.9	15930.6	28812.6	8051.57	13393.3	11813.3	12695.6	11238.1	15931.3	28864.6	17074.5
586.29	13833.9	22807.4	6391.01	10569.5	10675.9	14736.6	23208.2	6944.64	11041.4	10709.2	15790.3	24666.2	7004.1	11583.6	10928.4	7069.16	11657.7	11361.6	15889.6	24956.6	16521.7	26318.4	7613.62	11626.8	11096.4	12048.8	12359.7	17182	25763.6	17034.1
585.256	13727.4	22728.2	6464.77	10637.6	10567.5	14397.8	24280.5	6498.77	11573.3	10837.9	15819.4	24492.7	6948.03	11721.2	11779.8	6748.57	11850.5	11444.7	16739.5	26584.9	16775.6	26481.5	7495.56	12225.8	11929.7	11913.3	11840	17364.6	27082.3	17143.3
584.222	13855.4	22864.2	6378.97	10865.3	10510	15089.8	23461	6824.86	11574.7	10654.2	15738.7	24265.7	7195.84	11850.8	10714	7020.78	12598	10957.3	16093	25131.5	16536.2	25874.6	7781.9	12885.3	11108.2	13491.5	11747.6	17585.9	26044.7	17983
583.187	13683.6	22971.2	6211.04	10585.3	10476.6	14654.5	23409.7	6350.95	10850.7	10879.8	14970.6	25563.4	6404.36	11673.6	11714.7	6441.77	11902.3	11781.3	15197.3	27531.8	15464.3	27259.4	6621.77	12589.6	12494.2	12593	12250	15414.4	28780	16990.9
582.153	13884.1	22631.1	6383.86	10747.7	10445.7	14066.7	23871.9	6511.28	11081.2	11159.9	14251.5	23954.5	6861.48	12111.1	11986.1	6658.21	11271.9	12129.3	14618.7	25732.4	14960.1	25874.5	7529.79	13222.4	12112.2	12043	12353.7	14766.4	26711.5	15330.5
581.118	13642.3	22962.7	6271.55	10653.9	10371.3	14043.6	24468	6826.94	11460.1	11229.2	14877	26699.3	7397.84	12487.8	11253.2	7166.18	11669	11863.5	15423.8	27417.6	16280.5	28336.3	7924.9	13208.7	11881.9	12818.6	12013.9	16397.3	27527	16847.5
580.083	13905.5	22898	6367.01	10523.9	10536	13951.6	23899.3	6764.15	10729.8	10580.4	15287.7	24884.4	6927.09	10774.2	10608.1	7259.38	11604.5	11480.8	16474	25314.7	15804.8	27160.3	7590.34	11352.1	11336.1	12255.4	12408.2	17812.9	27082.1	16561.3

## Sheet: 3.5 μmol L
1720.69	3224.51	3308.57	2332.81	1315.02	1155.9	1233.96	1348.05	1197.93	2891.25	1468.14	1191.93	1191.93	1227.96	1408.1	1414.1	1318.03	1936.51	1303.01	1651.28	1870.46	1378.07	1230.96	1372.07	1522.18	1251.97	1558.21	1152.9	2212.72	1720.34	1125.88
1719.86	3223.96	3311.01	2227.35	1377.84	1188.72	1239.75	1263.77	1269.77	2791.7	1428.87	1242.76	1212.74	1314.8	1368.83	1302.79	1290.79	1918.17	1326.81	1584.96	1852.13	1383.84	1299.79	1329.81	1443.88	1248.76	1479.9	1188.72	2155.31	1756.07	1239.75
1719.02	3139.38	3412.5	2196.96	1380.61	1116.49	1218.53	1278.56	1224.54	2815.23	1518.67	1212.53	1161.51	1323.58	1329.58	1380.61	1338.59	1977.87	1272.56	1644.72	1803.79	1335.59	1323.58	1338.59	1491.65	1257.55	1473.65	1146.5	2037.89	1761.77	1203.53
1718.19	3279.88	3324.89	2202.59	1362.37	1224.33	1248.34	1302.35	1278.34	2820.76	1389.37	1239.33	1182.32	1251.34	1368.37	1269.34	1350.36	1911.51	1338.36	1635.44	1782.48	1260.34	1317.35	1317.35	1692.45	1248.34	1476.4	1173.32	2070.56	1848.5	1182.32
1717.36	3141.31	3396.34	2298.23	1296.13	1134.11	1212.12	1254.12	1272.13	2802.28	1416.14	1272.13	1155.11	1170.12	1338.13	1368.14	1413.14	1995.2	1335.13	1653.16	1815.18	1320.13	1344.13	1263.13	1557.15	1284.13	1482.15	1155.11	2133.21	1734.17	1209.12
1716.52	3158.78	3338.76	2339.83	1346.9	1157.92	1307.91	1316.91	1325.91	2867.8	1478.9	1196.92	1235.91	1217.91	1301.91	1334.91	1349.9	1979.86	1331.91	1769.87	1850.87	1334.91	1397.9	1346.9	1487.89	1226.91	1529.89	1148.92	2036.86	1877.87	1184.92
1715.69	3149.24	3341.2	2267.45	1271.69	1136.73	1241.7	1154.72	1331.68	2894.3	1406.66	1196.71	1169.72	1205.71	1322.68	1409.66	1376.67	2156.48	1358.67	1589.62	1817.56	1403.66	1298.69	1349.68	1535.63	1298.69	1424.66	1157.72	2108.49	1817.56	1280.69
1714.86	3214.68	3343.63	2288.06	1415.42	1193.51	1217.5	1247.49	1328.45	2875.82	1496.39	1226.5	1157.52	1286.47	1322.46	1394.43	1340.45	1976.19	1304.46	1673.31	1865.23	1433.41	1304.46	1361.44	1505.38	1331.45	1472.4	1184.51	2138.12	1820.25	1232.49
1714.02	3196.14	3474.98	2407.6	1391.19	1160.33	1232.28	1259.27	1265.27	3022.25	1484.14	1241.28	1166.32	1262.27	1352.21	1340.22	1343.22	1918.89	1331.23	1646.04	1843.93	1367.21	1322.23	1310.24	1472.15	1322.23	1532.11	1283.25	2143.76	1837.93	1259.27
1713.19	3360.48	3327.5	2224.33	1411.94	1172.12	1322.01	1295.03	1328	2952.78	1450.91	1292.03	1208.09	1262.05	1337	1351.99	1366.97	1969.52	1387.96	1543.84	1921.56	1402.95	1220.08	1393.95	1588.81	1304.02	1456.91	1151.14	2095.43	1864.6	1217.09
1712.35	3278.98	3470.8	2394.8	1399.71	1183.91	1285.82	1327.78	1276.82	2964.27	1471.65	1300.8	1156.93	1261.84	1414.7	1360.75	1375.73	2002.16	1324.78	1618.51	1987.17	1306.8	1360.75	1426.69	1561.56	1372.74	1498.62	1258.84	2184.99	1876.27	1276.82
1711.52	3182.53	3377.32	2343.44	1357.52	1216.67	1285.6	1303.58	1291.59	2921.81	1534.33	1351.53	1156.74	1303.58	1300.58	1384.49	1369.51	1968.85	1417.45	1711.13	1759.08	1294.59	1303.58	1399.47	1492.37	1369.51	1534.33	1198.69	2247.55	1920.9	1276.61
1710.69	3415.69	3475.62	2358.03	1453.17	1168.53	1243.43	1273.39	1327.33	2984.24	1525.08	1327.33	1189.5	1315.34	1333.32	1381.26	1243.43	1983.5	1375.27	1668.9	1857.66	1399.24	1321.33	1324.33	1570.02	1357.29	1498.11	1150.55	2259.15	1842.68	1231.45
1709.85	3325.24	3439.08	2393.57	1369.04	1159.34	1318.11	1321.11	1237.23	2857.91	1470.9	1315.12	1309.13	1261.2	1452.92	1357.06	1357.06	1968.18	1300.14	1746.5	1884.3	1336.09	1300.14	1399	1554.78	1327.1	1491.87	1195.29	2046.07	1761.48	1321.11
1709.02	3300.71	3525.35	2411.14	1413.74	1177.12	1317.89	1252	1281.95	2974.24	1509.58	1344.85	1168.13	1344.85	1335.86	1407.75	1311.9	2084.66	1434.7	1722.24	1857.03	1386.78	1329.87	1362.82	1464.65	1314.89	1584.46	1198.08	2174.52	1776.16	1225.04
1708.18	3342.08	3488.82	2335.86	1401.52	1191.89	1326.65	1332.64	1344.62	3093.52	1497.35	1356.6	1251.78	1266.76	1362.59	1395.53	1338.63	2024.41	1350.61	1623.12	1874.68	1404.51	1428.47	1437.45	1566.23	1410.5	1524.3	1221.84	2198.11	1706.98	1266.76
1707.35	3497.21	3467.27	2446.25	1476.13	1278.52	1296.48	1329.42	1398.28	3095.99	1401.28	1332.41	1287.5	1359.36	1449.19	1356.37	1398.28	1991.13	1392.3	1685.73	1895.32	1473.14	1356.37	1359.36	1556.98	1377.33	1616.86	1275.52	2101.92	1895.32	1278.52
1706.51	3331.96	3367.89	2430.87	1380.09	1221.42	1329.19	1254.35	1311.23	3173.3	1508.81	1278.3	1188.49	1350.15	1374.1	1407.03	1335.18	2098.57	1320.21	1640.53	1903.98	1457.92	1380.09	1475.88	1571.68	1299.26	1532.76	1188.49	2278.19	1763.28	1230.4
1705.68	3534.93	3582.82	2400.52	1367.88	1257.13	1293.05	1322.98	1328.97	2921.33	1460.67	1370.87	1239.17	1355.91	1364.88	1412.78	1349.92	2119.16	1394.82	1673.18	1909.64	1454.68	1415.77	1403.8	1526.52	1337.95	1586.38	1143.39	2119.16	1816.85	1224.21
1704.84	3363.75	3546.3	2459.97	1403.56	1259.91	1313.78	1376.62	1259.91	3013.61	1541.22	1361.66	1179.11	1313.78	1430.49	1463.41	1382.61	2130.77	1394.58	1729.76	1885.38	1472.39	1334.73	1331.73	1586.11	1364.65	1562.17	1191.08	2157.71	1831.51	1334.73
1704.01	3527.75	3575.62	2438.6	1346.47	1256.7	1313.55	1418.28	1376.39	3084.91	1570.88	1382.37	1274.66	1271.66	1433.24	1445.21	1412.3	2043.64	1334.5	1639.7	1932.93	1406.31	1400.33	1481.11	1543.95	1391.35	1537.97	1292.61	2235.14	1831.2	1229.77
1703.17	3589.97	3524.15	2450.15	1486.85	1220.59	1280.42	1205.63	1307.35	3305.76	1504.8	1355.21	1304.36	1349.23	1406.07	1459.92	1441.97	2219.8	1424.02	1687.29	1956.53	1412.05	1370.17	1379.15	1573.6	1391.11	1528.73	1352.22	2264.67	1887.73	1232.56
1702.33	3646.19	3544.49	2428.8	1453.69	1232.35	1340.03	1408.82	1396.86	3185.56	1546.42	1402.84	1307.13	1369.94	1462.66	1408.82	1349	2096.78	1447.71	1722.89	1911.33	1480.61	1322.08	1459.67	1695.97	1411.81	1588.29	1286.19	2249.33	1872.45	1223.37
1701.5	3588.75	3573.8	2559.97	1396.62	1268.02	1417.56	1372.7	1402.6	3229.87	1653.82	1477.37	1271.02	1468.4	1411.57	1429.52	1372.7	2177.17	1399.61	1899.05	1988.77	1498.3	1336.81	1456.43	1611.95	1363.72	1617.93	1285.97	2254.93	1952.88	1250.08
1700.66	3650.93	3632.99	2448.9	1495.06	1240.9	1372.46	1366.48	1438.25	3229.33	1536.92	1444.23	1264.82	1444.23	1387.41	1396.38	1498.05	2161.85	1408.34	1797.06	1955.54	1495.06	1411.33	1477.12	1665.49	1429.28	1542.9	1276.78	2084.11	1865.83	1345.55
1699.83	3707.11	3751.96	2517.25	1485.83	1294.5	1243.68	1333.36	1411.09	3127.13	1578.51	1461.92	1312.44	1420.06	1470.89	1464.91	1488.82	2134.58	1366.25	1760.88	1949.22	1542.64	1378.21	1521.71	1641.29	1455.94	1620.37	1267.59	2227.26	1970.15	1339.34
1698.99	3757.3	3718.44	2546.71	1419.82	1300.26	1315.2	1348.08	1395.91	3213.28	1581.23	1530.42	1273.36	1342.11	1488.57	1467.65	1449.71	2041.55	1404.88	1823.35	1916.01	1524.44	1452.7	1449.71	1652.97	1443.73	1641.02	1348.08	2247.8	1871.18	1288.3
1698.15	3816.43	3750.68	2558.23	1416.59	1279.12	1326.93	1350.84	1386.71	3308.37	1563.03	1467.4	1201.41	1530.16	1455.44	1577.98	1434.52	2238.45	1425.56	1820.05	1990.4	1554.07	1464.41	1530.16	1718.44	1425.56	1551.08	1320.96	2172.71	1927.64	1377.74
1697.32	3908.41	3818.77	2566.76	1395.43	1254.99	1299.82	1482.09	1329.7	3230.12	1673.33	1583.68	1362.57	1440.26	1437.27	1511.97	1404.4	2136.48	1473.12	1837.67	2067.75	1410.37	1458.18	1500.02	1661.37	1508.98	1694.24	1344.64	2238.07	1969.15	1272.92
1696.48	4024.26	3752.39	2548.4	1365.32	1242.83	1344.41	1460.92	1395.2	3361.02	1646.15	1445.99	1254.78	1437.02	1416.11	1595.36	1475.86	2228.73	1440.01	1986.74	1935.95	1607.31	1454.95	1559.51	1631.22	1451.96	1592.38	1305.57	2339.27	1924	1362.33
1695.64	3939.94	3910.07	2592.77	1553.27	1287.43	1242.62	1436.78	1347.17	3255.9	1502.49	1583.14	1278.46	1544.31	1433.79	1601.07	1493.53	2102.89	1511.46	1929.64	1980.42	1642.89	1463.66	1433.79	1732.5	1499.51	1681.72	1418.86	2300.04	2016.27	1371.06
1694.8	4067.69	3999	2589.35	1460.43	1349.92	1403.68	1460.43	1427.57	3374.81	1553.01	1508.21	1311.1	1472.37	1484.32	1558.98	1460.43	2224.99	1454.45	1884.52	1950.22	1535.09	1529.12	1514.18	1648.58	1490.29	1645.59	1290.19	2338.47	1968.14	1349.92
1693.97	3899.78	4064.01	2523.21	1504.97	1334.76	1403.44	1507.96	1424.35	3439.93	1627.4	1534.83	1286.99	1594.55	1484.07	1585.59	1442.26	2329.12	1475.11	1893.16	2027.53	1654.27	1424.35	1549.76	1722.95	1478.09	1699.06	1430.32	2332.1	1884.2	1409.42
1693.13	4230.51	3857.32	2510.84	1459.93	1334.54	1358.42	1474.86	1474.86	3382.62	1656.98	1543.52	1313.64	1519.64	1450.97	1618.16	1474.86	2433.22	1495.76	1886.86	2033.15	1639.06	1439.03	1648.02	1761.47	1534.57	1677.87	1415.15	2349.62	1922.69	1465.9
1692.29	4119.35	4074.57	2558.17	1579.08	1304.46	1334.31	1429.83	1480.58	3429.8	1665.65	1585.05	1441.77	1525.35	1456.7	1596.99	1426.85	2358.18	1501.47	1922.36	2089.52	1596.99	1540.28	1522.37	1695.5	1459.68	1686.54	1364.16	2325.34	2056.69	1367.15
1691.46	4354.42	4038.06	2584.6	1528.08	1378.85	1390.79	1444.51	1492.26	3444.14	1719.09	1689.24	1334.08	1584.78	1483.31	1578.81	1635.52	2315.99	1563.89	1954.86	2092.15	1739.98	1498.23	1638.5	1731.02	1554.94	1698.2	1360.94	2435.37	2008.59	1408.7
1690.62	4368.6	4240.29	2611.02	1480.07	1375.63	1309.98	1477.09	1390.55	3556.95	1650.16	1584.51	1357.73	1506.93	1503.94	1560.64	1506.93	2303.66	1569.59	2014.21	2035.1	1617.34	1596.45	1530.8	1787.43	1471.12	1680	1414.42	2333.5	1951.55	1399.5
1689.78	4305.2	4111.28	2571.79	1494.74	1384.35	1405.23	1530.54	1500.71	3475.79	1649.88	1623.03	1351.53	1578.28	1545.46	1623.03	1494.74	2434.54	1602.14	1990	2115.31	1623.03	1527.56	1631.98	1772.2	1646.9	1733.42	1464.9	2210.78	1978.07	1342.58
1688.94	4388	4101.63	2654.87	1530.28	1384.11	1440.79	1503.43	1533.26	3558.72	1646.62	1640.65	1375.16	1569.06	1533.26	1589.94	1542.21	2365.52	1440.79	2043.36	2144.78	1670.48	1506.42	1655.57	1780.85	1598.89	1646.62	1437.81	2377.45	2007.56	1413.94
1688.1	4485.67	4273.91	2645.47	1538.97	1440.54	1383.88	1488.26	1449.49	3513.38	1744.76	1604.58	1342.12	1643.35	1595.63	1658.27	1530.02	2350.21	1458.44	2010.2	2132.48	1682.13	1580.72	1679.14	1795.46	1580.72	1711.95	1458.44	2397.93	2051.96	1452.47
1687.26	4526.66	4091.29	2785.18	1526.78	1410.48	1371.71	1637.11	1455.21	3596.28	1777.26	1714.64	1365.75	1634.13	1589.4	1687.8	1622.2	2412.43	1541.69	1968.11	2051.61	1687.8	1526.78	1574.49	1798.14	1583.43	1714.64	1532.74	2367.7	1929.35	1407.5
1686.43	4567.63	4355.94	2665.44	1520.55	1362.54	1407.26	1595.09	1562.29	3631.44	1776.96	1660.68	1428.13	1735.22	1475.83	1702.42	1633.85	2465.68	1493.72	2018.46	2131.76	1693.48	1621.92	1651.74	1720.31	1547.39	1773.98	1490.74	2417.98	1929.02	1434.09
1685.59	4724.84	4310.48	2656.05	1547.12	1448.75	1490.49	1597.8	1559.05	3654.67	1717.04	1684.25	1436.83	1758.77	1538.18	1645.5	1606.74	2405.64	1466.64	2107.55	2041.97	1717.04	1600.78	1728.96	1836.28	1639.53	1720.02	1544.14	2420.55	2047.93	1463.66
1684.75	4572.03	4485.6	2730.1	1624.35	1484.27	1487.25	1597.53	1549.84	3674.91	1806.16	1645.22	1373.99	1695.88	1683.96	1698.86	1528.98	2512.53	1505.13	1990.95	2142.95	1719.73	1615.41	1636.27	1853.85	1627.33	1749.53	1543.88	2488.69	2163.82	1442.54
1683.91	4758.99	4359.68	2816.06	1567.46	1418.46	1487	1579.38	1522.76	3692.17	1773.07	1734.33	1394.62	1731.35	1576.4	1716.45	1549.58	2518.06	1621.1	2056.17	2187.29	1784.99	1603.22	1606.2	1826.71	1674.74	1755.19	1487	2375.03	2082.99	1451.24
1683.07	4725.41	4338.08	2818.56	1582.09	1489.72	1513.56	1588.05	1543.35	3801.78	1772.77	1742.98	1430.14	1722.12	1477.81	1734.04	1596.98	2410.37	1599.96	2073.7	2130.31	1751.92	1665.51	1683.39	1829.38	1638.7	1814.48	1465.89	2490.82	2213.73	1459.93
1682.23	4876.53	4542.89	2803.18	1656.29	1477.56	1480.53	1543.09	1513.3	3747.51	1829.07	1846.94	1417.98	1715.87	1504.37	1727.79	1689.06	2538.06	1546.07	2159.73	2112.07	1748.64	1563.94	1599.69	1912.48	1712.89	1787.36	1537.13	2466.56	2150.8	1492.45
1681.39	4941.22	4625.51	2772.92	1617.29	1572.61	1423.69	1554.74	1638.14	3806.44	1712.6	1784.08	1367.1	1807.91	1533.89	1751.32	1623.25	2507.84	1581.55	2153.41	2096.82	1703.66	1626.23	1745.36	1870.46	1682.82	1843.65	1548.79	2394.66	2147.45	1450.5
1680.55	4970.16	4600.9	2829.03	1619.99	1506.83	1450.25	1590.21	1631.9	3913	1792.71	1885.03	1420.47	1736.13	1619.99	1768.89	1617.01	2462.75	1655.73	2173.89	2081.57	1756.98	1614.04	1718.26	1768.89	1718.26	1843.34	1655.73	2441.9	2126.24	1396.65
1679.71	4930.61	4567.36	2992.31	1583.99	1491.69	1476.8	1658.42	1539.33	3840.87	1741.79	1792.41	1497.64	1712.02	1572.08	1840.05	1682.24	2518.9	1595.9	2197.34	2158.63	1804.32	1563.15	1753.7	1863.86	1652.47	1697.13	1592.92	2450.42	2116.95	1351.75
1678.87	5084.57	4730.31	2801.27	1637.3	1553.95	1547.99	1649.21	1592.65	3968.22	1720.66	1854.62	1553.95	1786.15	1595.63	1809.96	1646.23	2640.52	1667.07	2107.65	2235.66	1795.08	1726.61	1792.1	1940.95	1687.91	1798.06	1613.49	2533.35	2116.58	1428.92
1678.03	5089.65	4610.45	2902	1589.4	1598.33	1520.94	1631.07	1529.87	4030.05	1860.25	1881.09	1410.82	1863.23	1657.86	1729.29	1660.83	2565.66	1648.93	2211.47	2095.39	1919.78	1678.69	1723.34	1904.9	1657.86	1815.61	1604.28	2541.85	2220.4	1479.27
1677.19	5127.47	4859.64	2937.21	1639.72	1508.78	1511.76	1726.02	1574.25	4026.39	1862.91	1845.06	1526.64	1830.18	1589.13	1842.08	1714.12	2696.16	1684.36	2178.36	2240.85	1851.01	1755.78	1824.23	1916.48	1764.71	1767.68	1627.82	2580.1	2175.38	1484.97
1676.35	5254.54	4742.77	2880.18	1582.91	1556.13	1532.33	1704.9	1565.06	3906.69	1889.37	1919.13	1502.57	1913.18	1588.86	1809.04	1764.41	2725.46	1621.59	2201.79	2240.47	1892.35	1669.19	1728.7	2032.19	1737.63	1856.64	1600.76	2540.98	2207.74	1451.99
1675.51	5366.69	4759.82	2977.86	1764.11	1538.02	1561.81	1677.83	1600.49	3953.62	1853.35	1874.18	1567.76	1924.75	1609.41	1889.05	1651.06	2617.9	1725.43	2198.44	2299.59	1850.38	1695.68	1776.01	1954.5	1728.41	1847.4	1603.46	2531.63	2192.49	1520.17
1674.67	5407.42	4901.77	2947.61	1707.29	1626.98	1543.7	1713.24	1570.47	4110.59	1858.99	1841.14	1508.01	1847.09	1624.01	1897.65	1757.86	2757.25	1704.32	2227.81	2251.6	1802.47	1638.88	1808.42	1969.04	1728.11	1888.73	1632.93	2543.09	2192.12	1573.45
1673.83	5537.35	4862.28	3009.56	1802.17	1555.33	1534.52	1596.97	1668.34	4056.36	1971.68	2046.02	1522.62	2016.28	1662.39	1935.99	1709.98	2724.07	1647.52	2280.96	2203.64	1834.88	1763.51	1796.22	1989.52	1793.24	2016.28	1680.24	2599.16	2319.62	1582.1
1672.99	5673.18	5022.01	3038.78	1718.6	1665.08	1465.87	1786.99	1668.06	4070.54	1855.38	1935.66	1558.04	1899.98	1641.3	1843.49	1751.31	2699.81	1697.79	2289.49	2331.12	1950.53	1697.79	1920.79	1995.13	1834.57	1894.03	1721.58	2667.11	2301.38	1537.23
1672.15	5594.92	5041.97	2963.94	1768.85	1623.18	1525.08	1718.31	1670.75	4096.6	1887.76	2149.38	1539.94	1938.3	1649.94	1878.85	1649.94	2755.84	1751.01	2318.83	2324.77	2051.27	1736.15	1866.95	2042.35	1831.28	1982.9	1733.18	2705.3	2298.02	1593.45
1671.31	5736.64	5055.97	3109.08	1723.96	1548.59	1566.43	1697.21	1762.6	4119.68	2006.34	2015.25	1542.65	1905.28	1667.49	1905.28	1712.07	2722.67	1694.24	2285.74	2264.93	1923.11	1709.1	1863.66	2071.73	1842.86	1884.47	1697.21	2663.23	2282.77	1506.98
1670.47	6009.07	5179.92	3117.46	1720.7	1688.01	1578.05	1753.39	1682.06	4136.81	1904.95	1940.61	1554.27	1887.12	1723.67	1896.04	1800.94	2751.93	1702.87	2401.25	2261.57	1994.11	1803.91	1854.43	1985.19	1854.43	1910.9	1789.05	2570.65	2326.95	1563.19
1669.63	5734.68	5104.76	3066.42	1773.89	1616.41	1595.61	1770.92	1637.21	4314.38	1928.4	2071.02	1503.5	1996.74	1738.23	1919.48	1785.77	2790.09	1729.32	2421.64	2249.3	1987.82	1776.86	1880.86	2056.17	1854.11	1934.34	1723.38	2724.72	2270.1	1485.67
1668.78	5911.95	5133.6	3054.01	1889.45	1693.37	1556.72	1726.05	1714.17	4263.14	1957.78	2052.84	1666.64	2002.34	1717.14	1942.92	1847.86	2825.26	1743.88	2367.75	2367.75	2026.11	1877.57	1931.04	2133.06	1975.6	1975.6	1818.15	2774.76	2314.28	1512.15
1667.94	6029.76	5257.47	3172.31	1716.85	1731.7	1544.57	1832.69	1734.67	4295.09	1987.15	2120.81	1598.03	1930.71	1702	1892.1	1734.67	2842.6	1835.66	2307.94	2236.65	2100.02	1797.05	1791.11	2097.05	1921.8	1898.04	1734.67	2685.17	2322.79	1586.15
1667.1	6049.52	5280.34	3153.95	1740.31	1585.88	1609.64	1841.29	1663.1	4273.57	2061.05	2090.75	1642.31	2069.96	1814.56	1989.78	1799.71	2764.9	1731.4	2464.95	2352.1	2066.99	1802.68	1859.11	2090.75	1799.71	1983.84	1823.47	2717.38	2280.82	1559.15
1666.26	6000.98	5484.32	3165.29	1745.96	1692.51	1597.49	1965.68	1695.48	4355.98	1846.91	2120.09	1579.67	2149.78	1707.35	2025.07	1719.23	2901.02	1737.05	2348.73	2327.94	1992.41	1840.97	1802.37	2090.4	1930.05	1843.94	1668.75	2713.95	2265.58	1603.43
1665.42	6249.34	5468.54	3152.87	1810.97	1686.28	1620.97	1769.41	1704.09	4423.52	2015.82	2131.6	1618	2137.54	1805.03	2030.66	1742.69	2864.9	1742.69	2475.98	2380.98	2101.91	1790.19	1879.25	2152.38	1914.88	1971.29	1840.66	2746.15	2288.95	1650.66
1664.57	6221.56	5455.73	3238.41	1875.97	1751.3	1662.25	1881.9	1730.52	4452.45	1982.82	2146.08	1659.28	2140.14	1730.52	1917.52	1778.01	2920.81	1760.2	2493.37	2291.53	2057.03	1864.09	1911.58	2131.24	1870.03	2018.44	1769.11	2772.39	2255.91	1534.61
1663.73	6250.17	5615.06	3220.06	1828.16	1706.48	1584.8	1946.87	1777.71	4359.69	1949.84	2083.39	1605.58	2160.55	1795.51	2101.2	1792.55	2964.83	1765.84	2507.79	2371.27	2027	1837.06	1991.39	2113.07	1979.52	2027	1798.48	2911.4	2308.94	1614.48
1662.89	6459.78	5533.99	3287.75	1875.33	1670.58	1590.47	1943.57	1774.44	4385.65	2020.72	2201.73	1697.29	2080.07	1804.11	1991.05	1780.37	2815.96	1768.5	2501.42	2424.27	2032.59	1857.52	1991.05	2353.06	1991.05	2041.49	1842.69	2836.73	2347.12	1599.37
1662.05	6286.61	5651.72	3290.16	1786	1694.03	1602.06	1934.34	1679.2	4364.13	2050.05	2192.45	1679.2	2121.25	1824.57	2055.98	1791.94	2931.18	1904.67	2495.06	2444.63	2142.02	1863.14	1946.21	2139.05	1952.14	1981.81	1830.5	2868.88	2352.66	1634.7
1661.2	6499.11	5635.92	3233.24	1821.29	1821.29	1601.79	1999.27	1850.96	4508.74	2011.13	2141.65	1670.01	2165.38	1767.9	1972.57	1827.23	2981.11	1836.12	2497.6	2393.78	2094.19	1865.79	1925.11	2198.01	1922.15	2037.83	1824.26	2871.35	2423.45	1554.33
1660.36	6589.94	5750.63	3324.63	1832.85	1726.08	1672.69	1915.89	1705.32	4416.03	2016.72	2230.26	1809.12	2126.46	1865.47	2102.73	1812.08	3004.32	1776.5	2568.36	2405.24	2218.4	1895.13	1963.34	2268.81	1865.47	2073.07	1877.33	2859	2366.68	1592.62
1659.52	6485.03	5672.55	3424.88	1838.46	1702.06	1696.13	2054.93	1793.98	4587.26	2004.52	2301.04	1814.74	2173.54	1912.59	2001.55	1734.68	2894.1	1740.61	2597.57	2464.13	2200.23	1882.94	1924.46	2256.57	1933.35	2013.41	1859.22	2766.59	2339.59	1675.37
1658.67	6501.71	5766.45	3394.65	1835.18	1698.81	1663.23	2001.21	1817.4	4500.5	2033.82	2288.79	1698.81	2110.91	1835.18	2084.22	1799.61	2991.44	1787.75	2626.77	2502.25	2090.15	1912.27	1986.39	2354.02	2084.22	1977.49	1915.23	2935.11	2383.66	1672.12
1657.83	6491.71	5747.68	3284.39	1977.16	1784.48	1630.34	1974.19	1710.37	4378.2	2057.19	2347.69	1781.51	2172.8	1870.44	2166.87	1867.48	2890.14	1790.41	2667.83	2451.44	2119.44	1769.66	2012.73	2270.62	1908.98	2054.23	1903.05	2783.43	2510.72	1645.16
1656.99	6386.87	5814.87	3313.47	1739.72	1757.5	1692.3	2030.17	1730.83	4454.51	2018.31	2365.07	1683.41	2273.19	1867.16	2080.55	1843.45	2987.46	1852.34	2608.1	2424.34	2157.61	1985.71	1932.36	2276.16	1953.11	2080.55	1861.23	2880.76	2341.36	1698.23
1656.14	6536.91	5665.71	3392.91	1902.4	1712.75	1594.22	1840.17	1890.55	4607.84	2059.45	2213.54	1763.13	2234.28	1902.4	2035.75	1801.65	2972.13	1816.47	2586.91	2447.64	2169.09	1926.11	1955.74	2195.76	1940.92	2121.68	1840.17	2877.31	2388.37	1641.63
1655.3	6455.8	5578.83	3368.63	1816.16	1759.86	1670.98	1985.03	1736.16	4447.06	1993.92	2233.9	1816.16	2189.46	1905.04	2014.66	1703.57	2939.03	1881.34	2687.2	2393.89	2192.42	1899.11	2026.51	2322.78	2032.44	2070.95	1813.19	2835.34	2464.99	1629.5
1654.46	6428.04	5648.97	3276.22	1904.71	1753.64	1809.92	1972.84	1753.64	4407.8	1987.66	2274.99	1804	2200.94	1771.41	2123.92	1922.49	2911.87	1735.87	2503.08	2357.93	2073.56	1916.56	2040.98	2242.41	1975.81	1984.69	1795.11	2677.85	2446.8	1596.64
1653.61	6379.55	5722.05	3311.21	1865.89	1670.41	1611.18	1913.27	1771.11	4516.63	1993.24	2262.76	1714.84	2188.71	1892.54	2016.93	1919.2	2955.8	1765.19	2496.73	2434.54	2129.48	1762.23	2005.09	2185.75	2055.44	2034.7	1759.26	2727.75	2363.45	1625.99
1652.77	6203.75	5564.13	3319.52	1756	1690.86	1693.82	2007.71	1687.89	4361.87	2034.36	2217.95	1717.51	2102.46	1818.19	2069.89	1744.16	2970.1	1708.62	2463.73	2514.07	2161.69	1883.33	1960.33	2220.91	1981.05	2087.66	1838.92	2724.32	2327.52	1649.4
1651.92	6338.88	5509.89	3372.25	1758.66	1809	1610.63	1880.05	1767.55	4449.95	1983.68	2170.2	1675.76	2048.81	1823.8	2007.36	1797.15	2848.2	1767.55	2478.12	2383.37	2161.32	1891.89	1965.91	2276.79	2001.44	2031.05	1809	2768.27	2341.92	1595.82
1651.08	6086.18	5458.62	3297.67	1870.85	1814.61	1636.99	1847.17	1681.4	4360.38	1974.46	2119.51	1711	2078.07	1829.41	1912.29	1787.96	2871.4	1755.4	2388.89	2300.08	2024.78	1770.2	1930.05	2205.35	1971.5	2072.14	1853.09	2764.83	2255.68	1672.52
1650.23	5943.08	5194.28	3214.24	1725.51	1704.79	1607.12	1897.17	1746.22	4270.85	1914.93	1962.28	1630.8	1962.28	1799.5	1956.36	1793.58	2734.76	1826.14	2509.83	2382.56	2000.76	1731.43	1894.21	2219.78	1956.36	1968.2	1766.94	2728.84	2350	1583.44
1649.39	5838.49	5264.41	3222.56	1740.01	1680.82	1586.13	1802.15	1686.74	4308.59	1938.27	1956.03	1651.23	2041.85	1813.99	2000.42	1645.31	2731.34	1876.13	2337.76	2302.25	2071.44	1834.7	1867.25	2222.36	1813.99	1929.4	1787.35	2757.97	2266.74	1645.31
1648.54	5908.51	5012.02	3136.21	1719	1733.79	1630.24	1795.93	1686.45	4222.05	1914.27	1991.2	1591.78	2074.04	1742.67	1852.14	1810.72	2837.38	1689.41	2372.87	2272.27	2059.25	1902.44	1952.74	2103.63	1881.73	1964.57	1843.26	2707.2	2301.86	1553.31
1647.7	5721.13	5114.7	3126.8	1715.75	1629.96	1615.17	1789.7	1665.46	4200.62	2064.81	2135.81	1635.88	1899.16	1745.33	1902.11	1783.79	2810.28	1807.45	2464.17	2271.89	1940.57	1766.04	1863.66	2103.27	1970.15	1928.74	1745.33	2688.99	2325.13	1511.63
1646.85	5430.3	4897.92	3120.35	1810.1	1629.68	1537.99	1780.52	1620.81	4173.29	1931.37	2099.95	1597.15	1957.98	1668.13	1839.68	1777.57	2741.77	1712.5	2342.48	2271.5	1960.94	1718.41	1881.08	2182.77	1801.23	1869.25	1762.78	2620.5	2292.2	1490.67
1646.01	5515.13	4923.7	3193.75	1735.86	1635.32	1620.53	1729.95	1626.45	4110.47	1892.59	1904.42	1599.83	1916.25	1759.52	1824.58	1647.15	2699.9	1691.5	2303.64	2291.81	1916.25	1718.12	1910.34	2117.34	1865.98	2028.62	1833.45	2637.8	2253.37	1658.98
1645.16	5449.14	4869.64	3264.16	1747.39	1567.04	1552.25	1738.52	1632.08	4050.64	1907.05	1992.8	1569.99	1859.75	1759.22	1803.57	1785.83	2672.83	1655.74	2276.64	2247.07	1910.01	1800.61	1818.35	1992.8	1818.35	1836.09	1640.95	2598.91	2309.16	1543.38
1644.32	5306.32	4889.5	3316.82	1726.4	1605.2	1578.59	1711.62	1652.5	4236.19	1806.22	1894.9	1498.78	1883.08	1714.58	1838.73	1673.19	2633.94	1815.09	2273.29	2293.98	1891.95	1785.52	1888.99	2007.24	1832.82	1894.9	1788.48	2648.72	2243.73	1587.46
1643.47	5199.01	4782.26	3177.34	1782.26	1625.61	1607.88	1732.02	1581.28	4102.46	1900.49	1950.74	1551.72	1785.22	1705.42	1832.51	1684.73	2671.92	1708.37	2199.01	2302.46	1974.38	1746.8	1717.24	1980.29	1800	1847.29	1646.3	2538.91	2193.1	1451.23
1642.62	5124.24	4559.81	3114.73	1708.08	1578.05	1495.31	1702.17	1637.16	4075.16	1849.93	1793.78	1474.62	1855.84	1613.51	1808.56	1675.57	2703.97	1687.39	2228.19	2364.12	1882.43	1684.44	1835.15	2015.42	1861.75	1926.76	1657.84	2644.86	2325.71	1557.37
1641.78	5073.14	4606.3	3167.39	1690.06	1563.01	1518.69	1598.47	1636.88	3870.59	1823.02	1873.25	1492.1	1716.65	1722.56	1882.11	1713.7	2783.28	1548.24	2115.53	2213.03	1911.66	1687.11	1781.65	1955.98	1763.93	1769.84	1633.92	2538.05	2227.81	1509.83
1640.93	5036.82	4658.69	3134.35	1698.63	1615.92	1524.34	1657.28	1482.98	3926.06	1846.34	1804.98	1524.34	1843.39	1624.78	1864.07	1716.36	2611.47	1627.73	2112.21	2280.6	1961.55	1719.31	1840.43	1890.65	1728.18	1760.67	1710.45	2649.87	2186.07	1550.93
1640.09	4935.53	4513.16	3083.6	1778.09	1609.73	1532.94	1704.25	1656.99	4014	1786.95	1813.54	1447.28	1739.69	1713.11	1778.09	1654.04	2643.51	1597.92	2170.93	2300.89	1875.56	1716.07	1766.28	1949.4	1721.97	1772.18	1580.2	2646.46	2253.63	1527.03
1639.24	4760.46	4612.8	3139.18	1659.66	1585.83	1562.21	1763.02	1647.85	4016.27	1804.37	1783.69	1547.44	1804.37	1760.07	1695.1	1695.1	2551.51	1633.08	2135.12	2223.71	1842.76	1709.87	1845.71	1910.68	1680.33	1822.09	1588.79	2480.63	2279.82	1538.58
1638.39	4845.27	4328.56	3088.45	1659.38	1511.75	1538.32	1736.15	1771.58	3856.14	1827.68	1839.49	1437.93	1603.28	1653.47	1765.67	1685.95	2447.73	1644.62	2114.08	2320.77	1795.2	1721.38	1762.72	1871.97	1818.82	1795.2	1573.75	2613.08	2137.71	1508.8
1637.55	4794.26	4581.7	3046.6	1688.62	1617.77	1526.25	1679.76	1614.81	3949.95	1915.93	1726.99	1526.25	1738.8	1632.53	1756.52	1703.38	2509.31	1591.2	2084.2	2225.9	1845.08	1635.48	1709.28	1839.18	1718.14	1812.61	1490.82	2642.15	2199.34	1573.48
1636.7	4749.16	4459.9	3143.48	1806.39	1466.96	1472.86	1647.01	1620.44	4020.11	1809.34	1788.68	1487.62	1679.47	1661.76	1812.3	1676.52	2547.25	1652.91	2131.07	2293.41	1765.07	1626.34	1788.68	1889.04	1717.84	1803.44	1611.59	2656.46	2122.22	1449.25
1635.85	4600.79	4491.6	3148.84	1661.48	1552.29	1513.92	1708.7	1528.68	3863.01	1835.6	1696.89	1493.27	1708.7	1561.14	1782.48	1685.09	2505.5	1649.68	2172.02	2278.26	1770.67	1629.02	1809.04	1817.89	1590.65	1850.35	1575.9	2656.01	2118.9	1446.05
1635	4647.22	4369.86	3310.59	1696.6	1599.23	1619.89	1613.99	1608.08	3791.54	1782.17	1761.52	1466.46	1740.86	1732.01	1749.71	1652.34	2496.22	1673	2130.34	2233.62	1764.47	1746.76	1649.39	1888.39	1652.34	1850.04	1596.28	2581.79	2168.7	1537.27
1634.16	4475.32	4416.31	3068.11	1743.52	1448.5	1525.21	1593.06	1531.11	3897.1	1716.96	1696.31	1457.35	1619.61	1625.51	1775.97	1607.81	2602	1690.41	2218.48	2109.33	1708.11	1696.31	1716.96	1923.47	1690.41	1761.22	1522.26	2551.85	2186.03	1528.16
1633.31	4654.48	4347.72	3091.19	1598.69	1516.1	1498.4	1675.38	1622.28	3822.69	1811.06	1734.37	1530.85	1672.43	1657.68	1731.42	1642.93	2457.02	1651.78	2153.21	2229.9	1837.6	1604.59	1725.52	1931.99	1648.83	1855.3	1575.09	2492.42	2182.71	1486.6
1632.46	4574.06	4346.98	3096.56	1595.46	1468.65	1557.13	1636.75	1563.02	3910.51	1849.09	1754.72	1530.58	1766.51	1627.9	1678.04	1689.84	2506.74	1663.29	2108.61	2173.49	1837.29	1698.68	1728.17	1866.78	1683.94	1784.21	1551.23	2509.69	2120.4	1474.55
1631.61	4517.25	4508.41	3096.03	1624.68	1489.04	1568.65	1565.71	1621.73	3850.87	1831.08	1739.67	1486.09	1695.44	1604.04	1716.08	1624.68	2565.28	1654.16	2055.17	2181.96	1704.29	1633.52	1665.96	1869.41	1663.01	1872.36	1556.86	2503.36	2111.2	1506.73
1630.77	4425.09	4395.61	3015.9	1733.48	1485.84	1506.48	1630.3	1530.06	3844.31	1786.54	1718.74	1435.72	1709.89	1624.4	1748.22	1627.35	2508.83	1606.71	2196.33	2196.33	1704	1642.09	1692.21	1860.25	1701.05	1774.75	1556.59	2438.07	2081.35	1556.59
1629.92	4400.75	4244.53	3047.81	1662.44	1503.27	1603.49	1641.81	1571.07	3873.13	1753.82	1650.65	1470.85	1671.28	1703.71	1694.86	1600.54	2499.56	1550.43	2163.53	2213.64	1753.82	1621.17	1700.76	1877.61	1706.65	1771.5	1600.54	2620.41	2299.12	1526.85
1629.07	4550.3	4426.52	3064.97	1656.26	1399.87	1494.17	1629.74	1662.16	3957.94	1812.46	1712.26	1411.65	1653.31	1573.74	1712.26	1650.37	2472.6	1632.69	2083.59	2133.69	1809.51	1703.42	1735.83	1918.55	1691.63	1762.36	1609.11	2581.65	2089.48	1632.69
1628.22	4546.57	4293.17	3017.3	1697.23	1535.17	1496.86	1623.57	1661.87	3842.34	1782.68	1614.73	1499.81	1661.87	1629.46	1770.9	1635.35	2531.11	1653.03	2112.7	2180.47	1753.22	1597.05	1623.57	1859.29	1741.43	1773.84	1585.26	2569.42	2168.68	1499.81
1627.37	4419.12	4345.46	3116.95	1723.46	1437.69	1543.74	1596.77	1673.37	3933.01	1779.43	1779.43	1446.52	1608.56	1590.88	1702.83	1632.13	2383.38	1534.91	2071.09	2197.77	1685.16	1576.15	1708.72	1861.92	1738.19	1803	1635.07	2645.58	2256.7	1517.23
1626.52	4374.18	4253.41	3098.74	1646.58	1466.9	1561.15	1572.94	1505.19	3805.68	1852.77	1737.89	1463.95	1655.41	1620.07	1737.89	1708.43	2477.23	1628.9	2064.85	2253.36	1732	1611.23	1729.05	1932.3	1667.19	1734.94	1555.26	2444.83	2038.34	1481.62
1625.67	4394.04	4326.31	3089.38	1546.16	1463.7	1622.73	1584.45	1702.25	3914	1814.16	1728.76	1487.26	1687.52	1534.38	1725.81	1593.28	2462.08	1619.79	2046.82	2079.22	1755.26	1681.63	1675.74	1870.12	1681.63	1802.38	1434.25	2653.51	2211.75	1504.93
1624.83	4475.74	4346.18	3065.29	1607.73	1457.56	1475.23	1681.35	1542.95	3854.44	1790.3	1704.9	1481.12	1716.68	1607.73	1657.79	1584.18	2517.6	1699.01	2093.59	2176.03	1763.8	1663.68	1672.51	1731.4	1657.79	1813.85	1560.62	2479.32	2117.14	1495.84
1623.98	4363.1	4366.04	3014.72	1592.74	1386.65	1539.74	1519.14	1554.46	3892.05	1769.38	1728.16	1469.09	1619.23	1633.95	1695.78	1628.07	2446.52	1533.86	2034.35	2216.88	1840.04	1654.56	1745.83	1842.98	1745.83	1834.15	1495.58	2561.33	2166.83	1525.02
1623.13	4368.24	4324.09	2999.49	1742.59	1471.78	1563.03	1545.37	1554.2	3859.01	1742.59	1701.38	1445.29	1724.93	1630.73	1719.04	1642.51	2387.23	1574.8	2054.6	2348.96	1719.04	1654.28	1707.26	1945.69	1607.18	1810.29	1545.37	2581.5	2210.61	1495.33
1622.28	4249.77	4441.07	3057.83	1668.71	1436.21	1556.88	1606.91	1645.17	3893.66	1812.92	1668.71	1447.39	1695.2	1636.34	1689.31	1595.14	2422.13	1574.53	2036.59	2116.06	1762.89	1659.88	1771.72	1883.56	1618.68	1839.41	1477.41	2498.65	2127.83	1498.02
1621.43	4369.69	4284.36	3113.22	1709.62	1477.16	1600.75	1712.56	1559.55	3931.25	1806.73	1771.42	1449.5	1703.74	1553.67	1627.23	1639	2477.63	1615.46	2145.12	2186.32	1797.9	1630.17	1721.39	1936.2	1741.99	1753.76	1456.56	2510	2280.48	1527.18
1620.58	4495.45	4448.38	3024.43	1759.34	1523.98	1491.62	1585.76	1632.84	3877.62	1791.71	1712.27	1451.6	1665.2	1612.24	1841.72	1632.84	2527.22	1582.82	2085.91	2197.71	1738.75	1644.6	1724.04	1947.64	1718.16	1791.71	1509.27	2491.91	2050.61	1526.92
1619.73	4588.81	4532.92	3012.14	1685.51	1591.38	1606.08	1682.56	1670.8	3906.37	1797.28	1829.64	1453.71	1682.56	1576.67	1753.16	1650.21	2570.91	1638.44	2088.5	2312.05	1785.52	1629.62	1747.28	1941.42	1673.74	1832.58	1544.31	2615.03	2179.68	1597.26
1618.88	4546.85	4352.74	2888.1	1611.69	1470.52	1555.81	1605.81	1582.28	3817.47	1935.21	1720.51	1455.82	1752.86	1599.93	1782.27	1635.22	2476.36	1638.16	2146.96	2255.78	1732.27	1688.16	1717.57	1902.85	1726.39	1773.45	1570.52	2535.18	2170.49	1544.05
1618.03	4590.18	4419.63	3155.2	1629.06	1464.39	1540.84	1476.15	1599.65	3946.2	1811.37	1811.37	1470.27	1637.88	1699.63	1779.03	1673.17	2443.59	1626.12	2081.9	2208.34	1879	1646.7	1749.62	1890.77	1720.21	1808.43	1579.07	2543.57	2193.64	1514.38
1617.18	4565.87	4374.77	2969.44	1658.18	1493.54	1614.08	1655.24	1643.48	4030.79	1858.1	1725.8	1472.96	1784.6	1652.3	1784.6	1555.28	2490.21	1581.74	2072.72	2205.03	1752.26	1587.62	1728.74	1863.98	1652.3	1787.54	1611.14	2593.11	2205.03	1472.96
1616.33	4544.52	4394.6	2933.65	1740.2	1458.01	1475.64	1599.11	1619.68	3853.73	1819.57	1831.33	1419.79	1652.02	1557.95	1793.11	1628.5	2525.06	1613.8	2116.46	2322.23	1751.96	1652.02	1678.47	1995.94	1707.87	1834.27	1675.53	2651.46	2204.65	1610.86
1615.48	4549.62	4393.85	3006.63	1716.39	1434.25	1490.09	1587.08	1566.5	3905.97	1825.14	1748.72	1422.49	1731.09	1645.86	1854.53	1634.1	2583.41	1675.25	2104.34	2298.32	1845.71	1751.66	1642.92	1810.44	1695.82	1831.01	1587.08	2568.71	2127.86	1598.83
1614.63	4466.56	4284.37	3073.7	1677.9	1483.96	1554.48	1622.07	1695.53	3949.38	1719.04	1789.56	1522.16	1698.47	1692.59	1748.42	1677.9	2580.03	1625	2103.98	2262.66	1730.79	1625	1816.01	1845.39	1619.13	1868.9	1580.93	2547.7	2171.57	1466.32
1613.77	4345.33	4360.02	2926.27	1745.19	1460.2	1554.21	1610.04	1586.53	3875.25	1836.26	1724.62	1501.33	1695.24	1642.35	1715.8	1571.84	2553.14	1592.41	2147.69	2256.4	1871.52	1680.55	1715.8	1942.03	1677.61	1792.19	1583.59	2523.76	2153.57	1545.4
1612.92	4497.34	4350.47	2987.46	1721.39	1445.26	1568.64	1645.01	1612.7	3912.78	1830.07	1762.51	1457.01	1624.45	1618.57	1739.01	1624.45	2567.39	1609.76	2088.58	2135.58	1888.82	1553.95	1747.82	1862.39	1680.26	1906.45	1600.95	2523.33	2247.2	1600.95
1612.07	4561.19	4396.71	2860.65	1726.97	1474.38	1536.06	1612.42	1533.12	3997.28	1747.52	1753.4	1471.45	1682.91	1677.04	1829.76	1671.16	2514.09	1585.99	2202.76	2114.65	1850.32	1706.41	1703.47	1920.81	1820.95	1876.75	1530.19	2446.53	2208.64	1518.44
1611.22	4337.23	4313.74	2901.28	1767.78	1491.75	1559.29	1573.97	1532.86	3896.75	1770.72	1735.48	1406.59	1711.99	1665	1841.19	1656.19	2516.59	1629.76	2076.11	2146.59	1817.7	1638.57	1800.08	1929.29	1720.8	1797.15	1556.35	2501.91	2281.67	1506.43
1610.37	4380.53	4307.13	2894.91	1749.86	1550.21	1476.81	1641.23	1644.17	3857.92	1767.48	1670.59	1423.97	1708.76	1556.09	1814.45	1664.72	2469.18	1652.97	2110.99	2366.42	1761.61	1658.85	1723.44	1864.37	1764.54	1823.26	1588.38	2548.46	2128.61	1570.77
1609.52	4464.91	4467.84	2991.28	1731.95	1450.14	1555.82	1552.88	1547.01	3977.61	1737.82	1687.92	1391.43	1702.59	1714.34	1767.18	1646.82	2539.21	1652.69	2093.02	2207.5	1899.27	1655.63	1696.72	1934.5	1682.05	1828.82	1479.5	2589.12	2201.63	1535.27
1608.67	4443.6	4399.57	2899.78	1805.03	1476.31	1543.81	1540.88	1684.69	3853.66	1802.09	1734.59	1490.98	1667.08	1655.34	1711.11	1596.64	2483.01	1620.12	2174.84	2292.24	1787.42	1693.5	1722.85	1816.77	1611.32	1893.08	1605.45	2553.45	2195.38	1529.14
1607.81	4554.35	4392.95	3034.28	1696.14	1543.55	1558.22	1702.01	1625.71	3899.95	1857.54	1772.44	1417.36	1687.34	1611.04	1787.11	1593.43	2561.82	1693.21	2192.07	2224.35	1892.75	1716.68	1790.05	1904.49	1769.5	1839.93	1496.6	2582.36	2212.61	1525.94
1606.96	4524.23	4365.79	3180.46	1739.86	1472.87	1508.08	1695.85	1599.03	3946.23	1798.54	1742.8	1508.08	1801.48	1643.04	1822.01	1654.78	2452.82	1692.92	2133.02	2229.84	1769.2	1637.17	1810.28	1915.9	1707.59	1848.42	1640.11	2573.12	2218.1	1563.82
1606.11	4535.19	4450.12	3024.44	1716.1	1510.75	1531.29	1607.56	1545.95	3878.08	1730.76	1760.1	1481.42	1683.83	1645.69	1745.43	1663.29	2540.41	1669.16	2238.26	2346.8	1845.17	1713.16	1748.36	1965.44	1739.56	1839.3	1519.55	2599.08	2164.92	1513.68
1605.26	4619.47	4572.54	3067.91	1721.67	1498.76	1545.69	1642.48	1607.28	3941.94	1794.99	1812.59	1551.55	1701.14	1689.4	1786.19	1639.54	2531.17	1701.14	2114.69	2270.14	1768.6	1627.81	1759.8	1874.18	1680.61	1830.19	1639.54	2607.43	2261.34	1621.95
1604.4	4533.63	4419.27	3102.58	1829.88	1469.18	1545.42	1636.33	1645.13	3947.13	1791.75	1780.02	1516.1	1721.37	1624.6	1736.04	1671.52	2586.46	1645.13	2155.38	2284.41	1838.67	1612.87	1768.29	1947.17	1648.06	1841.61	1650.99	2560.07	2120.19	1598.21
1603.55	4544.58	4500.6	3002.36	1644.85	1536.36	1574.48	1615.53	1647.78	3791.06	1835.43	1817.83	1498.25	1706.42	1647.78	1811.97	1680.03	2550.83	1641.91	2190.2	2228.31	1897	1662.44	1814.9	1984.96	1750.4	1776.79	1624.32	2521.51	2198.99	1674.17
1602.7	4435.34	4306.35	2922.69	1794.07	1480.4	1641.63	1591.8	1544.89	4089.42	1823.39	1697.33	1492.13	1741.3	1591.8	1770.62	1685.61	2576.78	1629.91	2160.51	2339.33	1723.71	1638.7	1797	1955.3	1691.47	1817.52	1559.55	2582.64	2216.2	1574.21
1601.85	4446.3	4270.45	2933.92	1702.9	1436.18	1594.46	1699.97	1603.25	3933.38	1817.21	1708.76	1474.29	1688.25	1629.63	1732.21	1729.28	2403.41	1647.21	2183.58	2136.69	1761.52	1647.21	1761.52	1984.28	1699.97	1773.25	1524.11	2585.13	2189.45	1480.15
1600.99	4331.25	4310.74	2898.25	1743.64	1491.62	1644	1579.53	1614.7	3815.49	1819.83	1734.85	1459.38	1635.21	1632.28	1746.57	1661.58	2546.59	1629.35	2074.78	2253.54	1723.12	1664.51	1696.75	1937.05	1699.68	1822.76	1529.71	2599.34	2218.38	1515.06
1600.14	4283.63	4348.09	2853.8	1746.27	1467.92	1561.68	1640.79	1614.42	3820.69	1784.36	1702.32	1459.13	1670.09	1629.07	1716.97	1632	2487.55	1599.77	2068.57	2168.19	1804.87	1670.09	1772.64	1971.88	1632	1813.66	1511.87	2575.45	2218	1482.57
1599.29	4227.24	4373.71	3034.94	1704.96	1438.37	1611.21	1655.16	1540.91	3884.49	1784.05	1707.89	1450.09	1617.07	1634.65	1713.74	1637.58	2528.14	1590.71	2138.52	2173.67	1734.25	1617.07	1707.89	1886.58	1608.28	1869.01	1535.05	2531.07	2126.8	1496.96
1598.43	4282.16	4372.96	2893.83	1602.15	1464.49	1473.28	1552.36	1549.43	3831.1	1824.75	1684.16	1443.99	1651.94	1643.16	1622.65	1646.08	2392.97	1672.45	2108.86	2226.02	1807.18	1690.02	1774.96	1956.56	1634.37	1889.19	1564.07	2580.43	2187.95	1505.49
1597.58	4269.72	4187.72	2902.12	1607.73	1429.1	1528.66	1660.44	1660.44	3757.23	1762.94	1727.8	1487.66	1625.3	1631.16	1701.44	1569.66	2506.77	1657.52	2175.86	2266.64	1824.44	1669.23	1774.66	1812.73	1622.37	1853.72	1560.88	2603.41	2117.29	1470.09
1596.73	4151.86	4295.34	2974.82	1657.23	1461.06	1540.11	1592.82	1563.54	3853.21	1704.08	1607.46	1490.34	1627.95	1622.1	1748	1598.67	2529.77	1668.94	2032.01	2114	1674.8	1704.08	1695.3	1853.41	1604.53	1824.13	1481.55	2594.18	2149.13	1466.91
1595.87	4236.05	4236.05	2865.99	1683.3	1493.01	1545.7	1560.34	1627.67	3770.58	1826.74	1686.22	1463.74	1604.25	1630.6	1712.57	1668.66	2412.24	1577.91	2084.36	2227.8	1747.7	1592.54	1724.28	1894.07	1680.37	1750.63	1493.01	2526.41	2099	1522.28
1595.02	4273.37	4176.78	2874.28	1653.74	1486.9	1533.73	1601.05	1592.27	3843.11	1677.15	1668.37	1475.19	1662.52	1647.88	1732.77	1633.25	2438.16	1639.1	2057.66	2326.94	1794.23	1621.54	1677.15	1920.09	1647.88	1808.87	1551.29	2534.75	2095.71	1483.97
1594.16	4214.11	4237.52	2797.7	1700.28	1425.19	1507.13	1682.72	1612.48	3810.26	1820.26	1682.72	1524.69	1624.19	1615.41	1770.51	1580.29	2569.44	1624.19	1975.37	2153.88	1729.54	1615.41	1647.6	1943.17	1673.94	1814.41	1539.32	2519.69	2148.03	1533.47
1593.31	4178.28	4113.91	2820.63	1656.1	1395.69	1521.5	1501.02	1512.72	3710.12	1890.17	1653.17	1544.91	1656.1	1647.32	1714.62	1612.21	2481.22	1544.91	2068.66	2226.66	1881.4	1632.69	1755.58	1849.21	1659.02	1770.21	1486.39	2677.26	2141.81	1574.17
1592.45	4233.15	4309.21	2966.42	1644.11	1415.92	1538.79	1632.41	1535.87	3923.05	1769.91	1644.11	1480.28	1573.9	1641.18	1679.22	1620.71	2594.89	1702.62	2129.74	2229.2	1734.8	1579.75	1734.8	1936.66	1614.86	1837.19	1512.46	2553.93	2205.8	1509.54
1591.6	4124.2	4220.72	2977.61	1608.73	1409.83	1535.6	1684.78	1626.28	3814.15	1769.6	1722.8	1512.21	1576.55	1576.55	1693.55	1611.65	2442.34	1561.93	2187.87	2120.6	1719.88	1635.05	1678.93	1895.38	1632.13	1778.38	1614.58	2456.97	2135.22	1529.75
1590.74	4222.92	4372.07	2936.16	1696.19	1371.57	1500.25	1535.34	1549.96	3886.61	1766.37	1599.68	1517.79	1640.62	1628.92	1696.19	1713.73	2474.09	1684.49	2061.74	2243.06	1652.32	1628.92	1766.37	1845.33	1655.24	1757.6	1579.21	2591.07	2102.69	1497.32
1589.89	4195.88	4116.93	2909.34	1795.31	1423.97	1596.48	1663.73	1660.81	3736.82	1853.79	1652.04	1482.45	1614.03	1672.5	1739.76	1625.72	2333.32	1573.09	2096.48	2268.99	1789.46	1634.49	1654.96	1897.65	1748.53	1833.32	1543.85	2543.84	2073.09	1520.46
1589.03	4236.09	4116.23	2902.99	1660.52	1461.73	1499.73	1666.37	1637.14	3826.81	1710.22	1727.76	1520.2	1616.67	1660.52	1604.98	1599.13	2493.71	1631.29	2023.03	2201.36	1786.23	1622.52	1759.92	1873.94	1645.91	1841.78	1508.5	2534.64	2099.04	1531.89
1588.18	4138.9	4214.9	2987.26	1707.01	1470.25	1631.01	1540.4	1601.78	3720.92	1832.69	1747.93	1473.17	1689.47	1593.01	1721.62	1663.16	2437.74	1575.47	2063.61	2209.75	1797.62	1625.16	1750.85	1905.77	1563.78	1844.38	1555.01	2522.51	2154.22	1519.94
1587.32	4243.4	4348.61	2957.52	1753.47	1446.61	1645.34	1648.26	1569.36	3983.3	1879.14	1773.93	1531.37	1601.5	1639.5	1706.71	1583.97	2522.08	1709.64	2039.87	2317.51	1759.32	1697.95	1803.15	1958.04	1657.03	1741.78	1540.13	2557.15	2282.44	1537.21
1586.47	4216.38	4359.55	2886.89	1729.8	1516.49	1572.01	1542.79	1592.46	3801.46	1834.99	1753.17	1510.65	1697.65	1615.84	1747.33	1610	2495.35	1753.17	2173.93	2226.53	1797	1656.75	1770.7	1934.33	1721.03	1887.58	1580.78	2588.85	2165.17	1545.71
1585.61	4344.2	4274.08	2825.04	1738.26	1449.04	1545.45	1603.88	1627.25	3952.72	1837.59	1758.71	1431.51	1703.21	1633.09	1685.68	1773.32	2591.33	1685.68	2126.82	2305.03	1732.42	1665.23	1700.28	1939.84	1758.71	1808.38	1554.21	2582.56	2220.3	1612.64
1584.76	4401.87	4439.84	2882.98	1737.97	1536.42	1510.13	1723.36	1664.94	3864.42	1878.17	1761.33	1410.82	1629.89	1726.28	1775.94	1597.76	2614.25	1647.42	2190.71	2202.4	1848.96	1694.15	1767.17	1895.7	1694.15	1860.65	1586.08	2552.91	2199.48	1527.66
1583.9	4404.04	4439.08	2923.37	1717.22	1463.14	1495.27	1609.17	1638.37	3898.8	1874.93	1790.24	1477.75	1682.18	1711.38	1848.64	1600.41	2625.48	1711.38	2134.85	2324.68	1816.52	1734.75	1831.12	1898.29	1743.51	1743.51	1504.03	2602.12	2172.81	1591.64
1583.04	4341.96	4195.96	2937.47	1728.61	1430.77	1617.65	1652.69	1681.89	4096.69	1807.45	1781.17	1410.33	1661.45	1652.69	1778.25	1722.77	2744.75	1597.21	2119.88	2166.6	1775.33	1658.53	1813.29	1880.45	1731.53	1950.53	1565.09	2657.15	2201.64	1591.37
1582.19	4265.31	4364.57	2919.45	1795.46	1503.52	1623.21	1626.13	1617.37	4066.79	1836.33	1687.44	1448.05	1585.26	1696.2	1690.36	1696.2	2633.34	1672.84	2072.81	2288.85	1786.7	1737.07	1734.15	1973.55	1783.78	1812.98	1497.68	2519.48	2233.38	1567.74
1581.33	4378.42	4217.88	2997.76	1745.53	1441.96	1602.5	1614.18	1666.72	4054.42	1780.56	1812.67	1555.8	1620.01	1719.26	1739.69	1774.72	2612.46	1695.91	2162.94	2285.53	1742.61	1678.39	1707.58	2005.32	1754.29	1757.21	1558.72	2635.81	2276.78	1535.37
1580.47	4339.73	4304.71	2959.3	1695.62	1552.61	1596.39	1707.29	1631.41	3899.04	1867.8	1745.23	1540.94	1640.17	1610.98	1733.56	1681.02	2533.21	1681.02	2185.92	2296.82	1756.9	1736.47	1774.41	1999.13	1742.31	1876.56	1573.04	2658.7	2238.45	1517.59
1579.62	4336.06	4295.21	2964.63	1724.5	1534.84	1581.53	1645.72	1654.47	4026.76	1908.34	1829.55	1540.67	1686.57	1704.08	1879.16	1750.77	2497.76	1695.33	2153.44	2258.49	1812.04	1657.39	1771.19	1873.32	1677.82	1914.17	1709.92	2585.3	2255.57	1526.08
1578.76	4437.43	4411.17	2873.68	1811.73	1371.2	1648.36	1578.34	1622.1	3985.23	1759.22	1718.37	1470.39	1765.05	1700.87	1808.81	1686.28	2605.28	1703.79	2155.99	2310.61	1797.14	1776.72	1782.56	1951.77	1773.81	1931.35	1555	2506.08	2301.86	1578.34
1577.9	4290.82	4468.76	2896.52	1712.24	1487.64	1580.98	1677.24	1642.24	3920.37	1828.92	1729.75	1490.56	1793.92	1697.66	1846.42	1715.16	2528.99	1802.67	2146.87	2216.88	1750.17	1656.82	1756	1878.51	1750.17	1828.92	1575.15	2648.58	2237.29	1513.89
1577.05	4395.08	4432.99	2884.36	1714.87	1487.39	1560.3	1639.04	1598.21	4042.19	1840.27	1697.37	1449.47	1729.45	1665.29	1790.69	1703.2	2429.4	1682.79	2193.16	2303.99	1828.61	1711.95	1811.11	1921.93	1773.2	1889.85	1633.21	2554.8	2172.75	1566.13
1576.19	4490.55	4487.63	2810.97	1702.91	1487.13	1574.61	1606.68	1702.91	4093.98	1752.48	1848.71	1592.1	1717.49	1679.58	1977.01	1699.99	2493.13	1691.25	2163.63	2227.78	1799.14	1804.97	1807.88	1874.95	1743.73	1837.04	1583.36	2583.52	2210.28	1536.7
1575.33	4574.33	4294.44	2892.12	1679.29	1553.93	1623.9	1644.31	1600.58	3947.51	1854.22	1784.25	1478.13	1638.48	1688.04	1696.79	1673.46	2720.11	1699.7	2218.65	2332.35	1854.22	1717.19	1778.42	1897.95	1702.62	1941.68	1606.41	2524.77	2206.99	1562.68
1574.47	4308.28	4410.3	2836.24	1754.79	1542	1568.24	1696.49	1652.77	3865.21	1786.86	1763.54	1626.54	1713.98	1679.01	1804.35	1693.58	2673	1778.11	2200.78	2326.12	1833.5	1711.07	1824.75	1961.75	1821.84	1798.52	1690.66	2766.28	2279.48	1606.13
1573.62	4435.78	4406.63	2899.87	1739.92	1480.53	1588.37	1739.92	1632.09	3905.35	1882.73	1769.06	1559.22	1734.09	1748.66	1789.47	1707.86	2596.76	1661.23	2168.34	2343.21	1929.36	1702.03	1949.76	2010.96	1792.38	1879.81	1594.2	2526.82	2279.09	1629.17
1572.76	4537	4318.46	2852.75	1783.33	1509.42	1599.75	1649.29	1506.51	3997.92	1824.13	1806.64	1506.51	1733.79	1707.57	1803.73	1663.86	2520.56	1681.34	2147.57	2290.36	1789.16	1628.89	1792.07	2022.27	1739.62	1949.42	1643.46	2581.75	2211.68	1608.49
1571.9	4396.38	4410.94	2863.91	1724.76	1506.25	1631.53	1669.4	1660.66	3895.27	1756.8	1855.86	1552.86	1742.24	1649.01	1812.16	1710.19	2590.05	1765.54	2252.09	2295.79	1838.38	1666.49	1803.42	1995.7	1745.15	1954.92	1616.96	2616.27	2196.73	1660.66
1571.04	4424.75	4328.62	2872.16	1788.54	1401.12	1587.55	1721.55	1610.85	4121.81	1910.89	1791.46	1476.86	1756.5	1782.72	1808.93	1666.2	2537.17	1704.07	2254.61	2324.52	1759.41	1840.98	1840.98	1922.54	1718.63	1931.28	1570.07	2642.03	2254.61	1625.42
1570.18	4397.78	4269.63	2860.01	1770.76	1462.04	1485.34	1625.14	1622.23	3992.95	1878.52	1762.02	1485.34	1767.85	1718.34	1878.52	1633.88	2557.12	1671.74	2134.82	2332.86	1840.66	1741.64	1916.38	1930.95	1671.74	1869.78	1613.49	2644.49	2140.64	1529.03
1569.32	4370.82	4385.38	2973.09	1720.95	1508.38	1511.3	1645.24	1624.86	4035.94	1849.08	1828.7	1508.38	1770.46	1729.69	1814.14	1718.04	2504.27	1691.84	2207.25	2268.4	1916.05	1773.37	1741.34	1939.35	1747.16	1811.22	1566.62	2539.21	2207.25	1476.35
1568.47	4320.57	4396.27	2882.32	1662.43	1528.5	1572.18	1671.16	1676.99	3971.2	1959.4	1808	1499.39	1767.24	1621.67	1828.38	1749.77	2535.86	1703.19	2166.11	2285.48	1851.67	1644.96	1790.53	2023.45	1749.77	1872.05	1569.26	2594.09	2201.05	1598.38
1567.61	4410.07	4474.11	2922.58	1682.52	1443.82	1536.97	1670.88	1560.26	4069.49	1886.29	1819.34	1502.04	1598.1	1601.01	1793.14	1624.3	2590.73	1679.61	2168.65	2253.06	1874.64	1755.29	1656.32	1903.75	1633.04	1912.49	1534.06	2712.99	2255.98	1615.57
1566.75	4272.52	4202.67	2855.14	1725.89	1493.05	1589.1	1574.55	1574.55	3955.28	1877.23	1743.35	1548.35	1699.69	1676.41	1685.14	1749.17	2590.29	1679.32	2057.68	2214.84	1853.95	1720.07	1772.46	1868.5	1696.78	1920.89	1594.92	2540.81	2182.83	1583.28
1565.89	4338.71	4455.11	2956.5	1748.87	1542.27	1620.83	1632.47	1705.22	4059.36	1932.2	1847.81	1571.37	1745.96	1711.04	1757.6	1673.21	2659.68	1777.97	2138.8	2231.92	1833.26	1711.04	1841.99	1908.92	1728.5	1888.55	1580.1	2677.14	2293.03	1553.91
1565.03	4343.79	4413.61	2874.52	1748.57	1530.36	1571.1	1626.37	1670.02	3997.57	1847.49	1620.56	1454.72	1777.67	1597.28	1754.39	1594.37	2548.67	1699.11	2164.62	2333.37	1899.86	1693.29	1760.21	1931.87	1707.84	1920.23	1562.37	2641.77	2193.71	1591.46
1564.17	4343.04	4223.78	2810.03	1751.18	1486.47	1617.37	1658.09	1710.45	4052.15	1812.27	1725	1466.1	1716.27	1704.64	1730.82	1739.54	2484.23	1655.18	2193.34	2312.6	1739.54	1710.45	1719.18	1902.44	1678.46	1826.81	1544.65	2740.22	2245.7	1544.65
1563.31	4368.47	4415.01	2986.96	1698.53	1497.84	1602.55	1701.44	1617.09	3990.37	1794.51	1689.8	1471.67	1675.26	1657.81	1797.41	1721.79	2571.06	1660.72	2102.8	2274.4	1820.68	1654.9	1875.94	1957.38	1715.98	1875.94	1672.35	2579.78	2184.24	1590.91
1562.45	4239.77	4315.38	2861.41	1753.49	1532.48	1622.63	1602.27	1704.05	3925.71	1817.46	1785.47	1485.96	1619.72	1744.76	1747.67	1709.87	2637.5	1738.95	2218.76	2271.1	1817.46	1686.6	1773.84	1948.32	1666.25	1858.17	1596.46	2614.23	2230.39	1704.05
1561.59	4084.95	4358.25	2933.6	1750.28	1546.76	1622.35	1668.87	1703.76	3983.19	1854.94	1747.37	1474.07	1756.09	1665.96	1802.61	1744.46	2590.53	1727.02	2067.19	2238.73	1825.87	2113.71	1808.43	1907.28	1677.59	1886.93	1581.65	2613.79	2247.45	1575.83
1560.73	4197.62	4418.54	2834.26	1749.98	1499.98	1648.23	1680.21	1671.49	4063.9	1796.49	1779.05	1479.63	1639.51	1691.84	1808.11	1558.12	2470.9	1654.05	2087.18	2345.9	1811.02	1674.4	1857.53	1866.25	1627.88	1831.37	1642.42	2712.17	2276.13	1543.58
1559.87	4324.78	4278.28	2909.34	1729.33	1479.38	1604.35	1650.86	1598.54	4013.79	1755.49	1723.52	1485.19	1697.36	1688.64	1799.08	1720.61	2470.47	1740.96	2049.04	2243.77	1816.52	1796.18	1793.27	1976.38	1656.67	1854.31	1554.94	2548.95	2249.58	1639.23
1559.01	4387.97	4263.01	2873.97	1795.87	1482.03	1598.27	1682.54	1650.57	3995.66	1822.02	1711.6	1455.87	1758.09	1705.79	1784.25	1717.41	2560.13	1708.69	2112.62	2304.41	1897.58	1673.82	1763.9	1915.01	1679.63	1897.58	1563.39	2600.81	2211.42	1699.97
1558.15	4340.72	4282.62	2858.95	1751.98	1548.6	1714.21	1650.29	1635.76	3997.88	1882.72	1676.44	1484.68	1682.25	1667.72	1830.43	1751.98	2553.88	1667.72	2152.93	2254.62	1720.02	1740.36	1798.47	1914.68	1746.17	1871.1	1513.73	2600.37	2237.19	1583.46
1557.29	4154.06	4389.36	2899.13	1847.54	1522.19	1623.86	1708.1	1644.2	4101.77	1818.49	1725.53	1498.95	1728.44	1757.49	1783.63	1679.05	2634.78	1742.96	2172.89	2321.05	1856.26	1789.44	1873.69	1969.55	1745.87	1992.79	1554.14	2582.49	2297.81	1568.67
1556.43	4426.36	4519.31	3009	1707.81	1510.31	1626.49	1655.53	1574.21	4194.01	1826.89	1757.19	1588.73	1722.33	1748.47	1803.66	1780.42	2506.53	1748.47	2204.47	2294.51	1858.84	1719.43	1783.33	2006.97	1728.14	1940.17	1629.39	2634.33	2230.61	1632.29
1555.57	4280.41	4440.12	2982.35	1809.15	1539.09	1646.53	1719.13	1681.38	4158.44	1855.62	1806.25	1576.84	1727.84	1722.04	1844	1762.69	2561.27	1797.54	2157.63	2337.67	1875.94	1739.46	1814.96	2035.66	1753.98	1919.5	1629.11	2683.24	2180.86	1733.65
1554.71	4375.48	4410.33	2929.57	1858.2	1512.69	1730.45	1759.48	1715.93	4111.27	1829.17	1707.22	1498.17	1710.13	1747.87	1861.1	1739.16	2676.97	1689.8	2299.52	2392.43	1843.68	1797.23	1814.65	1991.76	1768.19	1884.33	1640.44	2624.71	2311.14	1681.09
1553.85	4241.2	4514.07	2879.72	1738.86	1555.98	1643.06	1695.32	1683.71	4084.44	1837.56	1709.83	1526.95	1831.76	1704.03	1875.3	1704.03	2548.78	1643.06	2055.28	2313.64	1802.73	1796.92	1808.53	2026.25	1767.89	1907.23	1579.2	2722.96	2241.07	1669.19
1552.98	4411.71	4388.49	2957.59	1767.59	1576.03	1755.98	1706.64	1639.88	4220.15	1834.34	1700.83	1506.37	1770.49	1654.39	1930.12	1680.51	2583.17	1689.22	2202.95	2263.9	1840.15	1712.44	1837.25	2066.54	1770.49	1950.44	1619.56	2699.27	2214.56	1686.32
1552.12	4335.5	4350.01	2814.88	1813.71	1549.64	1665.71	1662.81	1709.24	4074.33	1874.65	1639.6	1558.34	1657.01	1686.03	1720.85	1726.66	2608.85	1732.46	2240.3	2295.44	1813.71	1752.77	1761.48	2048.77	1720.85	1987.83	1604.77	2600.14	2278.02	1668.62
1551.26	4366.67	4320.25	2875.33	1764.08	1465.23	1636.41	1642.22	1607.4	4082.33	1810.5	1723.46	1555.17	1679.94	1659.63	1810.5	1627.71	2643.21	1720.56	2173.18	2231.21	1880.13	1769.88	1781.49	1978.78	1720.56	1929.46	1537.76	2660.62	2222.51	1621.91
1550.4	4403.63	4296.3	2947.36	1731.86	1447.57	1697.05	1624.53	1676.75	4052.62	1856.6	1792.78	1607.12	1731.86	1685.45	1746.37	1728.96	2532.52	1723.16	2149.6	2332.36	1813.09	1697.05	1749.27	1978.44	1798.59	1932.03	1592.62	2639.86	2358.47	1583.92
1549.54	4339.07	4370.97	2941.05	1754.77	1519.83	1618.45	1667.76	1566.24	3930.1	1835.98	1632.95	1473.43	1734.47	1682.26	1795.38	1757.67	2485.68	1705.46	2207.24	2346.46	1804.08	1786.67	1844.68	1986.8	1847.58	1952	1612.65	2677.11	2192.74	1647.45
1548.68	4384.72	4323.82	2781.05	1812.47	1560.17	1716.77	1795.07	1702.27	3906.23	1882.06	1780.57	1525.37	1650.07	1722.57	1824.07	1739.97	2575.15	1725.47	2128.56	2343.16	1826.97	1710.97	1818.27	2018.36	1812.47	1870.46	1661.67	2676.65	2244.56	1638.47
1547.81	4363.67	4369.47	2777.67	1742.57	1429.43	1580.2	1722.27	1658.48	4053.43	1878.84	1745.47	1525.11	1681.68	1716.47	1858.55	1757.06	2554.41	1693.28	2087.6	2397.84	1791.86	1701.98	1768.66	2015.12	1757.06	1925.23	1504.81	2745.78	2322.46	1586
1546.95	4249.86	4403.5	2933.74	1739.37	1490.06	1559.63	1713.28	1672.69	3988.95	1916.2	1681.39	1565.43	1684.29	1629.21	1811.84	1672.69	2553.97	1707.48	2084.34	2269.88	1782.85	1695.88	1791.55	1953.89	1684.29	2023.47	1626.31	2568.47	2261.18	1577.03
1546.09	4170.87	4394.05	2857.87	1724.58	1533.28	1518.79	1646.32	1597.05	3898.41	1918.77	1814.43	1524.58	1707.19	1681.1	1724.58	1730.37	2414.41	1736.17	2231.81	2298.47	1724.58	1686.9	1808.63	1970.95	1750.66	1973.84	1655.01	2660.78	2254.99	1565.16
1545.23	4349.82	4312.15	2929.83	1715.59	1498.24	1692.4	1692.4	1564.89	4042.64	1880.77	1672.12	1530.12	1814.12	1761.95	1825.71	1747.46	2625.54	1738.77	1990.89	2240.12	1732.97	1672.12	1730.08	1947.42	1770.65	1843.1	1541.71	2637.13	2327.05	1588.08
1544.36	4230.28	4317.2	2836.6	1721.09	1445.83	1555.93	1721.09	1648.65	4041.94	1831.19	1686.32	1564.62	1741.37	1750.06	1764.55	1738.47	2543.96	1712.39	2034.01	2341.14	1834.09	1747.16	1747.16	1978.96	1654.44	1921.01	1515.37	2720.71	2262.91	1509.57
1543.5	4160.02	4273.01	3024.42	1749.76	1491.93	1474.55	1720.79	1709.2	3855.84	1813.49	1712.1	1512.21	1752.66	1735.27	1752.66	1752.66	2627.54	1674.44	2169.82	2349.43	1845.36	1659.95	1758.45	1926.47	1723.69	1932.27	1515.11	2615.95	2137.95	1596.22
1542.64	4278.06	4388.13	2800.87	1743.67	1416.37	1668.36	1668.36	1587.26	3953.66	1862.42	1697.32	1517.74	1601.74	1697.32	1763.94	1694.43	2624.19	1636.5	2091.24	2331.65	1758.15	1711.8	1766.84	1859.52	1656.77	1917.45	1503.26	2737.15	2209.99	1532.22
1541.77	4097.78	4361.31	2962.56	1734.68	1485.63	1676.76	1636.21	1639.11	3900.85	1983.73	1633.32	1416.12	1691.24	1752.05	1778.12	1650.69	2513.69	1691.24	2212.51	2290.7	1801.28	1653.59	1752.05	2061.92	1850.52	1948.98	1558.02	2632.42	2221.2	1607.26
1540.91	4233.16	4233.16	2901.25	1737.27	1459.31	1604.08	1664.89	1627.25	3850.96	1986.28	1670.68	1485.37	1728.59	1751.75	1731.48	1745.96	2568.27	1667.78	2021.03	2267.14	1809.66	1664.89	1763.33	2035.51	1806.77	1864.67	1554.86	2713.04	2258.46	1569.34
1540.05	4220.85	4293.22	2822.58	1783.29	1406.95	1647.23	1655.92	1600.91	3879.24	1855.67	1699.34	1571.96	1661.71	1681.97	1835.4	1650.13	2478.08	1650.13	2165.43	2318.86	1713.82	1734.08	1716.71	1956.99	1595.12	1948.31	1586.44	2585.2	2275.44	1606.7
1539.18	4081.19	4289.59	2882.88	1762.73	1505.12	1707.73	1713.52	1612.21	3849.63	1843.77	1646.95	1502.22	1725.1	1661.42	1809.04	1687.47	2552.91	1745.36	2139.01	2324.25	1835.09	1646.95	1727.99	1861.14	1710.63	1901.66	1528.27	2694.74	2249	1655.63
1538.32	4080.49	4242.55	2948.95	1721.91	1519.33	1617.72	1643.77	1672.71	4048.65	1800.04	1658.24	1496.18	1594.57	1753.74	1747.95	1690.07	2572.73	1669.82	2153.11	2404.88	1852.14	1655.35	1701.65	1956.32	1739.27	1898.44	1542.48	2601.67	2268.87	1600.36
1537.45	4192.63	4276.54	2870.32	1727.4	1472.77	1611.66	1698.46	1652.17	3851.2	1892.32	1684	1576.94	1712.93	1695.57	1744.76	1715.82	2517.31	1675.32	2080.4	2317.66	1860.5	1724.5	1843.14	1924.15	1684	1938.62	1571.15	2578.08	2138.27	1686.89
1536.59	4079.08	4197.69	2901.64	1837.03	1515.91	1585.34	1695.28	1732.89	3937.33	1868.86	1654.78	1478.31	1669.24	1767.6	1721.31	1640.31	2499.52	1646.1	2091.61	2360.66	1932.5	1750.24	1813.89	1894.89	1683.71	1837.03	1599.81	2670.21	2337.52	1738.67
1535.73	4147.8	4315.56	2953.21	1781.76	1466.48	1657.38	1735.48	1616.89	3922.18	1874.32	1663.17	1559.04	1668.95	1712.34	1822.25	1723.91	2516.45	1683.42	2125.96	2406.53	1880.1	1778.87	1778.87	1952.41	1663.17	1903.24	1602.43	2785.45	2322.65	1619.78
1534.86	4121.05	4196.25	2837.02	1807.48	1466.23	1495.15	1558.77	1645.53	3982.24	1694.69	1787.24	1639.75	1717.83	1790.13	1784.34	1712.05	2576.74	1712.05	2154.52	2342.49	1804.59	1712.05	1781.45	1931.83	1714.94	1894.24	1613.72	2805.21	2328.03	1648.42
1534	4126.13	4256.24	2937.73	1789.82	1437.06	1662.6	1694.4	1685.73	3834.09	1885.24	1731.99	1503.56	1659.7	1743.56	1746.45	1708.86	2480.88	1671.27	2194.63	2318.96	1847.65	1691.51	1772.47	1940.18	1752.23	1934.39	1572.96	2642.8	2255.35	1604.77
1533.13	4151.44	4356.7	2963.25	1818.42	1468.61	1653.64	1711.46	1714.35	3911.49	1876.24	1749.04	1578.47	1740.37	1740.37	1760.6	1725.91	2610.55	1720.13	2159.56	2477.56	1751.93	1766.38	1841.55	2043.92	1691.22	1867.57	1578.47	2703.06	2252.07	1607.38
1532.27	4170.95	4301.03	2997.42	1777.64	1505.94	1705.38	1751.63	1607.1	3954.17	1878.81	1734.28	1520.39	1578.2	1751.63	1803.66	1760.3	2477.14	1702.49	2188.09	2341.28	1797.87	1789.2	1815.22	1910.6	1783.42	1922.17	1586.87	2665.02	2240.12	1690.93
1531.4	4164.46	4465.01	2887.09	1800.46	1557.7	1713.76	1731.1	1632.84	3956.38	1962.29	1806.24	1557.7	1791.79	1771.56	1806.24	1702.2	2401.57	1791.79	2153.03	2381.34	1887.15	1751.33	1849.58	1994.08	1707.98	1936.28	1554.81	2655.89	2300.42	1595.27
1530.54	4129.06	4426.68	2808.57	1843.49	1505.42	1629.67	1727.91	1647	3981.7	1927.28	1831.93	1673.01	1736.58	1768.36	1765.47	1771.25	2586.08	1713.46	2265.35	2383.82	1869.49	1713.46	1745.24	2005.3	1791.48	1956.18	1597.88	2753.67	2334.7	1603.66
1529.67	4255.47	4411.47	2880.31	1814.28	1482.05	1571.61	1765.17	1620.72	4007.02	1912.51	1739.17	1508.05	1701.61	1794.06	1874.95	1744.94	2597.19	1739.17	2221.63	2342.96	1872.06	1704.5	1872.06	2039.62	1707.39	2002.06	1600.5	2753.2	2316.96	1640.94
1528.81	4295.17	4260.51	2885.59	1848.63	1580	1608.88	1663.77	1631.99	3991.88	1889.07	1851.52	1637.77	1811.08	1753.31	1837.07	1709.98	2616.97	1727.31	2227.02	2325.23	1851.52	1709.98	1819.74	1961.28	1744.64	2033.49	1617.55	2709.4	2293.46	1666.65
1527.94	4262.67	4383.96	2960.18	1825.21	1533.52	1703.91	1816.54	1672.14	4043.18	1856.97	1698.14	1553.74	1698.14	1776.11	1781.89	1703.91	2576.08	1689.47	2220.86	2319.05	1877.19	1683.7	1773.22	1998.49	1698.14	2062.02	1576.84	2737.81	2278.62	1677.92
1527.07	4261.93	4423.63	2916.36	1810.45	1524.59	1622.77	1842.22	1663.19	4045.37	1914.4	1781.58	1608.33	1790.24	1778.69	1804.68	1657.42	2627.61	1741.15	2281.11	2442.81	1914.4	1781.58	1856.65	1983.7	1709.39	2047.23	1640.09	2766.21	2258.01	1637.21
1526.21	4284.29	4353.58	2996.7	1795.71	1507.01	1709.1	1795.71	1686	3995.59	1888.09	1668.68	1590.73	1746.63	1787.05	1865	1651.36	2650.26	1865	2194.11	2364.44	1940.06	1758.18	1798.59	2058.42	1697.55	2121.94	1564.75	2823.48	2254.74	1570.52
1525.34	4295.1	4373.04	3004.84	1812.72	1477.88	1622.21	1763.65	1636.64	4061.29	1879.11	1743.44	1625.09	1812.72	1780.97	1850.24	1688.6	2560.32	1705.92	2263.01	2387.13	1925.29	1703.03	1835.81	1971.47	1729.01	2101.37	1616.44	2776.81	2384.24	1619.32
1524.48	4323.22	4409.8	3027.41	1806.63	1538.23	1699.85	1769.11	1699.85	4072.14	2011.54	1797.97	1578.64	1783.54	1873.01	1873.01	1797.97	2562.76	1665.22	2256.85	2453.1	1821.06	1734.48	1789.32	2069.26	1760.46	1999.99	1616.16	2733.04	2340.54	1748.91
1523.61	4276.31	4383.07	2972.06	1918.86	1471.6	1615.88	1777.47	1638.96	4071.44	1907.31	1713.99	1552.4	1742.84	1777.47	1765.92	1664.93	2556.55	1745.73	2224.72	2354.57	1872.69	1783.24	1846.72	2045.82	1832.29	2158.35	1601.45	2764.31	2368.99	1630.31
1522.74	4313.07	4526.56	2991.74	1791.58	1514.62	1667.53	1791.58	1687.72	4036.11	1889.67	1791.58	1606.94	1707.92	1820.43	1855.05	1843.51	2674.39	1731	2316.65	2328.19	1785.81	1762.73	1840.63	2022.38	1774.27	2091.62	1650.22	2734.98	2322.42	1661.76
1521.88	4162.34	4358.48	2985.46	1745.12	1520.13	1733.59	1713.39	1739.35	4124.84	1921.08	1727.82	1675.9	1799.93	1846.08	1857.62	1724.93	2610.47	1802.81	2172.03	2405.67	1805.7	1670.13	1883.58	2088.38	1820.12	2033.57	1566.28	2769.12	2327.79	1589.36
1521.01	4248.14	4377.92	2941.68	1799.62	1444.89	1658.3	1753.47	1629.46	4003	1886.14	1831.34	1632.35	1741.94	1811.15	1851.53	1684.26	2638.86	1747.71	2186.08	2347.58	1926.52	1753.47	1889.02	2076.48	1765.01	2085.14	1615.04	2751.34	2232.22	1649.65
1520.14	4212.8	4282.01	3007.5	1776.24	1545.56	1695.5	1793.54	1669.55	3927.34	1972.32	1816.61	1658.02	1802.19	1813.73	1784.89	1678.2	2609.57	1738.75	2214.53	2410.61	1856.98	1773.36	1833.91	2053.06	1761.82	2064.59	1681.08	2851.79	2367.36	1683.97
1519.27	4333.16	4289.92	2946.44	1819.18	1487.63	1677.91	1738.46	1631.78	3992.97	1946.03	1819.18	1640.43	1712.51	1801.88	1767.29	1738.46	2707.15	1749.99	2217.03	2364.07	1848.01	1819.18	1856.66	2101.71	1799	1940.27	1646.2	2747.51	2378.48	1666.38
1518.41	4479.43	4499.6	2977.64	1790.04	1565.2	1741.04	1671.86	1689.15	4110.46	1899.58	1689.15	1622.85	1686.27	1726.63	1784.28	1784.28	2637.5	1781.39	2251.24	2401.13	1888.05	1761.22	1810.22	2035.05	1709.33	2063.88	1588.26	2755.68	2285.83	1654.56
1517.54	4282.68	4374.9	3017.47	1783.97	1432.36	1700.39	1697.51	1671.57	4040.59	1893.48	1746.5	1711.92	1732.09	1876.19	1844.49	1714.8	2593.81	1769.56	2233.56	2415.13	1861.78	1818.55	1850.25	2028.94	1734.97	2063.52	1625.46	2766.74	2351.72	1587.99
1516.67	4279.06	4426.01	2962.2	1867.22	1452.29	1630.94	1777.9	1665.52	4060.06	1910.45	1777.9	1628.06	1697.21	1829.76	1792.3	1780.78	2538.62	1835.53	2146.73	2359.96	1875.87	1754.84	1832.65	1988.25	1754.84	2002.66	1648.23	2633.71	2331.15	1639.58
1515.8	4304.25	4468.46	2941.52	1815.04	1515.42	1642.18	1740.14	1719.97	4160.2	1938.93	1766.07	1662.35	1696.92	1722.85	1797.76	1702.68	2558.35	1734.38	2238.55	2428.7	1887.07	1737.26	1849.62	2062.81	1699.8	2016.72	1598.97	2734.09	2353.79	1694.04
1514.94	4306.38	4640.53	2949.66	1771.52	1578.53	1595.81	1751.36	1584.29	3943.44	1886.74	1768.64	1618.85	1722.55	1878.1	1869.46	1725.43	2690.41	1636.14	2194.96	2359.15	1788.81	1751.36	1820.49	2059.58	1731.2	1999.08	1610.21	2684.65	2373.55	1647.66
1514.07	4233.64	4426.6	3026.91	1788.5	1474.57	1745.3	1811.54	1707.86	4170.28	1872.02	1765.46	1638.74	1641.62	1779.86	1817.3	1679.06	2592.03	1702.1	2157.14	2404.82	1837.46	1840.34	1828.82	2010.26	1785.62	2050.58	1681.94	2833.95	2335.7	1607.06
1513.2	4215.63	4422.96	3052.3	1747.88	1531.91	1707.56	1624.06	1750.75	4169.56	1935.04	1776.67	1549.19	1719.08	1724.84	1845.78	1770.91	2591.58	1742.12	2240.28	2456.24	1753.63	1724.84	1848.66	1952.32	1793.95	1966.72	1667.25	2689.48	2297.87	1704.68
1512.33	4232.18	4540.24	2971.16	1897.28	1543.16	1704.39	1681.36	1626.65	4033.53	1975.02	1787.88	1502.86	1733.18	1796.52	1779.24	1715.9	2596.89	1810.91	2153.52	2401.11	1845.46	1738.94	1839.7	1920.32	1756.21	1972.14	1583.47	2697.66	2421.27	1733.18
1511.46	4291.9	4430.07	2996.56	1850.9	1479.57	1658.04	1672.43	1686.82	4078.89	1891.2	1732.88	1545.77	1744.39	1672.43	1776.06	1704.09	2697.19	1709.85	2147.39	2348.89	1888.32	1718.49	1842.26	2038	1790.45	1931.5	1681.07	2746.12	2274.04	1660.92
1510.59	4317.06	4363.11	2961.5	1761.36	1582.92	1677.9	1732.58	1597.31	4112.72	1925.41	1784.39	1528.24	1781.51	1755.6	1798.78	1778.63	2584.48	1744.09	2132.63	2394.53	1790.14	1735.46	1841.95	1939.8	1692.29	1954.19	1634.73	2771.55	2316.82	1594.43
1509.73	4345.09	4440.05	3070.34	1853.14	1484.81	1674.73	1723.65	1674.73	4166.68	1870.4	1735.16	1565.38	1743.79	1850.26	1801.34	1634.45	2552.38	1729.4	2184.06	2365.34	1913.57	1786.95	1833	1968.24	1732.28	1876.16	1605.67	2684.75	2388.36	1588.4
1508.86	4375.99	4462.3	2923.08	1786.65	1496.06	1619.78	1760.75	1645.67	4154.46	1924.74	1685.95	1516.2	1749.24	1740.61	1818.29	1677.32	2540.43	1711.84	2146.28	2480.01	1841.31	1783.77	1887.34	2016.81	1755	1970.78	1599.64	2741.83	2255.61	1697.46
1507.99	4214.15	4357.97	2939.84	1866.88	1490.05	1622.37	1708.67	1740.31	4018.54	1921.54	1786.34	1564.84	1714.42	1829.49	1820.86	1789.21	2586.02	1668.4	2117.14	2381.78	1820.86	1766.2	1806.47	2042.35	1780.59	1987.7	1679.91	2703.96	2315.62	1610.87
1507.12	4262.31	4345.72	2965.21	1760.15	1524.31	1659.48	1745.77	1636.47	3894.18	1883.82	1780.28	1515.68	1685.37	1670.99	1734.26	1734.26	2637.34	1719.88	2240.45	2364.12	1866.56	1748.64	1783.15	2033.37	1717	1972.97	1613.47	2657.47	2292.22	1685.37
1506.25	4293.21	4382.35	2976.2	1739.71	1598.81	1593.06	1653.45	1627.57	4163.81	1912.25	1774.22	1587.31	1722.46	1725.33	1791.47	1774.22	2593.75	1670.7	2168.17	2418.34	1831.73	1779.97	1871.99	2050.27	1788.6	1897.87	1693.7	2743.28	2349.33	1618.94
1505.38	4404.59	4416.09	2932.56	1713.54	1546.78	1633.03	1808.41	1621.53	4048.09	1975.17	1722.16	1546.78	1702.04	1779.66	1883.17	1730.79	2527.18	1650.29	2173.55	2406.43	1929.17	1704.91	1819.91	2021.17	1736.54	1865.91	1610.03	2780.18	2251.17	1624.41
1504.51	4248.61	4438.33	2831.45	1716.12	1543.64	1684.5	1716.12	1650	4116.38	1940.33	1690.24	1523.52	1753.48	1644.25	1894.34	1647.13	2641.73	1664.37	2161.67	2446.26	1839.72	1730.49	1836.85	1923.08	1787.98	1963.33	1650	2679.09	2334.15	1650
1503.64	4141.53	4489.3	3014.9	1825.03	1531.88	1672.71	1756.06	1623.85	4049.56	1931.37	1784.8	1511.76	1692.83	1718.69	1758.93	1707.2	2552.17	1744.56	2195.79	2394.1	1879.64	1804.92	1819.29	1991.73	1770.43	1977.36	1523.26	2664.26	2284.88	1638.22
1502.77	4336.22	4563.23	2994.26	1781.62	1525.87	1646.56	1747.13	1727.02	4103.46	1985.64	1767.25	1646.56	1801.73	1747.13	1761.5	1801.73	2597.71	1790.24	2204.03	2350.58	1859.2	1790.24	1818.97	1988.51	1781.62	1954.03	1617.82	2741.39	2327.59	1658.05
1501.9	4358.46	4318.23	2982.25	1675	1528.48	1692.24	1669.26	1629.03	4048.16	1904.85	1752.58	1528.48	1761.2	1749.7	1795.67	1695.12	2617.37	1735.34	2203.65	2373.16	1818.66	1723.85	1993.92	2045.63	1844.52	1856.01	1614.67	2692.07	2263.98	1657.77
1501.03	4257.16	4337.6	2955.89	1835.58	1542.58	1666.1	1700.57	1677.59	4191.09	1930.37	1870.05	1597.15	1803.98	1766.64	1700.57	1803.98	2628.41	1783.87	2183.16	2435.95	1893.03	1749.4	1849.94	2016.55	1686.2	1924.63	1660.35	2691.61	2260.72	1654.61
1500.16	4354.08	4466.09	2923.78	1792.18	1482	1706.02	1734.74	1660.06	4015.17	1861.11	1751.97	1536.57	1786.44	1668.68	1809.41	1763.46	2587.75	1717.51	2168.42	2340.75	1820.9	1780.69	1892.7	2019.08	1743.36	1947.27	1568.16	2783.05	2366.6	1642.83
1499.29	4249.95	4313.13	3055.37	1817.72	1633.93	1639.68	1731.57	1659.78	4083.4	1889.51	1734.44	1461.64	1777.51	1737.31	1852.17	1849.3	2670.58	1780.38	2222.61	2386.29	1900.99	1737.31	1809.1	2076.16	1869.4	2012.98	1605.22	2802.67	2297.27	1685.62
1498.42	4481.78	4521.97	3034.74	1828.89	1622.17	1682.46	1731.27	1739.88	4114.28	1863.34	1823.14	1590.59	1777.21	1791.56	1714.04	1633.65	2615.57	1797.3	2138.96	2423.2	1880.57	1748.5	1780.08	2058.57	1803.05	1946.6	1650.88	2802.19	2296.87	1633.65
1497.55	4331.73	4641.75	2965.33	1828.57	1504.19	1676.43	1822.83	1739.58	4208.29	1911.82	1710.88	1564.48	1664.95	1736.71	1894.59	1799.86	2597.89	1756.81	2267.77	2471.58	1857.28	1690.78	1840.05	2046.74	1788.38	1974.97	1716.62	2652.43	2319.44	1696.52
1496.68	4399.86	4577.81	3068.14	1790.94	1581.43	1641.7	1724.93	1676.14	4193.22	1928.71	1828.25	1532.63	1808.16	1790.94	1782.33	1765.11	2551.52	1836.86	2267.38	2445.33	1922.97	1808.16	1845.47	2023.42	1762.24	1948.8	1653.18	2680.67	2330.52	1670.4
1495.8	4321.62	4614.32	2958.56	1848.03	1463.5	1664.37	1764.81	1738.98	4123.62	1959.94	1790.63	1520.89	1773.42	1744.72	1882.46	1753.33	2619.95	1787.76	2235.42	2393.25	1796.37	1756.2	1744.72	2063.25	1770.55	1951.33	1670.11	2634.3	2344.47	1589.76
1494.93	4559.01	4521.72	2892.06	1819.02	1537.84	1646.87	1744.42	1646.87	4194.64	1907.96	1902.22	1595.22	1755.89	1753.03	1804.67	1709.99	2613.76	1744.42	2171.92	2404.31	1744.42	1816.15	1876.4	1962.47	1732.94	1988.29	1626.78	2711.31	2453.09	1646.87
1494.06	4449.22	4612.73	2900.17	1841.65	1572	1678.14	1692.48	1703.96	4311.53	1947.79	1838.78	1589.21	1718.3	1758.46	1893.28	1764.2	2722.31	1798.62	2260.47	2512.91	1919.1	1878.94	1913.37	1996.55	1795.75	2030.98	1689.61	2765.34	2263.34	1669.53
1493.19	4706.58	4580.38	3023	1852.8	1617.62	1766.76	1798.31	1637.7	4132.96	1924.51	1832.73	1568.86	1763.89	1749.55	1872.88	1761.02	2667.35	1758.16	2311.7	2569.83	1915.9	1864.28	1953.19	2073.65	1775.36	1904.43	1755.29	2750.52	2260.08	1695.06
1492.32	4642.68	4631.21	2976.59	1841.01	1603	1795.13	1743.51	1749.25	4149.45	1924.17	1815.2	1557.12	1884.03	1703.37	1898.37	1806.6	2750.05	1694.76	2274.02	2426.01	1915.57	1829.54	1872.56	2156.45	1829.54	2041.75	1671.82	2761.52	2317.04	1591.53
1491.45	4578.8	4719.29	3145.24	1774.75	1513.84	1723.14	1855.03	1717.41	4085.66	1949.65	1757.55	1605.59	1880.83	1809.16	1929.58	1754.68	2660.69	1809.16	2296.57	2373.98	1860.77	1837.83	1886.57	1995.52	1840.7	2024.19	1605.59	2723.77	2308.04	1708.81
1490.57	4724.21	4752.87	3032.9	1874.78	1611.05	1639.71	1797.38	1668.38	4254.08	1966.51	1837.51	1516.45	1874.78	1940.71	1969.38	1765.84	2671.7	1751.51	2356.37	2511.17	1932.11	1891.98	1934.98	2061.11	1940.71	2009.51	1725.71	2789.23	2373.57	1697.05
1489.7	4780.71	4726.26	3020.91	1854.39	1650.89	1742.61	1828.59	1705.35	4196.02	1908.85	1917.44	1602.17	1860.12	1825.73	1897.38	1874.45	2697.03	1791.33	2333.03	2533.66	1960.44	1768.41	1980.5	2072.22	1820	1994.83	1670.96	2791.62	2444.81	1625.1
1488.83	4782.75	4811.41	3031.85	1868.4	1596.16	1636.28	1702.19	1753.77	4201.03	1954.37	1891.32	1584.7	1822.55	1664.94	1934.31	1722.25	2794	1782.43	2346.96	2470.18	1905.65	1856.93	1942.9	2063.26	1854.07	2014.55	1793.89	2776.81	2315.44	1705.06
1487.96	4847.83	4859.29	3148.79	1911.05	1621.67	1710.49	1822.23	1727.68	4337.83	1994.14	1862.34	1633.13	1873.8	1750.6	1988.41	1819.37	2842.22	1773.52	2415.32	2458.29	1965.49	1850.88	2011.33	2017.06	1836.56	1959.76	1621.67	2879.47	2375.21	1784.99
1487.08	4935.79	4924.33	3033.66	1942.23	1647.17	1592.75	1750.3	1733.11	4288.38	1916.45	1804.73	1569.83	1824.78	1844.83	1893.53	1870.62	2767.25	1902.13	2257.34	2535.21	2068.28	1887.8	1930.77	2108.38	1893.53	2016.71	1750.3	2807.36	2500.84	1784.68
1486.21	4986.49	4854.74	3116.2	1881.75	1560.96	1701.31	1850.24	1815.87	4238.95	1973.4	1881.75	1529.46	1893.21	1764.32	1964.81	1964.81	2783.96	1818.74	2377.25	2460.31	1979.13	1824.47	1936.17	2168.16	1930.44	2030.69	1764.32	2878.48	2394.43	1747.13
1485.34	5062.95	4916.9	3101.34	1838.47	1658.06	1746.83	1901.47	1680.97	4392.85	2021.74	1958.74	1669.51	1953.02	1841.33	1970.2	1829.88	2800.66	1895.74	2299.52	2462.75	1912.92	1829.88	1941.56	2153.47	1987.38	2087.61	1715.33	2918.07	2411.2	1646.6
1484.47	5090.71	5139.38	3077.9	1838.15	1571.88	1715.04	1820.97	1803.79	4360.6	1929.77	2024.26	1646.32	1921.18	1881.1	1987.04	1792.34	2837.4	1783.75	2450.87	2516.72	2064.34	1838.15	1918.32	2181.73	1932.64	2147.37	1778.02	2788.72	2482.36	1769.44
1483.59	5264.45	5101.28	3151.8	1857.87	1734.78	1797.76	1794.89	1771.99	4408.51	2009.59	1995.28	1631.72	1920.85	1840.7	1960.93	1780.58	2894.16	1780.58	2427.54	2499.11	2063.98	1809.21	1995.28	2301.59	1877.91	1955.2	1754.82	2822.59	2424.68	1729.05
1482.72	5140.46	5194.85	3096.87	1854.69	1674.37	1725.89	1920.52	1777.41	4464.99	2043.59	2000.66	1682.96	1940.55	1811.76	2014.97	1923.38	2787.76	1869	2492.95	2595.99	2049.32	1937.69	2006.38	2115.15	1820.34	2023.56	1846.1	2873.62	2421.4	1737.34
1481.84	5299.83	4936.4	3047.69	2008.9	1608.26	1722.73	1845.78	1785.69	4521.45	2089.03	1971.7	1682.67	1934.49	1880.12	1960.25	1865.81	2918.91	1828.61	2461.04	2509.69	1960.25	1925.91	2048.96	2080.44	1991.73	2068.99	1797.13	2878.85	2526.86	1771.38
1480.97	5201.63	5241.69	3213.11	1962.77	1650.9	1639.46	1834.02	1885.52	4266.03	1888.38	2037.16	1590.82	1845.46	1819.71	2034.3	1874.08	2746.74	1905.55	2480.65	2546.45	2011.41	1836.88	2034.3	2160.19	1896.96	2091.53	1773.93	2846.88	2486.37	1748.18
1480.1	5300.86	5260.81	3235.44	1945.27	1627.73	1796.51	1836.56	1736.44	4396.88	2056.84	2008.2	1699.25	1971.01	1782.21	1956.71	1999.62	2832.08	1793.65	2437.31	2623.25	2025.37	1942.41	2114.05	2211.31	1985.32	2065.42	1802.23	2926.48	2497.38	1742.16
1479.22	5371.44	5059.68	3100.45	1959.23	1618.87	1781.9	1907.75	1773.32	4290.29	2067.92	2045.04	1750.44	1982.11	1879.15	2042.18	1827.66	2811.57	1916.33	2476.93	2628.52	2076.5	1927.77	2056.48	2205.21	1933.49	2047.9	1844.83	2903.1	2388.26	1698.96
1478.35	5507.78	5164.62	3122.79	1941.74	1704.38	1735.84	1950.32	1767.29	4555.5	2073.28	2099.02	1661.49	2087.58	1815.91	2087.58	1858.8	2934.05	1835.93	2482.22	2527.97	2110.46	1930.3	2021.81	2273.46	2058.98	2096.16	1744.42	2934.05	2459.34	1690.08
1477.47	5641.21	5346.71	3182.29	1984.29	1635.47	1738.4	1875.64	1709.8	4569.01	1978.57	2178.71	1741.26	2041.47	1895.65	2067.21	1892.79	2899.23	1855.62	2553.27	2544.69	2078.64	1918.53	2041.47	2213.02	2067.21	2141.54	1778.43	2950.7	2530.4	1701.23
1476.6	5577.34	5280.04	3287.52	1886.75	1663.77	1663.77	1941.06	1826.72	4350.96	2124.02	2018.25	1652.33	2043.98	1898.18	2038.26	1898.18	2933.04	1792.41	2475.64	2567.12	2092.58	1929.63	1969.65	2201.21	1958.22	2201.21	1823.86	2893.01	2449.91	1763.82
1475.72	5404.89	5299.13	3266.94	2012.18	1692.06	1792.1	1992.18	1895	4461.67	2112.22	2106.5	1777.81	2049.34	1863.56	2100.79	1920.72	2941.1	1834.97	2512.37	2692.44	2097.93	1969.31	1969.31	2295.15	1980.74	1983.6	1817.83	2975.4	2509.51	1709.21
1474.85	5669.72	5338.22	3240.66	1948.97	1708.92	1860.38	1991.83	1857.52	4569.5	2126.14	2166.15	1691.77	2051.84	1900.38	2026.12	1871.81	2923.45	1774.64	2623.39	2680.54	2174.73	1968.97	2074.71	2243.31	1963.25	1997.55	1871.81	3097.77	2480.5	1703.2
1473.98	5708.74	5591.59	3254.38	2000.06	1760.05	1762.91	1965.77	1851.48	4680.14	2020.06	2162.92	1725.76	2057.2	1937.2	2182.92	1922.91	3057.23	1840.05	2722.94	2520.07	2077.2	1965.77	1994.34	2297.21	2028.63	2105.78	1854.34	2920.09	2482.93	1780.05
1473.1	5867.73	5499.21	3222.39	2019.71	1794.03	1774.03	2033.99	1808.31	4647.9	2125.41	2091.13	1722.61	2133.98	1939.72	2016.85	1916.87	3125.26	1856.88	2568.2	2522.49	2245.39	1971.15	2016.85	2308.24	2042.56	2002.57	1902.58	2948.15	2545.35	1804.01
1472.22	5955.26	5669.63	3173.28	1973.66	1805.14	1799.43	1930.82	1910.82	4749.92	2047.92	2282.13	1770.87	2122.18	1890.83	2162.17	1959.38	3093.31	1839.42	2593.46	2579.18	2162.17	1945.1	2067.92	2284.99	2010.79	2105.05	1987.94	2987.62	2630.59	1827.97
1471.35	5908.53	5685.78	3306.95	1921.92	1761.99	1861.94	2016.15	1936.19	4586.32	2153.23	2153.23	1756.28	2064.7	1927.63	2104.68	1876.22	2932.85	1933.34	2601.58	2664.41	2330.29	1993.31	2098.97	2387.4	2036.15	2118.96	1856.23	3047.08	2421.67	1851.93
1470.47	6075.97	5824.71	3237.85	2044.36	1773.11	1753.12	2032.94	1867.33	4716.87	2172.84	2224.24	1804.52	2158.57	1930.15	2258.5	2021.52	3135.06	1893.03	2592.57	2726.76	2287.05	1987.25	2221.38	2341.3	2110.03	2095.75	1844.49	3063.68	2678.22	1875.9
1469.6	6269.04	6006.4	3314.37	2021.17	1809.91	1838.46	2024.02	1884.14	4630.41	2203.87	2178.18	1715.71	2166.76	1869.86	2024.02	1915.54	3280.11	1909.83	2683.47	2657.78	2258.11	2055.42	2066.84	2318.06	2201.02	2215.29	1958.36	3171.63	2577.84	1795.64
1468.72	6259.39	5899.76	3353.76	1989.42	1806.75	1855.27	2123.57	1878.1	4703.82	2180.66	2180.66	1752.52	2303.39	2003.69	2134.99	1889.52	3316.65	1989.42	2671.59	2705.84	2303.39	1995.13	2154.97	2306.24	2183.51	2180.66	2000.84	3045.5	2585.96	1821.02
1467.85	6466.63	6184.11	3404.54	2049	1852.09	1923.44	2160.3	1980.51	4791.47	2240.21	2357.21	1749.36	2220.23	2003.34	2254.48	1863.51	3164.83	1943.41	2731.05	2808.11	2257.33	1949.12	2203.11	2345.8	2177.42	2263.04	1937.71	3030.7	2622.61	1872.07
1466.97	6496.9	6074.62	3361.15	2040.09	1720.52	1820.39	2117.13	1997.29	4970.4	2194.17	2285.47	1920.25	2268.35	2011.56	2256.94	2011.56	3181.4	1940.23	2713.46	2716.32	2342.54	2128.54	2179.9	2419.58	2094.3	2214.14	2020.12	3187.11	2670.66	1771.88
1466.09	6584.21	6216.2	3357.72	1988.39	1911.36	1805.81	2122.47	1954.15	4926.75	2210.9	2362.1	1837.19	2305.04	2039.74	2279.37	2031.18	3340.6	1991.24	2755.78	2861.34	2407.74	2096.79	2265.11	2496.18	2190.93	2116.76	2079.68	3098.12	2653.08	1825.78
1465.22	6856.89	6283.58	3402.78	2093.58	1939.55	1888.21	2113.54	1853.98	4945.86	2221.93	2490.04	1885.36	2250.45	1931	2293.24	2042.24	3325.76	2067.91	2786.68	2721.08	2407.33	2124.95	2284.68	2407.33	2184.85	2321.76	2053.64	3108.99	2766.72	1896.77
1464.34	6969.78	6388.01	3559.03	2178.77	1836.55	1893.59	2244.36	1981.99	4984.93	2167.36	2429.73	1870.77	2324.21	2127.44	2344.17	2013.36	3296.67	2021.92	2783.35	2723.46	2372.69	2127.44	2315.65	2515.28	2232.95	2347.02	2173.06	3151.23	2680.68	1805.18
1463.46	7119.69	6629.26	3404.45	2178.39	1879	1864.75	2229.71	1887.56	5195.06	2278.19	2466.37	1944.58	2289.59	2101.41	2335.21	1993.06	3333.17	2090	2902.62	2765.76	2457.82	2109.96	2269.63	2477.78	2238.27	2281.04	2178.39	3139.28	2720.14	1898.96
1462.59	6944.56	6482.73	3452.32	2135.25	1941.4	1867.28	2155.21	2029.77	5122.89	2317.7	2503	1907.19	2579.98	2081.09	2292.05	2029.77	3278.42	1969.9	2890.71	2856.5	2485.9	2138.1	2223.63	2505.86	2257.84	2226.48	2001.26	3190.05	2676.9	1867.28
1461.71	7157.13	6683.97	3460.28	2166.23	1918.26	1938.21	2217.54	1975.26	5116.3	2248.89	2590.93	2040.82	2494.02	2043.67	2348.65	2040.82	3391.87	2092.13	2932.97	2781.9	2445.57	2035.12	2288.8	2533.92	2271.7	2226.09	2089.28	3218	2699.24	1818.5
1460.83	7272.73	6574.52	3636.36	2111.71	2003.42	1883.73	2168.71	1994.87	5340.55	2288.4	2576.23	2006.27	2470.79	2034.77	2385.3	2037.62	3462.53	2086.06	2915.36	2869.76	2467.94	2051.87	2316.9	2687.38	2314.05	2379.6	2074.67	3188.94	2673.13	1803.93
1459.95	7223.03	6559.14	3479.02	2114.2	1937.54	2031.57	2188.28	1980.28	5100.29	2350.69	2473.21	1943.24	2496.01	2148.39	2302.25	2062.91	3365.05	2080	3008.88	2883.51	2419.07	2191.13	2370.64	2444.72	2367.79	2296.55	2250.96	3248.23	2869.27	1937.54
1459.08	7378.46	6708.99	3635.1	2142.32	1951.45	1965.69	2418.66	2034.06	5167.77	2367.38	2458.54	1988.48	2375.92	2062.55	2316.1	2213.54	3421.44	2125.23	2971.33	2868.77	2512.67	2196.45	2355.98	2643.71	2296.16	2318.95	2179.35	3216.33	2709.24	1891.62
1458.2	7417.06	6952.78	3600.29	2156.19	1968.2	1851.42	2295.76	1979.59	5218.15	2318.54	2472.35	2073.59	2466.66	2119.16	2443.87	2119.16	3512	2025.17	2976.51	2779.97	2483.75	2167.58	2364.12	2640.41	2318.54	2446.72	2047.95	3304.07	2859.73	1925.47
1457.32	7484.13	6837.67	3599.67	2152.97	1979.25	1979.25	2349.47	1982.1	5393.81	2369.4	2571.6	1959.31	2506.1	2093.16	2343.77	2135.88	3511.39	2178.6	2958.91	2751.01	2568.75	2266.88	2360.86	2682.67	2360.86	2135.88	2192.84	3331.97	2748.17	1976.4
1456.44	7824.51	6913.36	3655.99	2255.1	2092.8	1953.28	2400.31	2115.58	5167.94	2317.74	2696.44	1967.52	2571.15	2138.36	2300.66	2001.69	3479.46	2212.39	3026.73	2878.67	2534.14	2229.47	2388.92	2613.87	2417.4	2349.06	2175.37	3268.75	2779.01	1927.65
1455.57	7504.31	6994.72	3495.94	2157.92	1955.79	1995.64	2288.87	2072.51	5406.18	2325.88	2684.58	2032.65	2584.94	2200.62	2394.2	2089.59	3578.5	2126.6	3011.97	2844.01	2536.55	2160.76	2425.52	2647.57	2365.74	2360.04	2155.07	3345.05	2787.07	1998.49
1454.69	7616.86	7041.9	3614.88	2114.85	2103.46	1881.44	2353.94	1992.45	5265.77	2422.25	2581.65	1929.83	2553.19	2174.62	2487.72	2103.46	3421.33	2072.15	2863.44	2874.82	2587.34	2311.24	2345.4	2598.73	2279.93	2356.79	2214.47	3185.08	2695.5	1918.45
1453.81	7635.46	7052.06	3608.56	2182.78	2114.48	1989.26	2231.16	2040.49	5299.01	2325.07	2584.05	1923.81	2555.59	2174.24	2330.77	2128.71	3605.71	2123.02	3033.69	2968.24	2646.66	2248.24	2285.23	2646.66	2342.15	2396.22	2327.92	3366.66	2834.48	1866.89
1452.93	7858.92	6993.93	3667.69	2171.02	2088.5	1934.85	2347.43	2085.66	5454.58	2387.27	2651.89	2071.43	2532.38	2148.26	2404.34	2227.93	3508.35	2088.5	2913.66	2811.23	2606.36	2264.92	2489.7	2711.64	2438.49	2387.27	2270.61	3351.85	2885.21	1909.25
1452.05	7755.15	7251.6	3669.9	2290.13	2045.47	2113.75	2375.48	2133.66	5439.41	2384.01	2699.79	1971.5	2637.2	2133.66	2492.12	2113.75	3567.48	2102.37	3029.8	2964.37	2622.98	2284.44	2378.32	2580.31	2364.1	2349.87	2213.32	3365.49	2881.86	1923.14
1451.17	7876.11	7173.55	3797.26	2244.22	2136.14	1951.25	2335.24	2087.78	5404.34	2343.78	2784.66	2090.63	2631.06	2235.69	2645.28	2255.6	3697.7	2153.2	2943.94	2818.79	2628.21	2247.07	2352.31	2639.59	2360.84	2371.06	2190.18	3327.93	2855.77	2036.58
1450.29	8016.94	7260.46	3688.53	2280.8	2124.39	2115.86	2337.68	2167.05	5539.91	2457.13	2815.46	1982.19	2650.51	2235.3	2519.69	2081.73	3697.06	2246.68	3077.09	2980.4	2482.72	2243.83	2425.84	2806.92	2397.4	2392.25	2167.05	3315.98	2829.68	1976.51
1449.41	8009.86	7367.25	3659.46	2414.05	2106.96	2067.15	2539.16	2143.92	5544.63	2317.37	2792.22	2050.09	2613.09	2175.2	2533.47	2141.08	3511.6	2166.67	3045.28	2988.42	2655.74	2334.43	2513.57	2797.91	2360.02	2413.45	2215.01	3304.03	2979.89	1993.22
1448.53	8176.21	7329.02	3650.29	2280.01	2143.55	1992.88	2444.9	2126.5	5424.27	2427.84	2717.82	2004.25	2734.88	2174.83	2598.42	2152.08	3664.51	2152.08	3226.7	2965.15	2695.08	2388.04	2370.99	2763.31	2362.46	2434.64	2234.53	3348.95	2896.92	1933.18
1447.65	8140.68	7384.6	3746.3	2205.71	2111.91	1947.05	2424.58	2151.71	5639.35	2379.1	2754.3	2012.43	2597.97	2128.97	2543.96	2120.44	3643.98	2163.08	3084.02	2907.79	2671.87	2205.71	2441.64	2720.19	2418.9	2455.85	2279.62	3473.43	2998.75	1969.79
1446.77	8059.69	7502.68	3799.65	2236.59	2020.61	1992.19	2461.11	2091.66	5544.59	2424.16	2787.93	2097.34	2810.66	2029.13	2574.78	2088.81	3668.92	2179.75	3086.33	3046.54	2668.57	2284.91	2546.36	2728.25	2353.11	2427	2370.16	3535.35	2867.5	1986.5
1445.9	8296.98	7418.97	3676.81	2281.67	2071.4	1903.76	2449.31	2176.54	5398.72	2398.17	2679.47	2040.15	2580.02	2366.91	2489.09	2185.06	3716.59	2224.84	2963.61	3031.81	2577.18	2187.9	2437.95	2727.77	2327.13	2432.26	2315.77	3529.06	2821.54	1963.43
1445.02	8099.51	7323.94	3889.24	2235.82	2073.88	1948.88	2409.11	2133.54	5502.9	2477.3	2786.96	2150.59	2673.32	2173.32	2562.53	2198.89	3639.24	2221.61	3096.62	2957.42	2724.46	2235.82	2454.57	2744.35	2451.73	2434.68	2215.93	3477.31	2985.83	1943.2
1444.13	8058.34	7263.02	3743.71	2329.16	2019.56	2079.21	2346.21	2016.72	5433.77	2397.34	2670.02	2059.32	2635.93	2195.66	2587.65	2141.7	3559.08	2158.74	3141.53	2922.82	2692.74	2309.28	2420.06	2741.03	2391.65	2408.7	2260.99	3439.78	2942.7	1871.85
1443.25	8039.9	7412.27	3728.86	2229.36	2078.84	2027.73	2436.68	2024.89	5412.95	2360	2706.47	2010.69	2720.67	2212.32	2524.72	2141.32	3652.18	2223.68	3112.59	2998.99	2641.16	2246.4	2439.52	2777.47	2379.88	2538.92	2274.8	3416.46	2893.91	1970.93
1442.37	8052.71	7175.31	3779.32	2237.49	2101.2	1891.08	2390.82	2126.76	5434.73	2390.82	2620.82	2146.63	2674.77	2211.94	2490.21	2126.76	3572.04	2123.92	3004.15	2984.27	2771.31	2385.15	2558.35	2759.95	2416.38	2419.22	2393.66	3435.75	2865.01	1950.71
1441.49	7892.33	7060.51	3821.25	2174.65	2126.39	1987.28	2444.35	2134.9	5325.9	2316.6	2705.54	2123.55	2600.49	2211.56	2330.79	2143.42	3659.43	2132.06	3085.96	2915.62	2478.42	2285.37	2441.51	2767.99	2387.57	2413.12	2254.14	3557.23	2858.84	2012.83
1440.61	7749.03	7266.49	3829.1	2262.26	2018.16	1986.93	2347.42	2091.96	5526.51	2409.86	2756.16	2063.57	2625.59	2262.26	2355.93	2137.37	3579.32	2137.37	3088.26	2872.54	2583.01	2310.52	2384.32	2722.1	2367.29	2441.09	2248.07	3502.68	2954.85	1964.22
1439.73	7883.91	7279.42	3649.64	2213.63	1980.91	2060.37	2349.85	2114.3	5559.61	2361.2	2593.92	2077.4	2605.27	2190.92	2494.59	2102.94	3700.73	2173.89	3130.29	3005.42	2645	2261.87	2457.69	2693.24	2298.77	2403.77	2224.98	3351.66	2928.8	1949.69
1438.85	7726.48	7139.12	3714.27	2255.8	2057.18	1991.92	2315.39	2023.13	5297.59	2423.22	2593.47	2025.97	2587.79	2190.54	2499.83	2167.84	3563.89	2159.33	2942.48	2973.69	2565.09	2233.1	2431.73	2814.79	2287.02	2443.08	2389.17	3365.26	2914.1	1946.52
1437.97	7858.48	6964.83	3801.58	2261.08	2034.13	1991.57	2349.03	2011.43	5231.42	2459.68	2644.08	2093.7	2502.23	2312.15	2471.02	2124.91	3537.74	2096.54	2842.67	3024.24	2465.35	2300.8	2349.03	2678.13	2357.54	2485.21	2181.65	3427.09	2924.94	2017.1
1437.09	7437.32	6969.29	3647.75	2266.36	2011.08	2028.1	2337.28	2110.36	5267.39	2413.87	2601.07	1996.9	2541.51	2203.96	2368.48	2076.32	3477.55	2118.87	3037.9	2879.05	2581.22	2161.42	2323.1	2759.92	2300.41	2436.56	2238	3400.97	2952.8	1994.06
1436.21	7481.4	7027.64	3621.59	2271.65	1951.18	1934.16	2277.32	2058.95	5189.9	2382.25	2558.08	2022.08	2572.26	2169.55	2444.64	2070.29	3476.95	2090.14	3057.22	2887.06	2606.3	2183.73	2322.69	2637.49	2334.04	2453.15	2214.93	3340.82	2889.9	1868.93
1435.32	7366.68	6850.62	3635.14	2183.35	1976.36	2021.73	2279.76	2007.55	5183.33	2350.65	2557.64	1982.03	2438.55	2163.5	2464.07	2035.9	3459.33	2103.96	2878.05	2812.84	2506.6	2262.75	2302.44	2662.55	2370.5	2333.63	2152.16	3354.42	2866.71	2004.71
1434.44	7138.6	6770.05	3472.91	2080.91	1910.81	1851.27	2211.32	1947.66	5137.07	2418.28	2503.33	1933.49	2395.6	2089.42	2290.7	1941.99	3333.99	2080.91	2900.23	2888.89	2511.83	2148.95	2440.96	2642.25	2361.58	2333.23	2134.78	3268.79	2832.19	1913.64
1433.56	7001.3	6794.38	3684.9	2117.4	1853.79	1981.34	2159.92	2066.38	5079.49	2372.51	2434.87	1907.64	2457.54	2040.87	2349.83	2049.37	3418.45	2106.06	2953.59	2857.21	2347	2205.27	2338.49	2491.56	2193.93	2378.18	2157.08	3285.23	2741	1950.16
1432.68	6813.04	6504.13	3562.39	2134.04	1915.81	1907.31	2136.87	1921.48	5007.76	2289.91	2301.24	1972.49	2386.27	2122.7	2335.25	2012.17	3366.84	2063.18	2904.9	2757.52	2448.61	2094.36	2193.55	2513.8	2255.9	2287.07	2100.03	3250.65	2746.19	1881.81
1431.8	6908.2	6469	3539.11	2184.67	1881.48	1915.48	2204.5	1921.15	4947.38	2394.35	2417.02	1915.48	2419.85	2017.49	2283.84	1957.98	3272.75	1966.49	2740.04	2847.72	2394.35	2145	2255.51	2519.03	2249.84	2230.01	2102.5	3247.25	2762.71	1906.98
1430.91	6487.71	6227.07	3476.16	2059.63	1866.99	1934.98	2206.95	1912.32	5099.51	2246.62	2368.44	1864.15	2240.95	1997.31	2235.28	1988.81	3280.68	1951.98	2835.89	2731.07	2402.43	2085.13	2249.45	2391.1	2221.12	2155.96	1943.48	3102.2	2779.23	1915.15
1430.03	6557.4	6180.66	3455.73	2124.43	1824.17	1943.14	2121.59	1900.65	4982.49	2195.24	2387.86	1807.18	2274.55	1979.97	2166.91	1937.48	3220.63	1923.31	2804.24	2798.58	2260.39	2113.1	2280.22	2450.17	2200.91	2297.21	2039.45	3212.13	2668.28	1838.34
1429.15	6400.49	5907.71	3517.44	2152.38	1823.86	1829.52	2152.38	1908.82	4947.64	2158.04	2296.81	1702.08	2163.71	2013.61	2197.69	1993.78	3265.38	1979.62	2744.28	2679.14	2223.18	2056.09	2245.84	2424.26	2087.24	2359.12	2024.93	3163.43	2656.49	1778.54
1428.27	6141.71	5895.36	3358.26	2103.87	1761.25	1911.32	2095.37	1860.35	4847.67	2177.49	2168.99	1874.51	2205.8	2095.37	2234.12	1931.14	3250.66	2064.23	2729.65	2772.12	2285.09	2072.72	2208.64	2392.69	2188.81	2307.74	1925.48	3185.53	2755.13	1857.52
1427.38	6338.82	5984.93	3459.6	2038.39	1786.42	1885.51	2066.7	2010.08	4994.05	2154.46	2267.71	1800.58	2143.14	2052.54	2154.46	1939.3	3032.1	2007.24	2632.92	2666.89	2335.65	1970.44	2202.59	2477.21	2174.28	2233.73	1944.96	3071.74	2641.41	1831.72
1426.5	6119.76	5915.96	3524.1	1998.4	1876.69	1873.86	2117.29	1958.78	4854.48	2182.39	2289.96	1871.03	2233.34	1978.59	2207.87	2004.07	3229.72	1780.45	2697.56	2748.51	2301.28	2122.95	2077.66	2374.87	2128.61	2227.68	1961.61	3116.49	2700.39	1822.91
1425.62	6081.91	5838.52	3495.19	2139.56	1782.97	1867.87	2051.83	1930.13	4975.33	2176.35	2264.09	1746.18	2218.81	1998.06	2252.77	2006.55	3198.02	1949.95	2648.98	2722.57	2354.65	2017.87	2156.54	2292.39	2111.26	2136.73	1918.81	3158.4	2680.11	1825.42
1424.73	6137.44	5812.04	3443.65	2037.32	1805.3	1887.36	2009.03	2034.5	4852.79	2192.95	2221.25	1842.08	2187.29	2037.32	2108.07	2028.84	3163.51	1938.29	2563.63	2705.11	2348.58	2108.07	2286.33	2427.81	2051.47	2127.87	1890.18	3039.01	2645.69	1810.96
1423.85	6048.67	5898.73	3321.39	2062.43	1768.2	1875.71	2150.14	1895.51	4820.83	2249.16	2209.55	1799.32	2223.69	1952.1	2189.74	2000.19	3194.08	1940.78	2645.23	2732.94	2220.86	2053.95	2201.06	2348.18	2073.75	2249.16	1946.44	3010.19	2526.41	1722.94
1422.97	6197.54	5824.16	3436.79	2132.79	1700.01	1889.53	2098.85	1875.39	4876.57	2237.45	2333.62	1759.41	2211.99	1957.42	2220.48	1960.24	3247.27	1957.42	2579.72	2726.8	2313.82	2067.73	2115.82	2305.34	2101.68	2098.85	2016.82	2984.21	2622.14	1900.84
1422.08	6080.51	5743.96	3331.55	2090	1843.95	1900.51	2073.03	1849.61	4881.38	2090	2149.39	1801.53	2157.87	2002.33	2163.53	1957.08	3215.6	2019.29	2638.66	2675.42	2234.23	2010.81	2163.53	2384.13	2188.98	2211.61	2067.37	3034.6	2593.41	1858.09
1421.2	5977.66	5748.62	3291.39	2086.81	1809.7	1903.01	2001.98	1917.15	5067.15	2157.5	2262.12	1744.66	2197.09	1951.08	2194.26	2001.98	3118.9	1959.56	2759.79	2731.51	2281.92	2024.6	2112.26	2403.5	2106.6	2253.64	1973.7	3056.69	2635.37	1832.32
1420.31	6084.05	5968.14	3468.93	2058.17	1840.48	1880.06	2103.41	1905.51	4924.91	2148.64	2391.78	1744.36	2202.36	1998.8	2123.2	1993.15	3109.88	1913.99	2609.47	2691.46	2290	2083.62	2182.57	2428.53	2049.69	2174.09	1956.4	3177.73	2671.67	1795.25
1419.43	6102.78	5661.82	3335.47	2080.43	1783.63	1919.31	1989.98	1953.23	4943.85	2247.2	2264.16	1772.32	2170.88	1956.06	2165.23	2066.3	3267.63	1958.88	2518.56	2594.88	2218.94	1998.46	2136.96	2425.28	2173.71	2153.92	1967.36	2942.56	2563.79	1857.12
1418.54	6042.37	5646.7	3467.72	2017.89	1876.58	1845.49	2012.24	1853.97	4801.68	2173.33	2229.85	1853.97	2252.46	1983.98	2181.81	1998.11	3233.15	2012.24	2724.44	2679.22	2292.03	2000.93	2184.64	2238.33	2133.76	2229.85	1961.37	3100.32	2628.35	1811.58
1417.66	6035.67	5713.54	3303.23	2079.71	1828.22	1825.39	1986.46	1898.86	4882.79	2187.08	2189.91	1819.74	2192.73	2011.89	2201.21	1912.99	3215.63	1876.26	2681.58	2715.49	2232.29	2156	2271.85	2302.94	2133.39	2110.79	1946.9	3125.21	2763.52	1783.01
1416.77	5884.88	5859.46	3333.73	2116.07	1720.54	1918.31	1988.94	2003.06	4907.37	2152.8	2223.43	1842.03	2172.58	1974.81	2133.02	1963.51	3104.89	1994.59	2709.36	2731.96	2214.95	2014.36	2087.82	2356.21	2116.07	2217.78	2017.19	3116.19	2613.31	1836.38
1415.89	6101.36	5722.85	3384	2056.39	1898.2	1844.53	1991.42	1884.08	4818.95	2177.85	2206.09	1785.21	2203.27	1982.94	2158.07	2053.56	3194.74	2005.54	2612.85	2813.41	2273.89	1999.89	2121.35	2302.13	2146.78	2208.92	2090.28	3045.03	2635.45	1853.01
1415	5950.62	5724.68	3360.81	2047.56	1861.16	1968.48	2047.56	1835.74	4843.53	2146.4	2177.47	1793.38	2058.85	1993.9	2265.02	1976.95	3112.28	1957.18	2685.83	2595.45	2248.07	2022.14	2118.16	2327.15	2061.68	2200.06	1937.41	2962.6	2733.84	1889.4
1414.12	5862.05	5613.56	3402.59	2089.56	1804.36	1917.31	2066.97	1874.95	4831.39	2191.21	2332.4	1759.18	2185.56	1956.84	2182.74	2050.02	3066.56	1945.55	2733.36	2682.54	2261.8	2075.44	2114.97	2397.34	2075.44	2219.45	2035.9	3159.75	2637.36	1897.54
1413.23	5714.22	5601.29	3424.58	2089.19	1705.23	1922.62	2004.49	1880.27	4830.55	2176.71	2131.54	1772.99	2114.6	1888.74	2145.66	2001.67	3136.61	2018.61	2761.12	2786.53	2219.06	2038.37	2111.78	2371.52	2123.07	2190.83	1914.15	3105.56	2670.78	1787.11
1412.35	5905.18	5699.12	3407.05	2086.01	1761.39	1925.11	2038.02	1896.88	4877.7	2252.55	2187.62	1783.97	2277.95	1964.63	2105.77	2035.2	3158.65	1936.4	2627.97	2611.04	2207.38	2049.31	2108.59	2355.13	2049.31	2105.77	1947.69	3059.85	2738.06	1846.07
1411.46	5805.37	5698.12	3381.06	2015.09	1834.46	1913.49	1969.93	1845.75	4910.72	2190.07	2170.31	1811.88	2113.87	1964.29	2173.13	1944.53	3177.85	2012.26	2540.03	2706.54	2249.33	2113.87	2178.78	2338.74	2111.04	2164.67	1938.89	3143.99	2568.25	1848.57
1410.58	5897.48	5666.09	3366.36	2065.53	1870.83	1862.36	2017.56	1932.91	4799.81	2209.44	2167.11	1817.21	2184.04	2009.09	2198.15	1983.7	3199.88	2045.78	2683.49	2734.29	2223.55	2054.24	2167.11	2322.35	2079.64	2274.34	1893.4	3087.01	2723	1865.18
1409.69	5983.91	5566.36	3396.81	2113.13	1752.01	1986.17	1980.53	2031.31	4767.95	2214.7	2262.66	1856.4	2211.88	1966.42	2200.59	1994.64	3173.93	1952.32	2595.57	2747.92	2214.7	1904.36	2127.24	2305.95	2118.77	2183.66	1960.78	2999.01	2685.85	1831
1408.8	5633.09	5511.8	3472.38	2121.23	1827.86	1827.86	2059.17	1994.29	4834.81	2146.61	2138.15	1799.66	2188.92	1991.47	2166.36	2005.57	3116.96	1988.65	2640.25	2713.59	2310.22	1966.08	2152.25	2289.55	2053.53	2183.28	1915.31	3001.31	2631.79	1867.36
1407.92	5888.76	5561.61	3367.42	2078.55	1889.59	1872.67	2089.83	1985.48	4946.79	2118.04	2213.93	1731.66	2168.8	1872.67	2219.57	1946	3093.86	1951.64	2656.71	2713.12	2259.05	1982.66	2154.7	2273.15	2129.32	2177.26	2008.05	3043.09	2653.89	1920.62
1407.03	5915.94	5363.25	3490.91	2114.85	1703.16	1911.82	2106.39	1959.76	4960.02	2205.08	2244.56	1739.82	2224.82	1914.64	2210.72	1993.6	3022.82	1863.89	2608.31	2701.37	2261.48	2064.09	2140.23	2351.71	2055.63	2131.77	1841.33	2986.17	2630.87	1818.77
1406.14	5872.62	5649.89	3464.93	2012.99	1770.52	1883.3	1976.33	1965.06	4967.62	2142.67	2297.74	1793.08	2120.12	1973.51	2278	2041.18	3222.47	1942.5	2650.15	2734.73	2173.69	2024.26	2199.06	2303.37	2117.3	2210.34	1903.03	3216.83	2731.91	1945.32
1405.26	5837.77	5691.19	3492.51	2094.38	1742.03	1908.34	2001.36	1995.72	5031.59	2060.55	2164.85	1705.38	2173.31	1973.17	2238.14	2021.09	3182.44	1902.7	2593.31	2680.69	2300.15	2015.45	2215.59	2300.15	2071.83	2167.67	1992.9	2996.4	2782.17	1826.59
1404.37	5707.11	5709.93	3455.27	2172.93	1789.64	1944.65	1972.83	2096.83	5033.53	2249.02	2234.93	1798.09	2125.02	1978.47	2144.75	1992.56	3128.34	2065.83	2590.04	2733.78	2271.57	2077.11	2156.02	2268.75	2043.29	2181.38	2037.65	3193.16	2578.77	1933.37
1403.48	5770.93	5632.85	3372.95	2113.38	1809.05	1848.5	1975.3	1938.67	5074.92	2116.19	2240.18	1775.24	2175.37	2006.3	2288.08	2073.93	3110.89	1947.12	2744.57	2702.3	2279.63	2164.1	2240.18	2245.82	2119.01	2141.56	2006.3	3009.45	2660.04	1749.88
1402.59	5907.97	5662.86	3518.86	2096.11	1831.27	1865.08	2036.94	1955.24	4947.26	2267.96	2284.87	1780.56	2180.63	2082.02	2279.23	2028.49	3113.17	1974.96	2659.57	2715.92	2290.5	2039.76	2160.9	2290.5	2028.49	2144	1972.14	3099.08	2696.2	1876.35
1401.71	5968.92	5653.43	3394.31	2070.39	1783.07	1923.91	2059.12	1983.07	4952.03	2197.15	2273.2	1738	2149.26	2008.42	2183.06	1926.73	3174.6	2016.87	2630.94	2743.62	2216.87	2011.23	2214.05	2281.65	2152.08	2149.26	2016.87	3106.99	2546.44	1828.14
1400.82	5835.51	5669.34	3450.05	2095.38	1827.82	1858.8	2086.93	1929.21	4951.17	2109.46	2115.09	1833.45	2146.07	1909.5	2219.3	2075.66	3134.61	1906.68	2613.59	2816.37	2317.87	2151.7	2157.34	2391.09	2148.89	2244.64	2030.6	3092.37	2644.57	1782.76
1399.93	5800.7	5541.64	3367.79	2162.59	1728.95	1861.29	2069.67	1883.82	4832.04	2137.25	2185.12	1872.56	2294.94	2033.06	2213.28	2030.25	3255.15	1923.24	2618.76	2742.66	2275.23	2066.85	2258.33	2334.36	2049.96	2128.8	2021.8	3100.28	2731.4	1900.72
1399.04	5740.57	5566.02	3361.57	2198.82	1776.51	1897.57	2049.6	1911.65	4915.66	2246.68	2190.37	1742.72	2212.89	2077.75	2201.63	2038.34	3023.72	2032.71	2590.15	2711.22	2243.86	2049.6	2263.57	2328.32	2010.18	2221.34	1953.88	3102.55	2722.48	1911.65
1398.16	5669.2	5694.53	3375.06	2046.43	1818.42	1857.83	2043.61	2004.21	4982.36	2204.06	2265.99	1767.75	2136.51	2046.43	2147.76	2040.8	3124.53	2035.17	2575.63	2792.38	2209.69	2088.65	2147.76	2319.47	2175.91	2206.88	2007.02	3102.01	2620.67	1857.83
1397.27	5862.41	5530.31	3337.88	2150.21	1806.85	1888.47	2057.33	1913.8	4958.98	2186.79	2175.54	1736.49	2141.76	2037.63	2169.91	2015.11	3171.83	2060.14	2670.87	2648.36	2240.27	2074.22	2169.91	2333.14	2127.69	2259.97	1967.27	3093.03	2659.61	1880.02
1396.38	5754.46	5658.78	3371.07	2082.3	1758.7	1913.46	2031.65	1935.97	4884.96	2135.76	2192.04	1879.7	2099.18	1955.67	2208.92	1966.93	3086.87	1978.18	2631.01	2743.57	2287.71	2023.21	2172.34	2428.41	2116.06	2172.34	1972.55	3106.56	2614.13	1862.81
1395.49	5671.87	5587.46	3446.45	2081.93	1845.61	1960.96	2205.73	1960.96	5069.79	2256.37	2256.37	1856.86	2233.86	1932.82	2197.29	2093.19	3173.54	1966.58	2661.5	2681.19	2323.89	2180.4	2205.73	2340.77	2225.42	2205.73	2003.16	3145.41	2751.53	1839.98
1394.6	5724.32	5625.87	3541.49	2194.09	1676.51	1921.24	2098.45	1938.11	5023.9	2210.97	2233.47	1828.41	2194.09	2028.13	2255.97	2036.57	3234.88	2092.82	2736.99	2708.86	2281.29	2073.13	2213.78	2303.79	2177.21	2160.33	2008.44	3085.79	2638.53	1817.16
1393.71	5548.96	5610.83	3529.62	2103.71	1856.21	1926.53	2072.77	1884.34	4986.47	2238.71	2151.52	1743.72	2258.39	1963.09	2182.46	2072.77	3135.88	1934.96	2705.57	2761.82	2331.52	2185.27	2126.21	2401.83	2168.4	2278.08	1946.21	3090.88	2722.45	1819.65
1392.82	5848.87	5708.27	3394.03	2086.47	1827.77	1906.51	2100.53	1971.18	4977.16	2286.12	2215.82	1898.07	2170.83	1996.49	2243.94	1959.93	3177.51	1971.18	2626.37	2795.08	2311.43	2114.59	2165.21	2435.15	2263.62	2243.94	1979.62	3140.96	2775.4	1889.63
1391.93	5693.22	5518.91	3309.1	2147.96	1852.76	2015.82	2088.92	1973.65	4959.43	2133.9	2207	1768.41	2156.39	2077.67	2190.13	2035.5	3236	2015.82	2659.65	2786.16	2316.65	2173.26	2263.23	2274.48	2212.62	2294.16	2049.56	3092.61	2752.43	1847.13
1391.04	5807.48	5478.59	3328.2	2198.18	1832.76	1962.06	2037.96	1942.39	5099.11	2212.24	2217.86	1762.48	2186.94	2071.69	2299.38	2080.12	3151.11	2001.42	2726.65	2780.06	2192.56	2091.37	2248.78	2282.51	2144.78	2274.08	1953.63	3004.93	2799.73	1900.22
1390.15	5674.37	5508.56	3445.66	2133.16	1798.71	1874.6	2158.45	1899.89	4946.46	2287.74	2231.53	1804.33	2186.56	2015.12	2248.39	1978.58	3071.86	1958.91	2672.77	2728.98	2352.38	2062.9	2166.89	2358	2141.59	2209.04	1922.37	3302.32	2759.9	1908.32
1389.27	5726.78	5617.19	3464.73	1981.05	1823.69	1910.8	1972.62	2020.39	5055.19	2144.03	2332.3	1823.69	2233.95	1927.66	2163.7	2082.21	3155.63	2048.49	2742.56	2885.87	2309.82	2141.22	2152.46	2467.18	2096.26	2166.51	1995.1	3076.95	2714.46	1832.12
1388.38	5745.44	5734.21	3351.74	2152.08	1814.94	1955.42	2048.13	1938.56	5071.16	2211.08	2185.8	1809.32	2188.61	2005.99	2112.75	2109.94	3242.17	1997.56	2713.99	2812.32	2211.08	2090.27	2123.99	2345.94	2140.85	2281.32	2017.23	3112.94	2652.18	1961.04
1387.49	5668.6	5643.32	3511.27	2115.19	1794.96	1904.51	2064.63	1983.17	5033.76	2230.36	2191.03	1780.92	2207.89	2112.38	2210.7	1994.4	3160.15	2042.16	2570.25	2789.36	2320.25	2061.82	2264.07	2323.06	2120.81	2272.5	1971.93	3056.21	2730.37	1910.13
1386.6	5765.91	5636.72	3454.49	2126.06	1716.01	1904.18	2027.76	1862.06	5018.84	2283.33	2224.36	1856.44	2190.65	2030.57	2238.4	2064.27	3224.19	2033.38	2656.87	2836.62	2204.7	2095.16	2263.67	2477.12	2165.38	2260.87	1963.16	3182.06	2640.02	1892.95
1385.7	5717.17	5708.75	3476.35	2086.37	1797.15	1884.2	2091.99	2055.49	5068.51	2131.3	2108.84	1811.19	2145.34	2004.94	2285.74	2094.8	3161.85	2027.41	2670.45	2838.93	2316.63	2148.15	2313.83	2341.91	2131.3	2243.62	2041.45	3201.17	2788.38	1945.97
1384.81	5806.02	5581.41	3467.33	2108.47	1847.37	1909.13	2116.89	1959.67	5163.09	2167.43	2229.2	1779.99	2178.66	1990.55	2246.04	2071.97	3175.34	1984.94	2686.83	2700.86	2319.04	1962.48	2257.27	2389.23	2229.2	2192.7	2015.82	3130.42	2692.44	1979.32
1383.92	5751.67	5712.37	3449.88	2211.96	1827.4	1936.87	2029.51	1934.07	5195.87	2240.04	2228.81	1799.33	2164.24	2043.54	2245.65	2063.19	3250.58	1981.79	2644.25	2846.36	2307.41	2096.88	2192.32	2397.23	2099.68	2155.82	2032.31	3087.77	2736.89	1872.31
1383.03	5896.61	5683.31	3539.09	2102.12	1815.85	1964.6	2051.6	1987.05	5093.93	2292.97	2239.65	1804.63	2093.7	1922.5	2205.97	2065.64	3205.11	1989.86	2691.5	2671.86	2318.23	2141.42	2225.61	2365.94	2194.74	2250.87	2003.89	3221.95	2803.77	1942.15
1382.14	5833.85	5471.86	3485.16	2230.84	1846.4	1924.97	2045.64	1986.71	5356.81	2202.78	2337.47	1798.7	2222.42	2079.31	2315.02	2143.85	3249.45	2000.74	2778.02	2761.19	2188.75	2127.01	2261.7	2452.52	2174.71	2258.9	2000.74	3083.89	2735.93	1972.68
1381.25	5902.97	5622.41	3509.8	2191.17	1874.14	1907.8	2143.47	1955.5	5221.21	2266.92	2286.56	1767.52	2146.28	2000.39	2320.23	2121.03	3206.79	2062.11	2626.04	2858.9	2269.73	2056.5	2325.84	2485.76	2208	2208	1963.92	3147.88	2746.68	1879.75
1380.36	5865.48	5761.69	3450.28	2171.15	1862.59	1963.57	2115.05	2044.92	5127.73	2283.36	2288.97	1845.76	2182.37	2039.31	2311.41	2117.85	3276.36	2075.78	2765.83	2880.84	2364.7	2126.27	2230.06	2403.98	2171.15	2230.06	1986.01	3192.21	2740.59	1932.72
1379.47	5847.63	5749.46	3522.6	2268.94	1890.31	1977.25	2167.97	1957.62	5258.66	2325.03	2386.73	1859.46	2268.94	1926.77	2296.98	2114.68	3180.44	2117.49	2841.08	2818.64	2316.61	2167.97	2254.91	2389.53	2114.68	2240.89	2055.78	3146.78	2762.55	1929.58
1378.58	5824.17	5821.37	3409.82	2058.23	1940.46	2032.99	2077.86	2038.6	5120.34	2240.5	2302.19	1763.8	2223.67	2131.14	2268.54	2055.43	3230.36	2147.96	2705.98	2893.86	2260.13	2251.71	2290.97	2358.27	2181.61	2159.18	2035.8	3213.53	2787.3	1904
1377.68	5845.59	5638.12	3496.14	2192.45	1856.01	1959.74	2088.71	2035.44	5054.96	2245.72	2240.11	1870.03	2144.78	2130.77	2304.59	2099.93	3140.08	2041.05	2755.98	2786.82	2366.27	2111.14	2228.89	2422.34	2226.09	2290.57	2077.5	3215.77	2750.37	1968.15
1376.79	5841.77	5749.26	3646.9	2119.18	1872.5	1866.9	2136	1979.02	5171.81	2287.37	2234.11	1920.16	2189.26	2032.28	2281.76	2043.5	3304.91	2037.89	2763.91	2873.23	2351.84	2220.1	2180.85	2354.65	2259.34	2315.4	2082.74	3201.2	2780.73	1892.13
1375.9	5938.84	5658.57	3609.83	2222.51	1841.35	1919.82	2155.25	2076.77	5302.64	2197.29	2233.72	1804.91	2385.07	2079.58	2197.29	2110.4	3200.64	2149.64	2729.79	2883.94	2357.04	2188.88	2278.56	2410.29	2236.52	2211.3	2160.85	3119.36	2813.87	2031.93
[truncated: 828 more rows]

## Sheet: 7 μmol L
1720.69	2353.83	1603.25	3677.86	4770.71	2305.79	1504.17	1315.02	2197.71	1651.28	1624.26	1678.31	1224.95	1930.5	1498.17	1645.28	1993.55	1801.4	2408.84	1698.14	3826.92	5030.19	2307.39	1602.23	1359.24	2386.64	1690.68	1641.46	1691.51	1287.39	2005.79
[truncated: 1,228 more rows]

[truncated: 7 more sheets: 10.5 μmol L, 14 μmol L, 0 hour , 6 hours, 12 hours, 24 hours, 36 hours]
