# Supplementary material for: Label-free detection of the cytotoxicity effect of cisplatin in human leukemic cells using Raman spectroscopy in conjunction with multivariate analysis
Source: Royal Society of Chemistry journal article supplement (doi:10.1039/d4ay00837e), 2024-01-01
Supplement: d4ay00837e2.pdf [file d4ay00837e2.pdf]

## Supplementary information

### **Label-free detection of cytotoxicity effect of cisplatin in human leukemic cells using Raman spectroscopy in conjunction with multivariate analysis**

Weiwei Chen, <sup>\*a</sup> Shenghe Weng, <sup>\*a</sup> Weixiong Zhong, <sup>a</sup> Hao Huang, <sup>b</sup> Chuanhe Yang, <sup>a</sup> Jian Yang, <sup>a</sup> Liangling Ye, <sup>a</sup> Wenshan Chen, <sup>a</sup> Chungong Song, <sup>a</sup> Shiyuan Du, <sup>a</sup> Xiaohu Chen, <sup>a</sup> and Yun Yu<sup>\*b</sup>

<sup>a</sup> School of Medical Technology and Engineering, Fujian Health College, Fuzhou, 350101, China. E-mail: wwchen072@163.com; shengheweng3322@163.com

<sup>b</sup> College of Integrative Medicine, Laboratory of Pathophysiology, Key Laboratory of Integrative Medicine on Chronic Diseases (Fujian Province University), Synthesized Laboratory of Integrative Medicine, Fujian University of Traditional Chinese Medicine, Fuzhou, 350122, China. E-mail: yuyunsatan@163.com

For detection, the laser was applied to the entire cell (as shown in Fig. S1). An average Raman spectrum was generated after 10 detections per cell, and a total of 300 cells were divided into 10 groups to obtain a total of 300 average spectra. Specific cellular assay details are shown in Table S1.

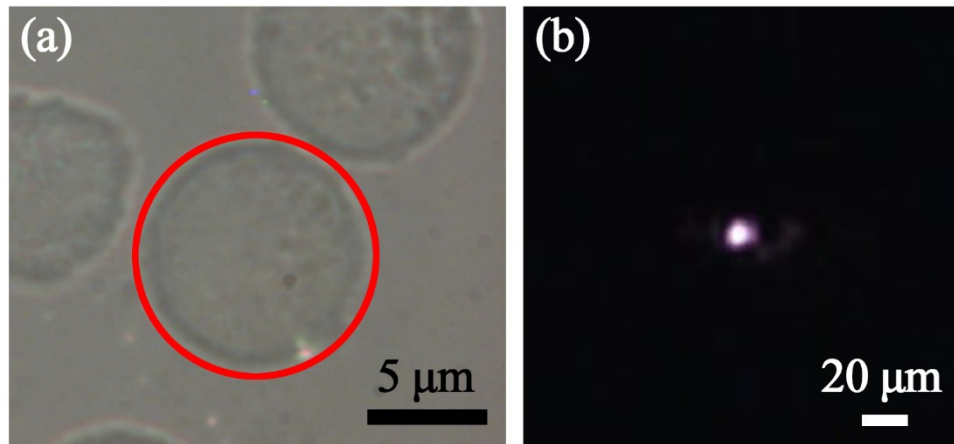

**Fig.S1** Micrographs of cells treated with 10.5 μmol/L cisplatin under white light (a) and laser (b).

**Table S1.** Details of cellular assay

| Groups                 | Number of tested cell per group | Number of spectral detections per cell | Average spectrum used per cell | Entire cell measurements |
|------------------------|---------------------------------|----------------------------------------|--------------------------------|--------------------------|
| 0 $\mu\text{mol/L}$    | 30                              | 10                                     | ✓                              | ✓                        |
| 3.5 $\mu\text{mol/L}$  | 30                              | 10                                     | ✓                              | ✓                        |
| 7.0 $\mu\text{mol/L}$  | 30                              | 10                                     | ✓                              | ✓                        |
| 10.5 $\mu\text{mol/L}$ | 30                              | 10                                     | ✓                              | ✓                        |
| 14.0 $\mu\text{mol/L}$ | 30                              | 10                                     | ✓                              | ✓                        |
| 0 hour                 | 30                              | 10                                     | ✓                              | ✓                        |
| 6 hours                | 30                              | 10                                     | ✓                              | ✓                        |
| 12 hours               | 30                              | 10                                     | ✓                              | ✓                        |
| 24 hours               | 30                              | 10                                     | ✓                              | ✓                        |
| 36 hours               | 30                              | 10                                     | ✓                              | ✓                        |

As can be seen in Fig. S2, guanine has a characteristic band at  $1303\text{ cm}^{-1}$  in its Raman spectrum, so the  $1303\text{ cm}^{-1}$  band in Fig. 1 and 4 was assigned to guanine.

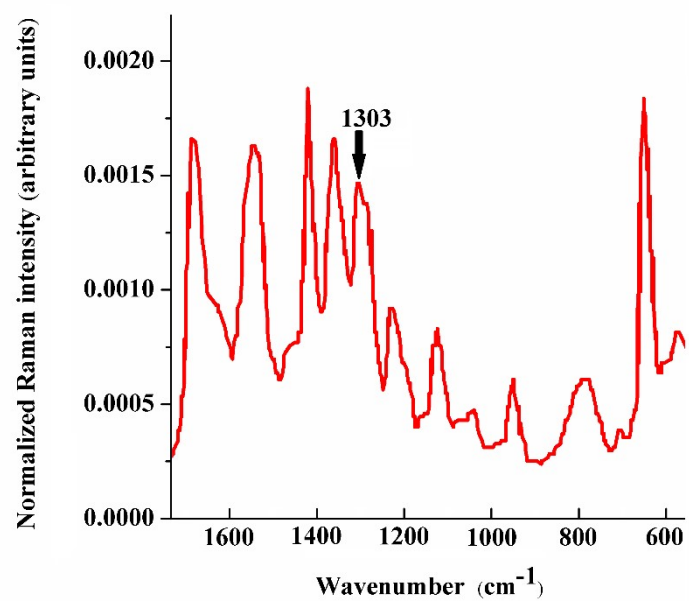

Fig. S2 Raman spectrum of guanine.

**Code:**

```
x=xlsread('c:/2.xlsx');
y=xlsread('c:/1.xlsx');
[XL,YL,XS,YS,BETA,PCTVAR,MSE,stats] = plsregress(x,y,20,'cv',10);
add=cumsum(100*PCTVAR(2,:));
figure
plot(1:20,cumsum(100*PCTVAR(2,:)),'-bo');
xlabel('Number of PLS components');
ylabel('Percent Variance Explained');
figure
plot(0:20, (MSE(2,:)),'-bo');
xlabel('Number of PLS components');
ylabel('Estimated mean squared prediction error');
a=XS(:,1:2);
b=xlsread('c:/1.xlsx');
test=XS(:,1:2);
y_test=xlsread('c:/1.xlsx');
[train,pstrain] = mapminmax(a,-1 ,1);
x1 = train';
[train_labels,pslabels] = mapminmax(b,-1 ,1);
y1=train_labels';
[test_w,pstest] = mapminmax(test,-1 ,1);
test1 = test_w';
[test_w_labels,pslabels] = mapminmax(y_test,-1 ,1);
y_test1 = test_w_labels';
[bestacc,bestc,bestg] = SVMcg(y1,x1,-10,10,-10,10,10,1,1,0.5);
cmd = ['-c ',num2str(bestc),' -g ',num2str(bestg)];
model = libsvmtrain(y1,x1,cmd);
[predict_label, accuracy, decision_values] = libsvmpredict(y_test1, test1, model);
```
